# Supplementary material
Source: publisher site journal article supplement (https://www.spandidos-publications.com/4631/downloadSupplementary)
Supplement: Supplementary file 1 [file downloadSupplementary]

## Sheet: Table SⅣ Merged（TCGA+GTEx)
Table SⅣ. lncRNA screening of gene expression data from TCGA and the GTEx project.
Tag	GTEX.S33H.1226.SM.4AD69	GTEX.VJYA.0826.SM.4KL1M	GTEX.ZF3C.2026.SM.4WWB5	GTEX.XUW1.1726.SM.4BOOZ	GTEX.OOBJ.1026.SM.3NB2L	GTEX.ZLFU.0726.SM.57WF6	GTEX.QEL4.1326.SM.447AD	GTEX.11DXX.0926.SM.5H112	GTEX.ZAB4.1726.SM.5HL8C	GTEX.145ME.0326.SM.5S2QO	GTEX.YB5E.0526.SM.4VDSD	GTEX.12WSG.1026.SM.5EGII	GTEX.ZV7C.0726.SM.59HKH	GTEX.V1D1.0726.SM.4JBH7	GTEX.TKQ2.0426.SM.4DXUO	GTEX.RWS6.1126.SM.47JXC	GTEX.145MO.2126.SM.5Q5CZ	GTEX.13W3W.1026.SM.5IFG4	GTEX.N7MT.1626.SM.3LK71	GTEX.131XG.1426.SM.5GCMO	GTEX.11XUK.0626.SM.5N9ES	GTEX.QLQW.0326.SM.447A8	GTEX.T8EM.0826.SM.4DM76	GTEX.ZZPU.0726.SM.5N9C8	GTEX.ZLWG.0326.SM.4WWC7	GTEX.Y3IK.0426.SM.4WWE2	GTEX.YEC3.0626.SM.4YCFE	GTEX.13N11.0226.SM.5KM3C	GTEX.X4LF.0326.SM.4QAS9	GTEX.13FTW.0526.SM.5IFIP	GTEX.11ILO.1526.SM.5A5KZ	GTEX.11TT1.0326.SM.5LUAY	GTEX.13OVI.0526.SM.5IFFQ	GTEX.145MN.1426.SM.5SI9H	GTEX.XPVG.0326.SM.4B653	GTEX.ZAK1.2326.SM.5CVMY	GTEX.ZDYS.2526.SM.4WKGU	GTEX.XXEK.1726.SM.4BRVB	GTEX.Y8E4.1326.SM.5IFIY	GTEX.ZP4G.0426.SM.4YCER	GTEX.WHSB.0726.SM.4M1XQ	GTEX.146FQ.1526.SM.5Q5CX	GTEX.V955.0326.SM.4JBGV	GTEX.13PL7.2226.SM.5L3IC	GTEX.12WSD.1626.SM.5GCNR	GTEX.12WSK.0226.SM.5BC62	GTEX.Y8LW.1026.SM.5IFJY	GTEX.U8XE.2026.SM.3DB8S	GTEX.13U4I.1526.SM.5IFFF
MIR1302-2HG	0	0	0	0	0	0	0	0	0	0	0	0	0	0	0	0	0	0	0	0.152547	0.0721797	0	0	0	0	0	0	0	0	0	0	0	0	0	0	0	0	0	0	0	0	0	0	0.104715	0	0	0	0	0
AL627309.1	0.432482	0.362327	0.725204	0.762833	0.666758	0.35149	0.50368	0.597035	0.514588	0.407939	0.902277	0.880084	1.09294	0.50065	0.664204	0.620498	1.05132	0.573175	0.378776	1.01712	0.682343	1.19928	1.10919	1.13291	0.632931	0.423399	0.848483	0.3096	0.267469	0.712219	0.562504	1.58753	0.26839	0.440486	0.516786	0.876083	0.793833	1.18947	0.804671	0.665998	0.592736	0.827192	0.78211	0.571869	1.1684	0.634585	0.999623	0.821721	0.908028
AL732372.1	0	0	0	0	0	0	0	0	0	0.25426	0	0	0	0	0	0.219159	0	0	0	0	0	0	0	0	0	0.220945	0	0	0	0	0	0	0	0	0	0	0	0	0	0	0	0	0	0	0	0	0	0	0
AC114498.1	0.40122	0	0.072017	0	0	0	0	0	0	0	0.0947576	0	0	0	0	0	0	0	0	0	0	0	0	0	0	0	0	0	0	0	0	0	0.515058	0.181745	0	0	0	0	0	0	0	0	0	0	0.219716	0	0	0	0
AL669831.5	1.53744	1.48098	0.902277	1.03372	1.70264	1.03569	1.41785	1.46662	1.08879	0.999623	1.51268	0.967147	1.99507	1.48767	1.18947	1.65763	1.48098	1.24706	0.657701	1.61542	1.52721	0.777363	1.13691	1.38694	0.955803	1.36242	0.848483	1.56793	0.893261	1.18037	1.45356	1.42102	1.21341	1.40208	1.37439	0.938241	1.08879	1.27568	1.42745	1.0767	1.81026	1.5057	1.04934	1.1684	1.61542	1.02621	0.890368	2.3217	1.57197
FAM87B	0.0664163	0.0395809	0.107684	0.099212	0.190473	0.136828	0	0.0737704	0.0730065	0	0.237061	0.0794373	0.0847062	0.0826448	0	0.0614331	0.143923	0.147819	0	0.0703533	0.0844284	0.0731268	0.134235	0.0860821	0.238171	0.164238	0.10493	0.227163	0.0660083	0.0877553	0.052302	0.274375	0.128965	0.153295	0.0986464	0	0.161473	0.110616	0.17368	0.0763144	0.277149	0.0429953	0.183474	0.0844284	0.117308	0.15674	0.170979	0.281781	0.107398
LINC00115	1.81026	0.777363	2.14991	0.777363	1.23409	0.506061	1.68882	0.570119	1.83508	0.671408	0.840349	1.24197	0.717008	1.92485	0.691781	0.505417	1.41248	0.712219	1.95343	0.648297	0.697552	0.768143	0.960524	0.547393	0.714133	1.45992	0.550858	2.05644	0.893261	0.374185	1.85085	0.564612	0.734412	0.41159	0.765113	1.81513	0.469207	1.1684	1.24706	0.459662	0.968838	1.1684	0.883043	0.495852	1.32229	0.413824	0.856309	1.21082	0.963809
FAM41C	0	0.958887	0.0561975	0.099212	0.0841812	0	0.0845854	0.71909	0.801418	0.227727	1.04153	0.192026	0.772688	0.301421	0	1.1684	0.0698812	0.292836	0	0.543364	0.468649	0.1433	0.166696	1.65763	0.714133	0.0973112	0.16439	1.08879	0.267469	0.145026	0.654258	0.648297	0.752414	0.289011	0.0428617	0.119758	0.381041	0.242826	0.0541223	0.268886	0	0.515058	0.23072	0.881563	0.938241	0.312666	0.111051	0.383198	0.155681
AL645608.6	0	0	0	0	0	0	0	0	0.224402	0	0	0	0	0	0	0	0	0	0.288698	0	0	0	0	0.185666	0	0	0	0	0	0	0	0	0	0	0	0	0	0	0	0	0	0	0	0	0	0	0	0	0
AL645608.2	0.121548	0.0639811	0.026965	0	0.0699922	0.08151	0.0688976	0	0.0388806	0.0935807	0.0608666	0.0929584	0.0368208	0.186602	0	0.114224	0.0698812	0.0667603	0.0806179	0	0.0844284	0	0.0991511	0.0552087	0	0.0566978	0	0.0504427	0.0660083	0.0625547	0.0612724	0.0602366	0	0.0425379	0.0428617	0	0.0508555	0	0	0.0544015	0.0869166	0.0523496	0.049917	0.0605955	0.0896522	0.0416868	0	0.0695902	0
AL645608.4	0.102862	0	0	0	0	0	0	0	0	0	0	0.154765	0	0	0	0	0	0	0	0	0	0	0	0	0	0.0813551	0	0.166069	0	0	0	0	0	0	0	0	0	0.242826	0	0	0	0	0	0	0	0.129128	0	0	0
LINC02593	0.284526	0.917047	0.473073	0.135816	0.26839	0.384845	0.117503	0.214589	0.417482	0.425956	0.459662	0.154765	0.457529	0.793833	0.32676	0.23343	0.282152	0.135025	0.383635	0.0840091	0.172695	0.430896	0.344317	0.666758	0.25426	0.622802	0.203954	0.401715	0.241908	0.171299	0.829722	0.105873	0.199298	0.181745	0.303184	0.158164	0.349063	0.3164	0.132626	0.201814	0.245165	0.568656	0.21113	0.293891	0.304023	0.444505	0.0704447	0.383198	0.365125
AL645608.7	1.95873	1.89585	3.01452	1.35341	1.62732	1.06646	0.687021	2.81909	1.49117	1.73476	2.23959	1.08677	1.76251	2.10893	2.20801	1.98271	0.713166	1.0969	4.09222	2.13523	3.46468	2.27125	1.35341	2.19268	1.65321	1.90117	1.64056	1.29744	1.71172	2.35747	3.07546	1.00293	1.29211	0.880084	1.61921	2.27929	1.34184	2.72363	3.10824	0.694661	1.42419	2.09589	2.56815	1.48098	1.32229	1.3897	3.50605	2.40914	2.92872
AL645608.8	0	0	0.432482	0.135816	0	0.107146	0.117503	0.156336	0.179964	0	0.0711879	0	0.304254	0.348056	0.147045	0.324955	0.0810574	0.226334	0.257293	0.0976288	0.209578	0.216963	0.416547	0.237516	0.0841812	0.488533	0.203954	0.338794	0.095252	0.258353	0	0.114581	0.0876759	0.181745	0.222043	0.172296	0.242365	0.466937	0.0752674	0.201814	0.182749	0	0.140425	0.140733	0	0.1433	0.126244	0.710218	0.155681
LINC01342	0.708282	0.396802	0.418347	0.156897	0.369156	0.0678785	0.271674	0.137369	0.394804	0.388633	0.257603	0.0794373	0.369156	0.456014	0.526036	0.256083	0.0508082	0	0.510364	0.0976288	0.320776	0.233204	0.111051	0.216963	0.0841812	0.207659	0.284526	0.187894	0.194214	0.188388	0.338794	0.330421	0.128965	0.139698	0.353331	0	0.161473	0.38741	0.19989	0.190961	0.196926	0.0639811	0.791551	0.115371	0.117308	0.0844284	0.210282	0.46745	0
AL390719.2	6.30796	8.32585	4.09222	5.54793	4.26934	6.30796	4.63035	5.09563	4.26934	7.90326	5.54793	4.47958	5.81952	7.53393	6.9588	5.67411	3.46468	5.09563	6.30796	4.20716	5.81952	6.71068	5.95825	6.50407	5.20259	4.7967	5.81952	4.7967	6.71068	5.81952	4.71706	6.2227	5.09563	3.92243	5.81952	3.97621	5.20259	4.7967	5.20259	6.04784	5.81952	3.24393	7.37314	5.54793	2.78054	4.7967	5.09563	5.67411	3.67179
AL162741.1	0.0664163	0.234604	0.160052	0.126056	0.0841812	0.248333	0.223237	0.227542	0.0994543	0.201363	0.137099	0.252474	0.0699922	0.115138	0.258128	0.13929	0.181428	0.147819	0.190473	0.363123	0.0610902	0.105362	0.144026	0.165383	0.141664	0	0.0496398	0.166069	0.0660083	0.0625547	0.100939	0.164238	0.414213	0.0860821	0.138051	0	0.0721797	0.184948	0.132626	0.0653709	0	0.0886302	0.183474	0.115371	0	0.0416868	0.111051	0.213944	0.0570073
LINC01786	1.08465	1.91314	1.57197	1.36846	1.50191	1.79155	1.32804	0.859242	1.55606	1.02985	1.04153	2.02013	1.71646	1.14797	1.1684	1.82	0.678689	0.900721	1.20625	1.55606	1.42102	1.41248	1.63601	1.88564	0.605412	1.79572	1.01907	1.26792	1.17272	1.55997	1.32229	0.52702	1.15237	1.47779	1.29744	1.01173	1.16388	0.702405	2.79329	1.35647	2.23959	2.3388	1.82496	2.50603	2.65363	1.08879	1.95873	1.11126	1.61921
LINC01770	3.67179	3.07546	3.2096	0.463406	1.09872	1.52382	1.03965	0.482224	0.924334	1.05536	1.18286	0.693786	1.2577	3.81408	2.40914	0.918509	1.00128	0.12437	1.89052	0.664204	0.857585	1.45693	1.5488	0.852319	1.01533	1.64056	0.970361	1.84024	1.28956	0.941402	3.17555	2.19268	0.793833	1.66612	1.19436	0.480383	0.706461	1.89585	0.7151	1.01533	1.10079	0.743689	2.10893	1.22391	0.304023	0.870111	1.83508	3.54582	2.54807
AL590822.1	0	0.291848	0.231486	0	0	0	0	0	0	0	0	0	0	0	0	0	0	0	0	0.326487	0.228665	0.419196	0	0	0	0	0	0.3096	0	0	0.23343	0	0	0	0.461822	0	0.30865	0	0	0	0	0.246214	0	0	0	0	0	0	0
AL139246.5	0.783213	0.671408	1.02796	0.777363	1.00992	0.994765	0.610157	0.944732	0.83093	0.538917	1.02621	2.14991	0.698474	0.732323	0.517346	1.20172	0.545429	0.871436	0.763987	1.27309	1.86064	1.1435	0.975341	1.1435	0.729296	0.644778	0.829722	1.13069	1.01533	1.06274	0.808206	1.02446	1.07471	0.690024	0.577125	0.60694	1.26792	0.808206	0.687021	0.947964	0.813211	0.86603	0.733323	0.370949	0.622021	0.542698	1.03965	1.07056	0.978991
AL139246.3	0	0.245663	0.0643588	0	0	0	0.144781	0	0.556658	0	0.0947576	0.27046	0.0847062	0.0601399	0	0	0	0.226334	0.137522	0	0.219437	0	0	0.0739641	0.207205	0	0.203954	0.210736	0	0.115687	0.0790515	0	0.301421	0.181745	0.0842421	0.21417	0.186224	0.259131	0.186481	0	0.144911	0.0886302	0	0	0	0.0976288	0.0953538	0.125263	0
AL592464.2	0	0	0	0	0	0	0	0	0	0	0	0	0	0	0	0	0	0	0	0	0	0	0	0	0	0	0	0	0	0	0	0	0	0	0	0	0	0	0	0	0	0	0	0	0	0	0	0	0
AL592464.1	0	0	0	0	0	0	0	0	0	0	0	0	0	0	0	0	0	0	0	0	0	0	0	0	0	0	0	0	0	0	0	0	0	0	0	0	0	0	0	0	0	0	0	0	0	0	0	0	0
AL590438.1	0.0826448	0.0395809	0.0353593	0.099212	0.0538441	0	0.0688976	0	0.0465857	0.0850772	0.0391027	0	0.0699922	0.0258953	0.116056	0.0699367	0.0810574	0.0667603	0.0806179	0.0557975	0.0498668	0.0631919	0.0895155	0.0333572	0.0479195	0.031098	0	0	0.0660083	0	0.0455534	0.0602366	0.0475765	0.0425379	0.0521681	0.107563	0.0420575	0.0742301	0.0428617	0.036151	0	0.0639811	0.0849787	0.036151	0	0.0416868	0.0521215	0.186895	0
AL512413.1	0.246362	0.537291	0.160052	0.561816	0	0.718049	0.285853	0	0	0	0.213199	0.677717	0	0.285304	0.371497	0	0	0	0.107684	0.242136	0	0.328666	0	0.299933	0.25426	0.477213	0	0.236106	0.676745	0	0.461272	0	0	0	0	0.434966	0	0.305519	0.579348	0	0	0.352631	0.249202	0.293891	0.369494	0.227357	0.197508	0	0.463406
LINC01134	0.71909	0.15674	0.275007	0.135816	0.253687	0.121716	0.352631	0.241908	0.0994543	0.25426	0.0947576	0.137522	0.0847062	0.186602	0.507726	0.101116	0.104088	0.12437	0.257293	0.171898	0.274375	0.1433	0.144026	0.155135	0.172296	0.0464287	0.242595	0.123129	0.095252	0.213785	0.0699367	0.264267	0.0475765	0.0615802	0.115181	0.133206	0.0508555	0.466937	0.148561	0.142766	0.154641	0.130815	0.743689	0.0958273	0.17057	0	0.0824789	0.236497	0.121149
LINC01346	0	0	0	0	0	0	0	0	0	0	0	0	0	0	0	0	0	0	0	0	0	0	0	0	0	0	0	0	0	0	0	0	0	0.0996802	0	0	0	0	0	0	0	0	0	0	0	0	0	0	0
LINC01345	0	0	0	0	0	0	0	0	0	0	0	0	0	0	0	0	0	0	0	0	0	0	0	0	0	0	0	0	0	0	0	0	0	0	0	0	0	0	0	0	0	0	0	0	0	0	0	0	0
LINC01777	0	0	0	0	0	0	0	0	0	0	0.0391027	0	0	0	0	0	0	0	0	0	0	0	0	0	0	0	0	0	0	0	0	0	0	0	0	0	0	0	0	0	0	0	0	0	0	0	0	0	0
Z98747.1	0	0	0	0	0	0	0	0	0	0	0	0	0	0	0	0	0	0	0	0	0	0	0	0	0	0	0	0	0	0	0	0	0	0	0	0	0	0	0	0	0	0	0	0	0	0	0	0	0
LINC01646	0	0	0	0	0	0	0	0	0	0	0	0	0	0	0	0	0	0	0	0	0	0	0	0	0	0	0	0	0	0	0	0	0	0	0	0	0	0	0	0	0	0	0	0	0	0	0	0	0
AL691497.1	0	0	0	0	0	0	0	0	0	0	0	0	0	0	0	0	0	0	0	0	0	0	0	0	0	0	0	0	0	0	0	0	0	0	0	0	0	0	0	0	0	0	0	0	0	0	0	0	0
AL365255.1	0	0	0	0	0	0	0	0	0	0	0	0	0	0	0	0	0	0	0	0	0	0	0	0	0	0	0	0	0	0	0	0	0	0	0	0	0	0	0	0	0	0	0	0	0	0	0	0	0
LINC00337	0	0	0	0	0	0	0	0.0618092	0	0.168112	0.0502059	0	0	0	0	0	0	0	0	0	0	0	0	0	0	0	0	0	0	0	0	0.0980296	0	0.0860821	0	0	0	0.0996123	0	0.0451138	0	0.0429953	0.140425	0	0	0	0	0	0
LINC01672	0	0	0	0	0	0	0	0	0	0	0	0	0	0	0	0	0	0	0	0	0	0	0	0	0	0	0	0	0	0	0	0	0	0	0	0	0	0	0	0	0	0	0	0.149118	0	0	0	0	0
AL359881.3	0	0.0395809	0.072017	0.126056	0.0538441	0.0937905	0.0845854	0.0737704	0.0465857	0	0.0502059	0	0.0368208	0.0826448	0	0.0528177	0.0508082	0.135025	0.0735347	0	0.0990901	0.0731268	0.111051	0.046865	0.0721797	0.140425	0	0.236106	0.0863952	0.074768	0.052302	0.0789544	0	0.0425379	0.0723851	0	0.0916209	0.110616	0	0	0	0	0.049917	0.0262927	0	0.0632845	0	0.155008	0
AL359881.2	0.246362	0.190473	0.072017	0	0.137099	0.300474	0.153295	0.227542	0.437567	0.821721	0.276182	0.50418	0.25397	0.269636	0.353712	0.127008	0	0.454111	0.361654	0	0.386591	0.577833	0.36645	0.0860821	0.123	0.761679	0.118201	0.434018	0.143923	0.327374	0.0895155	0.294478	0.233656	0.0996802	0.429875	0.248543	0.219951	0.292212	0.213413	0	0.296696	0	0.319454	0.072017	0.219716	0.113856	0.292575	0.514588	0
AL359881.1	0	0	0	0	0.546044	0	0	0	0	0	0	0	0.670491	0.880084	0.747172	0.494213	0	0.884523	0.487285	0	0.354657	0	0	0.322436	0	0.691781	0	0.481778	0.606176	0	0	0.707402	0.472661	0.376793	0.944732	0.856309	0.935147	0.625413	0.442982	0	0.736509	0.958887	1.02274	0	0	0	0.717008	0.46745	0
AL034417.2	0.102862	0.0565523	0.0996123	0.0890443	0	0.152547	0.0759626	0.0737704	0.0899951	0.0935807	0.0391027	0.0794373	0.0699922	0.0420811	0.0985749	0.0528177	0.0925858	0.114988	0.169274	0.0840091	0.115815	0.117308	0	0.176089	0.0841812	0.0464287	0.0496398	0.105298	0	0.145026	0.0612724	0.133048	0.128965	0.0425379	0	0	0.0508555	0.121937	0.0647148	0.0763144	0.0869166	0.035029	0.114581	0.036151	0.102924	0.1433	0.126244	0.155008	0
AL358876.2	0	0	0	0	0	0	0	0	0	0	0	0	0	0	0	0	0	0	0	0	0	0	0	0	0	0	0	0	0	0	0	0	0	0	0	0	0	0	0	0	0	0	0	0	0	0	0	0	0
AL357552.2	0	0	0	0	0	0	0	0	0	0	0	0	0	0	0	0.277149	0	0	0	0	0	0	0	0	0.289635	0	0	0	0	0	0	0	0	0	0	0	0.479781	0	0	0	0	0	0	0	0	0	0	0	0
MIR34AHG	0.217589	0.331093	0.137369	0	0.253687	0	0.770349	0.214589	0	0.327033	0.346259	0.433497	0.291848	0.255284	0.394804	0.266918	0.348365	0.407589	0.128965	0.225009	0.291321	0.512945	0	0	0	0.301421	0	0.386174	0.470284	0.584295	0.284987	0.274375	0	0.167542	0.161123	0	0.571869	0.38741	0.752414	0	0.491085	0	0.219951	0.495852	0	0.202175	0	0.213944	0
AL928921.1	0	0	0	0	0	0	0	0	0	0	0.266011	0	0	0	0	0	0	0	0	0	0	0.129456	0	0	0	0	0	0	0	0	0	0	0	0	0	0	0	0	0	0.0763144	0	0	0	0	0	0	0	0	0
LINC01647	0	0	0	0	0	0	0	0	0	0	0	0.0929584	0	0	0	0	0	0	0	0	0	0	0	0	0	0	0	0	0	0	0	0	0	0	0	0	0	0	0	0	0	0	0	0	0	0	0	0	0
AC243836.1	0	0	0	0	0	0.228138	0	0.332029	0	0	0	0	0.145262	0.223807	0.517346	0.482224	0.168686	0.50971	0	0.530416	0	0.271455	0.975341	0.12744	0	0.258353	0.193661	0.348673	0	0.481333	0.254979	0.425567	0.343722	0	0.150114	0	0.31908	0	0.17368	0.377232	0.430385	0	0.19307	0.235958	0.520021	0.365575	0	0.483778	0
AC254633.1	0	0	0.632176	0	0	0.629741	0	0.499309	0.417482	0.754772	0.502499	0	0.203494	0	0.441409	0	0.263065	0.304023	0.128965	0.293349	0.209578	1.10079	0.461272	0.192223	0.550858	0.207659	0.515641	0.943058	0	0.845782	0.695536	0.374185	0.280533	0.776173	0.5876	0.876083	0	0.361216	0.687021	0.567303	0.706461	0.222233	0.298224	0.353331	0.787916	0	0.431442	0	0.302008
AC245056.1	0	0	0	0	0	0	0	0	0	0	0	0	0	0	0	0	0	0	0	0	0	0	0	0	0	0	0	0	0	0	0	0	0	0	0	0	0	0	0	0	0	0	0	0	0	0	0	0	0
AC243961.1	0	0	0	0	0	0	0	0	0	0	0	0	0	0	0	0	0	0	0	0	0	0	0	0	0	0	0	0	0	0	0	0	0	0	0	0	0	0	0	0	0	0	0	0	0	0	0	0	0
AL359771.1	0	0	0	0	0	0	0	0	0	0	0	0	0	0	0	0	0	0	0	0	0	0	0	0	0	0	0	0	0	0	0	0	0	0	0	0	0	0	0	0	0	0	0	0	0	0	0.369156	0	0
AL357873.1	0	0	0	0	0	0	0	0	0	0	0.444027	0	0	0	0	0	0	0	0	0	0	0	0	0	0	0	0	0	0	0	0	0	0	0	0	0	0	0	0	0.348056	0	0	0	0	0	0.804671	0	0	0
KAZN-AS1	0	0	0	0	0	0	0	0	0	0	0	0	0	0	0	0	0	0	0	0	0	0	0	0	0	0	0	0.123129	0	0	0	0	0	0	0	0	0	0	0	0	0	0	0	0	0	0	0	0	0
AL031283.1	0.112465	0.109872	0.0303587	0.099212	0.0538441	0.0937905	0.0759626	0.0618092	0	0	0.107146	0.0794373	0.145262	0.0352676	0.136733	0.0528177	0.0413799	0.0942899	0.0415507	0.113929	0.0498668	0.0847062	0.0895155	0.0293945	0.0601399	0.0566978	0.0406721	0.0658188	0.0544015	0.0625547	0.0455534	0.0675734	0.0669142	0.0615802	0.0428617	0.107563	0.0621069	0.347049	0.0541223	0.0451138	0.0584458	0.035029	0.049917	0.0308068	0.0896522	0.052235	0.0704447	0.170445	0.121149
AL121992.2	0	0	0	0	0	0	0	0	0	0	0	0	0	0	0	0	0	0	0	0	0	0	0	0	0	0	0	0	0	0	0	0	0	0.41159	0	0	0	0	0	0	0	0	0	0	0	0	0	0	0
LINC01772	0.548797	0.52414	0.564612	0.378048	0.666758	0.531046	0.662327	0.665101	0.410044	0.514117	0.381474	0.636086	0.31835	0.581424	0.691781	0.505417	0.573175	0.528473	0.355765	0.687021	0.291321	0.656768	0.623634	0.658634	0.584295	0.423399	0.458035	0.452112	0.45916	0.481333	0.596339	0.348673	0.482728	0.423908	0.627902	0.520622	0.357678	0.534245	0.481778	0.410515	0.3096	0.475561	0.697552	0.420078	0.520021	0.381041	0.348365	0.31745	0.276182
AL137802.1	0	0	0	0	0	0	0	0	0	0	0	0	0	0	0	0	0	0	0	0	0	0	0	0	0	0.288384	0	0	0	0	0	0	0	0	0	0	0	0	0	0	0	0	0	0	0	0	0.359215	0	0
LINC01783	0.503179	0.908028	0.349453	0.424418	1.50191	1.16614	0.487285	1.17531	0.50065	0.25426	0.538917	1.19188	0.814423	0.43648	0.485625	0.749235	0.870111	0	0.46745	1.58753	0.47622	0.396802	0.656768	0.495852	1.19683	0.499309	1.38694	0.569388	0.352313	0.521223	0.397986	0.369156	1.68882	0.735502	0.382237	0.777363	0.388224	0.65587	0.804671	0.896278	0.462889	0.805807	0.791551	0.561816	0.727251	0.743689	0.567303	0.344721	1.09294
AL137798.1	0	0	0	0	0	0	0	0	0	0	0	0	0.215476	0	0	0	0	0	0	0	0	0	0	0	0	0.220945	0	0	0	0	0	0	0	0	0.429875	0	0	0.643107	0	0	0	0.233204	0	0	0	0	0	0	0
AL021920.1	0	0	0	0	0	0	0	0	0	0	0	0	0	0	0	0	0	0	0	0	0	0	0	0	0	0	0	0	0	0	0	0	0	0	0	0	0	0	0	0	0	0	0	0	0	0	0	0	0
BX284668.1	0	0	0	0	0	0	0	0	0	0	0	0	0.102666	0.0420811	0	0	0	0.105125	0	0	0	0	0	0	0	0	0	0	0	0	0	0	0	0	0	0	0	0	0	0	0.125699	0	0	0.0504427	0	0.0844284	0	0	0
BX284668.2	1.37439	0.723248	0.742685	1.95343	2.06317	0.994765	0.864722	1.85574	0.377672	0.595611	0.805807	1.39246	0.977166	0.613204	1.13491	0.943058	0.870111	0.370657	0.443504	1.95873	0.913907	1.16614	0.845782	0.560328	0.965457	0.507726	1.35035	0.481778	1.04153	1.35035	0.461272	0.716054	1.76251	1.31408	0.717008	1.01173	0.998058	1.5057	1.15455	1.5057	0.758208	1.10712	1.23138	0.694661	1.18286	1.07471	0.639722	0.758208	1.63167
BX284668.5	7.21236	4.14837	7.21236	8.80129	6.9588	6.13743	6.13743	6.50407	5.67411	6.9588	6.50407	6.30796	5.20259	6.50407	7.90326	5.20259	4.40899	9.99946	5.42362	6.30796	7.53393	8.32585	5.20259	7.21236	5.81952	4.63035	4.47958	2.56815	3.97621	8.80129	4.09222	6.71068	7.21236	2.16443	3.07546	2.58798	8.80129	6.71068	5.54793	9.99946	7.21236	5.67411	8.32585	5.95825	5.54793	5.20259	7.21236	5.95825	6.13743
BX284668.6	0.35149	0	0	0	0.474193	0.228138	0	0	0	0	0	0.402151	0	0.223807	0	0	0	0	0.257293	0	0	0.458035	0.315492	0.237516	0.351901	0	0	0.187894	0.208851	0	0	0	0.186089	0	0.150114	0	0	0	0	0	0	0.408839	0.495852	0	0.304023	0	0	0.201099	0
AL590644.1	0	0	0	0	0	0	0	0	0	0	0	0	0	0	0	0	0	0	0	0	0	0	0	0	0	0	0	0	0	0	0	0	0	0	0	0	0	0	0	0.036151	0	0	0	0	0	0	0	0	0
AL136529.1	0	0	0	0	0.117042	0	0	0	0	0	0	0	0	0	0	0	0	0	0	0	0	0	0	0	0	0	0	0	0	0	0	0	0	0	0	0	0	0	0	0	0	0	0	0	0	0	0	0	0
LINC01654	0	0	0	0	0	0	0	0	0	0	0	0	0	0.0352676	0	0	0	0	0	0	0	0	0	0	0	0	0	0	0	0	0	0	0	0	0	0	0	0	0	0	0	0	0	0	0	0	0	0	0
AL591896.1	0	0	0	0	0	0	0	0	0	0	0	0	0	0	0	0	0	0	0	0	0	0	0	0	0	0	0	0	0	0	0	0	0	0	0	0	0	0	0	0	0	0	0	0	0	0	0	0	0
Z98257.1	0	0.0565523	0	0	0	0	0.100033	0.0500885	0.064601	0	0.0608666	0	0	0.126691	0	0	0.0605955	0	0	0	0.0844284	0	0	0.0293945	0.0479195	0.0464287	0.10493	0	0.208851	0.0625547	0.0328534	0.0675734	0.0475765	0	0	0	0	0.110616	0	0.156112	0	0.035029	0.0675734	0.036151	0	0.0976288	0	0.170445	0.069478
LINC01757	0	0	0	0	0	0	0	0	0	0	0	0	0	0	0	0	0	0	0	0	0	0	0	0	0	0	0	0	0	0	0	0	0	0	0	0	0	0	0	0	0	0	0	0	0	0	0	0	0
LINC01141	0.0503764	0.0327141	0	0	0.0538441	0	0	0	0	0	0	0.12273	0	0	0	0	0	0	0.0502827	0	0	0	0	0	0	0.031098	0	0	0	0	0	0	0.0565176	0	0	0	0.0420575	0	0	0	0	0	0	0.0230708	0	0	0	0.0584458	0
AL139254.1	0	0	0	0	0	0	0	0	0	0	0	0	0	0	0	0	0	0	0	0	0	0	0	0	0	0	0	0	0	0	0	0	0	0	0	0	0	0	0	0	0	0	0	0	0	0	0	0	0
AL592309.2	0	0	0	0	0	0	0	0	0	0	0	0	0	0	0	0	0	0	0	0	0	0	0	0	0	0	0	0	0	0	0	0	0	0	0	0	0	0	0	0	0	0	0	0	0	0	0	0	0
LINC01635	0.131225	0	0.418347	0.167542	0.369156	0.264267	0.144781	0.545429	0.179964	0	0.188761	0	0	0	0	0.114224	0.424418	0.12437	0.908028	0.342451	0.0844284	0.159604	0.461272	0.2825	0	0	0.10493	0.113642	0.723248	0.288116	0.0790515	0	0.21113	0.181745	0.171139	0.520622	0.273856	0.275689	0.102299	0.167397	0	0.555404	0.202834	0.277605	0.201975	0.0976288	0.184029	0.613204	0.321122
LINC01355	3.31792	2.0699	2.27125	1.48416	2.62088	2.3657	2.98557	1.43409	2.49651	2.17857	1.79155	1.68426	2.40914	3.17555	2.10241	1.55606	2.35747	1.49117	1.86554	1.31408	1.36846	1.47779	1.32804	1.68426	1.21874	1.64056	1.73944	2.35747	1.34748	1.27568	3.00005	2.39111	1.43746	1.66612	1.55243	1.49117	1.32229	2.81909	2.3217	1.37143	1.62732	2.3217	2.3388	1.90117	1.51656	1.82	1.52721	2.67559	2.30414
AL021154.1	0	0	0	0.614125	0	0	0	0	0.259418	0	0.164238	0.378048	0.130873	0	0.647428	0.446302	0.155547	0.330099	0.198495	0.363123	0.241292	0	0	0.117879	0.172296	0.244965	0	0	0	0.171299	0.241112	0.229831	0.172496	0.139698	0.254979	0	0.161473	0.226969	0.293891	0.142766	0.23264	0.381041	0	0.115371	0.481333	0	0	0.186895	0
MDS2	0	0.175923	0.0416362	0.117784	0	0	0.241112	0.0737704	0.0465857	0	0.164238	0.0794373	0.0451138	0.0300284	0	0	0	0.12437	0	0	0	0	0	0.0333572	0.0601399	0	0	0.0585187	0	0.0625547	0.0455534	0	0.199298	0.167542	0	0	0.0508555	0.087163	0	0.0544015	0.0768486	0.160747	0	0.0262927	0	0.0416868	0	0.201099	0.0941273
AL445686.2	0.34213	0.138051	0.224267	0.546044	0.474193	0.188935	0.417036	0.117308	0.42758	0.353712	0.0947576	0.367291	0.169573	0.0601399	0	0.416059	0.133206	0.135025	0.180173	0.40122	0.209578	0.233204	0	0.403525	0.42715	0.154124	0.25455	0.443504	0.385301	0.156538	0.299636	0	0.107684	0.276623	0.279244	0.3164	0.102299	0.259131	0.338172	0.526036	0.115602	0.256343	0.19307	0.218975	0.153667	0.542698	0.237516	0.443504	0.139955
AL445471.2	0	0	0	0	0	0	0	0	0	0	0	0	0	0	0	0	0	0	0	0	0	0	0	0	0	0	0	0	0	0.0502553	0	0	0	0	0	0	0	0	0	0	0	0	0	0	0	0	0	0.0584458	0
AL050344.1	0	0	0	0	0	0	0	0	0	0	0	0	0	0	0	0	0	0	0	0	0	0	0	0	0	0	0	0	0	0	0	0	0	0	0	0	0	0	0	0	0	0	0	0	0	0	0	0	0
AL031432.3	0	0.138051	0.260446	0	0.296311	0	0	0	0.138539	0	0.367647	0.353712	0	0.19477	0.441409	0	0.143923	0	0.0849028	0	0.219437	0.216963	0	0.299933	0	0	0.406708	0	0.570994	0.412059	0	0.205824	0.161708	0.127692	0	0.298224	0.149829	0	0	0	0.514588	0.246214	0	0	0	0.588292	0.138884	0	0.169185
FO393419.2	0	0	0	0	0	0	0	0	0	0	0	0	0	0	0	0	0	0	0	0	0	0	0	0	0	0.154124	0	0	0	0	0	0	0	0	0	0	0	0	0	0	0	0	0	0.125109	0	0	0	0	0
LINC02574	0	0	0	0	0	0	0	0	0	0	0.164238	0	0	0.223807	0	0.468049	0	0	0	0	0	0	0	0	0	0	0	0	0	0	0.136637	0	0	0	0	0	0	0	0	0	0	0	0	0	0	0	0	0	0
AL353622.2	0	0	0	0.267469	0	0	0	0	0	0	0	0	0	0.126691	0	0	0	0	0	0	0	0.271455	0	0	0	0	0	0	0	0	0	0	0	0	0	0	0	0	0	0	0	0	0	0	0	0	0	0	0
LINC01715	0.131225	0.168112	0	0	0.713166	0.264267	0.231982	0.214589	0.590325	0	0	0.449354	0.157816	0.0508555	0.169573	0.416059	0.104088	0.394318	0.294179	0.483231	0.447449	0.301715	0.583516	0.322436	0.302542	0.164238	0.294179	0	0.435441	0.835098	0.45454	0.520021	0.117405	0.231676	0.362725	0	0.925756	0.632931	0.442982	0.491085	0.441409	0.296696	0.249202	0.336324	0	0.0976288	0.161246	0.213944	0.886004
AL360012.1	0	0	0	0	0	0	0	0	0	0	0	0	0	0	0	0	0	4.55173	0	0	0	0	6.50407	0	0	5.67411	0	0	0	0	0	0	0	0	0	0	0	0	0	0	0	0	0	0	0	0	0	0	4.14837
AL357500.1	0	0	0	0	0	0	0	0	0	0	0	0	0	0	0	0	0	0	0	0	0	0	0	0	0	0	0	0	0	0	0	0	0	0	0	0	0	0	0	0	0	0	0	0	0	0	0	0	0
LINC01756	0.0580408	0	0	0	0	0	0	0	0.0465857	0	0	0	0	0	0	0	0	0	0	0	0	0	0	0.0333572	0	0	0	0	0	0	0	0	0	0	0	0	0	0	0	0.036151	0	0	0	0	0	0	0	0	0
AC092265.1	0	0	0	0	0	0	0	0	0	0	0	0	0	0	0	0	0	0	0	0	0	0	0	0	0	0	0	0	0	0	0	0	0	0	0	0	0	0	0	0	0	0	0	0	0	0	0	0	0
LINC01648	0	0	0	0	0	0	0	0	0	0	0	0	0	0	0	0	0	0	0	0	0	0	0	0	0	0	0	0	0	0	0	0	0.0669142	0	0	0	0	0	0	0	0	0	0	0	0	0	0	0	0
AL137076.1	0	0	0	0	0	0	0	0	0	0	0	0	0	0	0	0	0	0	0	0	0	0	0	0	0	0	0	0	0	0	0	0	0	0	0	0	0	0	0	0	0	0	0	0	0	0	0	0	0
AL161638.2	0	0	0	0	0	0	0	0	0	0	0	0	0	0	0	0	0	0	0	0	0	0	0	0	0	0	0	0	0	0	0	0	0	0	0	0	0	0	0	0	0	0	0	0	0	0	0	0	0
AL137027.1	0	0	0	0	0	0	0	0	0	0	0	0	0	0	0	0	0	0	0	0	0	0	0	0	0	0	0	0	0	0	0	0	0	0	0	0	0	0	0	0	0	0	0	0	0	0	0	0	0
LINC01778	0	0.0565523	0	0	0.190473	0	0	0.0737704	0	0	0.0947576	0.232406	0	0.0300284	0.125818	0.0699367	0	0	0	0.0840091	0	0	0	0.0739641	0.157959	0	0.0607777	0	0	0.074768	0.0455534	0.0980296	0	0.167542	0	0.298224	0	0	0	0.0544015	0	0	0.0675734	0.0605955	0	0	0	0	0
AL354919.1	0	0	0.026965	0	0	0	0	0.0500885	0	0	0	0	0	0	0	0	0	0	0	0.0557975	0	0	0	0	0	0	0	0	0	0	0	0	0	0	0	0	0	0.0742301	0	0	0	0	0	0	0	0	0	0	0
AL136115.1	0.162355	0	0	0.353331	0	0	0	0.156336	0.129639	0	0	0	0.291848	0	0	0	0	0	0	0	0.115815	0	0	0.0983859	0	0.112899	0.370365	0	0	0	0	0	0	0	0	0	0	0	0.25397	0.117218	0	0.116056	0	0	0	0	0	0	0
AL109945.1	0.489912	0	0.0561975	0.146309	0	0	0.311183	0	0.278786	0	0.0831862	0	0.0699922	0.255284	0	0	0	0	0.186089	0.113929	0.0721797	0.129456	0	0	0	0	0	0.26567	0	0	0.0699367	0.133048	0	0.231676	0	0.19968	0	0.136733	0	0.142766	0	0.160747	0.30865	0.191846	0	0.0844284	0	0	0.107398
AL513327.3	0.179662	0.145904	0.353712	0.23674	0.425567	0.207007	0	0.302863	0.355765	0.447449	0	0.211772	0.34402	0	0	0.773835	0.155547	0	0.137522	0.187894	0.131225	0	0	0.216963	0.325289	0	0	0.166069	0	0.156538	0.223522	0	0.161708	0.139698	0.254979	0.3164	0.161473	0.38741	0	0.128965	0	0.484975	0.444505	0.218975	0	0.312666	0.138884	0.170445	0.185432
AL139286.2	0.235312	1.19928	0.750273	0.299172	0.395289	0	0.258855	0.214589	0.189109	0	0.367647	0.27046	0.444983	0.381855	0.339145	0.567303	0.205824	0.237715	0.174368	0.589654	0.827192	0	0	0.403525	0.594206	0.164238	0.567303	0.742685	0.44678	0.213785	0.440026	0.294478	0.222696	0.181745	0.807006	0	0.219951	0	0.701427	0.567303	0.514588	0.184631	0.23072	0.277605	0	0.770349	0.184029	0.552898	0
AL353604.1	0	0	0	0	0	0	0	0	0	0	0	0	0	0	0	0	0	0	0	0	0	0	0	0	0	0	0	0	0	0	0	0	0	0	0	0	0	0	0	0	0	0	0	0	0	0	0	0	0
AL139158.2	0	0	0	0	0	0	0	0.117308	0	0.190196	0.107146	0.154765	0.182234	0	0	0.114224	0	0	0	0	0.228665	0	0	0.155135	0	0.174187	0	0	0.143923	0	0.0895155	0.164238	0	0.195362	0	0	0.113783	0	0	0	0	0	0.127008	0.072017	0	0.113856	0	0	0.139955
LINC01343	0	0	0	0	0	0	0	0	0	0	0	0	0	0	0	0	0	0	0	0	0	0	0	0	0	0	0	0	0	0	0	0	0	0	0	0.119758	0	0	0	0	0	0	0	0	0	0	0	0	0
LINC01685	0	0	0	0	0	0	0	0	0	0	0	0	0	0	0	0	0	0	0	0	0	0	0	0	0	0	0	0	0	0	0	0	0	0	0	0	0	0	0	0	0	0	0	0	0	0	0	0	0
AC093151.3	0.162355	0	0.0907908	0.21113	0	0.170696	0	0	0.0994543	0	0	0	0.0847062	0	0.315215	0	0	0	0.128965	0	0	0	0	0	0.141664	0	0	0	0.170241	0.145026	0.263065	0.142101	0	0	0	0.266272	0.138884	0	0.229016	0.0889081	0	0.0886302	0.219951	0	0	0.381041	0	0	0
AC098484.2	0.489912	0	0.184421	0.167542	0.222696	0.280533	0.249202	0.117308	0.189109	0.179222	0.266011	0.378048	0.169573	0.255284	0	0.114224	0.434492	0.237715	0.107684	0.342451	0.172695	0	1.07264	0.539558	0.123	0.518755	0	0.218791	0.409572	0.299172	0.372331	0.152237	0.222696	0.348365	0.394804	0.3894	0.357678	0	0.293891	0.23674	0	0	0.386174	0.228841	0.35101	0.444505	0.0953538	0.125263	0.429875
SLC2A1-AS1	0.0735923	0.0565523	0.287311	0.108305	0.117042	0.0678785	0	0.101316	0.064601	0.119319	0.20052	0.0929584	0.0699922	0.16296	0.169573	0	0.0605955	0.0756927	0.0986464	0.113929	0.241292	0.216963	0	0.108409	0.123	0.0813551	0.118201	0.0442621	0.0544015	0.188388	0	0.0980296	0.0876759	0.0515669	0.161123	0	0.0916209	0.0996123	0.102299	0.0889081	0.0869166	0.212783	0.0675734	0.149118	0.187894	0.261859	0.0704447	0.0816648	0.289323
CYP4A22-AS1	0	0.0639811	0	0.126056	0.0841812	0	0	0	0	0	0.0711879	0.10704	0	0	0	0	0	0.0844284	0.0502827	0	0.146946	0	0	0.0860821	0.0841812	0	0	0	0	0	0	0	0	0	0	0	0	0	0	0.103693	0.23264	0	0.0754249	0.170445	0	0.113856	0	0	0.0811566
FOXD2-AS1	0.478752	0.341102	0.595611	0.252688	0.296311	0.228138	0.444505	0.241908	0.179964	0.425956	0.290394	0.154765	0.304254	0.537291	0.0985749	0.219159	0.367647	0.261164	0.673193	0.113929	0.374976	0.328666	0.36645	0.391623	0.096952	0.602581	0.242595	0.519388	0.170241	0.273856	0.263065	0.229831	0.256793	0.219437	0.303184	0.451568	0.252474	0.292212	0.0881516	0.2471	0.220691	0.31745	0.518051	0.361216	0.153667	0.187343	0.223522	0.696544	0.260191
LINC01738	0	0	0	0	0	0	0	0	0	0	0	0	0	0	0	0	0	0	0	0	0	0	0	0	0	0	0	0	0	0	0	0	0	0	0	0	0	0	0	0	0	0	0	0	0	0	0	0	0
AL691459.1	0.860899	1.10499	0.344317	0.507726	0.619757	0.543364	0.249202	0.650741	1.02621	0	0.356126	0.50418	0.444983	0.684251	0	1.20625	1.29467	0.463881	0.533679	0	0.59353	1.13069	0.609427	0.770349	1.08465	0.701427	0.458035	0.569388	0.962161	0.399005	0.493177	1.29211	0.827192	1.06097	1.00293	0.3894	0.357678	0.838991	0.86603	0.886004	0.778503	1.00815	1.18496	0.408389	0.762833	0.634585	1.0767	0	0.276182
AL356289.1	0	0	0	0	0	0	0	0	0	0	0	0	0	0	0	0	0	0.159604	0	0	0	0	0.154765	0	0	0	0	0	0	0	0	0	0	0	0	0	0	0	0	0	0	0	0	0	0	0	0	0	0
AL109659.1	0	0	0	0	0	0	0	0	0	0	0	0	0	0	0	0	0	0	0	0	0	0	0	0	0	0	0	0	0	0	0	0	0	0	0	0	0	0	0	0	0	0	0	0	0	0	0	0	0
LINC01562	0	0	0.026965	0	0.0538441	0.0937905	0	0	0	0	0.0502059	0	0.0299527	0	0.0985749	0.0614331	0	0	0.0456669	0.0703533	0	0	0.122371	0.046865	0	0	0.0406721	0.0821694	0	0	0.0790515	0	0.0669142	0	0	0.119758	0.0721797	0.136733	0	0.036151	0.0665708	0	0.0595464	0.0262927	0	0	0	0	0.069478
AL591167.1	0	0	0	0.252688	0	0	0.369494	0	0	0	0	0	0	0.115138	0	0	0	0	0	0	0	0	0	0	0.172296	0	0	0	0	0	0	0	0	0	0	0	0	0	0	0	0	0	0	0	0	0	0	0	0
LINC01771	0	0	0	0	0	0	0	0	0	0	0	0	0	0	0	0	0	0	0	0	0	0	0	0	0	0	0	0	0	0	0	0	0	0	0	0	0	0	0	0	0	0	0	0	0	0	0.111051	0	0
AC119428.1	0	0	0	0	0	0	0	0	0	0	0	0	0	0	0	0	0	0	0	0	0	0	0	0	0	0	0	0	0	0	0	0	0	0	0	0	0	0	0	0	0	0	0	0	0	0	0	0	0
AC119428.2	0	0.0639811	0	0	0.156224	0	0	0	0	0	0.0711879	0	0	0.0352676	0	0	0	0	0	0	0	0	0	0	0.0841812	0	0.264267	0.0821694	0	0	0	0	0	0	0	0	0	0.121937	0.0752674	0	0	0	0	0	0	0	0	0.0932692	0.0811566
AL035415.1	0	0	0	0	0	0	0	0	0	0	0	0	0	0	0	0	0	0	0	0	0	0	0	0	0	0	0	0	0	0	0	0	0	0	0	0	0	0	0	0	0	0	0	0	0	0	0	0	0
AC099796.1	0	0	0	0	0	0	0	0	0	0	0	0	0	0	0	0	0	0	0	0	0	0	0	0	0	0	0	0	0	0	0	0	0	0	0	0	0	0	0	0	0	0	0	0	0	0	0	0	0
MIR4422HG	0	0	0	0	0	0	0	0	0	0	0	0	0	0	0	0	0	0	0	0	0	0	0	0	0	0	0	0	0	0	0	0	0	0	0	0	0	0	0	0	0	0	0	0	0	0	0	0	0
AL603840.1	0	0	0	0	0	0.0563907	0	0	0	0	0	0	0	0	0	0	0	0	0	0.0557975	0	0	0	0.0293945	0.0479195	0	0	0	0.0544015	0	0	0	0	0	0	0	0	0	0	0	0	0	0	0.0230708	0	0	0	0	0
LINC01755	0	0	0	0	0.190473	0	0	0	0	0	0	0	0	0	0	0	0	0	0	0	0	0	0	0	0	0	0	0	0	0	0	0	0	0	0	0	0	0	0	0	0	0	0	0	0	0	0	0	0
LINC01753	0	0	0	0	0	0	0	0	0	0	0	0	0	0	0	0	0	0	0	0	0	0	0	0	0	0	0	0	0	0	0	0	0	0	0	0	0	0	0	0	0	0	0	0	0	0	0	0	0
AL353681.1	0	0	0	0	0	0	0	0	0	0	0	0	0	0	0	0	0	0	0	0	0	0	0	0	0	0	0	0	0	0	0	0	0	0	0	0	0	0	0	0	0	0	0	0	0	0	0	0	0
AC119674.1	0.235312	0.20052	0.326158	0.23674	0.381474	0.300474	0.520622	0.170837	0.138539	0.146148	0.247842	0.477213	0.0847062	0.240385	0.19968	0.0614331	0.424418	0.250508	0.294179	0.187894	0.131225	0	0.154765	0.0860821	0.238171	0	0.118201	0.0889081	0.0771978	0.0877553	0.145484	0.152237	0.0987503	0.0425379	0.0723851	0.280533	0.0621069	0.167156	0.186481	0.117218	0	0.101474	0.0849787	0.104715	0.153667	0.187343	0.0953538	0.236497	0.201814
LINC01767	0.458035	0.370365	0	0.736509	0.253687	0.674054	0.299933	0.783213	0.215716	0.378776	0.492711	0	0.277891	0.413436	0.214781	0.437043	0	1.14577	0.275007	0.152547	0.458598	0.478325	0.989509	0.0983859	0.473486	0.274116	0.791551	0.255284	0.582737	0.343722	0.424797	0.425567	0.734412	0.219437	0.528473	0.451568	0.31908	0	0.338172	0.905233	0.678689	0.116056	0.45454	0.253153	0.219716	0.381041	0.844363	0.876083	0.595611
AL390243.1	0	0	0	0	0	0	0	0	0	0	0	0	0	0	0	0	0	0	0	0	0	0	0	0.12744	0	0	0	0	0	0	0	0	0	0	0	0	0	0	0	0	0	0	0	0	0	0	0	0	0
AL445193.2	0	0	0	0	0.117042	0	0	0	0	0	0	0	0	0	0	0	0	0	0	0	0	0	0	0	0	0	0	0	0	0	0	0	0	0	0	0	0	0	0	0	0	0	0	0	0	0	0	0	0
LINC01135	0.131225	0.0565523	0.0996123	0.117784	0.0841812	0.207007	0.144781	0.0737704	0.148781	0	0.150203	0.211772	0.240208	0.223807	0.273605	0.23343	0.104088	0.0844284	0.128965	0.207007	0.0610902	0.249807	0.134235	0.299933	0.0721797	0.0813551	0.16439	0	0.130757	0.171299	0.126915	0.330421	0.0765726	0.356398	0	0.229304	0.197072	0	0.293891	0.0544015	0.220691	0.268886	0.0675734	0.149118	0.285304	0.397986	0.271455	0.125263	0.185432
AL136985.2	0.468049	0.300474	0.160052	0.340356	0.3581	0	0.17487	0	0.215716	0	0.122224	0.32676	0.193256	0.233204	0	0.446302	0.412059	0	0.0806179	0.152547	0.0990901	0.198081	0	0.333465	0.141664	0.364275	0.133364	0	0	0	0.273605	0.175756	0	0.484324	0.303184	0.266272	0.126691	0.568656	0.132626	0.280533	0.328341	0.212783	0	0.182563	0.568656	0.261859	0	0.139558	0.507726
AL136985.1	0	0	0	0	0	0	0	0	0	0	0	0	0	0	0	0	0	0	0	0	0	0	0	0	0	0	0	0	0	0	0	0	0	0	0	0	0	0	0	0	0	0	0	0	0	0	0.184029	0	0
AC105277.1	0.665101	0.618843	0.67583	1.07869	1.26016	1.61921	0.713166	1.82	1.1156	0.987799	1.19928	0.783213	0.918509	0.60694	0.893261	1.00128	0.635336	0.884523	0.275007	0.602581	1.04342	0.768143	0.768143	0.522946	1.47033	0.813211	1.11343	0.481778	1.0592	1.09081	0.299636	0.648297	1.0592	0.440486	1.20399	1.68426	1.08879	0.727251	0.989509	1.15455	0.546658	1.59545	0.706461	0.967147	1.51656	1.13291	0.758208	0.552898	1.12393
LINC01358	0.3096	0	0.447449	0	0	1.26792	0.432977	0.607818	0.179964	0.434018	0.177517	0.27046	0.227163	0	0.184421	0.219159	1.22634	0.477769	0.137522	0.242136	0.219437	0	0	0.274375	1.12848	0	1.04342	0.210736	0.561072	0.115687	0	0.142101	0.389041	1.20854	1.13491	0	0	0	0	0.867408	1.02621	0	0.202834	2.09589	0	2.0084	0.336657	0	0
AL592431.2	0	0	0	0	0	0	0	0	0	0	0	0	0	0	0	0	0	0	0	0	0	0	0	0	0	0	0	0	0	0	0	0	0	0	0	0	0	0	0	0	0	0	0	0	0	0	0	0	0
AL592431.1	0	0	0	0	0	0	0	0	0	0	0	0	0	0	0	0	0	0	0	0	0	0	0	0.226969	0	0	0	0	0	0	0	0	0	0	0	0	0	0	0	0	0	0	0	0	0	0	0	0	0
AC093424.1	0	0	0	0	0	0	0	0.286559	0	0	0.266011	0	0	0	0	0	0	0	0	0	0.386591	0	0	0	0	0	0	0	0.352313	0	0	0	0.52346	0.243559	0.233039	0.530416	0	0	0	0	0	0	0.30865	0	0	0.300474	0	0	0
AC097066.1	0	0	0	0	0	0	0	0	0	0	0	0	0	0	0	0	0	0	0	0	0	0	0	0	0	0	0	0	0	0	0	0	0	0	0	0	0	0	0	0	0	0	0	0	0	0	0	0	0
LINC01748	0	0.0395809	0.0416362	0	0	0.0678785	0	0.0737704	0	0.103103	0	0	0	0.0300284	0	0	0	0	0.0502827	0	0	0	0	0	0	0	0	0	0	0.102015	0	0	0	0	0	0	0	0.110616	0	0	0.0768486	0.0429953	0.049917	0	0	0	0	0	0
AC099792.1	0	0	0	0	0.0538441	0.0563907	0	0	0	0	0.0608666	0	0.0299527	0	0	0	0.0605955	0	0	0	0.038132	0.0847062	0	0	0	0	0	0	0.0863952	0.0502553	0	0	0	0.0349649	0.0353593	0	0	0	0.0428617	0.036151	0	0	0	0	0	0.0337191	0.0362386	0	0.0941273
LINC01739	0	0	0	0	0	0	0	0	0	0	0	0	0	0	0	0	0	0	0	0	0	0	0	0	0	0	0	0	0	0	0	0	0	0	0	0	0	0	0	0	0	0	0	0	0	0	0	0	0
AL162400.1	0	0	0	0	0	0	0	0	0	0	0	0	0	0	0	0	0	0	0	0	0	0	0	0	0	0	0	0	0	0	0	0	0	0	0	0	0	0	0	0	0	0	0	0	0	0	0	0	0
AL162400.2	0	0	0	0	0	0	0	0	0	0	0	0	0	0	0	0	0	0	0	0	0	0	0	0	0	0	0	0	0	0	0	0	0	0	0	0	0	0	0	0	0	0	0	0	0	0	0	0	0
AC096543.2	0	0	0	0	0	0	0	0	0	0	0	0	0	0	0	0	0	0.0942899	0	0	0	0	0	0	0	0	0	0	0	0	0	0	0	0	0	0	0	0	0	0	0	0	0	0	0	0	0	0	0
AL357078.3	0.38976	0.245663	0.280006	0.299172	0.117042	0.264267	0.144781	0.302863	0.179964	0.434018	0.0947576	0	0.304254	0.395688	0	0.114224	0.270989	0.639722	0.268078	0	0.161578	0	0.198802	0.208386	0.224402	0.232406	0	0	0	0.452689	0.223522	0.264267	0.117405	0.338483	0	0	0.197072	0.374976	0	0.167397	0.144911	0	0.114581	0.072017	0.454111	0.312666	0.597035	0.292575	0.232873
AL357078.1	0	0.323983	0	0	0	0.425567	0	0	0	0	0	0	0	0	0	0	0.317124	0	0	0	0	0	0	0.438613	0	0.258353	0	0	0	0.327374	0	0	0	0	0	0	0	0	0.310471	0.280533	0	0.268886	0	0	0	0	0	0	0
LINC01702	0	0	0	0	0	0	0	0	0	0	0	0	0	0	0	0	0	0	0	0	0	0	0	0	0	0	0	0	0	0	0	0	0	0	0	0	0	0	0.186481	0	0	0	0	0	0	0	0	0	0
LINC01707	0	0	0	0	0	0	0	0	0	0	0	0	0	0	0	0	0	0	0	0	0	0	0	0	0	0	0	0	0	0	0	0	0	0	0	0	0	0	0	0	0	0	0	0	0	0	0	0	0
AL512271.1	0	0	0	0	0	0	0	0	0	0	0	0	0	0	0	0	0	0	0	0	0	0	0	0	0	0	0	0	0	0	0	0	0	0	0	0	0	0	0	0	0	0	0	0	0	0	0	0	0
LINC01758	0	0	0	0	0	0	0	0	0.148781	0	0	0	0	0	0	0	0	0	0	0	0	0	0	0	0	0	0	0	0	0	0	0	0	0	0	0	0	0	0	0	0	0	0	0	0	0	0	0	0
AL354872.2	1.32516	1.26527	0.750273	1.34184	1.53407	0.812003	1.34184	0.554821	1.64512	1.43746	0.686104	0.980715	0.965457	0.450418	0.273605	1.10919	1.73476	1.21599	1.05334	0.724226	2.3217	2.09589	0.683297	0.403525	0.686104	0.453267	0.550858	1.03174	0.479781	0.560328	1.35341	0.540795	0.30865	0.583516	0.807006	0.738556	0.402586	4.63035	0.419196	0.905233	1.18706	0.256343	0.774983	0.845782	1.28956	1.31688	1.71172	1.58753	1.01533
LINC01788	0	0.0395809	0	0	0	0	0	0.0874334	0.0730065	0	0.0831862	0	0	0.0227751	0.0985749	0.0799794	0	0	0.0553528	0.0840091	0.0721797	0.0946503	0	0.0552087	0.0721797	0	0	0	0.130757	0.0877553	0	0	0	0	0	0	0.0508555	0.087163	0.0428617	0.036151	0.0665708	0.035029	0.049917	0	0	0.0416868	0.0437526	0.0695902	0
AL513285.1	0	0	0	0	0	0	0	0	0	0	0	0	0	0	0	0	0	0	0	0	0	0	0	0	0	0	0	0	0	0	0	0	0	0	0	0	0	0	0	0	0	0	0	0	0	0	0	0	0
AL583808.1	0	0	0	0	0	0	0	0	0	0	0	0	0	0	0	0	0	0	0	0	0	0	0	0	0	0	0	0	0	0	0	0	0	0	0	0	0	0	0	0	0	0	0	0	0	0	0	0	0
AL583808.2	0	0	0	0	0	0	0	0	0	0	0	0	0	0	0	0	0	0	0	0	0	0	0	0	0	0	0	0	0	0	0	0	0	0	0	0	0	0	0	0	0	0	0	0	0	0	0	0	0
LINC01360	0	0	0	0	0	0	0	0	0	0.0850772	0	0	0	0	0	0	0	0	0	0	0	0	0	0	0	0	0	0	0	0	0	0	0	0	0	0	0	0	0	0	0	0	0	0	0	0	0	0	0
LINC02238	0	0	0	0	0	0	0	0	0	0	0	0	0	0	0	0	0	0	0	0	0	0	0	0	0	0	0	0	0	0	0	0	0	0	0	0	0	0	0	0	0	0	0	0	0	0	0	0	0
AC135803.1	1.99507	2.23959	1.61542	1.14124	1.73476	1.77192	1.67971	2.58798	1.39882	3.54582	1.44373	0.791551	2.95467	1.55997	0.835098	3.17555	1.10499	1.22391	1.97059	1.10499	0.682343	2.84667	1.51656	1.10079	1.55997	0.971885	1.90117	1.13069	1.76251	0.800055	2.50603	1.59545	0.900721	2.50603	1.39246	0	0.843035	1.67019	1.44373	1.65321	1.63601	1.35035	1.98889	1.53744	2.61062	1.26016	1.01712	0.673193	1.25501
AC133865.1	0	0	0	0	0	0	0	0	0	0	0	0	0	0	0	0	0	0	0	0	0	0	0	0	0	0	0	0	0	0	0	0	0	0	0	0	0	0	0	0	0	0	0	0	0	0	0	0	0
AC099786.3	0	0	0	0	0	0	0	0	0	0	0	0	0	0	0	0	0	0	0	0	0	0	0	0	0	0	0	0	0	0	0	0	0	0	0	0	0	0	0	0	0	0	0	0	0	0	0	0	0
AC092813.1	0	0	0	0	0	0	0	0	0	0	0	0	0	0	0	0	0	0	0	0	0	0	0	0	0	0	0	0	0	0	0	0	0	0	0	0	0	0	0	0	0	0	0	0	0	0	0	0	0
AC104458.1	0	0	0	0	0	0	0	0	0	0	0	0	0	0	0.285621	0	0	0	0	0	0	0	0	0	0	0	0	0	0	0	0	0	0	0	0	0	0	0	0	0	0	0	0	0	0	0	0	0	0
LINC02567	0	0	0	0	0	0	0	0	0	0	0	0	0	0	0	0	0	0	0	0	0	0	0	0	0	0	0	0	0	0	0	0	0	0	0	0	0	0	0	0	0	0	0	0	0	0	0	0	0
AL353651.1	0	0	0	0	0	0	0	0	0	0	0	0	0	0	0	0	0	0	0	0	0	0	0	0	0	0	0	0	0	0	0	0	0	0	0	0	0	0	0	0	0	0	0	0	0	0	0	0	0
AL606519.1	0	0	0.072017	0	0	0	0	0	0	0	0	0	0	0	0	0	0	0	0	0	0	0	0	0	0	0	0	0	0	0	0	0	0	0	0	0	0	0	0	0	0	0	0	0	0	0	0	0	0
AL136234.1	0	0	0	0	0	0	0	0	0	0	0	0	0	0	0	0	0	0	0	0	0	0	0	0	0	0	0	0	0	0	0	0	0	0	0	0	0	0	0	0	0	0	0	0	0	0	0	0	0
AL157944.1	0	0	0	0	0	0	0	0	0	0	0	0	0	0	0	0	0	0	0	0	0	0	0	0	0	0	0	0	0	0	0	0	0	0	0	0	0	0	0	0	0	0	0	0	0	0	0	0	0
LINC01362	0	0	0	0	0	0	0	0	0	0	0	0	0	0	0	0	0	0	0	0	0	0	0	0	0	0	0	0	0	0	0	0	0	0	0	0	0	0	0	0	0	0	0	0	0	0	0	0	0
LINC01361	0.0921472	0	0.125699	0	0.0699922	0.0678785	0	0	0.179964	0	0.0502059	0	0.169573	0.0601399	0	0.0799794	0.104088	0.0667603	0	0	0	0.0847062	0	0.0333572	0	0	0	0	0.117784	0.0877553	0	0	0.0669142	0.0425379	0.0428617	0.21417	0	0	0.0541223	0	0	0	0	0.0308068	0.117308	0.1433	0.0953538	0	0
LINC01712	0	0	0	0	0	0	0	0	0	0	0	0	0	0	0	0	0	0	0	0	0	0	0	0	0	0	0	0	0	0	0	0	0	0.0734772	0	0	0	0	0	0	0	0	0	0	0	0	0	0.0816648	0
LINC01725	0.162355	0.234604	0.166369	0.0798836	0.607818	0.152547	0.285853	0.419196	0.307023	0.214781	0.394804	0.304867	0.381855	0.348056	0.169573	0.763987	0.263065	0.380608	0.0553528	0.530416	0.241292	0	0.498243	0.108409	0.108513	0.258353	0.567303	0.0743268	0.45916	0.466937	0.273605	0.0789544	0.540795	0.473486	0.918509	0.172296	0.31908	0.481778	0.293891	0.23674	0.514588	0.0886302	0.406708	0.31908	0.187894	0.1433	0.184029	0.201099	0.507726
AL035706.1	0	0	0	0	0	0	0	0	0	0	0	0	0	0.0508555	0	0	0	0	0	0	0	0	0	0.064504	0	0	0	0	0	0	0	0	0	0	0	0	0	0	0	0	0	0	0.0944701	0.0605955	0	0	0	0	0
AL359504.2	0.744918	0.805807	2.19268	0.59353	0.743689	0.734412	0.625413	0.273354	1.15455	1.3446	0.605412	0.737517	0.469764	0.835098	0.32676	0.71909	1.02274	0.50971	0.908028	0.293349	0.468649	0.656768	0.531704	0.616453	0.777363	0.668546	0.76624	0.887458	0.514588	0.412059	0.941402	0.648297	0.661331	0.673193	0.568656	0.639722	0.903833	0.754772	0.52482	0.512306	0.562504	0.849766	0.563902	0.636086	1.1156	0.792692	0.473486	0.592736	0.495317
LINC01555	0	0	0	0	0	0	0	0	0	0	0	0	0	0	0	0	0	0	0	0	0	0	0	0	0	0	0	0.0504427	0	0	0	0	0	0	0	0	0	0	0	0	0	0	0	0	0	0.0337191	0	0	0
AC092807.2	0	0	0.498243	0.752414	0	0.70552	0.744918	0	0.480383	0	0	0	0	0	0.909423	0	0.554821	0.639722	0	0	0	0	0	0.963809	0	0	0	0	0	0.584295	0	0	0	0	0	0	0	0	0.543364	0.481778	0	0.475561	0	0	0	0	0.501819	0	0.632931
AC092807.1	0	0	0	0	0	0	0	0	0	0	0	0.565274	0	0	0	0	0	0	0	0	0	0	0	0	0	0	0	0	0	0	0	0	0	0	0	0	0	0	0	0	0	0	0	0	0	0	0	0	0
LINC01140	1.37439	1.84555	2.92872	0.836394	0.527747	0.70552	0.700411	0.813211	1.38694	0.936734	1.34748	0.644778	1.03372	1.91314	1.64512	1.0646	1.62732	0.67583	1.32229	0.808206	0.973613	1.57197	1.28112	1.11768	1.18037	2.16443	1.01907	1.53407	1.90117	1.19436	1.99507	1.07264	0.855034	1.11343	1.02621	1.30317	0.925756	1.08465	1.39246	0.829722	1.08061	1.02274	0.874687	1.59149	0.973613	1.19188	1.16614	2.65363	1.93636
LINC01364	0	0	0	0	0	0.0937905	0	0	0	0	0	0	0	0.0707	0	0.0799794	0	0	0	0	0	0	0	0	0	0	0	0	0	0	0	0	0	0	0	0	0	0	0	0	0	0	0	0	0	0.129128	0	0	0
AC099568.2	0.540795	0.266534	0.603361	0.267469	0.253687	0.506061	0.126915	0.403056	0.0899951	0	0.276182	0.565274	0.0699922	0.419196	0.394804	0.456519	0.295672	0.194046	0.389041	0.460718	0.198288	0.458035	0.70552	0.495852	0.188935	0.549466	0.181119	0.187894	0.352313	0.800055	0.247329	0	0.650741	0.759484	0.382237	0.466424	0.592736	0.226969	0.310471	0.552898	0.23264	0.541391	0.531704	0.353331	1.06274	0.348056	0.292575	0.407238	0.350042
AL391497.1	0.255892	0.109872	0	0	0	0	0	0	0.119629	0	0	0.17368	0	0.223807	0	0	0	0	0	0	0	0.178386	0.232873	0	0.141664	0	0	0	0	0	0	0	0	0.114837	0	0	0.126691	0.184948	0	0	0	0.101474	0	0	0	0	0	0	0
AC092783.1	0	0	0	0	0	0	0	0	0	0	0	0	0	0	0	0	0	0	0	0	0	0	0	0	0	0	0	0	0	0	0	0	0	0	0	0	0	0	0	0	0	0	0	0	0	0	0	0	0
LINC01763	0	0	0	0.180173	0	0	0	0	0	0	0	0	0	0	0	0	0	0	0	0	0	0	0	0	0	0	0	0	0	0	0	0	0	0	0	0	0	0	0	0	0	0	0	0	0	0	0	0	0
AC091614.1	0	0	0	0	0	0	0	0	0	0	0.0711879	0	0.0558893	0	0	0	0	0	0	0	0	0	0	0	0	0	0	0	0	0	0	0	0	0	0	0	0	0	0	0.0653709	0	0	0	0	0	0	0	0	0
AC104836.1	0.140425	0.129238	0.267194	0.108305	0.137099	0.08151	0.19477	0.241908	0	0	0.0502059	0.0929584	0.102666	0.142766	0.116056	0.0614331	0.218662	0.349747	0.268078	0.152547	0.209578	0.342451	0	0	0	0.0973112	0.0934571	0.166069	0.105873	0.130446	0.0398842	0.123774	0	0.181745	0.161123	0.145141	0.113783	0	0.161246	0.0451138	0.0869166	0.233204	0.0849787	0.115371	0.117308	0	0.138884	0.0816648	0.139955
AC097059.1	0	0	0	0	0	0	0	0	0	0	0	0	0.117983	0	0	0	0	0	0	0	0	0	0	0	0	0.125759	0	0	0	0	0	0	0	0	0	0	0.149829	0	0.27978	0	0	0.130815	0.163601	0	0	0	0	0	0
AC097059.2	0.131225	0	0.072017	0	0	0	0	0	0	0.190196	0	0	0	0	0	0	0	0	0	0	0	0.159604	0.198802	0	0	0	0	0	0.130757	0	0	0.152237	0	0	0	0	0	0.167156	0.19989	0	0	0.101474	0	0.072017	0	0	0.184029	0	0
AC093117.1	0.0735923	0	0	0	0	0	0	0	0	0	0	0	0	0	0	0	0	0	0.0553528	0	0	0	0	0	0	0	0	0	0	0	0	0	0	0	0	0	0	0	0	0	0	0	0	0.0262927	0	0	0	0	0
LINC01760	0	0	0	0	0	0	0	0	0	0	0	0	0	0	0	0	0	0	0	0	0	0	0	0	0	0	0	0	0	0	0	0	0	0	0	0	0	0	0	0	0	0	0	0	0	0	0	0	0
LINC01650	0	0	0	0	0	0	0	0	0	0	0	0	0	0	0	0	0	0	0	0	0	0	0	0	0	0	0	0	0	0	0	0	0	0	0	0	0	0	0	0	0	0	0	0	0	0	0	0	0
AL445218.1	0	0	0	0	0	0	0	0	0	0	0	0	0	0	0	0	0	0	0	0	0	0	0	0	0	0	0	0	0	0	0	0	0	0	0	0	0	0	0	0	0	0	0	0	0	0	0	0	0
AL683887.1	0	0	0	0	0	0	0	0	0	0	0	0	0	0	0	0	0	0	0	0	0	0	0	0	0	0	0	0	0	0	0	0	0	0	0	0	0	0	0	0	0	0	0	0	0	0	0	0	0
AC099566.1	0	0	0	0	0	0	0	0	0	0	0	0	0	0	0	0	0	0	0	0	0	0	0	0	0	0	0	0	0	0	0	0	0	0	0	0	0	0	0	0	0	0	0	0	0	0.278482	0	0	0
LINC01787	0	0	0	0	0	0	0	0	0	0	0	0	0	0	0	0	0	0	0	0	0	0	0	0	0	0	0	0	0	0	0	0	0	0	0	0	0	0	0	0	0	0	0	0	0	0	0.0437526	0	0
MIR137HG	0	0.0489065	0	0	0.0538441	0	0	0.0500885	0	0	0	0	0.0451138	0.0227751	0	0.0699367	0	0	0	0	0	0	0.0991511	0	0	0.0566978	0.0406721	0	0.0863952	0	0.0612724	0	0	0	0.0617796	0.119758	0	0	0	0	0.0665708	0	0	0.036151	0	0	0	0	0
BX005019.1	0	0	0	0	0	0	0	0.0618092	0	0	0	0	0	0	0	0	0	0	0	0	0	0	0	0.0333572	0	0.0386052	0	0	0	0	0.0328534	0	0	0	0	0	0	0	0	0	0	0	0	0	0	0	0	0	0
LINC01776	0	0.0395809	0	0	0	0	0	0.0500885	0	0	0	0	0	0	0	0	0	0	0	0	0	0	0	0	0	0	0	0	0	0	0	0	0	0	0	0	0	0	0	0	0	0	0	0	0	0	0	0	0
LINC01708	0	0	0	0	0	0	0	0	0	0	0	0	0	0	0	0	0	0	0	0	0	0	0	0	0	0	0	0	0	0	0	0	0	0	0	0	0	0	0	0	0	0	0	0	0	0	0	0	0
RTCA-AS1	0.209373	0.307633	0.738556	0.86603	0.812003	0.629741	0.231982	0.748197	0	0.706461	0.481333	0.232406	0.406708	0.126691	0.731322	0.637007	0.462889	0.215268	0.673193	0.40122	0.274375	0.478325	0.573175	0.654258	0.947964	0.518755	0.358869	0.363874	0.561072	0.637927	0.145484	0.648297	0.364275	0.673193	0.832366	0.622802	0.186224	0	0.853676	0.394804	0.462889	0.434966	0.37599	0.125109	0.787916	0.833803	0.161246	0.201099	0
LINC01349	0	0	0	0	0	0	0	0	0	0	0	0	0	0	0	0	0	0	0	0	0	0	0	0	0	0	0	0	0	0	0	0	0	0	0	0	0	0	0	0	0	0	0	0	0	0	0	0	0
LINC01307	0	0	0	0	0	0	0	0	0	0	0	0	0.0558893	0	0	0	0	0	0	0	0	0	0	0	0	0	0	0	0	0	0	0	0	0	0	0	0	0	0	0	0	0	0	0	0	0	0	0	0
LINC01709	0	0	0	0	0	0	0	0	0	0	0	0	0	0	0	0	0	0	0	0	0	0	0	0	0	0	0	0	0	0	0	0	0	0	0	0	0	0	0	0	0	0	0	0	0	0	0	0	0
AC114485.1	0	0	0	0	0	0	0	0	0	0	0	0	0	0	0	0	0	0	0	0	0	0	0	0	0	0	0	0	0	0	0	0	0	0	0	0	0	0	0	0	0	0	0	0	0	0	0	0	0
AC099567.1	0	0	0	0	0	0	0	0	0	0	0	0	0	0	0	0	0	0	0	0	0	0	0	0	0	0	0	0	0	0	0	0	0	0	0	0	0	0	0	0	0	0	0	0	0	0	0	0	0
AC095032.2	0	0	0	0	0	0	0	0	0	0	0	0	0	0	0	0	0	0	0	0	0	0	0	0	0	0	0	0	0	0	0	0	0	0	0	0	0	0	0	0	0	0	0	0	0	0	0	0	0
LINC01676	0	0	0	0	0	0	0	0	0	0	0	0	0	0	0	0	0	0	0	0.225009	0	0	0	0	0	0	0	0	0	0	0	0	0	0	0	0	0	0	0	0	0	0	0	0	0	0.202175	0	0	0
LINC01677	0	0	0	0	0	0	0	0	0	0	0	0	0	0	0	0	0	0	0	0	0	0	0	0	0	0	0	0	0	0	0	0	0	0	0	0	0	0	0	0	0	0	0	0	0	0	0	0	0
AL355306.2	0	0	0	0	0	0	0	0	0	0	0	0	0	0	0	0	0	0	0	0	0	0	0	0	0	0	0	0	0	0	0	0	0	0	0	0	0	0	0	0	0	0	0	0	0	0	0	0	0
LINC01661	0	0	0	0	0	0	0	0	0	0	0	0	0	0	0	0	0	0	0	0	0	0	0	0	0	0	0	0	0	0	0	0	0	0	0	0	0	0	0	0	0	0	0	0	0	0	0	0	0
AL390036.1	0	0	0	0	0	0.440026	0	0	0	0	0	0	0	0	0	0	0.181428	0	0	0	0	0	0	0	0.363874	0.154124	0	0	0	0	0	0	0	0	0	0	0	0	0	0	0	0	0	0.125109	0	0	0	0	0
AL359258.1	0	0	0	0	0	0	0	0	0	0	0	0	0	0.0227751	0	0	0	0	0.0383504	0	0	0	0	0	0	0	0.0406721	0	0	0	0.0328534	0	0	0.0349649	0.0353593	0	0.0420575	0	0	0	0	0.035029	0.0409732	0.0230708	0	0	0	0	0
AL390038.1	0	0	0	0	0	0	0	0	0	0	0	0	0	0.0227751	0	0	0	0	0.0383504	0	0	0	0	0	0	0	0.0406721	0	0	0	0.0328534	0	0	0.0349649	0.0353593	0	0.0420575	0	0	0	0	0.035029	0.0409732	0.0230708	0	0	0	0	0
AL356488.2	0	2.43752	1.92485	0	2.3217	0	1.47406	0	0	1.49117	0.770349	0.581424	0	0	0	0	0	0	0	0	0	0	0	0.718049	1.12848	2.42791	0	0	0	0	1.06646	0	0	0	0	0	0	1.65763	0	0	0	0	0	0	2.35747	0	0	0	0
LINC01768	0	0	0	0	0	0	0	0	0	0	0	0	0	0	0	0	0	0	0	0	0	0	0	0	0	0	0	0	0	0	0	0	0	0	0	0	0	0	0	0	0	0	0	0	0	0	0	0	0
AL450468.2	0	0	0	0	0	0	0	0	0	0	0	0	0	0	0	0.0528177	0	0	0	0	0	0	0	0	0	0	0	0	0	0	0	0	0	0.0425379	0	0	0	0	0	0	0.0665708	0	0	0	0	0	0	0	0
CYMP-AS1	0	0	0	0	0	0	0.0922865	0	0	0	0	0	0.0451138	0	0	0	0	0	0	0	0	0	0	0	0.0479195	0	0.0406721	0	0.105873	0.0502553	0	0	0	0	0.0521681	0	0	0.0742301	0	0	0	0	0	0.0504427	0	0	0.0362386	0	0
AL365361.1	0.235312	0.266534	0.25397	0.167542	0.137099	0.0937905	0.223237	0.0874334	0.0994543	0.25426	0.164238	0.17368	0.117983	0.278786	0.125818	0.190196	0.181428	0.135025	0.149278	0.0703533	0.146946	0.216963	0.0895155	0.19968	0.123	0.195162	0.181119	0.244208	0.194214	0.130446	0.273605	0.175756	0.199298	0.139698	0.12744	0.280533	0.232194	0.121937	0.148561	0.117218	0.134888	0.352631	0.173244	0.379738	0.153667	0.113856	0.138884	0.170445	0.232873
LINC01160	0.40122	0.315768	0.52414	0.614125	0.26839	0.207007	0	0.286559	0.25003	0.239765	0.346259	0.211772	0.26533	0.50065	0.295672	0.165961	0.317124	0.43648	0.613204	0.130873	0.257293	0.538104	0.498243	0.413436	0.48928	0.347049	0.346259	0.608696	0.798692	0.188388	0.145484	0.284987	0.107684	0.0734772	0.727251	0.3894	0.293891	0.550162	0.326487	0.142766	0.546658	0.233204	0.352631	0.361216	0.401715	0.0844284	0.304254	0.49647	0
LINC01750	0.801418	0.52414	0.532361	0.561816	0.343247	0.280533	0.463881	0.482224	0.129639	0.611655	1.0592	0.551606	0.602581	0.835098	0.47622	0.637007	0.317124	0.718049	0.34549	0.326487	0.913907	1.01354	0.461272	0.678689	0.550858	0.652502	0.358869	0.801418	0.352313	0.863413	0.478325	0.960524	0.364275	0.673193	0.325559	0.3894	0.579348	1.0767	0.604777	0.630581	1.01533	0.246214	0.706461	0.392465	0.285304	0.171898	0.608696	0.896278	0.260191
LINC01356	0.0580408	0	0.0303587	0.23674	0	0	0	0	0.0899951	0	0	0	0	0.0300284	0	0.256083	0.0698812	0.105125	0.257293	0	0	0	0	0	0	0	0.0934571	0	0	0	0	0	0.0987503	0	0	0	0	0	0.148561	0.0763144	0.0768486	0	0	0.0504427	0.102924	0.0844284	0	0	0.0941273
AL357055.3	0.0826448	0.0730557	0.0416362	0.0890443	0.117042	0.0937905	0.0922865	0.137369	0.0813551	0.146148	0.0608666	0	0.0451138	0.0258953	0.0985749	0.101116	0.0698812	0.169467	0.149278	0.130873	0.038132	0.0847062	0.0991511	0.046865	0.0721797	0.0813551	0.10493	0.0504427	0.095252	0.0502553	0.0895155	0.114581	0.0987503	0.114837	0.0986464	0.185946	0.0721797	0.151365	0.0752674	0.0653709	0.0869166	0.0429953	0.104088	0.0844284	0.141362	0.0976288	0.0824789	0.0816648	0.139955
AL121999.1	0	0	0	0	0	0	0	0	0	0	0	0	0	0	0	0	0	0	0	0	0	0	0	0	0	0	0	0	0	0	0	0	0	0	0	0	0	0	0	0	0	0	0	0	0	0	0	0	0
LINC01649	0	0.0907908	0	0.108305	0	0.08151	0	0.0618092	0.0813551	0	0	0	0.0558893	0	0	0	0.0810574	0.0667603	0	0	0	0	0	0.0401039	0	0.0813551	0	0	0	0.0625547	0	0.152237	0.117405	0.0734772	0	0	0	0.167156	0.0881516	0.0451138	0	0.0763144	0.0595464	0.0504427	0	0.052235	0.0437526	0	0.0941273
LINC01779	0.0921472	0	0	0	0.0841812	0.248333	0	0	0	0	0	0	0.145262	0	0	0.0799794	0	0	0	0.0976288	0.0610902	0.178386	0	0.0983859	0	0.0464287	0	0	0.0863952	0	0	0.105873	0	0.0615802	0.0617796	0	0.113783	0	0.0752674	0	0	0	0	0	0	0	0.0607777	0	0
AL136376.1	0	0	0	0	0	0	0	0	0	0	0	0	0	0	0	0	0	0	0	0	0	0	0	0	0	0	0	0	0	0	0	0	0	0	0	0	0	0	0	0	0	0	0	0	0	0	0	0	0
AL390066.1	0.860899	0.864722	1.36242	0.532361	0.410044	0.734412	0.406178	0.443504	0.473073	0.353712	0.5876	0.490544	0.554821	0.82587	0.339145	0.416059	0.635336	0.43648	0.798692	0.187894	0.458598	0.49647	0.328341	0.479179	0.594206	0.32676	0.406708	0.635336	0.435441	0.327374	0.532361	0.582737	0.441872	0.598522	0.444027	0.466424	0.368002	0.632931	0.516786	0.465841	0.473073	0.92287	0.82587	0.627131	0.594882	0.381041	0.698474	0.635336	0.648297
C1orf137	0	0	0	0	0	0	0	0	0	0	0	0	0	0	0	0	0	0	0	0	0	0	0	0	0	0	0	0	0	0	0	0	0	0	0	0	0	0	0	0	0	0	0	0	0	0	0	0	0
AL157904.1	0.62124	0.370365	0.287311	0.311594	0	0	0.285853	0.419196	0.493644	0.378776	0.213199	0.285853	0	0.285304	0	0	0	0.261164	0.107684	0.970361	0.320776	0.565936	0	0.155135	0.25426	0.174187	0	0.236106	0.267469	0	0	0	0.776173	0.356398	0.182921	0	0.402586	0.534245	0.568656	0.178386	0.319829	0.184631	0.249202	0	0.369494	0.472183	0.197508	0.417036	0
LINC01525	0	0	0	0	0	0	0	0	0	0	0	0	0	0	0	0	0	0	0	0	0	0	0	0	0	0	0	0	0	0	0	0	0.153295	0	0	0	0	0	0	0	0	0	0	0	0	0	0	0	0
AL358072.1	0.514588	0.569388	0.595611	0.180173	0.584295	0.531046	0.56662	0.227542	0.551606	1.30022	0.367647	0.50418	0.744918	0.333096	0.485625	0.735502	0.452112	0.835098	0.42801	0.383198	0.654258	0.444983	0.36645	0.373191	0.339495	0	0.316762	0.704451	0.702405	0.728273	0.738556	0.815635	0.568656	0.366012	0.568656	0.419196	1.04153	0.167156	0.213413	0.50065	0.514588	0.360777	0.723248	0.379738	0.201975	0.654973	0.369156	0.236497	0.244208
AL139420.1	0	0.0907908	0.0643588	0	0	0	0	0	0	0	0	0	0	0	0	0	0	0	0	0	0	0	0	0	0	0	0	0	0	0	0	0	0	0	0	0	0	0	0	0	0	0	0	0	0	0	0	0	0
AL359915.1	0	0	0	0	0	0	0	0	0	0	0	0	0	0	0	0	0	0	0	0	0	0	0	0	0	0	0	0	0	0	0	0	0	0.0615802	0	0	0	0	0	0	0	0	0	0	0	0	0	0	0
LINC01780	0	0	0	0	0	0	0	0	0	0	0	0	0	0.115138	0	0	0	0	0	0	0	0	0	0	0	0	0	0	0	0	0	0	0	0	0	0	0	0	0	0	0	0	0	0	0	0	0	0	0
AC245008.1	0	0.138051	0	0	0.173082	0.207007	0	0	0.243376	0	0	0	0.227163	0.178919	0	0	0	0.276623	0.409206	0	0.131225	0	0	0	0	0.031098	0	0	0	0	0	0	0	0	0	0	0	0.521828	0.148561	0	0.452689	0	0.24003	0	0.267469	0.15674	0.138884	0.292575	0
AC244453.1	0	0	0	0	0	0	0	0	0	0	0.137099	0	0	0	0	0	0	0	0	0	0.115815	0	0	0	0.157959	0	0	0	0	0	0	0	0.153295	0.0734772	0	0	0	0	0	0	0	0	0	0	0	0	0	0.281781	0
AC244021.1	0.0503764	0.0489065	0.0643588	0.0798836	0.0538441	0	0.117503	0.0500885	0.0388806	0.168112	0.0502059	0	0.0368208	0.0258953	0.089104	0.0614331	0.0413799	0.0844284	0.0383504	0.0703533	0.038132	0.0631919	0.0895155	0.046865	0.0479195	0.031098	0.0607777	0	0.0863952	0.0502553	0.0328534	0.123774	0	0.0349649	0.0428617	0.107563	0.0916209	0.0742301	0.0541223	0.0544015	0.0869166	0.035029	0.049917	0.0605955	0	0.0416868	0.0437526	0	0.069478
AL592494.1	0	0	0	0	0	0	0	0	0	0	0	0	0	0.247329	0	0	0	0	0	0	0	0	0	0	0	0	0	0	0	0	0	0	0	0	0	0	0	0	0	0	0	0.268886	0	0	0	0	0	0	0
LINC01691	0	0	0	0	0	0	0	0	0	0	0	0	0	0	0	0	0	0	0	0	0	0	0	0	0	0	0	0	0	0	0	0	0	0	0	0	0	0	0	0	0	0	0	0	0	0	0	0	0
AC239859.3	0	0	0	0	0	0	0	0	0	0	0	0	0	0	0	0	0	0.226334	0	0	0	0	0	0	0	0	0	0	0	0	0	0.0896522	0	0	0	0	0	0	0	0	0	0	0	0	0	0	0	0	0
AC239800.2	0.266534	0.224267	0.177617	0.108305	0.296311	0.300474	0.271674	0.257865	0.148781	0.239765	0.137099	0.154765	0.215476	0.171139	0.243884	0.219159	0.338172	0.304023	0.113712	0.187894	0.115815	0.159604	0.277891	0.237516	0.172296	0.258353	0.316762	0.386174	0.156336	0.0625547	0.247329	0.340809	0.186089	0.254765	0.210282	0.434966	0.174764	0.151365	0.213413	0.318715	0.361991	0.233204	0.163601	0.268078	0.252022	0.171898	0.184029	0.114709	0.121149
AC239798.2	0	0	0	0.099212	0.0538441	0.121716	0.0845854	0.0874334	0	0.146148	0.0947576	0	0.0558893	0.0826448	0.136733	0	0	0.0570073	0.0849028	0.0703533	0	0.117308	0.0991511	0.0333572	0.0721797	0.164238	0.0824789	0.0658188	0.095252	0.0502553	0.052302	0	0.0669142	0.0996802	0	0.119758	0.0621069	0	0	0.0544015	0	0.0886302	0.049917	0	0.117308	0.0337191	0	0	0.244208
AC245595.1	1.02274	3.58608	0.893261	1.44373	0.666758	2.30414	0.970361	1.77192	0.83093	1.96466	1.36242	0.17368	0.947964	1.62732	1.64512	0.98244	1.02274	1.10712	1.90716	0.242136	1.62732	1.18286	1.36242	1.21082	1.18037	1.45992	1.42419	1.77192	1.51268	1.15237	1.24706	2.65363	0.874687	0.494781	0.751344	0.60694	1.01907	1.74412	0.604777	1.00128	1.82991	0.984265	1.919	1.29744	1.48416	1.40891	1.93061	0.890368	1.47033
AC246785.3	0	0	0.62124	0	0	0	1.01907	0	0	0	0.331093	0	0.240208	0	0	0	0	0.652502	0.617191	0	0.765113	0	0	0.226969	0	0.488533	0.884523	0.627902	0.409572	0	0	0	0.589654	0.723248	0	0	0.638824	0.438092	0.310471	0	0.473073	0.648297	0	0.218975	0	0	0.292575	0	0
LINC01632	0	0	0	0	0	0	0	0.156336	0	0	0	0	0	0	0	0	0	0	0	0	0	0	0	0	0	0	0	0	0	0	0	0	0	0	0	0	0	0	0	0	0	0	0	0	0	0	0	0	0
FP700111.1	0	0	0	0	0.0538441	0	0	0	0	0	0	0	0	0	0	0	0	0	0	0	0	0	0	0	0	0	0	0	0	0	0	0	0	0	0	0	0	0	0	0	0	0	0.0409732	0	0	0	0	0	0
AC245014.3	0.525428	0.253687	0	0.65587	0	0.614125	0.338172	0.273354	0.231982	0	0	0	0.203494	0.19477	0.441409	0	0.462889	0.533679	0	0	0	1.76251	0.449813	0.357678	0.536664	1.28956	0	0	0	0.978991	0	0	0.960524	0.231676	0	0.506061	0.514588	0.374976	0.25397	0	0.695536	1.00815	0.291584	0.346259	0	0.558097	1.38694	0.803534	0.534811
AC245014.1	0	0	0	0	0	0	0	0	0	0	0	0	0	0.408389	0	0	0	0	0	0	0	0	0	0	0	0	0	0	0	0	0	0	0	0	0.182921	0	0	0	0	0	0	0.233204	0.462372	0	0	0	0	0	0
LINC01719	0.301421	0.381041	0.260446	0.584295	0.381474	0.787916	0.432977	0.454111	0.119629	0.5876	0.570994	0.192026	0.193256	0.356398	0.383635	0.256083	0.295672	0.588984	0.164842	0.0976288	0.274375	0.386174	0.198802	0.515641	0.0841812	0.274116	0.228841	0.779643	0.117784	0.435917	0.273605	0.520021	0.30865	0.302008	0.353331	0.35503	0.357678	0.167156	0.419196	0.280533	0.220691	0.78211	0.30865	0.327033	0.607818	0.328341	0.250763	0.170445	0.276182
AC244394.2	0	0	0.0643588	0.328991	0	0	0.126915	0	0	0	0.137099	0	0	0	0	0	0	0	0	0	0	0.711273	0	0	0	0	0	0	0	0	0	0	0	0	0	0	0.0916209	0	0	0	0	0	0.0944701	0.0504427	0	0	0	0	0
AC241644.1	0	0	0	0	0	0	0	0	0	0	0	0	0	0	0	0	0	0	0	0	0	0	0	0	0	0	0	0	0	0	0.136637	0	0	0	0	0	0	0	0	0	0	0	0	0.115371	0	0	0	0	0
AC241644.2	0	0	0	0	0	0	0	0	0	0	0	0	0	0	0	0	0	0	0	0	0	0	0	0	0	0	0	0	0	0	0	0	0	0	0	0	0	0	0	0	0	0	0	0	0	0	0	0	0
AC239803.2	0.209373	0.451024	0.267194	0	0	0.614125	0	0.767191	0.465841	0.514117	0.472661	0.654258	0.394318	0.215268	0	0.397565	0.635336	0.340356	0	0	0.827192	0.591134	0.416547	0	0.325289	0.518755	0.648297	0	0.130757	0.893261	0.330421	0	0.354184	0.833803	0.243559	0.796144	0.915586	0	0.555986	0	0.378776	0	0.397986	0	0.741681	0.494781	0.237516	0	0
AC239803.3	0.301421	0.245663	0.392465	0.812003	0	0.59773	0	0.332029	0.331393	0	0.695536	0.618843	0.31835	0.408389	0	0.468049	0.143923	0.360406	0.419196	0.207007	0.60694	0.458035	0.482224	0.237516	0.351901	0.415627	0.33538	0.187894	0.170241	0.744918	0	0.606176	0.293349	0.522946	0.394804	0.696544	0.706461	0	0.326487	0.142766	0.847201	0.527747	0.495852	0.346259	0.681271	0.1433	0.348365	0	0.441409
AC239809.3	0.121548	0.629741	0.0996123	1.22634	0.555986	1.11768	0.528473	1.2368	0.949522	0.3164	0.919957	1.06274	1.13491	0.142766	0.874687	0.971885	0.857585	1.1156	2.05644	1.00128	0.274375	1.03965	0.800055	0.813211	1.14124	0.930389	0.629741	1.5408	0.913907	1.04342	0.482224	0.952659	1.22391	0.645668	1.04153	2.0084	0.563193	0.779643	0.470284	1.18947	1.21874	1.55997	0.947964	1.31958	0.552354	1.11126	0.623634	0.592736	0.595611
AC239803.1	0	0	0	0	0	0	0	0	0	0	0	0	0	0.178919	0	0	0	0	0	0.0976288	0	0	0	0	0	0	0.181119	0.113642	0	0	0	0	0	0	0	0	0.102299	0	0.116386	0	0.115602	0	0	0	0	0.171898	0.0824789	0	0
AC245100.6	0	0	0	0	0	0.0678785	0	0	0.0465857	0	0	0	0	0.0258953	0	0	0	0.0570073	0	0.0703533	0	0	0	0	0	0	0	0.0504427	0	0	0.0328534	0	0	0	0	0	0	0	0	0	0	0	0	0	0	0	0	0.0695902	0.0570073
AC245100.1	0	0	0	0	0.137099	0	0	0.0874334	0	0	0	0	0	0.0258953	0	0	0	0	0	0	0	0	0	0	0	0	0	0.0658188	0	0	0.0612724	0	0	0	0	0	0	0	0	0.0451138	0	0	0	0.0308068	0	0.052235	0	0.0816648	0
AC245100.7	0	1.18496	0.387001	0.252688	0	0.228138	0	0.186089	0.159497	0	0	0	0.25397	0.115138	0	0.190196	0	0.204551	0.414705	0.207007	0.146946	0	0.531704	0.12744	0	0	0.193661	0.187894	0	0.327374	0.364275	0.243376	0	0	0	0.335028	0.174764	0.242826	0.17368	0	0.245165	0.145484	0.19307	0.115371	0	0.171898	0.151652	0.186895	0.201814
AC239804.1	0.225009	0.749235	0.815635	0.918509	0.506705	0	0.528473	0.665101	0.729296	1.1156	0.595611	0.137522	0.563193	0.247329	0	0.290646	1.1156	1.18037	0.602581	0.808206	0.468649	0.984265	0.832366	0.991272	0.924334	0.207659	0.809501	0.536664	0.514588	0.536036	0.501819	0.503179	0.331093	0.532361	0.551606	0.752414	0.579348	0.19968	0.470284	0.728273	0.473073	0.246214	0.883043	0.894699	0.890368	0.581424	0.910826	0.532361	0.62124
AC245297.2	1.03767	1.12848	1.42745	0.824472	1.29211	1.4629	1.85574	1.1156	1.49813	1.15928	1.25501	1.5448	1.82991	1.50191	1.3087	1.1684	0.794989	1.94224	1.15237	1.17789	0.78211	2.3217	1.24968	1.5448	1.27826	1.1262	2.24685	1.34184	1.36846	2.07627	1.94813	1.15018	1.72563	1.78099	0.819153	1.45693	1.67019	1.33083	0.975341	1.33907	1.20625	1.5057	1.5057	1.84024	1.79572	1.6983	1.37439	1.34748	0.954231
FALEC	0	0	0	0.180173	0.137099	0.152547	0	0.137369	0	0.201363	0	0	0	0	0	0.127008	0.118352	0	0	0.152547	0	0	0	0.0860821	0	0	0	0	0	0	0.175923	0.164238	0.233656	0	0.0986464	0	0	0	0	0	0.296696	0.360777	0	0.158984	0.219716	0.113856	0.111051	0	0
AL589765.6	0.448507	0.451024	0.387001	0.328991	0.343247	0.170696	0.285853	0.137369	0.638824	0	0.213199	0.17368	0.193256	0.464806	0	0.127008	0.734412	0.269069	0.0735347	0.152547	0.34213	0	0.232873	0.257865	0.141664	0	0.33538	0.244208	0	0	0.254979	0.175756	0	0.302008	0.362725	0	0.232194	0	0.229016	0.268886	0	0.296696	0.444505	0.170445	0	0	0.111051	0.344721	0.139955
AL589986.2	0.756933	0	0.144781	0.299172	0.584295	0	0	0.214589	0	0	0	0	0.169573	0	0	0	0	0	0.174368	0	0	0.301715	0	0	0	0.164238	0	0	0	0	0	0	0	0	0	0	0.219951	0	0	0.167397	0.296696	0	0	0.140733	0	0.214781	0	0	0
AL161636.1	0	0	0	0	0	0	0	0	0	0	0	0	0	0.0227751	0	0	0	0	0	0	0	0	0	0	0	0	0	0	0	0	0	0	0	0	0.0353593	0	0	0	0	0	0	0	0	0	0	0	0	0	0
AL358472.2	0.579348	0.629741	0.909423	0.390182	1.15692	0.366012	0.625413	0.482224	0.682343	0.628822	0.570994	0.714133	0.50368	0.635336	0.807006	0.798692	0.944732	0.734412	0.703383	0.499979	0.643943	0.552354	0.378048	0.791551	0.48928	0.3894	0.703383	0.687938	0.734412	0.649158	0.717008	0.679444	0.743689	0.78911	0.627902	0.434966	0.402586	0.275689	0.326487	0.582081	0.706461	0.95109	0.733323	0.82587	0.35101	0.849766	0.736509	0.613204	0.672301
AL451085.1	0.275348	0.145904	0.160052	0	0.0996802	0.228138	0	0.257865	0.0899951	0.388633	0	0.137522	0	0.0508555	0.169573	0	0.244208	0	0.180173	0.113929	0.146946	0	0.175566	0	0.096952	0	0.0934571	0.0971508	0.352313	0.102015	0	0	0.186089	0.231676	0.210282	0	0.161473	0.495852	0.17368	0.0763144	0	0.0763144	0.0944701	0.0605955	0	0.0844284	0.0824789	0	0
AL139130.1	0	0	0	0	0	0	0	0	0	0	0	0	0	0	0	0	0	0	0	0	0	0	0	0	0	0	0	0	0	0	0	0	0	0	0	0	0	0	0	0	0	0	0.0409732	0	0	0	0	0	0
AL139412.1	0	0	0	0.196086	0	0	0	0	0	0	0	0	0	0	0	0	0	0	0	0	0.115815	0	0	0	0.141664	0	0.133364	0	0.208851	0	0	0	0	0	0.115181	0	0.174764	0	0	0.0763144	0.134888	0.116056	0	0.0958273	0	0	0	0	0.289323
AL365181.1	0	0	0	0	0	0	0	0	0	0	0	0	0	0	0	0	0	0	0	0	0	0	0	0	0	0	0	0	0	0	0	0	0	0	0	0	0	0	0	0	0	0	0	0	0	0	0	0	0
AL365181.4	0	0	0	0	0	0.170696	0.163449	0	0.119629	0	0.122224	0	0.26533	0	0	0	0	0	0.275007	0	0	0	0	0	0.141664	0	0	0	0	0.130446	0.100939	0	0.142431	0	0	0	0	0	0	0.103693	0	0	0	0	0	0.129128	0.111051	0	0
AL590666.3	0	0.0395809	0	0	0	0	0	0	0.0388806	0	0	0	0	0	0	0	0	0	0	0	0	0	0	0	0	0	0	0	0	0	0	0	0	0	0	0	0	0	0	0	0	0	0	0	0	0	0	0	0
AL138900.1	0	0	0	0	0	0	0	0	0	0	0	0	0	0	0	0	0	0	0	0	0	0	0	0	0	0	0	0	0	0	0	0	0	0	0	0	0	0	0	0	0	0	0	0	0	0	0	0	0
LINC01704	0.0921472	0.0907908	0.125699	0.280006	0	0	0.117503	0.286559	0	0	0.0947576	0	0	0	0	0.0799794	0	0.159604	0.280006	0	0.0844284	0.1433	0	0	0.108513	0.112899	0.10493	0.105298	0.208851	0	0.0790515	0.142101	0.199298	0.167542	0.0617796	0	0	0.121937	0.132626	0.0763144	0	0	0	0.0605955	0	0.0738419	0	0.114709	0
AL138899.1	0	0	0	0	0	0	0	0	0	0	0	0	0	0.0258953	0	0.0528177	0	0	0.0415507	0	0.038132	0	0	0	0	0	0	0.0743268	0	0	0	0.0675734	0	0	0	0	0	0.087163	0	0	0	0	0	0	0	0	0	0	0
AL663023.1	0.0921472	0	0	0	0	0	0	0	0	0	0	0	0	0	0	0	0	0	0	0	0	0	0	0	0	0	0	0	0	0	0	0	0	0	0	0	0	0	0	0	0	0	0	0	0	0	0	0	0
SNHG28	0.525428	0.57515	0.880084	0.744918	0.490544	0.650019	0.495317	0.286559	0.465841	0.805807	0.623634	0.50418	0.698474	0.588984	0.624466	0.749235	0.282152	0.891823	0.946407	0.342451	0.364275	0.671408	0.416547	0.678689	0.526528	0.477213	0.316762	0.753593	0.528473	0.744918	0.580789	0.361654	1.66612	0.598522	0.717008	0.910826	0.563193	0.568656	0.897857	0.526036	0.642346	0.708282	0.682343	0.680199	1.19683	0.596339	0.984265	0.186895	1.07471
LINC01133	0.162355	1.36242	0.432482	0.156897	0.156224	0.08151	0.184789	0.0737704	0.331393	0.190196	0.0711879	0.137522	0.227163	0.209771	0.125818	0.285304	0.282152	0.204551	0.133048	0.130873	0.241292	0.0946503	0	0.266534	0.312462	0.112899	0.148781	0.283117	0.208851	0.188388	0.263065	0.133048	0.172496	0.356398	0.303184	0.280533	0.252474	0.19968	0.148561	0.23674	0.52702	0.184631	0.104088	0.0605955	0.129713	0.214781	0.304254	0.0816648	0.069478
AL354714.3	0	0	0	0	0	0	0	0	0	0	0	0.154765	0	0	0	0	0	0	0	0	0	0	0	0	0	0	0	0	0	0	0	0	0	0	0	0	0	0	0	0	0	0	0	0	0	0	0	0	0
AL356441.1	0	0	0	0	0	0	0	0.156336	0.129639	0	0	0	0	0	0	0	0	0	0	0	0.115815	0	0	0.108409	0	0	0	0	0	0	0	0	0	0	0	0	0	0	0	0	0	0	0	0	0	0	0	0	0
AL390115.1	0	0	0	0	0	0	0	0	0	0	0	0	0	0.240385	0	0	0	0	0	0.207007	0	0	0	0	0	0	0	0	0	0	0	0	0	0	0	0	0	0	0	0	0	0	0	0	0	0	0	0	0
AL583804.1	0	0	0	0	0	0	0	0	0	0	0	0	0	0	0	0	0	0	0	0	0	0	0	0	0	0	0	0	0	0	0	0	0	0	0	0	0	0	0	0	0	0	0	0	0	0	0	0	0
LINC01675	0	0	0	0	0	0	0	0	0	0	0	0	0	0	0	0	0	0	0	0	0	0	0	0	0	0	0	0	0	0	0	0	0	0	0	0	0	0	0	0	0	0	0	0	0	0	0	0	0
AL451050.2	0.198802	0.275007	0.902277	0.36687	0.26839	0.228138	0.808206	0.186089	0.551606	0.279512	0	0.581424	0.0699922	0.171139	0.169573	0.190196	0.168686	0.349747	0.590325	0.207007	0.617191	0.271455	0.302863	0.403525	0.096952	0.140425	0.193661	0.26567	0.423399	0.548797	0.372331	0.229831	0.107684	0.231676	0.279244	0.19968	0.611655	0.331093	0.326487	0.142766	0.328341	0.160747	0.319454	0.191846	0.17057	0.365575	0.292575	0.750273	0.201814
AL023755.1	0	0	0	0	0	0	0	0	0	0	0.0502059	0	0	0.0258953	0	0	0	0	0	0.0703533	0	0	0	0	0	0	0	0	0	0	0	0.0789544	0	0	0	0	0	0	0	0.0451138	0	0	0	0	0	0	0	0	0
AL031275.1	0	0.315768	0	0	0	0	0	0	0	0	0	0	0	0	0	0.20321	0	0	0.331093	0	0	0.289011	0	0	0	0	0.203954	0	0	0.188388	0	0	0	0.167542	0	0	0	0	0	0	0	0.160747	0	0	0.320776	0.202175	0.170979	0	0
LINC00626	0	0	0	0	0	0	0	0	0	0	0	0	0	0	0	0	0	0	0	0	0	0	0	0	0	0	0	0	0	0	0	0	0	0	0	0	0	0	0	0	0	0.160747	0	0	0	0	0	0.125263	0
LINC00970	0.0735923	0	0	0	0.0699922	0	0	0	0	0	0	0	0	0	0	0.0699367	0	0.0756927	0	0	0	0	0	0	0	0	0	0	0	0	0	0	0	0	0	0	0.0621069	0	0	0.0544015	0	0	0	0	0	0	0.0521215	0	0
AL021940.1	0	0	0	0	0	0	0	0	0	0	0	0	0	0	0	0	0	0	0	0	0	0	0	0	0	0	0	0	0	0	0	0	0	0	0	0	0	0	0	0	0	0	0	0	0	0	0	0	0
LINC01681	0	0.0730557	0	0	0	0	0	0	0	0	0	0	0	0	0	0	0	0	0	0	0	0	0	0	0	0	0	0	0	0	0	0	0	0	0	0	0.0817826	0	0.0881516	0	0	0	0	0	0.153667	0	0	0	0
LINC01142	0	0.0489065	0.0486975	0	0	0	0	0	0	0	0	0.0794373	0	0	0	0	0.0508082	0	0	0	0	0	0	0	0	0.0386052	0	0	0	0	0	0	0	0	0	0	0	0	0.0541223	0	0	0	0	0.0308068	0	0	0	0	0
AL162399.1	0	0	0	0	0	0	0	0	0	0	0	0	0	0	0	0	0	0	0	0	0	0	0	0	0	0	0	0	0	0	0	0	0	0	0	0	0	0	0	0	0	0	0	0	0	0	0	0	0
AL023495.1	0	0	0	0	0	0	0	0	0	0	0	0	0	0	0	0.0528177	0	0	0	0	0	0	0	0.0333572	0	0	0	0	0	0	0	0	0.0565176	0	0	0	0	0	0	0	0	0	0	0	0	0	0	0	0
Z97200.1	0.0735923	0.119887	0.144781	0	0.190473	0.0678785	0.0922865	0	0	0	0.0391027	0	0.0558893	0	0.0985749	0	0.0925858	0	0	0	0.0990901	0	0	0.0333572	0	0.0566978	0.0496398	0.0504427	0	0.074768	0.0895155	0.0675734	0	0	0.0521681	0.119758	0	0.121937	0	0	0.0665708	0.035029	0.0675734	0	0.153667	0	0	0	0.069478
AL031599.1	0	0	0	0	0	0	0	0	0	0	0	0	0	0	0	0	0	0	0	0	0	0	0	0	0	0	0	0	0	0	0	0	0	0	0	0	0	0	0	0	0	0	0	0	0	0	0	0	0
Z97198.1	0	0	0	0	0	0	0	0	0	0	0	0	0	0	0	0	0	0	0	0	0	0	0	0	0	0	0	0	0	0	0	0	0	0	0	0	0	0	0	0	0	0	0	0	0	0	0	0	0
AL022310.1	0	0	0	0	0	0.121716	0	0	0.0899951	0	0	0	0	0	0	0	0	0	0	0	0.0721797	0	0	0	0	0	0	0	0	0	0	0	0	0	0	0	0	0	0	0.0763144	0	0	0	0	0	0	0	0	0.107398
AL121983.2	0	0.0825679	0	0	0	0	0	0.403056	0.269352	0	0.164238	0	0.193256	0	0	0	0	0.42715	0	0	0.241292	0	0	0	0.188935	0.0684425	0.181119	0	0	0	0	0	0	0	0.210282	0	0	0	0.229016	0.201814	0	0	0	0.182563	0	0	0	0	0
AL008626.1	0	0	0	0	0	0	0	0	0	0	0	0	0	0	0	0	0	0	0	0	0	0	0	0	0	0	0	0	0	0	0	0	0	0	0	0	0	0	0	0	0	0	0	0	0	0	0	0	0
AL513329.1	0	0.15674	0.307328	0.280006	0.26839	0.366012	0.329385	0.20092	0.297419	0.290394	0.304254	0.353712	0.145262	0.178919	0.169573	0.190196	0.0925858	0.204551	0.52414	0.310169	0.274375	0	0.315492	0.137099	0.108513	0.0684425	0.567303	0.363874	0.289011	0.115687	0.538104	0.243376	0.107684	0	0.161123	0.35503	0.174764	0.151365	0.338172	0.21128	0	0.307328	0.19307	0.201231	0	0.187343	0	0.506705	0
LINC01645	0	0.129238	0.25397	0.546044	0	0.188935	0	0	0.138539	0	0.137099	0	0	0	0	0.152772	0	0.169467	0.133048	0	0	0.216963	0	0.108409	0	0	0	0	0.316762	0	0	0	0.153295	0.127692	0.233039	0	0.149829	0.19968	0	0	0	0.451024	0	0.201231	0.252022	0.1433	0.250763	0	0
AL122019.1	0	0	0	0	0	0	0	0	0	0	0	0	0	0	0	0	0	0	0	0	0	0	0	0	0	0	0	0	0	0	0	0	0	0	0	0	0	0	0	0	0	0	0	0	0	0	0	0	0
LINC01741	0	0	0	0	0	0	0	0	0	0	0	0	0	0	0	0	0	0	0	0	0	0	0	0	0	0	0	0	0	0	0	0	0	0	0	0	0	0	0	0	0	0	0	0	0	0	0	0	0
RASAL2-AS1	0.374185	0.0996123	0.160052	0.196086	0.381474	0.170696	1.07869	0.347746	0.179964	0.26839	0.0947576	0.232406	0.479179	0.126691	0.125818	0.371223	0.0925858	0.147819	0.149278	0.342451	0.228665	0.216963	0.185529	0.438613	0.172296	0.258353	0.10493	0.155404	0.0771978	0.213785	0.273605	0.142101	0.301421	0.153295	0.290983	0	0.30107	0.121937	0.132626	0.103693	0.125699	0.307328	0.713166	0.191846	0.285304	0.348056	0.0824789	0.170445	0.289323
C1orf220	0.412528	0.300474	0.582737	0.311594	0.381474	0.384845	0.396087	0.347746	0.31441	0.25426	0.237061	0.252474	0.31835	0.43648	0.169573	0.290646	0.400725	0.407589	0.457529	0.259131	0.274375	0.249807	0.277891	0.357678	0.25426	0.232406	0.16439	0.584295	0.194214	0.188388	0.355404	0.407238	0.233656	0.195362	0.417036	0.248543	0.283386	0.259131	0.266011	0.167397	0.3096	0.495852	0.506705	0.286084	0.285304	0.202175	0.281123	0.114709	0.350042
AL137796.1	0	0	0	0	0	0	0	0.137369	0.109161	0	0	0	0	0	0	0	0	0	0	0	0	0	0	0.0860821	0	0.174187	0.118201	0	0	0.130446	0	0	0.128965	0	0	0	0	0	0	0	0	0	0	0	0.201975	0	0	0	0
AL359853.3	0	0	0	0	0	0	0	0	0	0	0	0	0	0	0	0	0	0	0	0	0	0	0	0	0	0	0	0	0	0	0	0	0	0	0	0	0	0	0	0	0	0	0	0	0	0.187343	0	0	0
AL359853.2	0	0	0	0	0	0	0	0	0	0	0	0	0	0	0	0	0	0	0	0	0	0	0.43958	0	0	0	0	0	0	0	0	0	0	0	0	0	0	0	0	0.21128	0	0	0	0	0	0	0	0	0
AL353708.3	0.555404	0.491626	0.653543	0.520622	0.607818	0.248333	1.0969	0.332029	0.958887	0.157055	0.316084	0.50418	0.435441	0.695536	0.353712	0.305903	0.62636	0.598522	0.732323	0.724226	0.458598	0	0.264915	0.290646	0.224402	0.707402	0.567303	0.661331	0.528473	0.599313	0.717008	0.205824	0.26839	0.302008	0.362725	0.280533	0.197072	0.275689	0.729296	0.377232	0.339926	0.674915	0.627131	0.31908	0.201975	0.457529	0.380608	0.31745	0.429875
AL353708.2	0	0	0	0	0	0	0	0	0	0	0	0	0	0	0	0	0	0	0	0	0	0	0	0	0	0	0	0	0	0	0	0	0	0	0	0	0	0	0	0	0	0	0	0	0	0	0	0	0
AL353708.1	0.0735923	0.21739	0.072017	0.108305	0.0996802	0	0	0.137369	0.056587	0.11133	0.0831862	0.0929584	0	0.0707	0.157055	0	0.218662	0.181273	0	0	0.131225	0.301715	0	0.0401039	0	0	0.0607777	0.0971508	0.221527	0.130446	0.126915	0.123774	0.21113	0.153295	0.0723851	0	0.113783	0	0	0.0451138	0.125699	0.184631	0	0	0.117308	0.0844284	0.0521215	0	0
AL390718.1	0	0	0	0	0	0	0	0	0	0	0	0	0	0	0	0	0	0	0	0	0	0	0	0	0	0	0	0	0	0	0	0	0	0	0	0	0	0	0	0	0	0	0	0	0.238171	0	0	0	0
OVAAL	0	0	0	0	0	0	0	0	0	0	0	0	0	0	0	0	0	0	0	0	0	0	0	0	0	0	0	0	0	0	0	0	0	0	0	0	0	0	0	0	0	0	0	0	0	0	0	0	0
AL162431.1	0.40122	0	0.153165	0	0	0	0	0.137369	0	0	0	0	0	0.16296	0	0	0	0	0.119087	0	0	0	0	0.12744	0	0	0	0	0	0	0.136637	0.175756	0	0	0	0	0.232194	0	0	0	0	0.145484	0	0	0	0	0	0	0
LINC01732	0.151365	0	0	0	0	0	0.163449	0.241908	0.119629	0	0	0	0	0.0826448	0	0	0	0.147819	0	0.152547	0	0.178386	0	0	0.141664	0	0	0	0	0	0	0.175756	0	0	0	0	0	0	0.132626	0	0	0	0	0	0	0	0	0	0
AL358393.1	0	0	0	0	0	0	0	0	0	0	0	0	0	0	0	0	0	0	0	0	0	0	0	0	0	0	0	0	0	0	0	0	0	0	0	0	0	0	0	0	0	0	0	0	0	0	0	0	0
LINC01699	0	0	0	0	0	0	0	0	0	0	0	0	0	0	0	0	0	0	0	0	0	0	0	0	0	0	0	0	0	0	0	0	0	0	0	0	0	0	0	0	0	0	0	0	0	0	0	0	0
AL161734.1	0	0	0	0	0	0	0	0	0	0	0	0	0	0	0	0	0	0	0	0	0	0	0	0	0	0	0	0	0	0	0	0	0	0	0	0	0	0	0	0	0	0	0	0	0	0	0	0	0
AL355482.2	0	0.0565523	0.0353593	0	0	0	0.0922865	0	0	0	0	0	0	0	0	0	0	0	0	0	0	0	0	0	0	0	0	0	0	0.074768	0	0	0	0.0515669	0	0	0	0	0	0	0.0869166	0	0	0	0	0	0	0	0
AL390856.1	0	0	0	0	0	0	0	0	0	0	0	0	0	0	0	0	0	0	0	0	0	0	0	0	0	0	0	0	0	0	0	0	0	0	0	0	0	0	0	0	0	0	0	0	0	0	0	0	0
LINC01344	0.0664163	0.109872	0	0	0	0.0563907	0	0	0	0	0	0	0	0	0	0	0	0	0	0	0	0	0	0	0	0	0	0	0	0	0	0	0	0	0.182921	0	0	0	0	0.0544015	0	0	0	0	0	0	0	0.0584458	0.0461531
LINC00272	0	0	0.0561975	0	0	0	0.231982	0	0	0	0	0	0	0.0420811	0	0	0	0	0	0	0	0	0	0	0	0	0	0	0	0	0	0	0	0	0.150114	0	0	0	0	0	0	0	0	0	0	0	0.210282	0	0
LINC01686	0.102862	0.175923	0.132244	0.108305	0	0	0	0	0.056587	0.179222	0.0502059	0	0.0368208	0.0938491	0.116056	0.152772	0.0508082	0.0667603	0.137522	0.152547	0.0721797	0.216963	0.122371	0.108409	0.0601399	0.0566978	0	0	0.095252	0	0.0612724	0.114581	0.0669142	0	0	0.185946	0.113783	0.0996123	0.0881516	0.0889081	0.115602	0.101474	0.0595464	0.0504427	0	0.0738419	0.0953538	0.104843	0.121149
LINC01688	0	0	0	0	0	0	0	0	0	0	0	0	0	0	0	0	0	0	0	0	0	0	0	0	0	0	0	0	0	0	0	0	0	0	0	0	0	0	0	0	0	0	0	0	0	0	0	0	0
AL445228.1	0	0	0	0	0	0	0	0	0	0	0	0	0	0	0	0	0	0	0	0	0	0	0	0	0	0	0	0	0	0	0	0	0	0	0	0	0	0	0	0	0	0	0	0	0	0	0	0	0
AL445228.2	0.235312	0.4055	0.750273	0.520622	0.3581	0.152547	0.471705	0.286559	0.269352	0.26839	0.444027	0.402151	0.182234	0.450418	0.285621	0.592736	0.491626	0.292836	0.46745	0.276886	0.320776	0.396802	0.354184	0.373191	0.289635	0.415627	0.581424	0.338794	0.339495	0.312462	0.20681	0.380608	0.280533	0.611655	0.233039	1.0646	0.679444	0.292212	0.419196	0.280533	0.35149	0.19989	0.444505	0.125109	1.02446	0.348056	0.151652	0.331694	0.552898
LINC01633	0	0	0	0	0	0	0	0	0.0994543	0	0	0	0	0	0	0	0	0	0	0	0	0	0	0	0	0	0	0	0	0	0	0	0	0	0	0	0	0.19968	0	0	0	0	0	0	0	0	0	0	0
LINC01350	0	0	0	0	0	0	0	0	0	0	0	0	0	0	0	0	0	0.169467	0	0	0	0	0	0	0	0	0	0	0	0	0	0	0	0	0.0986464	0.229304	0	0	0	0	0	0	0	0	0	0.0976288	0	0	0
AL133383.1	0	0.109872	0	0.196086	0	0	0	0.0874334	0	0.127555	0	0.10704	0	0	0	0.190196	0	0.261164	0	0.152547	0.0610902	0	0	0	0	0	0	0	0	0	0.100939	0	0.0876759	0.0615802	0	0	0	0	0	0	0.105362	0	0	0	0	0.0632845	0.0607777	0.0932692	0
AL096803.3	0.151365	0	0.0907908	0	0	0.170696	0	0.137369	0	0.214781	0.122224	0.17368	0	0.171139	0	0.13929	0	0	0	0.293349	0.198288	0.198081	0.232873	0.266534	0	0.0973112	0	0.135283	0.277605	0	0.192639	0	0	0	0.115181	0	0	0.184948	0.350529	0.103693	0	0	0	0.182563	0	0.129128	0	0.139558	0
ERVMER61-1	0	0	0	0	0	0	0	0	0	0	0	0	0	0	0	0	0	0	0	0	0	0	0	0	0	0	0	0	0	0	0	0	0	0	0	0	0	0	0	0	0	0	0	0	0	0	0	0	0
AL596211.1	0	0	0	0	0	0	0	0	0	0	0	0	0	0	0	0	0	0	0	0	0	0	0	0	0	0	0	0	0	0	0	0	0	0	0	0	0	0	0	0	0	0	0	0	0	0	0	0	0
AL929288.1	0	0	0	0	0	0	0	0	0	0	0	0	0	0	0	0	0	0	0	0	0	0	0	0	0	0	0	0	0	0	0	0	0	0	0	0	0	0	0	0	0	0	0	0	0	0	0	0	0
AL691515.1	0	0	0	0	0	0	0	0	0	0	0	0	0	0	0	0	0	0	0	0	0	0	0	0	0	0	0	0	0	0	0	0	0	0	0	0	0	0	0	0	0	0	0	0	0	0	0	0	0
AL691515.2	0	0	0	0	0	0	0	0	0	0	0	0	0	0	0	0	0	0	0	0	0	0	0	0	0	0	0	0	0	0	0	0	0	0	0	0	0	0	0	0	0	0	0	0	0	0.312666	0	0	0
LINC01035	0	0	0	0	0	0	0	0	0	0	0.0711879	0	0	0	0	0.0903218	0	0	0	0	0	0	0	0	0	0.0566978	0	0	0	0	0	0	0.0987503	0	0	0	0	0	0	0	0	0	0	0	0	0	0	0	0
LINC01701	0	0	0	0	0.325559	0	0	0	0.269352	0	0	0	0	0	0	0	0	0	0	0	0	0	0	0	0.188935	0.140425	0	0	0	0	0.136637	0	0	0	0	0.335028	0	0	0	0	0	0	0.183474	0	0	0	0.151652	0	0.185432
AL591504.1	0	0	0	0	0	0	0	0	0	0	0	0	0	0	0	0	0	0	0	0	0	0	0	0	0	0	0	0	0	0	0	0	0	0	0	0	0	0	0	0	0	0	0	0	0	0	0	0	0
LINC01351	0	0	0	0	0	0	0	0	0	0	0	0	0	0	0	0	0	0	0	0	0	0	0	0	0	0	0	0	0	0	0	0	0	0	0	0	0.283386	0	0	0	0	0	0	0	0.238171	0	0	0	0
AL391645.1	0	0	0	0	0	0	0	0	0	0	0	0	0	0	0	0	0	0	0	0	0	0	0	0	0	0	0	0	0	0	0	0	0	0	0	0	0	0	0	0	0	0	0	0	0	0	0	0	0
LINC01720	0	0	0	0	0	0	0	0	0	0	0	0	0	0	0	0	0	0	0	0	0	0	0	0	0	0	0	0	0	0	0.0328534	0	0	0	0	0	0	0	0	0	0	0	0	0	0	0	0	0	0
AL713866.1	0	0	0	0	0	0	0	0	0	0	0	0	0	0	0	0	0	0	0	0	0.038132	0	0	0	0	0	0	0	0	0	0	0	0	0	0	0	0	0	0	0	0	0	0	0	0	0	0	0	0
LINC01680	0	0	0	0	0	0	0	0	0	0	0	0	0	0	0	0	0	0	0	0	0	0	0	0	0	0	0	0	0	0	0	0	0	0	0	0	0	0	0	0	0	0	0	0	0	0	0	0	0
AL359081.1	0	0	0	0	0	0	0	0	0	0	0	0	0	0	0	0	0	0	0	0	0	0	0	0	0	0	0	0	0	0	0	0	0	0	0	0	0	0	0	0	0	0	0	0	0	0	0	0	0
AL954650.1	0	0	0.0561975	0	0.0699922	0	0	0	0	0	0	0	0	0	0	0.0528177	0	0	0	0.0557975	0	0	0	0.0401039	0	0	0.0607777	0	0	0	0	0.0675734	0	0.0860821	0	0	0.0817826	0	0	0	0.0665708	0	0	0	0	0	0	0	0.0570073
AL136987.1	0	0	0	0	0	0	0	0	0	0	0	0	0	0	0	0	0	0	0	0	0	0	0	0	0	0	0	0	0	0	0	0	0	0	0	0	0	0	0	0	0	0	0	0	0	0	0	0	0
LINC01031	0	0	0	0	0	0	0	0	0	0	0.0711879	0	0	0	0	0	0	0	0	0	0	0	0	0	0	0	0	0	0	0	0	0.114581	0	0	0	0	0	0	0	0	0	0	0	0	0	0.0738419	0	0	0
AL357793.1	0	0	0	0	0	0	0	0	0	0	0	0	0	0	0	0	0	0	0	0	0	0	0	0	0	0	0	0	0	0	0	0	0	0	0	0	0	0	0	0	0	0	0	0	0	0	0	0	0
AL357793.2	0	0	0	0	0	0	0	0	0	0	0	0	0	0	0	0	0	0	0	0	0	0	0	0	0	0	0	0	0	0	0	0	0	0	0	0	0	0	0	0	0	0	0	0	0	0	0	0	0
AL356272.1	0	0	0	0	0	0	0	0	0	0	0	0	0.0558893	0	0	0	0	0	0	0	0	0	0	0	0	0	0	0	0	0	0	0	0	0	0	0	0	0	0	0	0	0	0	0	0	0	0	0	0
LINC01724	0	0	0	0	0	0	0	0	0	0	0	0	0	0	0	0	0	0	0	0	0	0	0	0	0	0	0	0	0	0	0	0	0	0	0	0	0	0	0	0	0	0	0.114581	0	0	0	0	0	0
AL157402.1	0	0	0	0	0	0	0	0	0	0	0	0	0	0	0	0	0	0	0	0	0	0	0	0	0	0	0	0	0	0	0	0	0	0	0	0	0	0	0	0	0	0	0	0	0	0	0	0	0
MIR181A1HG	0	0	0	0	0	0	0.108051	0	0	0	0	0	0.0299527	0.0601399	0	0.0528177	0	0	0	0	0	0.0731268	0	0	0.0841812	0.0973112	0.0607777	0.0504427	0	0	0	0	0	0.0515669	0	0	0	0	0.0881516	0	0.0665708	0	0.0754249	0	0	0	0.0362386	0	0.0461531
AC096631.1	0	0	0	0	0	0	0	0	0	0	0	0	0	0	0	0	0	0	0	0	0	0	0	0	0	0	0	0	0	0	0	0	0	0	0	0	0	0	0	0	0	0	0	0	0	0	0	0	0
LINC01222	0	0	0	0	0	0	0	0	0	0	0	0	0	0	0	0	0	0	0	0	0	0	0	0	0	0	0	0	0	0	0	0	0	0	0	0	0	0	0	0	0	0	0	0	0	0	0	0	0
LINC01221	0	0	0	0	0	0	0	0	0	0	0	0	0	0	0	0	0	0	0	0	0	0	0	0	0	0	0	0	0	0	0	0	0	0	0	0	0	0	0	0	0	0	0	0	0	0	0	0	0
LINC00862	0.225009	0.0996123	0.0303587	0	0	0	0.184789	0.117308	0	0	0.0502059	0.154765	0.0368208	0.0258953	0	0.114224	0.0810574	0.0667603	0.268078	0.0703533	0.146946	0.159604	0.277891	0.0552087	0	0	0.10493	0.0585187	0.0771978	0.0625547	0.0612724	0	0	0.0734772	0	0	0.0508555	0.331093	0.0541223	0.0653709	0	0.130815	0.104088	0	0.153667	0.187343	0.0437526	0.201099	0
AC097065.2	0	0	0	0	0	0	0.17487	0	0	0	0	0	0	0	0	0	0	0	0	0	0	0	0	0	0	0	0	0	0	0	0	0	0	0	0	0	0	0	0	0.103693	0	0	0	0	0	0	0	0	0
AL445483.1	0	0.138051	0	0	0	0.121716	0	0.101316	0	0	0.0831862	0	0.130873	0.0420811	0	0	0.218662	0.463881	0	0	0.0721797	0	0	0	0.096952	0.355765	0.16439	0.244208	0	0	0.284987	0.452689	0	0.208386	0.0723851	0.185946	0	0.212558	0.161246	0	0.378776	0.145484	0.163601	0.228841	0.17057	0	0.484975	0.104843	0
AC104463.1	0	0	0	0	0	0	0	0	0	0	0	0	0	0	0	0	0	0	0	0	0	0	0	0	0.272207	0	0	0	0	0	0	0	0	0	0	0	0	0	0	0	0	0	0	0	0	0	0	0	0
LINC01353	0.102862	0.0730557	0.0486975	0	0	0	0	0.170837	0.197508	0.339145	0.634585	0.211772	0.35503	0	0.42848	0.23343	0.205824	0.250508	0.383635	0.187894	0.52913	0	0.856309	0.299933	0.514117	0.711273	0.273856	0.301421	0.316762	0.466937	0.538104	0.82587	0.0987503	0.219437	0.703383	0	0.208618	1.24968	0.229016	0	0.319829	0.130815	0.15303	0.420078	0	0.278482	0.336657	2.81909	0.908028
LINC01136	0	0.341102	0.397986	0.108305	0.713166	0.207007	0.352631	0.377232	1.45356	0.563902	0.150203	0.449354	0.490544	0.115138	0.56662	0.13929	0.835098	1.45992	0.268078	0.629741	0.891823	0.601646	1.20172	2.09589	0.141664	0.652502	0.480383	0.498243	0.241908	0.299172	0.153546	1.01173	0.690903	0.433497	0.935147	0.298224	0.647428	3.46468	0.812003	0.23674	0.220691	0.160747	0.518051	0.0230708	0.153667	0.743689	1.14577	6.71068	0.908028
LINC00303	0.0735923	0	0	0	0	0	0	0	0	0	0	0	0	0	0	0	0	0	0	0	0	0	0	0	0	0	0	0	0	0	0.0455534	0	0	0	0.0521681	0	0	0	0	0	0	0	0	0	0	0	0	0	0
LINC00628	0	0	0.0486975	0	0	0	0	0	0	0	0	0	0	0	0	0	0	0.0667603	0.133048	0	0	0	0	0.117879	0	0	0	0	0.0771978	0	0.0612724	0.123774	0.0669142	0	0.0428617	0	0.0621069	0	0	0	0	0	0	0	0	0.052235	0.0521215	0	0
AL161793.1	0	0	0	0	0	0	0	0	0	0	0	0	0	0	0	0	0	0	0	0	0	0	0	0	0	0	0	0	0	0	0	0	0	0	0	0	0	0	0	0	0	0	0	0	0	0	0	0	0
AC098936.1	0	0	0	0	0	0	0	0	0.0388806	0	0	0	0	0	0	0	0	0	0.0456669	0	0.038132	0	0	0	0	0	0	0	0	0	0	0	0	0	0	0	0	0	0	0	0	0	0	0	0	0	0	0	0
AC244035.2	0	0	0	0	0	0	0	0	0	0	0	0	0	0	0	0	0	0	0	0	0	0	0	0	0	0	0	0	0	0	0	0	0	0	0	0	0	0	0	0	0	0	0	0	0	0	0	0	0
AC244034.2	0.284526	0.129238	0	0.21113	0	0	0	0.156336	0	0	0.346259	0	0.203494	0.247329	0	0.152772	0.133206	0	0	0.543364	0.30107	0	0.250253	0	0.619757	0	0	0	0.170241	0	0.293096	0.195362	0	0.127692	0.12744	0	0	0	0.25397	0	0	0	0.15303	0.361216	0.238171	0	0.126244	0	0.289323
AL445493.2	0	0	0.0416362	0	0.0841812	0	0	0	0	0	0	0	0	0	0	0	0	0	0	0	0	0	0	0	0.238171	0.0464287	0	0	0	0	0.136637	0	0	0	0	0	0	0.110616	0.0752674	0	0	0	0.114581	0	0	0.113856	0	0	0
AL596218.1	0	0	0	0	0	0	0	0	0	0	0	0.10704	0	0	0	0	0	0	0	0	0	0	0	0	0.0841812	0	0	0	0	0	0	0	0	0	0	0	0	0	0	0	0	0	0.0754249	0.0844284	0	0	0	0	0
MIR29B2CHG	0.970361	2.3388	0.532361	1.56793	0.607818	1.85085	1.03965	2.33025	0.98244	2.09589	1.42745	1.00293	4.20716	0.761679	1.84024	2.87438	1.35647	2.55811	1.04153	2.84667	4.03586	1.44696	3.35397	1.23138	3.2096	1.84024	1.97059	0.704451	2.03231	2.79329	1.33907	2.42791	2.08926	1.72563	2.50603	1.59545	3.58608	2.65363	0.740638	2.20034	1.90117	0.394804	1.95873	1.31958	0.890368	2.95467	3.63119	2.87438	0.632931
LINC01735	0	0	0	0	0	0	0	0	0	0	0	0	0	0	0	0	0	0	0	0	0	0	0	0	0	0	0	0	0	0	0	0	0	0	0	0	0	0	0	0	0	0	0	0	0	0	0	0	0
AC099793.1	0	0	0	0	0	0	0	0	0	0	0	0	0	0	0	0	0	0	0	0	0	0	0	0	0	0	0	0	0	0	0	0	0	0	0	0	0	0	0	0	0	0	0	0	0	0	0	0	0
LINC01717	0	0	0	0	0	0	0	0	0	0	0	0	0	0	0	0	0	0	0	0	0	0	0	0	0	0	0	0	0	0	0	0	0	0	0	0	0	0	0	0.103693	0	0	0	0	0	0	0.126244	0	0
LINC01774	0	0	0	0	0	0	0	0	0	0	0	0	0	0	0	0	0	0	0	0	0	0	0	0	0	0	0	0	0	0	0	0	0	0	0	0	0	0	0	0	0	0	0	0	0	0	0	0	0
AC092810.3	0	0	0	0	0	0	0	0	0	0	0	0	0	0	0	0	0	0	0	0	0	0	0	0	0	0	0	0	0	0	0	0	0	0	0	0	0	0	0	0	0	0	0	0	0	0.15674	0	0	0
LINC01696	0	0	0	0	0	0	0	0	0	0	0	0	0	0	0	0	0	0	0	0	0	0	0	0	0	0	0	0	0	0	0	0	0	0	0	0	0	0	0	0	0	0	0	0	0	0	0	0	0
LINC01698	0	0	0	0	0	0	0	0	0	0	0	0	0	0	0	0	0	0	0	0	0	0	0	0	0	0	0	0	0	0	0	0	0	0	0	0	0	0	0	0	0	0	0	0	0	0	0	0	0
AL023754.1	0	0	0	0	0	0	0	0	0	0	0	0	0	0	0	0	0.0698812	0	0	0	0	0	0	0	0	0	0	0	0	0	0	0	0	0	0	0	0	0	0	0	0	0	0	0	0	0	0	0	0
LINC00467	2.50603	1.59545	1.33907	2.42791	1.36242	2.0084	2.13523	2.7678	2.81909	1.81513	2.0699	1.74412	2.46642	1.70698	2.58798	3.22676	2.13523	2.65363	1.39246	1.72563	2.57806	1.78627	2.40914	1.62732	2.61062	1.81513	2.43752	2.0084	1.92485	3.31792	1.89052	2.87438	1.79989	2.64238	2.46642	1.70264	2.02013	2.44713	2.12151	2.79329	2.65363	2.5993	1.39564	1.86554	2.53681	1.86064	2.63113	1.76721	2.27929
AC105275.1	0	0	0	0	0	0	0	0	0	0	0	0	0	0	0	0	0	0	0	0	0	0	0	0	0	0	0	0	0	0	0	0	0	0	0	0	0	0	0	0	0	0	0	0	0	0	0	0	0
AL356310.1	0	0	0	0.180173	0	0	0	0	0	0	0	0	0	0	0	0	0	0.135025	0	0	0.0990901	0	0	0.0860821	0	0.0813551	0	0.123129	0	0.130446	0	0	0	0	0.0986464	0	0.113783	0	0.116386	0	0	0	0	0.072017	0	0	0	0	0.121149
LINC01693	0	0	0	0	0	0	0	0	0	0	0	0	0	0	0	0	0	0	0	0	0	0	0	0	0	0	0	0	0	0	0	0.0896522	0	0	0	0	0	0	0	0	0	0	0	0	0	0	0	0	0
AC096637.1	0	0	0	0	0	0	0	0	0	0	0	0	0	0	0	0	0	0	0	0	0	0	0	0	0	0	0	0	0	0	0	0	0	0	0	0	0	0	0	0	0	0	0	0	0	0	0	0	0
AC092803.1	0	0	0	0	0	0	0	0	0	0	0	0	0	0	0	0	0	0	0	0	0	0	0	0	0	0	0	0	0	0	0	0	0	0	0	0	0	0	0	0	0	0	0	0	0	0	0	0	0
LINC01740	0	0	0	0	0	0	0	0	0	0	0	0	0	0	0	0	0	0	0	0	0	0	0	0	0	0	0	0	0	0	0	0	0	0	0.243559	0.54403	0	0	0	0	0	0	0	0	0.454111	0	0	0	0
AC092803.2	0.824472	0.607818	0.632176	0.718049	0.555986	0.469764	0.548127	0.347746	0.36645	0.529786	0.595611	0.644778	0.381855	0.588984	0.624466	0.600012	0.512306	0.444983	0.713166	0.543364	0.857585	0.512945	0.498243	0.552898	0.619757	0.739595	0.480383	0.612429	0.479781	0.702405	0.372331	0.369156	0.21113	0.561072	0.474901	0.765113	0.479781	0.605412	0.429413	0.707402	0.787916	0.654258	0.713166	0.469207	0.304023	0.515058	0.359215	0.483778	0.244208
AL590648.3	0	0	0	0	0	0	0	0	0	0	0	0.211772	0	0	0	0.165961	0	0	0	0	0	0	0	0.117879	0	0	0	0	0	0	0	0	0	0.139698	0.138051	0	0	0	0	0	0	0	0	0	0	0	0	0	0
FLVCR1-DT	0.733323	0.224267	0.425956	0.665998	0.173082	0.207007	0.271674	0.894699	0.259418	0.727251	1.30317	0.714133	0.25397	0.310169	0.452112	1.12848	0.38741	0.538104	0.128965	0.792692	0.34213	0.899289	1.04342	1.1435	0.25426	1.16158	0.203954	0.386174	0.45916	0.913907	0.654258	0.152237	1.3837	0.243559	0.233039	0.955803	0.860899	0.121937	0.442982	0.630581	0.952659	1.30317	0.591134	1.05536	0.187894	0.685177	0.494213	0.49647	1.4629
AL592402.1	0	0	0	0	0	0	0	0	0	0	0	0	0	0	0	0	0	0	0	0	0	0	0	0	0	0	0	0	0	0	0	0	0	0	0	0	0	0	0	0	0	0	0	0	0	0	0	0	0
AC096639.1	0	0	0	0	0	0	0	0	0	0	0	0	0	0	0	0	0.25397	0	0	0	0	0	0	0	0	0	0	0	0	0	0	0	0	0	0	0.506061	0	0	0	0	0	0.222233	0	0	0	0	0	0	0
LINC00538	0	0.0395809	0.0486975	0	0	0.0678785	0	0	0.0465857	0	0.0608666	0	0.0299527	0.0300284	0.0985749	0	0	0	0	0.0703533	0	0.0731268	0	0	0	0.031098	0.0496398	0.0504427	0	0	0	0	0	0.0425379	0.0521681	0	0.0817826	0	0.0541223	0.036151	0.096723	0	0	0.0504427	0	0	0.0437526	0.0816648	0
LINC00210	0	0	0	0	0	0	0	0	0	0	0	0	0	0	0	0	0	0	0	0	0	0	0	0	0	0	0	0	0	0	0	0	0	0	0	0	0	0	0	0	0	0	0	0	0	0	0	0	0
AL355526.1	0	0	0	0	0	0	0	0	0	0	0	0	0	0	0	0	0	0	0	0	0	0	0	0	0	0	0	0	0	0	0	0	0	0	0	0	0	0	0	0	0	0	0	0	0	0	0	0	0
LINC01710	0	0	0	0	0	0	0	0	0	0	0	0	0	0	0	0	0	0	0	0	0	0	0	0	0	0	0	0	0	0	0	0	0	0	0	0	0	0	0	0	0	0	0	0	0	0	0	0	0
AL360093.1	0.121548	0.119887	0	0.328991	0.156224	0.136828	0.258855	0.273354	0	0	0	0	0	0.0508555	0.125818	0.190196	0.218662	0.114988	0.0986464	0.225009	0	0	0.134235	0	0.108513	0.112899	0.10493	0.317775	0	0	0.0699367	0.133048	0	0	0.12744	0.266272	0.174764	0.568656	0.0647148	0.117218	0	0.130815	0.249202	0.104715	0	0.0976288	0.126244	0.302863	0.069478
AC096642.1	0.561816	0.546044	0.466937	0.36687	0.441409	0.35149	1.03965	0.419196	0.446302	0.476717	0.367647	0.285853	0.31835	0.784316	0.507726	0.347746	0.910826	0.639722	0.487285	0.187894	0.403525	0.216963	0.354184	0.44678	0.289635	0.441872	0.424418	0.584295	0.194214	0.273856	0.784316	0.62124	0.199298	0.32583	0.210282	0.591134	0.283386	0.625413	0.50065	0.224267	0.361991	0.484975	0.646558	0.327033	0.622021	0.348056	0.522433	0.46745	0.478752
AL356364.1	0	0	0	0	0	0	0	0	0	0	0	0	0	0	0	0	0	0	0	0	0	0	0	0	0	0	0	0	0	0	0	0	0	0	0	0	0	0	0	0	0	0	0	0	0	0	0	0	0
AL451081.1	0	0	0	0	0	0	0	0	0	0	0	0	0	0	0	0	0	0	0	0	0	0	0	0	0	0	0	0	0	0	0	0	0	0	0	0	0	0	0	0	0	0	0	0	0	0	0	0	0
AC096644.4	0	0	0	0	0	0	0	0	0	0	0	0	0	0	0	0	0	0	0	0	0	0	0	0	0	0	0	0	0	0	0	0	0	0	0	0	0	0	0	0	0	0	0	0	0	0	0	0	0
AC096644.1	0	0	0	0	0	0	0	0	0	0	0	0	0	0	0	0	0	0	0	0	0	0	0	0	0	0	0	0	0	0	0	0	0	0	0	0	0	0	0	0	0	0	0	0	0	0	0	0	0
RNU6ATAC35P	0.198802	0.15674	0.21492	0	0.474193	0.228138	0.539558	0.186089	0.159497	0	0.164238	0.819153	0	0	0	0	0	0.194046	0	0.363123	0.146946	0.249807	0	0.237516	0.188935	0.140425	0	0.338794	0.208851	0.466937	0.551606	0	0.472661	0	0	0	0	0	0.310471	0.142766	0.420078	0.28365	0	0	0.285304	0	0	0	0.201814
AL445423.1	0.266534	0.876083	0.397986	0.340356	0.743689	0.685177	0.17487	0.554821	0.808206	1.3897	0.122224	0.433497	0.884523	0.364676	0.79033	0	0.501235	0.380608	0.203494	0	0.412982	0.49647	0.564612	0.828515	1.01533	0.750273	0.25455	0.363874	0.385301	0.452689	0.486205	0.175756	0.752414	0.958887	0.616453	0.451568	1.50191	0.870111	1.0592	0.582081	0.452689	0.484975	0	0.561816	0.219716	0.397986	0.313554	0.259131	0.687021
LINC01352	0	0	0.0416362	0	0.137099	0.152547	0	0.227542	0.231982	0.339145	0	0	0.34402	0	0	0	0.118352	0.135025	0	0	0	0.178386	0.144026	0.046865	0.123	0.0973112	0	0	0.0863952	0	0.052302	0	0.0765726	0	0.0986464	0	0.113783	0	0.0752674	0.0544015	0	0.0639811	0	0.0844284	0	0	0	0	0.302008
AL360013.2	0	0	0	0	0	0	0.249202	0	0	0	0	0	0	0	0	0	0	0	0	0	0	0	0	0	0	0	0	0	0	0	0	0	0	0	0	0	0	0	0	0	0	0	0	0	0	0	0	0	0
LINC01655	0	0	0	0	0	0	0	0	0	0	0	0	0	0	0	0	0	0	0	0	0	0	0	0	0	0	0	0	0	0	0	0	0	0	0	0	0	0	0	0	0	0	0	0	0	0	0	0	0
LINC02257	0	0	0	0	0	0	0	0	0	0	0	0	0	0	0	0	0	0	0	0.113929	0	0	0	0	0	0	0	0	0	0	0	0	0	0	0	0	0	0	0	0	0	0	0	0	0	0	0	0	0
LINC02474	0	0	0	0	0	0	0	0	0	0	0	0	0	0.0300284	0	0	0	0	0	0	0	0	0	0	0	0	0	0	0	0	0	0	0	0	0	0	0	0	0	0	0	0	0	0	0	0	0	0	0
LINC01705	0	0	0.0809582	0	0	0	0	0	0	0	0	0	0	0	0	0	0	0	0	0	0	0	0.214396	0	0	0	0	0	0	0	0	0	0	0	0	0	0	0	0	0	0	0	0	0	0	0	0	0	0.139955
AL356108.1	0.121548	0	0.0561975	0	0	0	0	0	0	0	0	0	0.0699922	0	0	0	0	0	0	0	0	0	0	0	0	0	0	0	0	0	0	0	0	0	0	0	0	0	0	0	0	0	0	0	0	0	0	0	0
AL513314.1	0	0	0	0	0	0	0	0	0	0	0	0	0	0	0	0	0	0	0	0	0	0	0	0	0	0	0.33538	0	0	0	0	0	0	0	0	0	0	0	0	0	0	0	0	0	0	0	0	0	0
AL392172.1	2.43752	2.08263	2.04377	2.69937	2.81909	3.1409	1.36846	3.97621	2.0699	2.87438	4.26934	2.25411	3.2096	2.81909	2.56815	2.40914	1.88076	3.1409	2.54807	3.33594	2.37393	2.67559	3.31792	3.27929	3.42641	3.24393	4.14837	3.71703	3.86866	3.42641	2.04377	2.81909	4.26934	3.35397	2.78054	3.38983	3.89555	3.04427	3.38983	4.09222	3.97621	2.67559	3.24393	3.07546	2.95467	3.10824	1.89052	2.69937	4.33931
AC093152.1	0	0	0	0	0	0	0	0	0	0	0	0	0	0	0	0	0	0	0	0	0	0	0	0	0	0	0	0	0	0	0	0	0	0	0	0	0	0	0	0	0	0	0	0	0	0	0	0	0
AL359979.2	0	0	0	0	0	0	0	0	0	0	0	0	0	0	0	0.114224	0	0	0	0	0	0.159604	0	0.0739641	0	0	0	0	0	0	0	0	0	0	0	0	0	0	0	0	0	0.0886302	0	0.072017	0	0	0	0	0
AL359979.1	0	0	0	0	0	0	0	0	0	0	0	0	0	0	0	0	0	0	0	0	0	0	0	0	0	0	0	0	0	0	0	0	0	0	0	0	0	0	0	0	0	0	0	0	0	0	0	0	0
AC138393.3	0.792692	0.480383	0.532361	0.634585	0.843035	0.614125	0.479179	0.347746	0.347435	0	0.316084	0	0.369156	0.364676	0.495852	0.347746	0.564612	0	0.113712	0.152547	0.241292	0.444983	0.461272	0.577125	0.401715	0.415627	0.16439	0.386174	0.44678	0.258353	0.684251	0.648297	0.378048	0.366012	0.484975	0.480383	0.550858	1.22886	0.481778	0.640653	0.514588	0.307328	0.558097	0.191846	0.454111	0	0.111051	0.71909	0.746147
LINC01703	1.51656	0.598522	0.864722	0.812003	0.569388	1.05728	0.615749	1.25501	1.22886	1.51656	1.0592	1.97059	1.52044	0.903833	1.37439	0.962161	1.08879	0.42715	0.723248	1.64056	0.498243	1.0592	0.856309	0.666758	1.25231	1.24451	0.98609	0.511016	0.339495	0.941402	1.08465	1.40534	1.04735	0.598522	0.944732	1.14797	1.63167	0.495852	0.761679	1.15455	0.600012	1.33635	0.573777	1.07869	1.1156	1.18286	1.33083	0.56662	1.33907
LINC01641	0	0	0	0	0	0	0	0	0	0	0	0	0	0	0	0	0	0	0	0	0	0.0731268	0	0	0	0	0	0	0	0	0	0	0	0	0	0	0	0	0	0	0	0	0	0	0	0	0	0	0
IBA57-DT	0.198802	0.283386	0.137369	0	0.190473	0	0.213944	0	0.67583	0	0.164238	0	0.130873	0.215268	0	0	0.104088	0.194046	0.763987	0.207007	0.430385	0	0	0.12744	0	0.258353	0.181119	0.17654	0.208851	0	0.241112	0	0.186089	0.153295	0.150114	0.229304	0	0	0.458598	0.36687	0.245165	0.394804	0.271455	0.115371	0.201975	0	0	0.46745	0.185432
AL670729.3	0	0	0	0	0.137099	0	0	0	0	0	0	0	0	0.0707	0.19968	0.127008	0	0	0.222043	0.152547	0.241292	0.328666	0	0.0860821	0	0.0973112	0	0	0	0.130446	0.0895155	0	0.128965	0.195362	0	0	0	0	0	0	0	0.19989	0.127008	0.072017	0	0	0	0	0
AL137793.1	0	0	0.184421	0.65587	0.137099	0	0.249202	0.117308	0.0994543	0	0.107146	0.154765	0	0	0	0.305903	0.501235	0	0.180173	0	0	0	0.344317	0	0.123	0	0	0	0	0	0.0895155	0.152237	0	0	0	0	0.113783	0	0.116386	0.0889081	0.491085	0	0.114581	0.072017	0.201975	0	0.61793	0	0.121149
TMEM78	0.0580408	0.0395809	0	0	0	0.0678785	0.0759626	0	0.0465857	0	0	0	0.0558893	0.0300284	0	0.101116	0.0605955	0	0	0	0.0721797	0	0	0.0401039	0	0.031098	0.0607777	0	0.0660083	0.074768	0.0328534	0.105873	0.0565176	0.0349649	0	0	0.0420575	0.136733	0.0647148	0.036151	0	0	0	0.0262927	0	0.0416868	0.0362386	0.155008	0
LINC01682	0	0	0	0	0	0	0	0	0	0	0	0	0	0	0	0	0	0	0	0	0	0	0	0	0	0	0	0	0	0	0	0	0	0	0	0	0	0	0	0	0	0	0.24003	0	0	0	0	0	0
LINC01736	0	0	0	0	0.117042	0.136828	0	0	0	0	0	0	0.0699922	0.126691	0	0.505417	0.0925858	0.114988	0	0	0.274375	0	0.315492	0.315768	0.289635	0	0.273856	0.105298	0.37458	0.188388	0.0790515	0	0	0.440486	0.0842421	0	0.102299	0	0	0.156112	0.134888	0	0.263251	0.379738	0	0.289323	0.0824789	0	0
LINC01737	0	0	0	0	0	0	0	0	0	0	0	0	0	0	0	0	0	0	0	0	0	0	0	0	0	0	0	0	0	0	0	0	0	0	0	0	0	0	0	0	0	0	0	0	0	0	0	0	0
AL353052.1	0	0	0	0	0	0	0	0	0	0	0	0	0	0	0	0	0	0	0	0	0	0	0	0	0	0.0566978	0	0	0	0	0	0	0	0	0	0	0	0	0	0	0	0	0	0	0	0	0	0	0
AL353052.2	0	0	0	0	0	0	0	0	0	0	0	0	0	0	0	0	0	0	0	0	0	0	0	0	0	0	0	0	0	0	0	0	0	0	0	0	0	0	0	0	0	0	0	0	0	0	0	0	0
LINC01745	0	0	0	0	0	0	0	0	0	0	0	0	0	0	0	0	0	0	0	0	0	0	0	0	0	0	0	0	0	0	0	0	0	0	0	0	0	0	0	0	0	0	0	0	0	0	0	0	0
LINC01744	0	0	0	0	0	0	0	0	0	0	0	0	0	0	0	0	0	0	0	0	0	0	0	0	0	0	0	0.0504427	0	0	0	0	0	0	0	0	0	0	0	0	0	0.035029	0	0	0	0	0	0	0
LINC01354	1.10499	0.618843	0.454111	2.28732	0.870111	0.899289	2.7678	2.7468	0.762833	2.40914	1.42745	0.783213	2.07627	1.19188	1.20854	2.17857	1.38694	2.20801	0.887458	1.41517	2.12151	1.09081	1.6983	1.08879	1.29744	0.864722	1.41517	0.536664	0.859242	1.42102	0.738556	1.15018	1.89052	1.13691	1.10285	1.21874	2.69937	1.62732	1.07471	1.60406	1.64512	0.743689	2.08263	1.10712	0.698474	0.685177	1.53744	0.613204	0.697552
AL161640.1	0	0	0	0	0	0	0	0	0	0	0	0	0	0	0	0	0	0	0	0	0	0	0	0	0	0	0	0	0	0	0	0	0	0	0	0	0	0	0	0	0	0	0	0	0	0	0	0	0
LINC00184	0.112465	0.0639811	0.0643588	0.108305	0.0538441	0.0937905	0.0759626	0	0.0730065	0.11133	0.0502059	0.10704	0.0368208	0.0300284	0.136733	0.114224	0.0605955	0.12437	0	0.171898	0.0610902	0	0	0.0401039	0.0479195	0	0.0710338	0	0.0771978	0.0877553	0.052302	0.105873	0	0.0349649	0	0	0.102299	0.0742301	0.0428617	0.0889081	0.0665708	0.035029	0.0595464	0.0308068	0.141362	0	0.111051	0	0.0461531
AL160408.5	0	0	0	0	0	0	0	0	0	0	0	0	0	0	0	0	0	0	0	0	0	0	0	0	0	0	0	0	0	0	0	0	0	0	0	0	0	0	0	0	0	0	0	0	0	0	0	0	0
AL160408.1	0	0	0	0	0	0	0	0.117308	0	0	0	0	0.145262	0	0	0	0	0	0	0	0.0844284	0	0	0	0	0	0	0	0	0	0	0	0	0	0	0	0	0	0	0	0	0	0.0849787	0	0	0	0	0	0
AL160408.4	0	0	0	0	0	0	0	0	0	0	0	0	0	0	0	0	0	0	0	0	0	0	0	0	0	0	0	0	0	0	0	0	0	0	0	0	0	0	0	0	0	0	0	0	0	0	0	0	0
AL160408.3	0	0.0327141	0	0	0	0	0	0.0618092	0	0	0	0.0929584	0	0.0227751	0	0	0.0508082	0.0501565	0	0	0	0	0.0895155	0.0333572	0	0.031098	0	0	0.0544015	0.0502553	0.028215	0	0	0	0	0	0.0621069	0	0	0	0	0	0	0.0230708	0.0896522	0.0337191	0	0	0
LINC01132	0.112465	0.109872	0.0486975	0.108305	0.0538441	0	0	0.0618092	0	0.0850772	0.122224	0.0661714	0.0558893	0.142766	0.125818	0.0699367	0.0508082	0.0570073	0.0383504	0.0557975	0.0498668	0.0631919	0.0895155	0.0401039	0.0841812	0.0813551	0.0496398	0.187894	0.0771978	0.074768	0.118688	0.105873	0.107684	0.0425379	0.12744	0	0.0420575	0.136733	0.0541223	0.036151	0.144911	0.0763144	0.104088	0.104715	0.0896522	0.0337191	0.0521215	0.114709	0.169185
AL360294.1	0.0580408	0	0	0	0	0	0	0	0	0	0	0	0	0	0	0	0	0	0	0	0	0	0	0	0	0	0.0406721	0	0	0.0502553	0	0	0	0	0	0	0	0.0742301	0	0	0.0665708	0.0429953	0	0	0	0	0	0	0
AL391832.1	0.363874	0.307633	0	0	0	0	0	0	0	0	0	0	0	0	0	0	0	0	0	0	0	0	0	0	0	0	0	0	0	0	0	0	0	0	0	0	0	0	0	0	0	0	0	0	0	0	0	0	0
AL391832.2	0.209373	0.396802	0.644778	0.267469	0.3581	0.531046	0.163449	0.20092	0.269352	0	0.459662	0.10704	0.615749	0.464806	0.909423	0.13929	0.412059	0.62636	0.186089	0.40122	0.78211	0.105362	0.915586	0.568656	0.729296	0.533679	0	0.408389	0.551606	0.0877553	0.448118	0	0.717008	0.356398	0.429875	0	0.37599	0.421013	0.0752674	0.304254	0	0.451024	0.291584	0.701427	0.498776	0.113856	0.323983	0.425177	0.580789
AL391832.3	0.0921472	0	0	0	0	0	0.17487	0	0	0	0	0.10704	0	0	0	0.13929	0	0	0	0.171898	0.0610902	0.117308	0	0.0552087	0	0	0.0824789	0	0	0	0	0.114581	0	0	0.0617796	0	0	0	0	0	0.105362	0	0	0.0425379	0	0	0	0.155008	0
LINC01348	0.102862	0.129238	0.196926	0.108305	0.0996802	0.170696	0	0.0737704	0.129639	0.0850772	0.188761	0.0929584	0.0558893	0.136141	0.19968	0.0699367	0.194214	0.147819	0.119087	0.0840091	0.161578	0.216963	0.111051	0.0552087	0.141664	0.154124	0.133364	0.123129	0.143923	0.156538	0.0895155	0.0980296	0.0876759	0.0515669	0.0986464	0.21417	0.161473	0.110616	0.0881516	0.0653709	0.166878	0.328341	0.114581	0.0844284	0	0.0738419	0.111051	0.46745	0.139955
AL732292.2	0	0.424418	0.125699	0.267469	0.783213	0.778503	0	0	0.159497	0	0.177517	0.232406	0	0.233204	0.305903	0	0.317124	0	0	0.383198	0.631421	0	0.328341	0	0	0.274116	0.193661	0.20092	0	0.343722	0.263065	0	0	0.153295	0.290983	0.60694	0	0.615749	0.17368	0	0.255492	0.160747	0	0.125109	0	0	0	0.201099	0
AL139161.2	0	0	0	0	0	0	0	0	0	0	0	0	0	0	0	0	0	0	0	0	0	0	0	0	0	0	0	0	0	0	0	0	0	0	0	0	0	0	0	0	0	0	0	0	0	0	0	0	0
AL139161.1	0	0	0	0	0	0	0	0	0	0	0	0	0	0	0	0	0	0	0	0	0.857585	0	0	0	0	0	0	0	0	0	0	0	0	0	0	0	0	0	0	0	0	0	0	0.754772	0	0	0	0	0
AL356010.2	0	0	0	0	0	0	0	0	0	0	0	0	0	0	0	0	0	0	0	0	0	0	0	0	0	0	0	0	0	0	0	0	0	0	0	0	0	0	0	0	0	0	0	0	0	0	0	0	0
LINC01139	0	0.129238	0	0.156897	0.584295	0.0678785	0.56662	0	0.278786	0.168112	0	0.27046	0.102666	0.16296	0	0.0799794	0.270989	0.250508	0	0	0.34213	0.117308	0.430896	0.0552087	0.0601399	0.0973112	0.10493	0.643107	0.514588	0.0877553	0.747172	0.30865	0.172496	0	0	0.404347	0	0.110616	0.481778	0.103693	0.245165	0	0	0	0	0	0.0437526	0.0932692	0.155681
AL359551.1	0	0	0	0	0	0.0563907	0	0.0500885	0	0	0	0	0	0	0	0	0	0	0	0	0	0	0	0	0	0	0	0	0	0	0	0	0	0	0	0	0	0	0	0	0	0	0	0	0	0	0	0	0
AC093426.1	0	0.0327141	0	0.0890443	0	0	0.0845854	0.0500885	0	0	0	0	0	0.0258953	0	0	0	0.0501565	0	0.0557975	0	0	0	0	0	0	0	0	0	0	0	0	0	0	0	0.107563	0	0	0	0	0	0	0	0	0	0.0416868	0	0	0
AL356361.2	0	0	0	0	0.343247	0	0	0	0.159497	0	0.164238	0	0	0	0	0	0	0	0	0	0	0	0	0	0	0	0	0	0	0	0.136637	0	0	0	0	0	0	0	0	0	0	0	0	0	0	0	0	0	0
AL591885.1	0.0664163	0	0.0486975	0	0	0	0	0	0	0	0	0.10704	0	0.0300284	0	0	0.0508082	0	0	0	0.038132	0	0	0	0	0.0386052	0	0	0	0	0	0	0	0	0.0428617	0	0	0	0.0541223	0	0	0	0.0849787	0	0.102924	0.0632845	0	0	0
AL590483.1	0	0	0	0	0	0	0	0	0	0	0	0	0	0	0	0	0	0	0	0	0	0	0	0	0	0	0	0.166069	0	0	0	0	0	0	0	0	0	0	0	0	0	0	0	0	0	0	0	0	0
AL590483.2	0	0	0	0	0	0	0	0	0	0	0	0	0	0	0	0	0	0	0	0	0	0	0	0	0	0	0	0	0	0	0	0	0	0	0	0	0	0	0	0	0	0	0	0	0	0	0	0	0
BX323046.1	0	0.119887	0	0	0	0	0.17487	0	0	0	0	0	0	0.0826448	0	0	0.23264	0	0	0	0.0990901	0.3581	0	0.185666	0	0	0	0	0.156336	0	0	0	0	0.114837	0.115181	0.266272	0	0	0	0	0	0.116056	0	0	0	0.261859	0.111051	0	0
LINC01743	0	0	0.0416362	0	0	0	0	0	0	0	0	0.10704	0	0	0	0	0	0	0.149278	0	0	0	0	0	0	0	0	0	0	0	0.052302	0	0	0	0	0	0	0	0	0	0	0	0	0	0	0	0	0	0
AL591848.3	0.131225	0.190473	0.0643588	0.146309	0.190473	0.3214	0.117503	0.137369	0.138539	0.279512	0.188761	0.154765	0.277891	0.142766	0.19968	0.127008	0.143923	0.237715	0.257293	0.276886	0.257293	0.159604	0.250253	0.208386	0.188935	0.0684425	0.10493	0.166069	0.156336	0.130446	0.175923	0.294478	0.293349	0.139698	0.243559	0.172296	0.138884	0.087163	0.132626	0.201814	0.144911	0.0886302	0.140425	0.182563	0.129713	0.1433	0.223522	0.125263	0.169185
AL591848.2	0	0.21739	0	0.21113	0	0	0	0.156336	0.224402	0	0	0	0.102666	0	0.229831	0	0.244208	0.159604	0.0806179	0	0.115815	0.198081	0	0.560328	0.888913	0	0	0.386174	0	0.145026	0	0.340809	0.472661	0.114837	0.210282	0	0.860899	0	0.132626	0.50065	0.600012	0	0.15303	0.182563	0	0.129128	0.126244	0	0
AL591848.4	0.151365	0.266534	0.153165	0.167542	0.2825	0.3214	0.17487	0.137369	0.138539	0.119319	0.213199	0.17368	0.0699922	0.19477	0.169573	0.190196	0.155547	0.12437	0.0553528	0.152547	0.115815	0.198081	0.154765	0.208386	0.188935	0.232406	0.118201	0.123129	0.130757	0.115687	0.100939	0.294478	0.397183	0.376793	0.210282	0.19968	0.232194	0.292212	0.161246	0.190961	0.144911	0.296696	0.0849787	0.310471	0.267469	0.187343	0.170979	0.114709	0.121149
C1orf229	0.209373	0.234604	0.397986	0.223807	0.296311	0.0937905	0.241112	0.117308	0.231982	0.303184	0.164238	0.32676	0.193256	0.278786	0.157055	0.178099	0.23264	0.12437	0.336657	0.130873	0.219437	0.233204	0.185529	0.216963	0.188935	0.244965	0.0934571	0.20092	0.289011	0.201653	0.284987	0.123774	0.199298	0.338483	0.222043	0.145141	0.208618	0.136733	0.293891	0.21128	0.125699	0.172695	0.249202	0.182563	0.17057	0.1433	0.138884	0.125263	0.139955
AL390728.6	2.68748	3.67179	4.14837	3.01452	2.92872	3.2986	3.76285	3.54582	3.94932	4.14837	4.40899	3.46468	3.58608	5.42362	2.89935	3.1409	3.24393	3.92243	2.95467	3.10824	2.61062	3.54582	3.67179	3.71703	3.54582	3.35397	3.69441	5.09563	3.71703	3.92243	4.26934	4.20716	2.34813	3.86866	3.10824	3.71703	3.54582	2.7468	2.98557	3.35397	3.27929	3.31792	4.71706	3.38983	3.35397	3.76285	3.1409	3.92243	2.61062
AL390728.5	0.112465	0	0	0.252688	0	0	0	0	0	0	0	0	0.0699922	0	0.157055	0.266918	0.0925858	0	0	0	0.0721797	0	0.175566	0	0	0	0	0	0	0	0	0	0	0	0	0	0	0	0	0	0	0.0763144	0.0944701	0.132491	0.17057	0	0	0	0
AC138089.1	0	0	0.0303587	0	0	0	0	0.0737704	0	0	0	0	0	0	0	0	0	0	0	0	0	0	0	0.046865	0	0	0	0	0	0	0	0	0	0	0.0986464	0	0	0	0	0	0	0	0	0.036151	0	0	0.0607777	0	0
AC079779.3	0	0.15674	0	0	0.190473	0	0.163449	0	0.0899951	0	0	0	0	0	0	0	0.0605955	0	0.0806179	0.130873	0.131225	0	0	0.137099	0	0	0	0	0.182563	0	0	0	0	0.0860821	0	0	0	0.151365	0	0.156112	0	0	0.104088	0	0	0.0738419	0	0	0
AC079779.4	0	0	0	0	0	0	0	0	0	0	0	0	0.102666	0	0	0	0	0	0	0	0	0	0	0	0	0	0	0	0	0.130446	0	0	0.142431	0	0.115181	0	0	0	0	0	0	0	0.140425	0	0	0.243009	0.111051	0	0
LINC01865	0	0	0	0	0	0	0.108051	0	0	0.136141	0.0711879	0	0.0558893	0	0	0	0.181428	0	0.0806179	0	0	0	0	0	0.141664	0	0.133364	0	0	0.201653	0.052302	0	0	0	0	0	0.0817826	0.121937	0	0	0.105362	0	0.0754249	0.140733	0	0	0	0	0
AC105393.2	0	0	0	0	0	0	0	0	0	0	0	0	0	0	0	0	0.118352	0	0	0	0	0	0	0	0	0	0	0	0	0	0	0	0	0	0	0	0	0	0	0	0	0	0	0	0	0	0	0	0
AC105393.1	0	0	0	0	0	0	0	0	0	0	0	0	0	0	0	0.114224	0	0	0	0	0	0.271455	0	0.155135	0	0	0	0	0	0	0	0.152237	0	0	0	0	0	0	0	0	0	0	0	0.072017	0	0.381041	0.161246	0	0
LINC01874	0	0	0	0	0	0	0	0	0	0	0	0	0	0	0	0	0	0	0	0	0	0	0	0	0	0	0	0	0	0	0	0	0	0	0	0	0	0	0	0	0	0	0	0	0	0	0	0	0
AC093326.1	0	0.0730557	0	0	0.0996802	0	0	0	0	0	0	0.12273	0	0.186602	0.157055	0.165961	0.205824	0	0	0.0976288	0	0	0	0.0552087	0	0	0.0824789	0	0	0	0.0612724	0	0	0.264915	0	0	0.0817826	0.121937	0	0.128965	0.115602	0.0763144	0.0849787	0.0504427	0	0	0	0	0.0941273
AC092159.1	0	0	0	0	0	0	0	0	0	0	0	0	0	0	0	0	0	0	0.419196	0	0	0	0	0	0	0	0	0	0	0	0	0	0	0	0	0	0	0	0	0	0	0	0	0	0	0	0	0	0
AC116609.2	0	0	0	0	0	0	0	0	0	0	0	0	0	0	0	0	0	0	0	0	0	0	0	0	0	0	0	0	0	0	0	0	0	0	0	0	0	0	0	0	0	0	0	0	0	0	0	0	0
AC116609.1	0	0	0	0	0	0	0	0	0	0	0	0	0	0	0	0	0	0	0	0	0	0	0	0	0	0	0	0	0	0	0	0	0	0	0	0	0	0	0	0	0	0	0	0	0	0	0	0.259131	0
LINC01115	0.121548	0	0.205117	0	0.0699922	0	0	0	0	0	0	0	0	0	0	0	0.133206	0	0	0	0	0	0	0	0.141664	0.0386052	0	0	0	0	0	0.0789544	0.128965	0	0	0	0	0	0.132626	0	0	0	0.0595464	0.0308068	0	0	0	1.29211	0
LINC01939	0	0	0	0	0	0	0.135988	0	0	0	0	0	0	0	0	0	0.0925858	0	0	0	0	0	0	0	0	0.0684425	0	0	0	0	0	0	0	0	0	0	0	0	0	0	0	0	0	0	0	0.0844284	0.0824789	0	0
AC105450.1	0	0	0	0	0	0	0	0	0	0	0	0	0	0	0	0	0	0	0	0	0	0	0	0	0	0	0	0	0	0	0	0	0	0	0	0	0	0	0	0	0	0	0	0	0	0	0	0	0
AC144450.1	0	0	0	0	0	0	0	0	0	0	0	0	0	0	0	0	0	0	0	0	0	0	0	0	0	0	0	0	0	0	0	0	0	0	0	0	0	0	0	0	0	0	0	0	0	0	0	0	0
AC018685.2	0	0	0	0	0	0	0	0	0	0	0	0	0	0	0	0	0	0	0	0	0	0	0	0	0.141664	0	0	0	0	0	0	0	0	0	0	0	0	0	0	0	0	0	0	0	0	0	0	0	0
AC018685.1	0	0	0	0	0	0	0	0	0	0	0	0	0	0	0	0	0	0	0	0	0	0	0	0	0	0	0	0	0	0	0	0	0	0	0	0	0	0	0	0	0	0	0	0	0	0	0	0	0
AC011995.2	0	0	0	0	0	0	0	0	0	0	0	0	0	0	0	0	0	0	0	0	0	0	0	0	0	0	0	0	0	0	0	0	0	0	0	0	0	0	0	0	0	0	0	0	0	0	0	0	0
AC011995.1	0	0	0	0	0	0	0	0	0	0	0	0	0	0	0	0	0	0	0	0	0	0	0	0	0	0	0	0	0	0	0	0	0	0	0	0	0	0	0	0	0	0	0	0	0	0	0	0	0
LINC01250	0	0	0	0	0	0	0.0759626	0.0500885	0	0	0	0	0	0	0	0	0	0	0	0	0	0	0	0	0	0	0	0	0	0	0	0	0	0	0	0	0	0	0	0.036151	0	0.035029	0	0.0262927	0.102924	0	0	0	0
AC019118.2	0	0	0	0	0	0	0	0	0	0	0	0	0.0699922	0.0508555	0	0	0	0	0	0	0	0.129456	0	0	0	0	0	0	0	0	0	0	0	0	0	0	0	0	0	0.0763144	0	0	0.21113	0	0	0	0	0	0
AC019118.1	0	0	0	0	0	0	0	0	0	0	0	0	0	0	0	0	0	0	0	0	0	0	0	0	0	0	0	0	0	0	0	0	0	0	0	0	0	0	0	0	0	0	0	0	0	0	0	0	0
AC114810.1	0.179662	0.362327	0.275007	0	0.666758	0.207007	0.495317	0	0.458598	0.25426	0.502499	0.211772	0.543364	0.202702	0	0.651462	0.491626	0.560328	0.370365	0	0.772688	0.419196	0.277891	0.487285	0.57515	0.441872	0	0.3096	0.182563	0.422032	0.493177	0.374185	0	0.366012	0.461822	0.298224	0.731322	0.374976	0.419196	0.418347	0.220691	0.130815	0.652502	0.210123	0.267469	0.15674	0.473486	0.170445	0.697552
AC108488.1	1.64512	2.27125	2.17857	1.44373	2.69937	2.27929	2.40012	2.35747	3.42641	2.52555	2.62088	1.13691	2.56815	2.39111	2.3388	2.49651	2.58798	1.60406	2.92872	1.82	2.4767	3.2096	1.67019	2.50603	2.41852	1.67495	2.24685	3.19257	2.49651	2.66461	2.44713	1.95873	1.88076	2.84667	1.99507	2.23959	2.00174	1.56793	2.04377	1.89052	2.7468	1.79989	2.58798	1.90117	3.17555	2.13523	2.44713	2.61062	2.66461
AC012445.1	0	0	0	0	0	0	0	0	0	0	0	0	0	0	0	0	0	0.12437	0	0	0	0	0	0	0	0	0	0	0	0	0	0	0	0	0	0	0	0	0	0	0	0	0	0	0	0	0	0	0
LINC01249	0	0	0	0	0	0	0	0	0	0	0	0	0	0	0	0	0	0	0	0.171898	0	0	0	0	0	0	0	0	0	0	0	0	0	0	0.0353593	0	0	0	0.0428617	0	0	0	0.0409732	0	0	0.0337191	0	0	0
AC107057.1	0	0	0	0	0	0	0	0	0	0	0	0	0	0	0	0	0	0	0	0	0	0	0	0	0	0	0	0	0	0	0	0	0	0	0	0	0	0	0	0	0	0	0	0	0	0	0	0	0
AC010729.1	0	0	0	0	0	0	0	0	0	0	0	0	0	0	0	0.0528177	0	0	0	0	0	0	0	0	0	0	0	0	0	0	0	0	0	0	0	0	0	0	0	0	0	0	0	0	0	0	0	0	0
LINC01810	0	0	0	0	0	0	0	0	0	0	0	0	0	0	0	0	0	0	0	0	0	0	0	0	0	0	0	0	0	0	0	0	0	0	0	0	0	0	0	0	0	0	0	0	0	0	0	0	0
AC017053.1	0	0	0	0	0	0	0	0	0	0	0	0	0	0	0	0	0	0	0	0	0	0	0	0	0	0	0	0	0	0	0	0	0	0	0	0	0	0	0	0	0	0	0	0	0	0	0	0	0
LINC01247	0	0	0	0	0	0	0	0	0	0	0	0	0	0	0	0	0	0	0	0	0	0	0	0	0	0	0	0	0	0	0	0	0	0	0	0	0	0	0	0	0	0	0	0	0	0	0	0	0
LINC01824	0	0	0	0	0	0	0	0	0	0	0	0	0	0	0	0	0	0	0	0	0	0	0	0	0	0	0	0	0	0	0	0	0	0	0	0	0	0	0	0	0	0	0	0	0	0	0	0	0.155681
MIR7515HG	0	0	0.0809582	0	0	0	0	0	0.0899951	0	0	0	0	0	0	0	0	0	0	0	0	0	0	0	0	0	0	0	0	0	0	0	0	0	0	0	0	0	0	0	0	0	0	0	0	0.187343	0	0	0
LINC00487	0.420078	0.0489065	0.714133	0.0890443	0.117042	0.207007	0	0.227542	0.347435	0.0935807	0.188761	0.137522	0	0.333096	0.452112	0.114224	0.25397	0.12437	1.10285	0	0.038132	0.1433	0.344317	0.19968	0.123	0.174187	0.118201	0.113642	0	0.130446	0.372331	0.0896522	0.222696	0.0349649	0.161123	0.404347	0.113783	0	0	0.224267	0.277149	0.0886302	0.114581	0.0262927	0.201975	0.0738419	0.304254	0	0.155681
LINC01871	0	0	1.22634	0	0	0	0.744918	0	0.480383	0	0.644778	0.636086	0	1.15455	0	0	1.39564	0	0	0	0.430385	0	0	0.403525	0	2.10893	0	0.612429	0.798692	0	0	0	0	0.461822	0.501235	0	0	0	0.543364	0	0	0.837692	0	1.05536	0	0	0.501819	2.10893	0.632931
AC007463.1	0	0	0	0	0	0	0	0.101316	0	0	0	0	0	0	0.157055	0	0	0	0	0	0	0	0	0	0	0	0	0	0	0	0	0	0	0	0	0.185946	0	0	0	0	0.3096	0	0	0	0	0.227357	0	0	0
LINC00298	0.0580408	0.0395809	0	0	0	0.0678785	0	0	0.0465857	0	0	0	0	0	0	0	0	0.0570073	0.0415507	0	0	0	0	0	0	0	0	0	0	0	0	0	0	0	0	0	0	0	0	0.0451138	0	0	0.049917	0	0	0	0	0.0584458	0.0461531
LINC00299	0.0580408	0.15674	0.0416362	0.0890443	0.0699922	0.0563907	0	0	0.0899951	0	0.0391027	0.154765	0	0.0938491	0.107398	0	0	0.0570073	0.0615802	0	0	0.1433	0.122371	0.0739641	0.0601399	0.140425	0.0496398	0.0658188	0	0	0	0	0.0876759	0.0996802	0.0428617	0.119758	0	0	0.0541223	0.21128	0	0.0523496	0.140425	0.210123	0	0.0632845	0.0704447	0.364275	0
U91324.1	0	0	0	0	0	0	0	0	0	0	0	0	0	0	0	0	0	0	0	0	0	0	0	0	0	0	0	0	0	0	0	0	0	0	0	0	0	0	0	0	0	0	0	0	0	0	0	0	0
LINC01814	0.170979	0.0730557	0.21492	0.108305	0.0996802	0.107146	0.0688976	0.101316	0.536036	0.127555	0.459662	0	0.25397	0.0601399	0.609427	0.437043	0.0810574	0.463881	0.217788	0.0557975	0.438613	0.105362	0.0895155	0.108409	0.141664	0.0684425	0.0406721	0.0743268	0.0771978	0.452689	0.0790515	0.0789544	0.706461	0.276623	0.0723851	0.684251	0.0817826	0.110616	0.116386	0.355765	0.0768486	0.101474	0.0944701	0.0308068	0.17057	0.0632845	0.0953538	0.0816648	0.0811566
AC011747.1	0	0	0	0	0	0	0	0	0	0	0	0	0	0	0	0	0	0	0	0.152547	0	0	0	0	0	0	0	0	0	0	0	0	0	0	0	0	0	0	0	0	0	0	0	0	0	0	0	0	0
AC093904.4	0	0.175923	0	0	0	0	0	0	0	0.103103	0	0	0	0	0	0	0	0	0	0.0557975	0	0	0	0	0	0	0	0	0	0	0	0	0	0.0349649	0	0	0	0	0	0	0	0	0	0	0	0	0	0	0
AC093904.3	0	0	0	0	0	0	0.311183	0	0	0	0	0	0	0	0	0	0	0	0	0	0	0	0	0	0	0	0	0	0	0	0	0	0	0	0	0	0	0	0	0	0	0	0	0	0	0	0	0	0
AC093904.1	0	0	0	0	0	0	0	0	0	0	0	0	0	0	0	0	0	0	0	0	0	0	0	0	0	0	0	0	0	0	0	0	0	0	0	0	0	0	0	0	0	0	0	0	0	0	0	0	0
AC073195.1	0.468049	0.562504	0.603361	0.196086	0.441409	0.0937905	0.762833	0.363498	0.42758	0.290394	0.304254	0.433497	0.33273	0.60694	0	0.397565	0.412059	0.322057	0.664204	0.293349	0.438613	0.105362	0.144026	0.185666	0.141664	0.0566978	0.346259	0.481778	0.208851	0.188388	0.223522	0.243376	0.414213	0.532361	0.508391	0	0.174764	0.374976	0.350529	0.355765	0.491085	0.936734	0.386174	0.0425379	0.465841	0.187343	0.313554	0.302863	0.218791
AC082651.1	0	0	0	0	0	0	0	0	0	0	0	0	0	0	0	0	0	0	0.128965	0	0	0.117308	0	0.0552087	0	0	0	0	0	0	0	0	0	0	0	0	0	0	0	0	0	0	0	0	0	0	0	0	0
AC082651.4	0	0	0	0	0	0	0	0	0	0	0	0	0	0	0	0	0	0	0	0	0	0	0	0	0	0	0	0	0	0	0	0	0	0	0	0	0	0	0	0	0	0	0	0	0	0	0	0	0
AC082651.3	0.0580408	0	0.0486975	0	0	0	0	0	0.064601	0.201363	0	0	0.0451138	0.0258953	0	0.0699367	0	0.0570073	0.0502827	0	0.0844284	0	0	0	0	0.0464287	0	0.0504427	0	0.0502553	0.0328534	0.142101	0.0565176	0.0425379	0	0.119758	0.0508555	0	0	0.0544015	0	0.0523496	0	0.0262927	0	0	0.0437526	0.0695902	0.0570073
AC010969.2	0.634585	0.381041	0.37599	0.280006	0.527747	0.518051	0.50368	0.482224	0.458598	0.595611	0.727251	0.618843	0.381855	0.581424	0.463881	0.297058	0.38741	0.598522	0.400255	0.472183	0.403525	0.512945	0.43958	0.44678	0.57515	0.441872	0.526036	0.666758	0.400255	0.536036	0.514588	0.833803	0.331093	0.611655	0.417036	0.573175	0.339495	0.398407	0.458598	0.50065	0.452689	0.451024	0.591134	0.571869	0.385756	0.300474	0.336657	0.742685	0.441409
AC104794.2	2.09589	0.618843	2.42791	3.97621	1.1262	2.42791	3.81408	2.10893	2.69937	2.28732	2.16443	1.89052	2.49651	1.77192	2.00174	2.3388	2.25411	2.98557	3.17555	2.65363	1.98889	2.0699	2.08926	3.86866	2.37393	2.0084	2.04377	1.67019	2.65363	1.92485	2.3217	1.7302	2.0501	1.37439	1.82991	2.89935	2.50603	2.27125	2.63113	2.08263	3.22676	1.90117	2.37393	2.54807	2.42791	2.31292	2.58798	1.18706	2.23959
AC104794.1	0	0	0	0	0	0	0	0	0	0.529786	0	0	0	0	0	0	0	0	0	0	0	0	0	0	0	0	0	0	0	0	0	0	0	0	0	0	0	0	0	0	0	0	0	0	0	0	0	0	0
RN7SL832P	0.363874	0.283386	0.205117	0.146309	0.222696	0.121716	0.204551	0.137369	0.269352	0.103103	0.316084	0.32676	0.240208	0.240385	0	0.297058	0.104088	0.250508	0.190473	0.152547	0.184631	0.105362	0.144026	0.3096	0.339495	0.0684425	0.304254	0.348673	0.254765	0.312462	0.213785	0.274375	0.364275	0.264915	0.290983	0.185946	0.252474	0	0.186481	0.355765	0.339926	0.222233	0.30865	0.235958	0.141362	0.202175	0.184029	0.104843	0.312259
AC092687.2	0	0	0	0	0	0	0	0	0	0	0	0	0	0	0	0	0	0	0	0	0	0	0	0	0	0	0	0	0	0	0	0	0	0	0	0	0	0	0	0	0	0	0	0	0	0	0	0	0
AC092687.3	0.579348	0.654973	0.267194	0.744918	0.765113	1.02102	0.832366	1.20854	0.823073	0	0.538917	0.805807	0.82587	0.152237	0	0.397565	0.835098	0.43648	0.432482	0.928783	1.79155	0.756933	0.897857	0.532361	0.759484	0.164238	0.581424	0.227163	1.44373	1.40534	0.306287	1.29211	0.222696	0.484324	0.171139	0.711273	0.381041	0.690903	0.381041	0.440486	0.968838	0.484975	0.23072	0.277605	0.35101	1.24706	1.35035	0.552898	1.31408
LINC01954	0	0	0	0	0	0	0	0	0	0	0	0	0.130873	0.104405	0	0	0	0	0.194046	0.187894	0	0	0	0	0	0	0	0	0	0	0	0	0	0	0.138051	0.3164	0	0	0	0	0.23264	0	0	0	0	0	0.380608	0	0
AC099344.1	0	0	0	0	0	0	0	0	0	0	0	0	0	0	0	0	0	0	0	0	0	0	0	0	0	0.0464287	0	0	0	0	0	0	0	0	0	0	0	0	0	0	0	0	0	0	0	0	0	0	0
AC099344.2	0	0	0	0	0	0	0	0	0	0	0	0	0	0	0	0	0	0	0	0	0	0	0	0	0	0	0	0	0	0	0	0	0	0	0	0	0	0	0	0	0	0	0	0	0	0	0.0953538	0	0
LINC00570	0	0.0730557	0.0353593	0	0	0	0	0	0.0813551	0.11133	0.0502059	0	0.0368208	0.0420811	0	0	0	0.0667603	0.0735347	0	0.0498668	0.328666	0	0.0401039	0	0	0	0	0	0	0	0	0	0.0425379	0	0	0	0	0	0.0451138	0	0	0	0.0844284	0	0.494781	0	0	0
AC106875.2	0	0	0	0	0	0	0	0	0	0	0	0	0	0	0	0	0	0	0	0	0	0	0	0	0	0	0	0	0	0	0	0	0	0	0	0	0	0	0	0	0	0	0	0	0	0	0	0	0
MIR3681HG	0	0	0	0	0	0	0	0	0	0	0	0	0	0	0	0	0	0	0	0	0	0	0	0.117879	0	0	0	0	0	0	0	0	0	0	0	0	0	0	0	0	0	0	0	0	0	0	0	0	0
AC096559.1	0	0	0	0	0	0	0	0	0	0	0	0	0	0	0	0	0	0	0	0	0	0	0	0	0	0	0	0	0	0	0	0	0	0	0	0	0	0	0	0	0	0	0	0	0	0	0	0	0
AC009486.1	0.102862	0	0.132244	0	0.0996802	0	0	0	0	0	0	0	0.117983	0	0.32676	0	0.0810574	0	0	0.0976288	0	0.117308	0.154765	0	0	0	0.0824789	0.218791	0	0.0877553	0.112134	0.114581	0	0	0	0	0	0.275689	0	0	0	0	0.0849787	0	0	0.214781	0.0704447	0.890368	0.0941273
AC073062.1	0	0	0.116846	0	0.190473	0	0.520622	0	0.148781	0	0	0.537291	0.130873	0.115138	0	0	0	0.194046	0	0.187894	0	0	0	0	0	0.140425	0.316762	0	0.365125	0	0.241112	0	0.451024	0.139698	0.484975	0	0	0	0.293891	0	0.23264	0.381041	0.183474	0.115371	0.481333	0	0	0	0
LINC00276	0	0	0	0	0	0	0	0	0	0	0	0	0	0	0	0	0	0	0	0	0	0	0	0	0	0	0.118201	0	0	0	0	0	0	0	0	0	0	0	0	0	0	0	0	0.0230708	0	0	0	0	0
AC011897.1	0	0	0	0	0	0	0	0	0	0	0	0	0	0	0	0	0	0	0	0	0	0	0	0	0	0	0	0	0	0	0	0	0	0	0	0	0	0	0	0	0	0	0	0	0	0	0	0	0
AC068286.1	0	0	0	0	0	0	0	0	0	0	0	0	0.130873	0	0	0	0	0	0	0	0	0	0	0	0	0	0.16439	0	0	0	0	0	0	0	0	0	0	0	0	0	0	0	0	0	0	0	0	0	0
LINC01804	0	0	0	0	0	0	0	0	0	0	0	0	0	0	0	0	0	0	0	0	0	0	0	0	0	0	0	0	0	0	0	0	0	0	0	0	0	0	0	0	0	0	0	0	0	0	0	0.0816648	0
AC113608.2	0	0	0	0	0	0	0	0	0	0	0	0	0	0	0	0	0	0	0	0	0	0	0	0	0	0	0	0	0	0	0	0	0	0	0	0	0	0	0	0	0	0	0	0	0	0	0	0	0
MYCNUT	0	0	0.0416362	0	0	0	0	0	0	0	0	0	0	0	0	0	0	0	0	0	0	0	0	0	0	0	0	0	0	0	0	0	0	0	0	0	0	0	0	0	0	0	0	0	0	0	0	0	0.069478
AC010145.1	0	0	0	0	0	0	0	0	0	0	0	0	0	0	0	0	0	0	0	0	0	0	0	0	0	0	0	0	0	0	0	0	0	0	0	0	0	0	0	0	0	0	0	0	0	0	0	0	0
GACAT3	0	0	0	0.23674	0	0	0	0	0	0	0	0.0929584	0.117983	0	0	0	0	0	0	0	0	0	0	0	0.0721797	0	0	0	0	0	0	0	0	0.139698	0	0	0	0	0	0	0	0	0	0.140733	0	0	0	0	0
AC130710.1	0	0	0	0	0	0	0	0	0	0	0	0	0	0	0	0	0	0	0	0	0	0	0	0	0	0	0	0	0	0	0	0	0	0	0.161123	0	0	0	0	0	0	0	0	0	0	0	0	0	0
AC010745.1	0	0	0	0	0	0	0	0	0	0	0	0	0	0	0	0	0	0	0	0	0	0	0	0	0	0	0	0	0	0	0	0	0	0	0	0	0	0	0	0	0	0	0	0	0	0	0	0	0
AC010745.2	0	0	0	0	0	0	0	0	0	0	0	0	0	0	0	0	0	0	0	0	0	0	0	0	0	0	0	0	0	0	0	0	0	0	0	0	0	0	0	0	0	0	0	0	0	0	0	0	0
AC010745.3	0	0	0	0	0	0	0	0	0	0	0	0	0	0	0	0	0	0	0	0	0	0	0	0	0	0	0	0	0	0	0	0	0	0	0	0	0	0	0	0	0	0	0	0	0	0	0	0	0
AC010745.4	0	0	0	0	0	0	0	0	0	0	0	0	0	0	0	0	0	0	0	0	0	0	0	0	0	0	0	0	0	0	0	0	0	0	0	0	0	0	0	0	0	0	0	0	0	0	0	0	0
AC010880.1	0	0	0	0	0	0	0	0	0	0	0	0	0	0	0	0	0	0	0	0	0	0	0	0	0	0	0	0	0	0	0	0	0	0	0	0	0	0	0	0	0	0	0	0	0	0	0	0	0
AC008164.1	0	0	0	0	0	0	0	0	0	0	0	0	0	0	0	0	0	0	0	0	0	0	0	0	0	0	0	0	0	0	0	0	0	0	0	0	0	0	0	0	0	0	0	0	0	0	0	0	0
LINC01866	0	0	0	0	0	0	0	0	0	0	0	0	0	0	0	0	0	0	0	0	0	0	0	0	0	0	0	0	0	0	0	0	0	0	0	0	0	0	0	0	0	0	0	0	0	0	0	0	0
AC079148.1	0.162355	0.175923	0.125699	0.452112	0.474193	0.425567	0.320429	0.650741	0.320776	0.727251	0.276182	0.477213	0.35503	0.278786	0.32676	0.0799794	0.400725	0.340356	0.174368	0.565936	0.498243	0.614125	0.154765	0.2825	0.0841812	0.207659	0.148781	0.338794	0.50418	0.435917	0.247329	0.464355	0.441872	0.387001	0.279244	0.280533	0.339495	0.19968	0.381041	0.339495	0.266272	0.130815	0.531704	0.408389	0.153667	0.214781	0.380608	0.541391	0.232873
AC106053.1	0	0.224267	0	0	0	0	0	0	0	0	0	0	0	0	0	0	0	0	0	0	0	0	0	0	0	0	0	0	0	0	0	0	0	0	0	0	0	0	0	0	0	0	0	0	0	0	0	0	0
LINC01376	0.275348	0.832366	0.224267	0.424418	0.343247	0.518051	0.615749	0.468049	0.446302	0.388633	0.502499	0.477213	0.590325	0.301421	0.42848	0.482224	0.434492	0.62636	0.233656	0.724226	0.364275	0.328666	0.609427	0.438613	0.662327	0.750273	0.540795	0.3096	0.409572	0.688981	0.330421	0.606176	0.618843	0.743689	0.669574	0.466424	0.657701	1.01712	0.381041	0.355765	0.35149	0.268886	0.19307	0.48928	0.520021	0.484324	0.688981	0.46745	0.399395
AC010096.1	0	0	0	0	0	0	0	0	0	0	0	0	0	0	0	0	0	0	0	0	0	0	0	0	0	0	0	0	0	0	0	0	0	0	0	0	0	0	0	0	0	0	0	0	0	0	0	0	0
LINC01808	0	0	0	0	0	0	0	0	0	0	0	0	0	0	0	0	0	0	0	0	0	0	0	0.0552087	0	0	0	0	0.105873	0	0	0	0	0	0	0	0	0	0	0	0	0	0	0	0	0	0	0	0
AC019055.1	0	0	0	0	0	0	0	0	0	0	0	0	0	0	0	0	0	0.204551	0	0	0	0	0	0	0	0	0	0	0	0	0	0	0	0	0	0	0	0	0	0	0	0	0	0	0	0	0	0	0
LINC00954	0.179662	0.0907908	0.160052	0	0.117042	0.107146	0.0922865	0.156336	0.138539	0.146148	0.0947576	0.0661714	0.102666	0.0601399	0.089104	0.0528177	0.168686	0.105125	0.0456669	0.0703533	0.184631	0.31441	0.0991511	0.0739641	0.108513	0.0464287	0.0710338	0.210736	0.130757	0.074768	0.0612724	0.123774	0.0565176	0.127692	0.0842421	0.145141	0.138884	0.0996123	0.186481	0.0653709	0.144911	0.0886302	0.0849787	0.170445	0.117308	0.0844284	0.126244	0.114709	0.185432
AC098828.2	0.140425	0	0	0	0	0	0	0.137369	0	0	0	0	0	0	0	0	0	0.135025	0	0.152547	0.184631	0	0	0	0	0.0973112	0	0.236106	0	0.130446	0	0	0.233656	0	0	0	0.113783	0	0	0.103693	0	0	0	0	0	0	0	0	0
AC098828.3	0.102862	0	0.144781	0	0	0	0	0.101316	0	0.353712	0	0	0	0	0	0.0903218	0	0.105125	0	0.113929	0	0	0	0	0.172296	0	0	0	0.105873	0	0	0	0	0.139698	0	0	0.0916209	0	0	0	0	0	0.0944701	0	0	0.15674	0.138884	0	0
AC023137.1	0	0	0	0	0	0	0	0	0	0	0	0	0	0	0	0	0	0	0	0	0	0	0	0	0	0	0	0	0	0	0	0	0	0	0	0	0	0	0	0	0	0	0	0	0	0	0	0	0
AC012065.4	0.284526	1.28398	1.85085	0.43958	0.506705	0.82587	0.417036	0.828515	0.567303	0.727251	0.417482	0.285853	0.643943	1.11126	0.800055	1.00639	1.22634	1.53407	1.59545	0.615046	0.891823	0.614125	0.82037	1.55997	1.0969	0.796144	1.20399	0.0504427	1.08677	1.05132	0.397986	0.274375	1.04153	0.0996802	0.777363	0.493177	0.469207	0.421013	0.310471	1.11768	0.899289	0.515058	1.02274	1.66205	0.903833	1.3897	1.26016	0.696544	0.762833
AC012361.1	0	0	0	0	0	0	0	0	0	0	0	0	0	0	0	0	0	0	0	0	0	0	0	0	0	0	0	0	0	0	0	0	0	0	0	0	0	0	0	0	0	0	0	0	0	0	0	0	0
AC115619.1	0	0	0	0	0	0	0.108051	0.0874334	0	0	0	0	0	0	0	0	0	0.0844284	0	0	0	0	0	0	0	0	0	0	0	0	0	0	0.0565176	0	0.0617796	0	0	0	0	0	0	0	0	0	0	0.0416868	0	0	0
AC018742.1	0	0.234604	0	0	0	0.188935	0	0.156336	0	0	0.137099	0	0.117983	0	0	0	0	0	0	0	0.209578	0.216963	0	0.108409	0	0	0	0	0.170241	0	0	0	0	0	0	0	0	0	0	0	0.196926	0.116056	0	0.0958273	0	0	0	0	0
AC011752.1	0	0	0	0	0	0	0	0	0	0	0	0	0	0	0	0	0	0	0	0	0	0	0	0	0	0	0	0	0	0	0	0	0	0	0	0	0	0	0	0	0	0	0	0	0	0.227357	0	0	0
AC009411.2	0	0	0	0	0	0	0	0	0	0	0	0	0	0	0	0	0	0	0	0	0	0	0	0	0	0	0	0	0	0	0	0	0	0	0	0	0	0	0	0	0	0	0	0	0	0	0	0	0
AC009411.1	0	0	0	0	0	0	0	0	0	0	0	0	0	0	0	0	0	0	0	0	0	0	0	0	0	0	0	0	0	0	0	0	0	0	0	0	0	0	0	0	0	0	0	0	0	0	0	0	0
LINC01822	0	0	0	0	0	0	0	0	0	0.0935807	0	0	0	0	0	0	0	0	0	0	0	0	0	0	0	0	0	0	0	0	0	0	0	0	0	0	0	0	0	0	0	0	0	0	0	0	0	0	0
AC096570.1	0	0	0	0	0	0	0	0	0	0	0	0	0	0	0	0	0	0	0	0	0	0	0	0	0	0	0	0	0	0	0	0	0	0	0	0	0	0	0	0	0	0	0	0	0	0	0	0	0
AC096570.2	0	0	0	0	0	0	0	0	0	0	0	0	0	0	0	0	0	0	0	0	0	0	0	0	0	0	0	0	0	0	0	0	0	0	0	0	0	0	0	0	0	0	0	0	0	0	0	0	0
AC018467.1	0	0	0	0	0	0	0	0	0	0	0	0	0	0	0	0	0	0	0	0	0	0	0	0	0	0	0	0	0	0	0	0	0	0	0	0	0	0	0	0	0	0	0	0	0	0	0	0	0
AC012506.1	0	0	0	0	0	0	0	0	0	0	0	0	0	0	0	0	0	0	0	0	0	0	0	0	0	0	0	0	0	0	0	0	0	0	0	0	0	0	0	0	0	0	0	0	0	0	0	0	0
AC012506.3	0	0	0	0	0	0	0	0	0	0	0	0	0	0	0	0	0	0	0	0	0	0	0	0	0	0	0	0	0	0	0	0	0	0	0	0	0	0	0	0	0	0	0	0	0	0	0	0	0
AC012506.2	0	0	0	0	0	0	0	0	0	0	0	0	0	0	0	0	0	0	0	0	0	0	0	0	0	0	0	0	0	0	0	0	0	0	0	0	0	0	0	0	0	0	0	0	0	0	0	0	0
AC012506.4	0	0	0	0	0	0	0	0	0	0	0	0	0	0	0	0	0	0	0	0	0	0	0	0	0	0	0	0	0	0	0	0	0	0	0	0	0	0	0	0	0	0	0	0	0	0	0	0	0
AC012074.1	0.0664163	0.341102	0.0416362	0.099212	0.458035	0.264267	0.0845854	0.137369	0.119629	0.103103	0.188761	0.521828	0.0558893	0.136141	0.214781	0.178099	0.0508082	0.0667603	0.154389	0.207007	0.0498668	0.1433	0.111051	0.146026	0.141664	0.0566978	0.382237	0.105298	0.0660083	0.386174	0.168112	0.0789544	0.142431	0.0860821	0.161123	0.248543	0	0	0.132626	0.258353	0.105362	0.420528	0.104088	0.408389	0.444027	0.0416868	0.0607777	0.0695902	0.0570073
LINC01460	0	0	0.026965	0	0	0	0	0	0.0388806	0	0	0	0.0368208	0.0227751	0.0985749	0	0	0	0	0	0	0	0	0.0333572	0.0601399	0.0464287	0	0.0743268	0.0544015	0	0	0	0	0.0349649	0	0	0	0.0742301	0	0	0	0.035029	0.0409732	0.0230708	0.0896522	0	0	0	0
AC104695.1	0	0	0	0	0	0	0	0	0	0	0	0	0	0	0	0	0	0	0	0	0	0	0	0	0	0	0	0	0	0	0	0	0	0	0	0	0	0	0	0	0	0	0	0	0	0	0	0	0
AC097724.1	0	0.168112	0	0	0.3581	0	0	0	0	0	0	0	0	0	0	0	0	0	0	0	0	0	0	0	0	0	0	0	0	0	0	0	0	0	0	0	0	0.259131	0	0	0	0.160747	0	0	0	0	0	0	0
LINC01936	0.188575	0.20052	0.0561975	0.117784	0.3581	0.121716	0.0845854	0.241908	0.056587	0.397183	0.0947576	0.12273	0.0299527	0.215268	0.0985749	0.0699367	0.0413799	0.0667603	0.0898529	0	0.0498668	0.105362	0.175566	0.117879	0.188935	0.0684425	0.294179	0.0504427	0.130757	0.0625547	0.223522	0.0789544	0.222696	0.114837	0.115181	0.133206	0.149829	0.0996123	0.186481	0.128965	0.0869166	0.0639811	0.114581	0.0504427	0.0896522	0.0632845	0	0.104843	0.218791
LINC01946	0	0	0	0	0	0	0	0	0	0	0	0	0	0	0	0	0	0	0	0	0	0	0	0	0	0	0	0	0	0	0	0	0	0	0	0	0	0	0	0	0	0	0	0	0	0	0	0	0
AL121652.1	0	0.15674	0	0	0.190473	0	0	0.186089	0	0	0	0	0	0.310169	0	0.178099	0.168686	0	0	0	0	0	0.302863	0.333465	0.188935	0	0.181119	0.17654	0.208851	0	0.136637	0	0	0.276623	0	0.335028	0.174764	0.407939	0.161246	0.142766	0.245165	0.145484	0.183474	0	0	0.171898	0	0	0
AL121658.1	0	0.259418	0.235958	0.252688	0.369156	0.425567	0.299933	0.186089	0.215716	0	0.0831862	0.232406	0.25397	0.491085	0.285621	0.0903218	0.23264	0.330099	0.280006	0	0.198288	0.249807	0.596339	0.185666	0	0.140425	0.382237	0.327714	0.194214	0.244765	0.347049	0	0.451024	0.0734772	0.325559	0	0.402586	0.3164	0.381041	0.190961	0.220691	0.340809	0.24003	0.0504427	0	0.0844284	0.281123	0.31745	0.276182
AL133245.1	0.0664163	0.145904	0.166369	0.135816	0.137099	0.384845	0	0.0874334	0	0.11133	0.137099	0.154765	0.0847062	0.16296	0.147045	0.114224	0.0810574	0.135025	0	0.0976288	0.146946	0.0847062	0.122371	0.165383	0.302542	0.0566978	0.0824789	0.0889081	0.130757	0.188388	0.0398842	0	0.186089	0.0734772	0.0986464	0.133206	0.138884	0.121937	0.0541223	0.0451138	0.115602	0.0429953	0.15303	0.0308068	0	0.113856	0.0704447	0.104843	0
LINC00486	0	0	0	0	0	0.121716	0	0	0	0	0	0	0	0	0	0	0	0	0	0	0	0	0	0.064504	0	0	0	0	0	0	0	0.133048	0	0	0	0	0	0	0	0	0	0	0	0	0.17057	0	0	0	0
AL121656.1	0	0	0	0	0	0	0	0	0	0	0	0	0	0	0	0	0	0	0	0	0	0	0	0	0	0	0	0	0	0	0	0	0	0	0	0	0	0	0	0	0	0	0	0	0	0	0	0	0
LINC01318	0	0	0	0	0	0	0	0	0	0	0	0	0	0	0	0	0	0	0	0	0	0	0	0	0	0	0	0	0	0	0	0	0	0	0	0	0	0	0	0	0	0	0	0	0	0	0	0	0
AC073218.2	0	0	0	0	0	0	0	0	0	0	0	0	0	0	0	0	0	0	0	0	0	0	0	0	0	0	0	0	0	0	0	0	0	0	0	0	0	0	0	0.0889081	0	0	0	0.253153	0	0	0	0	0
AC073218.1	0	0	0	0	0	0	0	0	0	0	0	0	0	0	0	0	0	0	0	0	0	0	0	0	0	0	0	0	0	0	0	0	0	0	0	0	0	0	0	0	0	0	0	0	0	0	0	0	0
AC012593.1	0	0	0	0	0	0	0	0	0	0	0	0	0	0	0	0	0	0	0	0	0	0	0	0	0	0	0	0	0	0	0	0	0	0	0	0	0	0	0	0	0	0	0	0	0	0	0	0.0932692	0
AC019064.1	0	0	0	0	0	0	0	0	0	0	0	0	0	0	0	0	0	0	0	0	0	0	0	0	0	0	0	0	0	0	0	0	0	0	0	0	0	0	0	0	0	0	0	0	0	0	0	0	0
AC007391.1	0.162355	0.234604	0.0996123	0	0	0	0	0	0.129639	0	0	0	0	0.0938491	0	0.152772	0.133206	0	0.0849028	0	0	0.216963	0	0	0	0.112899	0	0.146309	0	0	0	0	0	0.127692	0	0	0	0	0.148561	0	0	0.233204	0.271455	0	0	0	0	0	0
AC006369.2	0	0	0	0	0	0	0	0	0	0	0	0	0	0	0	0	0	0	0.107684	0	0	0	0	0	0	0	0	0	0	0	0	0	0	0	0	0	0	0	0	0	0	0	0	0	0	0	0	0	0
LINC00211	0	0.0565523	0	0	0.0538441	0.0678785	0	0	0	0	0	0	0	0	0	0	0	0	0	0.113929	0	0	0	0	0	0	0.0496398	0	0	0	0	0	0	0	0	0	0.102299	0	0	0.036151	0	0	0	0.0262927	0	0	0	0	0.107398
AC009229.2	0	0	0	0	0	0	0	0	0	0	0	0	0	0	0	0	0	0	0	0	0	0	0	0	0	0	0.273856	0	0	0	0	0	0	0	0	0	0	0	0	0	0	0	0	0	0	0	0	0	0
AC009229.3	0	0	0.338172	0	0	0	0	0	0	0.662327	0	0	0	0	0	0.42715	0.38741	0	0	0	0.3096	0	0	0	0	0	0	0	0	0	0	0	0	0	0	0	0	0	0	0.348056	0	0	0	0	0	0	0	0	0
AC009229.1	0	0.0907908	0	0	0	0.136828	0	0	0	0	0	0	0	0	0	0	0	0	0	0	0	0	0	0	0	0	0	0	0	0.115687	0	0	0	0	0	0	0	0	0	0	0	0	0	0	0	0	0	0	0.121149
LINC01883	0	0	0	0	0	0	0	0	0	0	0	0	0	0	0	0	0	0	0	0	0	0	0	0	0	0	0	0	0	0	0	0	0	0	0	0	0	0	0	0	0	0	0	0	0	0	0	0	0
LINC01794	0	0	0	0	0	0	0	0	0	0	0	0	0	0	0	0	0	0	0	0	0	0	0	0	0	0	0	0	0	0	0	0	0	0	0	0	0	0	0	0	0	0	0	0	0	0	0	0	0
LINC01914	0	0.21739	0	0.135816	0	0	0.117503	0	0	0.146148	0.150203	0.12273	0.117983	0.223807	0.184421	0	0	0	0.113712	0	0	0	0	0.165383	0.157959	0.0566978	0.16439	0.0889081	0	0.0877553	0.168112	0.195362	0.161708	0	0	0	0.102299	0	0.0881516	0.117218	0.255492	0	0	0.158984	0	0	0	0.104843	0
AC016735.1	0	0.687938	2.13523	0	0.743689	0	1.39564	0.584295	0.507726	1.07056	0	0	0	0.515641	0	0.680199	0.589654	0.690903	0.462372	0.589654	0.810796	0	0	1.04934	0	0.499309	0	0	1.36846	0	0.486205	0	0	0.494781	0.528473	0	1.7488	0	1.03174	0	0	0.886004	0	0	0	0	0.532361	0	0
LINC02590	0	0	0	0	0	0	0	0	0	0	0	0	0.0847062	0	0	0	0	0.135025	0	0	0	0	0	0	0	0	0	0	0	0	0	0	0	0.0996802	0.0986464	0	0	0	0	0	0	0	0	0	0	0	0.111051	0	0
LINC02580	0.235312	0.259418	0.326158	0.584295	0.0841812	0.584295	0.108051	0.554821	0.159497	0.26839	0.316084	0	0.490544	0.558097	0.285621	0.540795	0.534245	0.0844284	0.453689	0.383198	0.241292	1.02621	0.354184	0.543364	0.42715	0.301421	0.273856	0.338794	0.635336	0.229304	0.0895155	0.218791	0.378048	0.522946	0.316084	0.229304	0.208618	0.226969	0.266011	0.582081	0.285853	0.160747	0.531704	0.664204	0.369494	0.348056	0.82587	0.139558	0
LINC01126	0.458035	0.35503	0.588292	0.400725	0.343247	0.121716	0.352631	0.241908	0.320776	0.388633	0.225954	0.805807	0.35503	0.515641	0.42848	0.290646	0.348365	0.261164	0.262596	0.433497	0.320776	0.31441	0.623634	0.413436	0.325289	0.207659	0.327374	0.244208	0.221527	0.386174	0.313554	0.284987	0.320129	0.302008	0.382237	0.248543	0.456014	0.361216	0.25397	0.36687	0.296696	0.328341	0.281781	0.538104	0.304023	0.515058	0.406178	0.56662	0.289323
LINC01833	0.188575	0.109872	0.107684	0.180173	0.0538441	0.152547	0	0.0500885	0	0.214781	0.107146	0	0.0847062	0.739595	0.136733	0.324955	0	0	0.0735347	0.113929	0.0610902	0	0	0.146026	0.0479195	0	0.0710338	0.0504427	0.352313	0.452689	0	0.175756	0.0475765	0.114837	0.222043	0	0.174764	0	0.25397	0.142766	0	0.434966	0.173244	0.0958273	0	0.289323	0.0607777	0.0584458	0.139955
AC012354.1	0.0826448	0.0639811	0.0996123	0.223807	0.117042	0.59773	0.100033	0.117308	0.119629	0.548127	0.225954	0.0929584	0.182234	0.408389	0	0.620498	0.104088	0.114988	0.133048	0.207007	0.34213	0	0.111051	0.610157	0.302542	0.112899	0.25455	0.0585187	0.400255	0.171299	0.0398842	0.274375	0.107684	0.276623	0.12744	0.19968	0.219951	0.0742301	0.326487	0.0889081	0.361991	0.116056	0.219951	0.115371	0.129713	0.202175	0.0824789	0.170445	0.169185
AC093702.1	0	0	0	0	0	0	0	0	0	0	0	0	0	0	0	0	0	0	0	0	0	0	0	0	0	0	0.25455	0	0	0.244765	0	0	0	0	0	0	0	0	0	0	0	0	0	0	0	0.243009	0	0	0
AC093833.1	0	0	0	0.180173	0	0.152547	0	0	0.119629	0	0.213199	0	0	0	0	0	0	0	0	0	0	0	0.232873	0.3096	0	0	0.133364	0	0	0	0.175923	0.175756	0	0	0	0	0.126691	0	0	0	0	0	0	0	0	0	0	0	0
LINC01820	0	0	0	0	0	0	0	0	0	0	0	0	0	0	0	0	0	0	0	0	0	0	0	0.0860821	0	0.0973112	0	0	0	0	0.0895155	0	0	0	0	0	0	0	0	0	0	0	0	0	0	0.113856	0	0	0
LINC02583	0.198802	0	0	0	0	0	0	0	0	0	0	0	0	0	0	0.101116	0	0	0	0	0	0.129456	0	0	0	0	0	0	0	0	0	0	0	0	0.0842421	0	0	0	0	0	0.134888	0	0	0	0	0.278482	0	0.114709	0.107398
LINC01119	0.112465	0.348673	0.205117	0.167542	0.0996802	0.425567	0	0.101316	0.259418	0.11133	0.266011	0.32676	0.169573	0.278786	0.258128	0.347746	0.194214	0.269069	0.355765	0.383198	0.59353	0.216963	0.43958	0.185666	0.096952	0.347049	0.25455	0.0971508	0.254765	0.49647	0.254979	0.380608	0.389041	0.114837	0.444027	0.266272	0.197072	0.121937	0.148561	0.394804	0.144911	0.222233	0.183474	0.149118	0	0.348056	0.375483	0.580789	0.312259
AC016722.1	0	0	0	0	0	0.136828	0	0	0	0.407939	0	0	0	0	0.169573	0.101116	0	0	0	0	0	0	0	0	0	0	0	0	0	0	0	0.142101	0.107684	0	0.0842421	0	0.186224	0	0	0.156112	0	0	0	0	0	0	0.0824789	0	0
AC093635.1	0.448507	0.362327	0.532361	0.463406	0.237913	0.152547	0.163449	0.241908	0.36645	0	0.290394	0.521828	0.26533	0.152237	0.214781	0.127008	0.118352	0.360406	0.268078	0.499979	0.257293	0.178386	0.531704	0.247842	0.123	0.431442	0.33538	0.244208	0.254765	0.229304	0.175923	0.416059	0	0.114837	0.279244	0.248543	0.232194	0.534245	0.701427	0.339495	0.166878	0.212783	0.329385	0.31908	0.219716	0.243009	0.210282	0.522946	0.139955
AC007402.1	0	0.0327141	0	0	0	0	0	0.0500885	0	0	0	0	0	0	0	0	0	0	0	0	0	0	0	0	0	0.031098	0	0	0	0	0	0	0	0	0	0	0	0	0	0	0.0584458	0	0	0	0	0.0337191	0	0	0
LINC01867	0	0	0	0	0	0	0	0	0	0	0	0	0	0	0	0	0	0	0	0	0	0.159604	0	0	0	0	0	0	0	0	0	0	0	0	0	0	0	0	0	0	0	0	0	0	0	0	0	0	0
AC139712.3	0	0.234604	0	0	0	0	0	0.117308	0	0	0	0	0	0	0	0	0	0	0	0	0	0	0	0	0	0	0.10493	0	0	0	0	0	0	0.0860821	0	0	0	0	0	0.0889081	0.144911	0	0	0	0	0.0976288	0	0	0
AC010967.1	0.170979	0.3894	0	1.31688	0.903833	1.10079	0	0.991272	0.259418	0.918509	0.257603	0	0.515641	0.630581	0	0.749235	1.18037	0.925756	0.198495	0.187894	0.412982	1.25231	0.515058	0.522946	1.42419	0.622802	1.84024	0.327714	1.08677	0.978991	0.894699	0	1.35647	1.58753	0.484975	1.1156	0.903833	0.670491	0.27978	0.318715	1.13491	0.268886	0	0.469207	2.12151	1.67971	0.501819	0	0.595611
AC010967.2	0	0	0	0	0	0	0	0	0	0	0	0	0	0	0	0	0	0	0	0	0	0	0	0	0	0.220945	0	0	0	0	0	0	0	0	0	0	0	0	0	0	0	0	0	0	0	0	0	0	0
AC008280.3	1.03767	0.35503	0.144781	0.424418	0.607818	0.694661	0.495317	0.767191	0.688981	0.671408	0.381474	0.378048	0.563193	0.278786	0.463881	0.673193	0.944732	0.394318	0.642346	0.499979	0.741681	0.342451	0.378048	0.322436	0.458598	0.301421	0.304254	0.819153	0.394804	0.299172	0.645668	0.59353	0.67583	0.541391	0.316084	0.639722	0.444983	0.38741	0.293891	0.50065	0.765113	0.212783	0.947964	0.913907	0.681271	0.494781	0.151652	0.246871	0.776173
AC011306.1	0.0735923	0	0.0353593	0.108305	0.0699922	0.121716	0.19477	0.101316	0.0994543	0	0.0502059	0.0929584	0.0699922	0.0938491	0.116056	0.0903218	0.0605955	0.0667603	0.133048	0.0703533	0.0721797	0.0847062	0.122371	0.064504	0.096952	0.0386052	0	0.0658188	0	0.0625547	0.0398842	0.123774	0.128965	0	0.115181	0	0.149829	0.361216	0	0.178386	0.0869166	0	0.0675734	0	0	0.0844284	0.210282	0.104843	0.069478
MIR217HG	9.99946	4.40899	3.67179	2.35747	6.50407	4.7967	6.71068	0.454111	5.95825	3.42641	5.81952	6.71068	5.30801	5.67411	3.17555	2.19268	7.53393	4.44429	1.31127	3.86866	3.97621	1.68426	2.16443	2.13523	4.14837	3.86866	4.63035	3.31792	3.10824	3.38983	6.13743	4.26934	2.37393	5.09563	4.33931	0.978991	2.28732	6.50407	4.75688	2.67559	4.20716	6.71068	5.81952	1.6983	4.7967	3.63119	4.99909	3.86866	9.3993
LINC01813	0	0	0	0	0	0	0	0	0	0	0	0	0	0	0	0	0	0	0	0	0	0	0	0	0	0	0	0	0	0	0	0	0	0	0	0	0	0	0	0	0	0	0	0	0	0	0	0	0
LINC01795	0	0	0	0	0	0	0	0	0	0	0	0	0	0	0	0	0	0	0	0	0	0	0	0	0	0	0	0	0	0	0	0	0	0	0	0	0	0	0	0	0	0	0	0	0	0	0	0	0
LINC01122	0.198802	0	0.0561975	0.135816	0	0	0	0	0	0	0	0.12273	0	0.171139	0	0	0	0.194046	0.0615802	0.0557975	0.184631	0.31441	0.0991511	0.0552087	0.0479195	0.0684425	0.0824789	0.26567	0.156336	0	0.136637	0	0.0987503	0.0860821	0	0	0	0	0	0	0.0665708	0.0763144	0.0409732	0.104715	0.153667	0	0.0824789	0	0.185432
LINC01793	0	0	0	0	0	0.0678785	0	0	0.0465857	0	0	0	0	0	0	0	0	0	0	0	0	0	0.0991511	0	0	0	0	0	0	0	0	0	0	0.0425379	0	0	0	0	0	0	0	0	0	0	0	0.0976288	0	0	0
AC007100.1	0	0	0	0	0	0	0	0	0	0	0	0	0	0	0	0	0	0	0	0	0.131225	0	0	0	0	0	0	0	0	0	0	0	0	0.139698	0	0	0	0	0	0	0	0	0	0	0	0	0	0	0
AC007179.2	0	0	0	0	0	0	0	0	0	0	0	0	0	0	0	0	0	0	0	0	0	0	0	0	0	0	0	0	0	0	0	0	0	0	0	0	0	0	0	0	0	0	0	0	0	0	0	0	0
AC007179.1	0	0	0	0	0	0	0	0	0	0	0	0	0	0	0	0	0	0	0	0	0	0	0	0	0	0	0	0	0	0	0	0	0	0	0	0	0	0	0	0	0	0	0	0	0	0	0	0	0
LINC01185	0.284526	0	0	0	0	0	0	0	0	0.201363	0	0	0	0	0	0	0	0	0	0.152547	0	0	0	0	0	0.0973112	0	0	0	0	0	0	0	0	0	0	0	0	0	0	0.0768486	0	0	0	0	0	0	0	0
AC016747.2	0.56662	0.224267	0.360777	0.390182	0.584295	0.3214	0.700411	0.390182	0.567303	0	0	0.693786	0	0.31745	0.47622	0	0.501235	0.67583	0.555986	0.418765	0.654258	0.407589	0	0.378776	0	0	0.515641	0	0	0.584295	0.769246	0.855034	0	0	0.243559	0.732323	0	0.331093	0	0	0	0.640653	0.263251	0.721106	0.401715	0	0.260932	0	0.987799
AC093159.1	0	0	0	0	0	0	0	0	0	0	0	0	0	0	0	0	0	0	0.327033	0	0.274375	0	0	0	0	0	0	0	0	0	0.145484	0	0	0	0	0	0	0	0	0	0	0	0	0	0.304023	0.381041	0	0	0
AC012368.2	0	0	0	0	0	0	0	0	0	0	0.290394	0	0.102666	0.0707	0	0	0	0	0	0.152547	0	0	0	0.0860821	0	0.0973112	0	0.123129	0	0	0	0.164238	0.128965	0	0	0	0	0	0	0	0	0	0	0	0	0	0	0.139558	0
LINC00309	0	0	0	0	0	0	0	0	0	0	0	0	0	0	0	0	0	0	0	0	0	0	0	0	0	0	0	0	0	0	0	0	0	0	0	0	0	0	0	0	0	0	0	0	0	0	0	0	0
AC114752.1	0	0	0	0	0	0	0	0	0	0	0	0	0	0	0	0	0	0	0	0	0	0	0	0	0	0	0	0	0	0	0	0	0	0	0	0	0	0	0	0	0	0	0	0	0	0	0	0	0
AC114752.2	0	0	0	0	0	0	0	0	0	0	0	0	0	0	0	0	0	0	0	0	0	0	0	0	0	0	0	0	0	0	0	0	0	0	0	0	0	0	0	0	0	0	0	0	0	0	0	0	0
LINC01805	0	0	0	0	0	0	0	0	0	0	0	0	0	0	0	0	0	0	0	0	0	0	0	0	0	0	0.118201	0	0	0	0	0	0	0	0	0	0	0	0	0	0	0.101474	0	0	0	0	0	0	0
AC008074.2	0.0826448	0.145904	0.072017	0.196086	0.222696	0.170696	0.338172	0.137369	0.0813551	0.418765	0.213199	0.154765	0.145262	0.0601399	0	0.0903218	0.0605955	0.226334	0.0415507	0.225009	0.131225	0.271455	0	0.137099	0.207205	0.0566978	0.25455	0.113642	0.303793	0.115687	0.136637	0.195362	0.117405	0.231676	0.171139	0.248543	0.161473	0.184948	0.161246	0.156112	0.166878	0.0886302	0.0675734	0.115371	0.238171	0.187343	0.111051	0.0816648	0.350042
LINC02579	0	0	0	0	0.0841812	0	0	0	0	0	0	0	0	0	0	0	0.0508082	0	0	0	0	0	0	0	0	0	0	0.0585187	0.0660083	0	0	0.105873	0	0	0	0	0	0	0	0	0	0	0	0.0262927	0	0	0	0	0
AC007365.1	0.121548	0	0.177617	0.167542	0.117042	0.264267	0	0.286559	0.179964	0	0	0	0.0847062	0.136141	0	0	0.263065	0.12437	0	0.242136	0	0	0.185529	0.0739641	0	0.164238	0	0.113642	0	0.115687	0.0790515	0.264267	0.21113	0	0	0.21417	0	0	0.102299	0.156112	0.144911	0	0.104088	0.0605955	0	0.0976288	0	0.125263	0.121149
LINC01800	0.0580408	0	0	0	0	0	0	0	0	0	0	0	0	0	0	0	0	0	0	0	0	0	0	0	0	0	0.0496398	0	0	0	0	0	0	0	0	0	0	0	0	0	0	0	0	0	0	0	0	0	0
LINC02245	0	0	0	0	0	0	0.0759626	0	0	0.0935807	0	0	0	0	0	0	0	0	0	0	0	0	0	0	0	0	0	0	0	0.0502553	0	0	0	0	0	0	0	0	0.0428617	0	0	0	0	0	0	0	0	0	0
AC007389.3	0.0664163	0	0	0	0	0	0	0.0618092	0	0	0	0	0	0	0	0	0	0.0667603	0	0	0.0498668	0	0	0	0	0	0.0496398	0	0	0	0.0328534	0	0	0	0	0	0.0508555	0	0	0	0	0	0	0.0262927	0	0	0	0	0.0570073
AC007389.5	0	0.190473	0.0996123	0	0	0	0	0	0.36645	0	0	0.12273	0.130873	0.0420811	0	0	0.0810574	0.105125	0	0	0	0.129456	0.277891	0.064504	0	0	0.0934571	0.0971508	0	0.102015	0	0	0.0987503	0.0734772	0.0723851	0.185946	0.219951	0.136733	0	0.0653709	0	0.0763144	0	0.170445	0.17057	0.15674	0.0704447	0	0
AC118345.1	0	0	0	0	0	0	0	0	0	0	0	0	0	0	0	0	0	0	0	0	0	0	0	0	0	0	0	0	0	0	0	0	0	0	0	0	0	0	0	0	0	0	0	0	0	0	0	0	0
LINC01873	0	0	0	0	0	0.0678785	0	0	0.0465857	0	0	0	0	0	0	0	0.0508082	0	0	0	0	0	0	0.0333572	0	0	0	0	0	0	0	0	0	0	0.0428617	0	0	0	0	0	0	0.0429953	0	0	0	0.0416868	0	0	0
LINC01798	0	0.209963	0	0.156897	0.222696	0.121716	0	0.302863	0.224402	0	0	0.17368	0.34402	0.0707	0.169573	0.219159	0	0	0	0.472183	0.0990901	0.198081	0	0.176089	0.188935	0	0.193661	0	0.143923	0.130446	0.100939	0.133048	0.142431	0.219437	0	0	0.174764	0	0.365575	0.23674	0	0.101474	0	0.253153	0	0.129128	0.111051	0	0.552898
LINC01797	0.235312	0	0.0996123	0	0	0.107146	0	0	0	0	0.0831862	0	0	0	0	0	0	0.169467	0.0986464	0.0976288	0	0	0.264915	0.146026	0	0	0.215476	0	0.170241	0	0.0612724	0.274375	0	0	0.161123	0	0.0817826	0.466937	0.0881516	0.0653709	0	0.0763144	0	0.104715	0	0.214781	0.138884	0	0.0941273
LINC01799	0.38976	0	0	0.289888	0.237913	0	0	0.377232	0.179964	0.425956	0.276182	0.137522	0.157816	0.613204	0.835098	0	0	0.12437	0	0.499979	0	0	0	0.378776	0.238171	0	0	0.113642	0.130757	0.201653	0.213785	0.142101	0.320129	0.550858	0.316084	0	0	0	0.213413	0.440486	0.144911	0	0	0.0605955	0.35101	1.16614	0.0953538	0.236497	0.414705
AC007403.1	0	0.109872	0.144781	0.320776	0	0.300474	0.271674	0.677717	0.437567	0	0.290394	0	0.0847062	0.341396	0.353712	0.324955	0.118352	0.261164	0	0.565936	0.0990901	0	0	0.237516	0.238171	0.0973112	0.118201	0	0	0.521223	0.404347	0	0.233656	0.449354	0.0986464	0	0	0	0.116386	0.598522	0	0.451024	0.127008	0.450418	0	0.581424	0.292575	0	0.648297
LINC01828	0.489912	0.759484	0.541391	0.952659	0.410044	0.300474	0.299933	0.607818	0.347435	0.637927	0.511668	0.449354	0.406708	1.2368	0.86603	0.256083	0.647428	0.340356	0.42801	0.363123	0.403525	0.784316	0.416547	0.678689	0.238171	0.691781	0.691781	0.301421	0.649158	0.213785	1.52044	0.380608	0.53302	0.366012	0.658634	0.419196	0.293891	0.398407	0.701427	0.702405	0.3096	0.369929	0.34213	0.538104	0.713166	1.33083	0.462889	0.272207	0.552898
AC023115.1	0	0.0996123	0	0	0	0	0	0	0	0	0	0	0	0	0	0	0	0	0	0	0	0	0	0	0	0	0	0	0	0	0.0895155	0	0	0	0	0	0	0	0	0	0	0	0	0.072017	0	0	0	0	0
AC007422.1	0	0.0565523	0	0	0	0.0937905	0	0	0	0	0	0	0	0.0300284	0	0.0699367	0	0	0	0	0	0	0	0.046865	0.0721797	0.164238	0	0.0743268	0	0	0	0.0980296	0	0	0	0	0	0	0	0.0544015	0	0	0	0	0	0	0	0	0
AC007422.2	0	0	0	0	0	0	0	0	0	0	0	0	0	0	0	0	0	0	0	0	0	0	0	0	0	0	0	0	0	0	0	0	0	0	0	0	0	0	0	0	0	0	0	0	0	0	0	0	0
LINC01812	0.179662	0.663265	0.144781	0.146309	0.0996802	0.3214	0.126915	0.519388	0.0813551	0.157055	0.791551	0.32676	0.369156	0.285304	0.371497	0.178099	0	0.330099	0	1.06851	0.30107	0.129456	0.290394	0.226969	0.096952	0.0684425	0.181119	0.244208	0.105873	0.102015	0.185142	0.679444	0	0.387001	0.0723851	0	0.219951	0.136733	0.161246	0.190961	0.3096	0	0.363498	0	0	0.171898	0.0704447	1.45356	0.495317
LINC01890	0	0	0	0	0	0	0	0	0	0	0	0	0	0	0	0	0	0	0	0	0	0	0	0	0	0	0	0	0	0	0	0	0	0	0	0	0	0	0	0	0	0	0	0	0	0	0	0	0
AC092431.1	0	0	0	0	0	0	0	0	0	0	0	0	0	0.240385	0	0	0	0	0	0	0	0	0	0	0	0	0	0	0	0	0	0	0	0.167542	0	0	0	0	0	0	0	0	0	0	0	0	0	0	0
AC016700.3	0	0	0	0	0	0	0	0	0	0	0	0	0	0	0	0	0	0	0	0	0	0	0	0	0	0	0	0	0	0	0	0	0	0	0	0	0	0	0	0	0	0	0	0	0	0	0	0	0
AC007881.3	0.561816	0.315768	0.287311	0	0.783213	0.280533	0.144781	0.302863	0.320776	0	0.188761	0.154765	0.240208	0.136141	0.19968	0.114224	0.348365	0.226334	0.516225	0.242136	0	0.159604	0.198802	0.349747	0.108513	0.0813551	0.215476	0.3096	0	0.201653	0.160551	0	0.397183	0.0996802	0.171139	0	0.657701	0	0.27978	0.23674	0.378776	0.495852	0.114581	0	0	0.0976288	0.184029	0	0.121149
AC007878.1	0.170979	0.52913	0.240208	0.411052	0.237913	0.570119	0.271674	0.677717	0.243376	0.201363	0.605412	0.137522	0.847201	0.233204	0.776173	0.335852	0.306655	0.444983	0.159712	0.792692	0.498243	0.289011	0.470803	0.552898	0.401715	0.622802	0.33538	0.218791	0.44678	0.312462	0.284987	0.264267	0.724226	0.505417	0.732323	0.3894	0.706461	0.509057	0.555986	0.465841	0.41159	0.674915	0.363498	0.408389	0.498776	0.674915	0.758208	1.24451	0.478752
AC092653.1	0.151365	0.300474	0.160052	0	0	0.338794	0.417036	0.257865	0.119629	0	0.122224	0.17368	0.102666	0.301421	0	0.13929	0.327714	0.276623	0.284987	0.418765	0.0990901	0.49647	0.400725	0.0983859	0.272207	0.0973112	0.458035	0	0.277605	0.145026	0	0.186749	0.256793	0	0.115181	0.266272	0.611655	0	0	0.201814	0	0.116056	0	0.408389	0	0.397986	0.398407	0	0.155681
AC073046.1	0	0.20052	0	0.546044	0	0.70552	0.271674	0.403056	0.189109	0	0	0.27046	0.835098	0.152237	0	0.583516	0.205824	0	0.370365	0.602581	0.3096	0.768143	0.36645	0.413436	0	0.32676	0.588984	0.227163	0.254765	0.213785	0.562504	0.30865	0.414213	0.181745	0.832366	0.419196	0.381041	0.509057	0.19989	0.792692	0	0.340809	0	0.76624	0	0.214781	0.184029	0.56662	0.62124
AC073263.2	0	0.0565523	0	0	0	0	0	0	0.0465857	0	0.0608666	0.0794373	0	0	0	0	0	0	0	0	0	0	0	0	0	0	0	0	0	0	0	0	0	0.0425379	0	0	0	0.087163	0	0.0544015	0	0.0429953	0	0	0.102924	0	0	0	0.0570073
AC019069.1	0.363874	0.234604	0.072017	0.135816	0.173082	0.107146	0	0.0874334	0.056587	0.146148	0.472661	0	0.130873	0.16296	0.19968	0.20321	0.0810574	0.250508	0.0456669	0.0703533	0.0721797	0.289011	0.264915	0.165383	0.48928	0.195162	0.228841	0.498243	0.570994	0.130446	0.213785	0.407238	0.128965	0.690024	0.182921	0	0.30865	0.242826	0.25397	0.128965	0.20901	0.340809	0.21113	0.431987	0.153667	0	0.111051	0.625413	0.679444
LINC01291	0	0.396802	0	0	0.629741	0.49647	0	0.454111	0.347435	0.26839	0.331093	0	0	0	0	0	0.612429	0.349747	0.268078	0.472183	0	0	0.344317	0.315768	0.458598	0.465257	0	0.327714	0.606176	0.777363	0.338794	0	0	0.0349649	0.528473	0	0	0	0.310471	0	0.482224	0.31745	0.34213	0.552898	0.594882	0.645668	0.484975	0	0
AC104135.1	0	0.182921	0	0	0.584295	0	0	0	0.243376	0	0.20052	0	0	0	0	0	0.143923	0.105125	0	0.0976288	0	0	0	0.0552087	0	0.0566978	0	0	0.105873	0.102015	0.0612724	0	0	0	0.0723851	0	0	0	0	0	0	0.19989	0	0.0504427	0	0.227357	0.138884	0	0
LINC01293	0	0	0	0	0.173082	0.08151	0	0.101316	0.056587	0	0	0	0	0.0300284	0.116056	0	0.118352	0	0	0.0703533	0	0	0.214396	0.0401039	0	0.0684425	0	0.0971508	0	0	0	0	0	0	0.115181	0	0	0	0.132626	0	0	0.0523496	0.0849787	0	0	0.052235	0	0	0
AC005034.4	0.151365	0.15674	0.196926	0.280006	0.190473	0.3214	0.285853	0.241908	0.688981	0.538917	0.107146	0	0.31835	0.186602	0	0.437043	0.0698812	0.42715	0	0.152547	0.146946	0.178386	0.214396	0.216963	0.351901	0.32676	0.382237	0.0821694	0.45916	0.188388	0.507215	0.229831	0.618843	0.645668	0.243559	0.35503	0.647428	0.184948	0.0752674	0.377232	0.656768	0.394804	0.23072	0.602581	0.385756	0.312666	0.549466	0	0.201814
AC084149.1	0	0	0	0	0	0	0	0	0	0	0	0	0	0	0	0	0	0	0	0	0	0	0	0	0	0	0	0	0	0	0	0	0	0	0	0	0	0	0	0	0	0	0	0	0	0	0	0	0
AC084149.2	0	0	0	0	0	0	0	0	0	0.227727	0	0	0	0	0	0	0	0	0	0	0.0721797	0.117308	0	0	0	0	0	0	0	0	0	0	0	0	0	0	0.138884	0	0	0	0	0	0	0	0	0	0.0704447	0	0
LINC01851	0	0	0	0	0	0	0	0	0	0	0	0	0	0	0	0	0	0	0	0	0	0	0	0	0	0	0	0	0	0	0	0	0	0	0	0	0	0	0	0	0	0	0	0	0	0	0	0	0
AC092660.1	0	0	0	0	0	0	0	0	0	0	0	0	0	0	0	0	0	0	0	0	0	0	0	0	0	0	0	0	0	0	0	0	0	0	0	0	0	0	0	0	0	0	0	0	0	0	0	0	0
AC012355.1	0	0	0	0	0	0	0	0	0	0	0	0	0	0	0	0	0	0	0.113712	0	0	0	0	0	0	0	0	0	0	0	0	0	0	0	0	0	0	0	0	0	0	0	0	0	0	0	0	0	0
LINC01815	0	0	0	0	0	0	0	0	0	0	0	0	0	0	0	0	0	0	0	0	0	0	0	0	0	0	0	0	0	0	0	0	0	0	0	0	0	0	0	0	0	0	0	0	0	0	0	0	0
AC079896.1	0	0	0	0	0	0	0	0	0	0	0	0	0	0	0	0	0	0	0	0	0	0	0	0	0	0	0	0	0	0	0	0	0	0	0	0	0	0	0	0	0	0	0	0	0	0	0	0	0
AC010105.1	0	0	0	0	0	0	0	0	0	0	0	0	0	0	0	0	0	0	0	0	0	0	0	0	0	0	0	0	0	0	0	0	0	0	0	0	0	0	0	0	0	0	0	0	0	0	0	0	0
LINC01809	0	0	0	0	0	0	0	0	0	0	0	0	0	0	0	0	0	0	0	0	0	0	0	0	0	0	0	0	0	0	0	0	0	0	0	0	0	0	0	0	0	0	0	0	0	0	0	0	0
AC106874.1	0	0	0	0	0	0	0	0	0	0	0	0	0	0	0	0	0	0	0	0	0	0	0	0	0	0	0	0	0	0	0	0	0	0	0	0	0	0	0	0	0	0	0	0	0	0	0	0	0
LINC01964	0	0	0	0	0	0.0563907	0	0	0	0	0	0	0	0	0	0	0	0	0	0	0	0	0	0	0	0	0	0	0	0.0502553	0	0.0602366	0	0	0	0	0	0	0	0	0	0	0	0	0	0	0	0	0
ST3GAL5-AS1	0.170979	0.0730557	0.205117	0	0	0.107146	0	0.0874334	0.138539	0.146148	0.0711879	0.285853	0.169573	0.186602	0.147045	0.0903218	0.0810574	0.237715	0.159712	0.326487	0.219437	0.117308	0	0.0552087	0.096952	0.125759	0.228841	0	0.095252	0.0877553	0	0	0.161708	0.127692	0.342451	0.280533	0.138884	0	0.148561	0.167397	0.115602	0.0763144	0.0849787	0.0504427	0	0.457529	0.138884	0	0
AC012511.1	0.188575	0.275007	0.116846	0.252688	0	0.718049	0.379128	0.584295	0.148781	0	0.164238	0	0	0.115138	0	0.315215	0.295672	0.194046	0	0.187894	0.146946	0	0	0.333465	0.188935	0.140425	0.181119	0	0.365125	0.171299	0	0.243376	0	0.276623	0	0.765113	0.30865	0	0.579348	0.142766	0	0.268886	0.329385	0.228841	0.285304	0.171898	0.151652	0	0.185432
LINC01955	0	0	0	0	0	0	0	0	0	0	0	0	0	0	0.116056	0	0	0	0	0	0	0	0.198802	0	0	0	0.0607777	0	0	0	0	0	0	0	0	0	0	0	0	0	0	0	0	0	0	0	0	0	0
LINC01943	0	0.275007	0.368002	0.390182	0.237913	0.152547	0.163449	0.286559	0.446302	0.127555	0.644778	0.232406	0.102666	0.152237	0.394804	0.0799794	0.218662	0.349747	0.35101	0.446302	0.0990901	0.407589	0.36645	0.208386	0.605412	0.589654	0.741681	0.52702	0.600012	0.521223	0.322057	0.30865	0.245938	0.254765	0.279244	0.158164	0.264267	0.305519	0.767191	0.491085	0.154641	0.212783	0.573777	0.286084	0	0.243009	0	0.613204	0.365125
CYTOR	3.92243	3.35397	4.89461	2.0501	2.46642	2.7678	1.92485	2.46642	3.01452	2.20801	4.89461	4.33931	2.19268	5.2553	3.63119	1.71646	2.29573	2.15717	3.50605	2.81909	3.3719	2.91404	4.47958	2.65363	3.67179	8.80129	4.03586	4.89461	4.26934	4.12029	3.1409	3.42641	2.73521	3.67179	3.76285	1.75349	2.16443	4.51565	3.76285	3.17555	3.31792	2.46642	4.33931	4.09222	2.13523	3.31792	2.04377	4.40899	4.71706
AC233263.6	0.102862	0.0996123	0.0643588	0.117784	0.0996802	0.08151	0.117503	0.117308	0.0465857	0.290394	0.20052	0.0794373	0.0558893	0.126691	0.125818	0.101116	0.143923	0.114988	0	0.0840091	0.198288	0.271455	0.0991511	0.192223	0.108513	0.0973112	0.133364	0.0889081	0.0771978	0.0502553	0.223522	0.114581	0.117405	0.195362	0.0723851	0.145141	0.138884	0.087163	0.0881516	0.036151	0.220691	0.0763144	0.0849787	0.140733	0.153667	0.0976288	0.237516	0.104843	0.0941273
AC233266.2	0	0.471705	0	0.196086	0.3581	0	0.17487	0.650741	0	0.778503	0	0	0.102666	0.0826448	0.394804	0.13929	0	0.147819	0	0	0.198288	0.198081	0	0.78211	1.02446	0	0	0.374185	0	0.145026	0.192639	0.330421	1.28112	0	0.709163	0.266272	0	0	0.243376	0.201814	0.182749	0.222233	0.888913	0.182563	1.42419	0.413824	0.126244	0.139558	0
AC009237.15	0.744918	0.234604	0.245663	0.378048	0.2825	0.750273	0.787916	0.519388	0.650741	0	0.247842	0.600012	0.670491	0.541391	0.42848	0.607818	0.25397	0.639722	0.128965	0.664204	0.374976	0	0.43958	0.19968	0.526528	0.314154	0.148781	0.401715	0.423399	0.509057	0.840349	0.631421	0.153295	0.522946	0.417036	0	0.138884	0.727251	0.50065	0.459662	0.627902	0.340809	0.518051	0.687021	0.252022	0.444505	0.431442	0.506705	0.429875
AC008268.1	0	0	0	0	0	0	0	0	0	0	0	0	0	0	0	0	0	0.0756927	0.0456669	0	0	0	0	0.0401039	0	0	0	0	0	0	0	0	0	0	0	0	0	0	0	0	0	0	0	0	0	0	0	0.0816648	0
LINC00342	3.71703	4.89461	5.95825	3.42641	4.20716	3.71703	3.86866	3.92243	5.30801	3.81408	4.63035	3.86866	4.40899	6.30796	4.63035	3.54582	4.71706	4.89461	6.13743	3.76285	4.55173	4.33931	3.81408	4.71706	4.03586	5.20259	3.92243	7.90326	3.27929	3.97621	4.99909	3.92243	4.47958	4.20716	3.3719	5.09563	3.97621	2.67559	4.26934	4.14837	3.71703	4.33931	4.20716	4.47958	4.71706	4.20716	4.09222	4.09222	3.71703
AC012307.1	0	0	0	0	0	0	0	0	0	0	0	0	0	0	0	0	0	0	0	0	0	0	0	0	0	0	0	0	0	0	0	0	0	0	0	0	0	0	0	0	0	0	0	0	0	0	0	0	0
CNNM3-DT	0.217589	0.723248	0.52414	0.903833	0.962161	0.264267	1.0646	0.767191	1.05728	0.906632	1.02621	1.00293	0.416547	0.356398	0.762833	1.0646	0.744918	0.707402	0.549466	0.225009	0.682343	0.867408	0.800055	0.837692	0.851043	0.659484	0.526036	0.536664	1.41785	1.20854	0.153546	0.847201	0.515058	0.913907	1.40534	0.654973	1.14797	0	0.649158	0.980715	1.26016	0.172695	1.21599	0.887458	0.320776	1.57967	0.802476	0	1.11768
AC159540.2	3.86866	3.1409	4.40899	0.299172	3.42641	2.57806	4.71706	0	4.55173	2.83288	3.01452	3.71703	3.42641	4.40899	2.63113	2.21635	6.71068	3.63119	7.90326	2.48698	4.84565	3.42641	4.63035	3.92243	0.669574	4.33931	3.01452	3.42641	3.1409	3.10824	3.76285	4.59104	3.35397	2.7468	4.89461	4.63035	3.07546	3.71703	4.17776	2.52555	3.81408	5.95825	2.7678	6.30796	5.42362	3.35397	2.94169	2.7573	3.81408
AC159540.1	0	0	0	0	0	0	0	0	0	0	0	0	0	0	0	0	0	0	0	0	0	0	0	0	0	0	0	0	0	0	0	0	0	0	0	0	0	0	0	0	0	0	0	0	0	0	0	0	0
AC092683.1	6.71068	4.7967	7.90326	5.95825	5.81952	4.63035	4.47958	5.81952	6.71068	3.92243	4.71706	5.95825	6.71068	6.9588	5.30801	4.89461	5.54793	6.13743	5.30801	4.99909	3.1409	6.04784	4.09222	7.53393	6.71068	9.99946	5.20259	11.693	4.7967	5.09563	7.21236	5.09563	5.54793	5.54793	4.63035	4.7967	5.30801	3.67179	6.9588	4.71706	5.67411	4.71706	4.63035	7.90326	4.47958	6.9588	5.67411	5.09563	5.30801
AC092683.2	0.440026	0.20052	0.556658	0.167542	0.569388	0.410044	0	0.20092	0.179964	0	0.137099	0.27046	0.734412	0.240385	0.184421	0.114224	0.104088	0.12437	0.544729	0.743689	0.59353	0.430896	0.482224	0.690024	0.798692	1.24451	0.10493	0.801418	0.117784	0.229304	0.168112	0.438092	0.199298	0.181745	0.405839	0.815635	0.232194	0.481778	0.429413	0.292836	0.86603	0.527747	0	1.13691	0.252022	0.893261	0.567303	0	0.312259
LINC01104	0	0	0	0	0	0	0	0	0	0	0	0	0	0	0	0	0	0	0	0	0	0	0	0	0	0	0	0	0	0	0	0	0	0	0	0	0	0	0	0	0	0	0	0	0	0	0	0	0
LINC01868	0	0	0	0	0	0	0	0	0	0	0	0	0	0	0	0	0	0	0	0	0	0	0	0	0	0	0	0	0	0	0	0	0	0	0	0	0	0	0	0	0	0	0	0	0	0	0	0	0
AC092168.1	0	0	0	0	0	0	0	0	0	0	0	0	0	0	0	0	0	0	0	0	0	0	0	0	0	0	0	0	0	0	0	0	0	0	0	0	0	0	0	0	0	0	0	0	0	0	0	0	0
TBC1D8-AS1	0.170979	0.259418	0.297649	0.126056	0.190473	0.152547	0.299933	0.214589	0.320776	0.214781	0.107146	0.0794373	0.203494	0.240385	0.229831	0.178099	0.0925858	0.194046	0.186089	0.259131	0.209578	0.3581	0.122371	0.290646	0.224402	0.154124	0.215476	0.236106	0.328028	0.258353	0.160551	0.152237	0.30865	0.276623	0.254979	0.19968	0.328666	0.242826	0.213413	0.224267	0.266272	0.360777	0.183474	0.182563	0.267469	0.365575	0.138884	0.170445	0.312259
LINC01870	0	0	0	0	0	0	0	0	0	0	0	0	0	0	0	0	0	0	0	0	0	0	0	0	0	0	0	0	0	0	0	0	0	0	0	0	0	0	0	0	0	0	0	0	0	0	0	0	0
LINC01127	0	0.0327141	0.107684	0	0.0538441	0.08151	0	0.0500885	0.109161	0	0.164238	0.0794373	0.227163	0.0707	0	0.114224	0.104088	0.135025	0.35101	0.0557975	0.131225	0	0.214396	0.0333572	0.123	0.031098	0.491626	0.0442621	0.117784	0.130446	0.028215	0.0602366	0	0.254765	0	0	0.0621069	0	0	0.036151	0	0.0429953	0.049917	0.149118	0	0.0844284	0.0953538	0.201099	0.0941273
LINC01796	0	0	0	0	0	0	0	0	0	0	0	0	0	0	0	0	0	0	0	0	0	0	0	0	0	0	0	0	0	0	0	0	0	0	0	0	0	0	0	0	0	0	0	0	0	0	0	0	0
LINC01935	0	0	0	0	0	0	0	0	0	0	0	0	0	0	0	0	0	0	0	0	0	0	0	0	0	0	0	0	0	0	0	0	0	0	0	0	0	0	0	0	0	0	0	0	0	0	0	0	0
AC108051.1	0	0	0	0	0	0	0	0	0	0	0	0	0	0	0	0	0	0	0	0	0	0	0	0	0	0	0	0	0	0	0	0	0	0	0	0	0	0	0	0	0	0	0	0	0	0	0	0	0
AC073987.1	0	0	0	0	0.117042	0	0	0	0	0	0	0	0	0	0	0	0	0	0	0	0	0	0	0	0	0	0	0	0	0.115687	0	0	0	0	0	0	0	0	0	0	0	0	0	0	0	0	0	0	0
AC013727.1	0	0	0	0	0	0	0	0	0	0	0	0	0	0	0	0	0	0	0	0	0	0	0	0	0	0	0	0	0	0	0	0	0	0	0	0	0	0	0	0	0	0	0	0	0	0	0	0	0
AC013727.2	0	0	0	0	0	0	0	0	0	0	0	0	0	0	0	0	0	0	0	0	0	0	0	0	0	0	0	0	0	0	0	0	0	0	0	0	0	0	0	0	0	0	0	0	0	0	0	0	0
AC096554.1	0	0	0	0	0	0	0	0	0	0	0	0	0	0	0	0	0	0	0	0	0	0	0	0	0	0	0	0	0	0	0	0	0	0	0	0	0	0	0	0	0	0	0	0	0	0	0	0	0
AC068535.1	0	0	0	0	0	0	0	0	0	0	0	0	0	0	0	0	0	0	0	0	0	0	0	0	0	0	0	0	0	0	0	0	0	0	0	0	0	0	0	0	0	0	0	0	0	0	0	0	0
LINC01831	0	0	0	0	0	0	0	0	0	0	0	0	0	0	0	0	0	0	0	0	0	0	0	0	0	0	0	0	0	0	0	0	0	0	0	0	0	0	0	0	0	0	0	0	0	0	0	0	0
LINC01102	0	0	0	0	0	0	0	0	0	0	0	0	0	0	0	0	0	0.0570073	0	0	0	0	0	0	0	0	0.0496398	0	0	0	0	0.0675734	0	0	0.0428617	0	0	0	0	0	0	0	0	0	0	0	0	0	0
LINC01103	0	0	0	0	0	0	0	0	0	0	0	0	0	0	0	0	0	0	0	0	0	0	0	0	0	0	0	0	0	0	0	0	0	0	0	0	0	0	0	0	0	0	0	0	0	0	0	0	0
AC013402.2	0	0	0	0	0	0	0	0	0	0	0	0	0	0	0	0	0	0	0	0	0	0	0	0	0	0	0	0	0	0	0	0	0	0	0	0	0	0	0	0	0	0	0	0	0	0	0	0	0
AC013402.3	0	0	0	0	0	0	0	0	0	0	0	0	0	0	0	0	0	0	0	0	0	0	0	0	0	0	0	0	0	0	0	0	0	0	0	0	0	0	0	0	0	0	0	0	0	0	0	0	0
AC013402.1	0	0	0	0	0	0	0	0	0	0	0	0	0	0	0	0	0	0	0	0	0	0	0	0	0	0	0	0	0	0	0	0	0	0	0	0	0	0	0	0	0	0	0	0	0	0	0	0	0
AC068057.1	0	0	0	0	0	0	0	0	0	0	0	0	0	0	0	0	0	0	0	0	0	0	0	0	0	0	0	0	0	0	0	0	0	0	0	0	0	0	0	0	0	0	0	0	0	0	0	0	0
LINC01114	0.170979	0	0.0996123	0	0	0	0	0	0	0	0	0	0.0299527	0	0	0	0	0	0.0615802	0	0	0	0	0	0	0	0	0	0	0	0	0	0	0	0	0	0	0	0	0	0	0	0	0	0	0	0	0	0
LINC01918	0	0.175923	0.166369	0	0.156224	0.264267	0	0	0	0	0	0	0.0558893	0.0420811	0	0.0903218	0	0	0	0	0.115815	0	0	0.0552087	0	0	0	0.210736	0	0	0	0	0	0	0	0	0	0	0	0	0	0	0	0.0958273	0	0	0	0	0
AC012360.2	1.22391	0.20052	0.486205	0.546044	0.410044	0	0.650019	0	0.331393	1.01712	0.538917	0.462889	0.169573	0.508391	0.353712	0	0	0.250508	0.107684	0.773835	0.631421	0.768143	0	0.290646	0	0.32676	0.897857	0.227163	0.649158	0.399005	0.562504	0	0	0.181745	0	0	0.381041	0.292212	0.555986	0.440486	0.3096	0.184631	0.430896	0.286084	0.35101	0.634585	0.359215	0.225495	0.244208
AC012360.1	0.284526	0	0.116846	0	0.190473	0	0	0	0	0	0	0	0	0	0	0	0	0.114988	0.186089	0	0	0.1433	0	0.064504	0.108513	0.0684425	0	0	0.117784	0.102015	0	0.133048	0	0	0.0842421	0	0	0	0	0.0763144	0	0.160747	0.183474	0	0	0	0.161246	0	0
AC108868.1	0	0	0.0809582	0	0	0	0	0	0	0	0	0	0	0	0	0	0	0	0	0	0	0	0	0	0	0	0	0	0	0	0	0	0	0	0	0	0	0	0	0	0	0	0	0	0	0	0	0	0
LINC01789	0	0	0	0	0	0	0	0	0	0	0	0.10704	0	0.0352676	0	0	0	0	0	0	0	0	0	0	0	0	0	0	0	0	0	0	0	0	0	0	0	0	0	0	0	0	0	0	0	0	0	0	0
AC096669.1	0	0	0	0	0	0	0	0	0	0	0	0	0	0	0	0	0	0	0	0	0	0	0	0	0	0	0	0	0	0	0	0	0	0	0.33273	0	0	0	0	0	0	0	0	0	0	0	0	0	0
LINC01885	0	0	0	0	0	0	0	0	0	0.179222	0.188761	0	0.0847062	0.0601399	0.184421	0	0	0	0	0	0	0.159604	0	0.0739641	0	0.0813551	0	0	0	0.115687	0	0	0	0.181745	0	0.229304	0	0	0	0	0.378776	0	0	0.140733	0	0	0.271455	0	0.121149
LINC01886	0.131225	0.0395809	0.144781	0.099212	0.310169	0.107146	0	0.0618092	0	0.201363	0.225954	0.154765	0.182234	0.285304	0.19968	0.13929	0	0.0667603	0.0553528	0.0703533	0.241292	0.159604	0	0.299933	0.339495	0.207659	0.16439	0.0821694	0.241908	0.0625547	0.0398842	0.294478	0.233656	0.0996802	0	0	0.469207	0.167156	0	0.0889081	0.166878	0.19989	0.495852	0.149118	0.117308	0.328341	0.197508	0.0695902	0.334254
GACAT1	0	0	0	0	0	0	0	0	0	0	0	0	0	0	0	0	0	0	0	0	0	0	0	0	0	0	0	0	0	0	0	0	0	0	0	0	0	0	0	0	0	0	0	0	0	0	0	0	0
RGPD4-AS1	0	0	0	0	0	0	0	0	0	0	0	0	0	0	0	0	0	0	0	0	0	0.198081	0	0	0	0	0	0	0	0.115687	0	0	0	0	0	0	0	0	0	0	0	0	0	0	0	0.328341	0	0	0
SH3RF3-AS1	0.198802	0.190473	0.231486	0.126056	0.137099	0.136828	0.135988	0.0874334	0.0465857	0	0.164238	0.0794373	0.0558893	0.171139	0.258128	0.277149	0.143923	0.114988	0.228138	0.0976288	0.0990901	0.1433	0.264915	0.0983859	0.123	0.154124	0	0.105298	0.254765	0.0877553	0.185142	0.164238	0.0565176	0.289011	0.196669	0.158164	0.219951	0.212558	0.102299	0.0763144	0.23264	0.0639811	0.183474	0.182563	0	0.348056	0.0824789	0.139558	0.169185
LINC01123	5.20259	4.33931	5.20259	4.63035	4.33931	4.14837	5.20259	4.40899	3.76285	3.73994	5.09563	3.92243	4.26934	6.71068	4.17776	3.60863	4.33931	3.81408	3.42641	4.09222	3.89555	3.38983	5.30801	4.09222	4.99909	5.30801	4.89461	6.9588	3.2096	3.04427	3.97621	8.32585	3.10824	4.40899	4.40899	3.35397	2.37393	6.30796	3.35397	3.86866	4.33931	3.86866	7.37314	3.10824	3.50605	2.42791	3.81408	4.99909	3.46468
LINC01106	6.13743	4.99909	5.42362	5.67411	3.38983	3.86866	7.21236	5.95825	4.71706	3.27929	7.90326	5.54793	3.38983	8.80129	6.13743	5.09563	3.76285	6.9588	6.9588	7.21236	4.26934	5.67411	5.67411	5.81952	3.35397	2.79329	4.09222	9.99946	4.03586	4.47958	4.55173	5.67411	3.86866	4.33931	3.1409	4.33931	4.89461	4.89461	4.55173	4.99909	6.50407	4.7967	7.90326	5.30801	4.55173	3.86866	4.55173	5.81952	4.99909
AC114776.1	0	0	0	0	0	0	0	0	0	0	0	0	0	0	0	0	0	0	0	0	0	0	0	0	0	0	0	0	0	0	0	0	0	0	0	0	0	0	0	0.036151	0	0	0	0	0	0	0	0	0
AC108463.2	0	0	0.137369	0	0	0	0	0.20092	0	0	0	0.433497	0	0	0	0.219159	0	0	0.164842	0.225009	0	0.289011	0	0	0	0	0	0.210736	0	0	0	0	0	0	0.316084	0	0.197072	0	0	0	0	0	0	0.132491	0	0	0	0.213944	0.218791
AC108463.3	0.121548	0.0639811	0.125699	0.135816	0.0841812	0.107146	0.108051	0.186089	0.148781	0.103103	0.150203	0.232406	0.0558893	0.233204	0.229831	0	0.218662	0.0942899	0.0849028	0.0976288	0.146946	0.0847062	0.290394	0.0739641	0.0601399	0.207659	0.133364	0.210736	0.156336	0.0625547	0.112134	0.3214	0.0669142	0.0615802	0.115181	0.133206	0.0508555	0.184948	0.0541223	0.178386	0	0.0886302	0.140425	0.0308068	0.153667	0.0416868	0.0437526	0.272207	0.185432
AC068491.3	0	0	0	0	0	0	0	0	0	0	0.0947576	0	0	0.0601399	0.19968	0	0.270989	0	0	0	0.172695	0.159604	0	0.0739641	0	0.0813551	0	0	0.130757	0	0	0	0	0	0	0	0	0	0	0.0889081	0	0.0886302	0	0	0	0	0	0	0.121149
AC017002.3	0	0.129238	0.235958	0.289888	0	0	0.19477	0.170837	0	0	0.530416	0	0.0558893	0.142766	0.42848	0	0	0	0.154389	0.113929	0	0.233204	0.166696	0.0552087	0.238171	0.288384	0.415196	0.0889081	0	0.156538	0.175923	0	0	0.139698	0	0	0	0	0	0	0.20901	0.19989	0.104088	0	0.153667	0	0	0	0.0941273
AC017002.1	0.209373	0.0639811	0	0	0	0	0.108051	0	0	0	0.164238	0.10704	0.102666	0.0707	0.136733	0	0.118352	0.0942899	0	0.293349	0	0	0.232873	0	0.172296	0.154124	0.133364	0.0971508	0.095252	0	0.0612724	0.175756	0.142431	0	0	0	0	0.110616	0.0752674	0.190961	0.105362	0	0.24003	0.0425379	0	0.0632845	0	0.139558	0.139955
AC017002.2	0.102862	0	0	0	0	0	0	0	0	0	0	0	0.0558893	0.215268	0.116056	0	0	0	0	0	0.172695	0	0.198802	0.0552087	0	0	0.0607777	0	0	0	0.0612724	0	0	0	0	0	0.0817826	0	0	0	0	0	0.0849787	0	0	0.0738419	0	0	0
AC012442.1	0.151365	0.119887	0.0907908	0.353331	0	0.338794	0.311183	0.468049	0.119629	0.388633	0.316084	0.17368	0.457529	0.310169	0	0.456519	0	0.147819	0.124799	0.418765	0.198288	0.49647	0	0.487285	0	0.374976	0.65587	0.135283	0	0.244765	0.273605	0	0.142431	0.494781	0.210282	0	0.126691	0.452689	0.132626	0.590325	0.328341	0.31745	0.140425	0.0844284	0.238171	0.261859	0.111051	0.552898	0.155681
AC016745.2	0.0580408	0.0395809	0.0416362	0.0798836	0	0	0	0	0.0465857	0.0850772	0.0502059	0	0.0558893	0.0227751	0	0.0456669	0.0413799	0	0	0	0.0498668	0	0	0	0	0.031098	0.0406721	0	0	0	0.0455534	0.0602366	0.0565176	0.0615802	0	0	0	0	0.0428617	0	0.0584458	0	0	0.0230708	0	0	0.0437526	0.0816648	0.0461531
LINC01961	0	0	0	0	0	0.121716	0	0	0	0	0	0	0	0	0	0	0	0	0	0	0	0	0	0	0	0	0	0	0	0	0	0	0	0	0	0	0	0	0	0	0	0	0	0	0	0	0	0	0
PGM5P4-AS1	0.744918	0.944732	0.387001	0.614125	0.458035	0	0.135988	0.783213	0.551606	0.847201	0.237061	0.931975	1.09294	0.348056	0.47622	0.266918	0.270989	0.588984	0.203494	0.928783	0.60694	0.725204	1.00992	0.859242	1.25231	0.679444	0.691781	0.643107	0.514588	1.13291	0.472183	0.512306	0.92287	0.515058	0.0723851	0.3894	1.52721	1.3087	0.876083	0.905233	0.473073	0.622021	0.518051	0.571869	1.06274	1.02621	1.18706	0.425177	0.534811
FAM138B	0.255892	0.224267	0.381041	0.108305	0.26839	0	0.285853	0.273354	0.206154	0	0.0608666	0	0	0.178919	0.273605	0.0699367	0.0810574	0.226334	0	0.113929	0	0.0946503	0	0.42801	0	0.0684425	0.133364	0.0658188	0.143923	0	0.185142	0.30865	0	0	0.138051	0.145141	0.161473	0.0996123	0.52482	0.21128	0	0.233204	0	0.0958273	0.335028	0.1433	0.223522	0.506705	0.069478
AC017074.2	0	0	0	0	0	0	0	0	0	0	0	0	0	0	0	0	0	0	0	0	0	0	0	0	0	0	0	0	0	0	0	0	0	0	0	0	0	0	0	0	0	0	0	0	0	0	0	0	0
AC017074.1	0.246362	0.730309	0.52414	0.180173	0.527747	0.152547	0.163449	0.241908	0.278786	0.368002	0.549466	0.154765	0.425956	0.152237	0.214781	0	0.38741	0	0.590325	0.756933	0.331093	0.342451	0.378048	0.315768	0.123	0.185432	0	0.980715	0.635336	0.130446	0.0895155	0.639722	0.245938	0.208386	0.279244	0.573175	0	0	0.116386	0	0	0.19989	0.531704	0.158984	0.219716	0.243009	0.111051	0.522946	0.260191
AC104653.2	0	0	0	0	0	0	0	0	0	0	0	0	0	0	0	0	0	0	0	0	0	0	0	0	0	0	0	0	0	0	0.153546	0	0	0.314154	0	0	0	0	0	0	0	0	0	0	0	0	0	0	0
AC110769.2	0	0.0639811	0.132244	0.156897	0.207007	0	0.108051	0.0618092	0.0994543	0.103103	0.137099	0.137522	0.0699922	0.16296	0	0.0799794	0.155547	0	0.133048	0	0.0610902	0.0847062	0	0.0739641	0.0601399	0	0.0496398	0.255284	0.0660083	0.0877553	0.100939	0.0789544	0.0876759	0.0615802	0.0617796	0	0.174764	0.151365	0.102299	0.0451138	0.0768486	0	0.104088	0.0605955	0	0	0.0607777	0.0932692	0.107398
LINC01191	0	0	0.0809582	0.21113	0	0.170696	0	0.0874334	0.129639	0	0.122224	0.27046	0	0.126691	0	0.20321	0	0	0.169274	0	0.115815	0.117308	0.232873	0.0552087	0.207205	0	0.0824789	0	0.156336	0	0.052302	0	0.0876759	0.0615802	0.267194	0.172296	0.126691	0.121937	0	0.156112	0	0.0639811	0.19307	0.235958	0	0.413824	0.126244	0.0932692	0
AC110769.1	0.162355	0	0	0	0	0	0	0	0	0	0	0	0	0.0420811	0	0	0.0810574	0	0	0	0	0.117308	0	0	0	0	0	0	0	0	0	0	0	0	0	0	0	0	0	0.0653709	0	0.0639811	0	0.0425379	0	0.0738419	0	0.155008	0
AC010982.1	0	0	0	0	0	0	0	0	0	0	0	0	0	0	0	0	0	0	0	0	0	0	0	0	0	0	0	0	0	0	0	0	0	0	0	0	0	0	0	0	0	0	0	0	0	0	0	0	0
AC009404.1	1.40891	0.76624	0.794989	1.5057	1.26016	0.965457	1.45693	0.903833	1.53064	1.09872	0.805807	0.954231	1.31688	0.814423	0.823073	0.954231	1.65321	1.00992	1.5488	1.20399	1.30022	0.849766	0.800055	0.921406	1.87561	0.896278	1.19436	0.787916	0.528473	0.721106	1.02621	1.62732	0.301421	0.82037	0.635336	0.622802	0.843035	1.22886	0.604777	0.714133	1.18706	1.03965	1.01354	1.43746	0.917047	0.770349	1.62732	0.908028	0.86603
THORLNC	0.140425	0.266534	0.196926	0.23674	0.137099	0.207007	0.153295	0.170837	0.347435	0.26839	0	0.252474	0.34402	0	0.19968	0.583516	0.205824	0.394318	0.0898529	0.363123	0.562504	0.249807	0.754772	0.257865	0.389041	0.347049	0.228841	0.317775	0.194214	0.49647	0.223522	0	0	0.195362	0.267194	0.3164	0.536664	0.167156	0.116386	0.330099	0.23264	0	0.127008	0.158984	0.369494	0.171898	0	0.186895	6.30796
LINC01956	0	0	0	0.167542	0	0	0	0.214589	0	0	0.257603	0	0.157816	0.0601399	0	0	0	0.226334	0	0.130873	0	0	0.198802	0	0.108513	0	0.215476	0.113642	0.194214	0.115687	0.0790515	0	0	0.0996802	0.461822	0	0	0	0	0.0889081	0.144911	0.0886302	0.21113	0.072017	0	0	0	0	0
AC012363.2	0	0	0	0	0	0	0	0	0	0.368002	0	0.17368	0	0	0	0	0	0	0	0	0	0	0	0	0	0	0	0	0.143923	0	0	0	0	0	0	0	0	0	0	0	0	0	0	0	0	0	0	0	0
AC073257.2	0.275348	0	0.297649	0.196086	0	0.170696	0.17487	0	0.224402	0	0.122224	0.433497	0.102666	0.0826448	0	0	0	0.380608	0.439134	0	0	0.198081	0.573175	0.266534	0.376391	0.288384	0	0	0.156336	0	0	0	0.378048	0	0	0	0	0.580789	0.132626	0.103693	0	0	0.363498	0	0	0	0	0.259131	0
AC073257.1	0	0	0	0	0	0	0	0	0	0	0	0	0	0	0	0	0	0	0	0	0	0	0	0	0	0	0	0	0	0	0	0	0	0	0	0	0	0	0	0	0	0	0	0	0	0	0	0	0
AC018866.1	0	0	0	0	0	0	0	0	0	0	0	0	0	0	0	0	0	0	0	0	0	0	0	0	0	0	0	0	0	0	0	0	0	0	0	0	0	0	0	0	0	0	0	0	0	0	0	0	0
AC017033.1	0.112465	0	0.107684	0	0	0	0	0	0	0	0	0	0	0.0508555	0.157055	0	0	0	0	0	0	0	0	0	0.096952	0	0	0	0	0	0	0	0	0	0	0	0	0	0	0.142766	0	0	0	0	0	0	0	0	0
AC067960.1	0	0	0	0	0	0	0	0	0	0	0	0	0	0	0	0	0	0	0	0	0	0	0	0	0	0	0	0	0	0	0	0	0	0	0	0	0	0	0	0	0	0	0	0	0	0	0	0	0
LINC01823	0	0	0	0	0	0	0	0	0	0	0	0	0	0	0	0	0	0	0	0	0	0	0	0	0	0	0	0	0	0	0	0	0	0	0	0	0	0	0	0	0	0	0	0.182563	0	0	0	0	0
AC062020.1	0	0	0	0	0	0	0	0	0	0	0	0	0	0	0	0	0	0	0	0	0	0	0	0	0	0	0	0	0	0	0	0	0	0	0	0	0	0	0	0	0	0	0	0	0	0	0	0	0
LINC01826	0	0	0	0	0	0	0	0	0	0	0	0	0	0	0	0	0	0	0	0	0	0	0	0	0	0	0	0	0	0	0	0	0	0	0	0	0	0	0	0	0	0	0	0	0	0	0	0	0
AC073409.1	0	0	0	0	0	0	0	0	0	0	0	0	0	0	0	0	0	0	0	0	0	0	0	0	0	0	0	0	0	0	0	0	0	0	0	0	0	0	0	0	0	0	0	0	0	0	0	0	0
LINC01941	0	0	0	0	0	0	0	0	0	0	0	0	0	0	0	0	0	0	0	0	0	0	0	0	0	0	0	0	0	0	0	0	0	0	0	0	0	0	0	0	0	0	0	0	0	0	0	0	0
AC023347.1	0	0	0	0	0	0	0	0	0	0	0.0947576	0	0	0	0	0	0	0	0	0	0	0	0	0	0	0	0	0	0	0	0.0790515	0	0	0	0	0	0	0	0	0	0	0	0	0	0	0	0	0	0
AC012508.2	0	0	0.0643588	0.099212	0.117042	0.0678785	0.0845854	0	0.056587	0.103103	0	0.0794373	0	0.0352676	0	0.266918	0.0810574	0	0.0944701	0.0703533	0.0610902	0.0847062	0.111051	0.146026	0.141664	0.0813551	0.181119	0.0821694	0	0.0625547	0	0	0	0	0.0428617	0	0.264267	0	0.0541223	0.0889081	0.0768486	0.160747	0.104088	0.0308068	0	0	0	0	0.0811566
AC012508.1	0.0503764	0	0	0	0	0	0	0	0.0388806	0	0.0391027	0	0	0	0	0.0456669	0	0	0.0383504	0	0.038132	0	0	0.0293945	0	0	0.0406721	0	0	0.0502553	0.028215	0	0.0475765	0	0	0.107563	0	0	0	0	0	0	0.0409732	0.0230708	0	0.0337191	0.0362386	0.0584458	0
AC012306.2	2.89935	2.7678	1.90117	1.25501	3.07546	1.64917	2.0699	1.78099	1.65321	2.42791	3.07546	2.44713	1.67495	1.87045	2.02013	2.08263	1.94813	1.3446	2.56815	1.76721	1.95343	1.51268	2.35747	1.97059	2.49651	1.70698	1.81026	1.82991	2.49651	1.93636	1.91314	2.1715	2.0084	2.64238	1.75349	2.20801	2.10893	2.37393	2.44713	1.87045	2.52555	1.82991	2.40012	2.19268	2.09589	2.2247	1.64512	1.34748	1.94813
AC012451.1	0	0	0	0	0	0	0	0	0	0	0	0	0	0	0	0	0	0	0	0	0	0	0	0	0	0	0	0	0	0	0	0	0	0	0	0	0	0	0	0	0	0	0	0	0	0	0	0	0
LINC01854	0	0	0	0	0	0	0	0.0500885	0	0	0	0	0	0	0	0.0528177	0	0	0	0	0	0	0	0	0	0	0	0	0.0660083	0	0	0	0	0	0	0	0	0	0	0	0	0	0	0	0	0	0	0	0
LINC02572	0	0	0	0	0.137099	0	0	0	0	0	0	0	0.102666	0	0	0	0.118352	0.135025	0	0	0	0	0	0.0860821	0	0.0973112	0	0	0	0	0.330421	0.164238	0	0.0996802	0	0	0.126691	0	0	0	0	0	0.127008	0	0	0	0	0.139558	0
LINC01856	0	0	0	0	0	0	0	0.0500885	0	0	0	0	0	0	0	0	0	0	0	0	0	0	0	0	0	0.031098	0	0	0	0.0502553	0	0	0	0	0.0353593	0	0	0	0.0428617	0	0	0	0	0	0	0	0	0	0
LINC01120	0	0	0	0	0	0.0678785	0	0	0	0	0	0	0	0	0	0	0	0	0	0	0	0	0	0	0	0	0	0	0	0	0	0	0	0	0	0	0	0	0	0	0	0	0	0.0262927	0	0.0632845	0	0	0
AC073869.3	0.151365	0.856309	0	0.196086	0.527747	0.170696	0	0.137369	0.215716	0.353712	0	0	0	0.0707	0	0.127008	0	0.147819	0	0.152547	0.331093	0	0	0	0.141664	0.207659	0.133364	0	0.143923	0	0	0.62124	0.734412	0.505417	0	0	0	0.167156	0	0.178386	0.296696	0.222233	0	0	0.219716	0.113856	0	0.364275	0.169185
C2orf27B	0.266534	0	0.177617	1.73476	0.888913	0.300474	0.487285	1.89052	0.206154	0.906632	1.37439	0.137522	1.22149	1.27826	1.53407	1.61542	0	1.23138	0.233656	1.10499	0.82037	0.797418	1.35341	0.547393	1.45356	0.589654	1.12393	0.600711	0.824472	1.31127	0.800055	0.572522	1.32516	1.28112	0.516786	0.248543	1.02985	0	1.28677	1.06097	0.616453	1.24706	0.495852	0.191846	1.03965	0.494781	0.541391	0.259131	0.776173
AC103564.1	0	0	0	0	0	0	0.163449	0	0	0	0	0	0.102666	0.0707	0	0	0.118352	0	0	0	0	0	0	0.0860821	0	0.258353	0.118201	0	0	0	0	0	0	0.208386	0.0986464	0	0	0	0	0	0.166878	0	0.127008	0.0844284	0	0	0	0.139558	0
AJ239322.2	0	0	0	0	0	0	0	0	0	0	0	0	0	0	0	0	0	0	0	0	0	0	0	0	0	0	0	0	0	0	0	0	0	0	0	0	0	0	0	0	0	0	0	0	0	0	0	0	0
AJ239322.1	0	0	0	0	0	0	0	0	0	0	0	0	0	0	0	0	0	0	0	0	0	0	0	0	0	0	0	0	0	0	0	0	0	0	0	0	0	0	0	0	0	0	0	0	0	0	0	0	0
LINC01945	0	0	0	0	0	0	0	0.0874334	0	0	0	0	0	0	0	0	0	0.0942899	0	0	0	0	0	0	0	0	0.133364	0	0	0	0	0	0.142431	0	0	0	0	0	0	0.0653709	0	0	0	0	0	0	0	0	0
AC097532.1	0	0	0	0	0	0	0	0	0	0	0	0	0	0	0	0	0	0	0	0	0	0	0	0	0	0	0	0	0	0	0	0	0	0	0	0	0	0	0	0	0	0	0	0	0	0	0	0	0
AC097532.2	0.217589	0.0395809	0.107684	0	0.137099	0.121716	0.126915	0.170837	0.109161	0.303184	0	0.10704	0.0451138	0.0508555	0	0.0699367	0.205824	0.194046	0.128965	0.152547	0.0721797	0	0.144026	0.0860821	0.096952	0.140425	0.118201	0.0971508	0.105873	0.102015	0.153546	0.218791	0.128965	0.181745	0.0723851	0	0.113783	0	0.116386	0.142766	0.105362	0.184631	0.0944701	0.036151	0.102924	0.0844284	0.0607777	0.0695902	0.0811566
AC011243.1	0	0	0	0	0	0	0	0	0	0	0	0	0	0	0	0	0	0	0	0	0	0	0	0	0	0	0	0	0	0	0	0	0	0	0	0	0	0	0	0	0	0	0	0	0	0	0	0	0
AC068492.1	0	0	0	0	0	0	0	0	0	0	0	0.211772	0	0	0	0	0	0	0	0	0	0	0	0	0	0	0	0	0	0	0	0	0	0	0	0	0	0	0	0	0	0	0	0.104715	0	0	0	0	0
LINC01832	0.255892	0	0	0	0	0	0	0	0	0	0	0	0	0	0	0	0	0	0.154389	0	0.257293	0.178386	0	0	0	0	0	0	0	0	0	0	0	0	0	0	0	0	0	0	0	0	0	0	0	0	0	0	0
AC114763.1	0	0	0.116846	0	0	0.107146	0.108051	0.20092	0.119629	0.290394	0	0	0	0.152237	0.136733	0.0799794	0.0698812	0.215268	0.103339	0.0976288	0.115815	0.105362	0	0.0552087	0.141664	0.154124	0.203954	0.317775	0.143923	0.0877553	0.100939	0	0	0.167542	0.115181	0	0.126691	0.259131	0.0752674	0.23674	0.182749	0	0.0754249	0.182563	0.238171	0.0738419	0.111051	0.213944	0.218791
AC062021.1	0	0	0	0	0	0	0	0	0	0	0	0	0.102666	0	0	0	0	0	0	0	0	0	0	0	0	0	0	0	0	0	0	0	0	0	0	0	0	0	0	0	0	0	0	0	0	0	0	0	0
AC016710.1	0	0	0	0	0	0	0	0	0	0	0	0	0	0	0	0	0	0	0	0	0	0	0	0	0	0	0	0	0	0	0	0	0	0	0	0	0	0	0	0	0	0	0	0	0	0	0	0	0
AC078851.1	0	0	0	0	0	0	0	0	0	0	0	0	0	0	0	0	0	0	0	0	0	0	0	0	0	0	0	0	0	0	0	0	0	0	0	0	0	0	0	0	0	0	0	0	0	0	0	0	0
LINC01853	0	0	0	0	0	0	0	0	0	0	0	0	0	0	0	0	0	0	0	0	0	0	0	0	0	0	0	0	0	0	0	0	0	0	0	0	0	0	0	0	0	0	0	0	0	0	0	0	0
AC079584.1	0	0	0	0	0	0	0	0	0	0	0	0	0	0	0	0	0	0	0	0	0	0	0	0	0	0	0	0	0	0	0	0	0	0	0	0	0	0	0	0	0	0	0	0	0	0	0	0	0
LINC01412	0	0	0	0	0	0	0	0	0	0	0	0	0	0.178919	0	0	0	0	0	0	0	0	0	0	0	0.195162	0	0	0	0	0.192639	0	0	0	0	0	0.252474	0	0	0	0.35149	0	0	0	0	0.261859	0.389041	0	0
TEX41	0.0735923	0.275007	0.297649	0.490544	0.137099	0.121716	0.144781	0.156336	0.231982	0.0935807	0.225954	0	0	0.603361	0.315215	0.114224	0.282152	0.226334	0.0898529	0.0976288	0.0844284	0.552354	0.290394	0.383198	0.141664	0.549466	0.10493	0.687938	0.194214	0.145026	0.433497	0.229831	0.107684	0.0860821	0.161123	0.3894	0.232194	0.151365	0.25397	0.103693	0.115602	0.451024	0.329385	0.302275	0	0.0337191	0.0521215	0.259131	0.244208
LINC01966	0	0	0	0	0	0	0	0	0	0	0	0	0	0	0	0	0	0	0	0	0	0	0	0	0	0	0	0	0	0	0	0	0	0	0	0	0	0	0	0	0	0	0	0	0.153667	0	0	0	0
AC096666.1	0	0	0	0	0	0	0	0	0	0	0	0	0	0	0	0	0	0	0	0	0	0	0	0	0	0	0	0	0	0	0	0	0	0	0	0	0	0	0	0	0	0	0	0	0	0	0	0	0
AC092484.1	0	0	0	0	0	0	0	0	0	0	0	0	0	0	0	0	0	0	0	0	0	0	0	0	0	0	0	0.0821694	0	0	0	0	0	0	0	0	0	0	0	0	0	0	0	0	0	0	0	0	0
AC079163.1	0	0	0	0	0	0	0	0	0	0	0	0	0	0	0	0	0	0	0	0	0	0	0	0	0	0	0	0	0	0	0	0	0	0	0	0	0	0	0	0	0	0	0	0	0	0	0	0	0
AC062031.1	0	0	0	0	0	0	0	0	0	0	0	0	0	0	0	0	0	0	0	0	0	0	0	0	0	0	0	0	0	0	0	0	0	0	0	0	0	0	0	0	0	0	0	0.0504427	0.17057	0	0	0	0
LINC01911	0	0	0	0	0	0	0	0	0	0	0	0	0	0	0	0	0	0	0	0	0	0	0	0	0	0	0	0	0	0	0	0	0	0	0	0	0	0	0	0	0	0	0	0	0	0	0	0	0
AC062032.1	0	0	0	0	0	0	0	0	0	0	0	0	0	0	0	0	0	0	0	0	0	0	0	0	0	0	0	0	0	0	0	0	0	0	0	0	0	0	0	0	0	0	0	0	0	0	0	0	0
LINC01931	0	0	0	0	0	0	0	0	0	0	0	0	0	0	0	0	0	0	0	0.0840091	0.038132	0	0	0	0	0	0	0	0	0	0.0328534	0	0	0	0	0	0	0	0	0.036151	0	0	0	0	0	0	0	0	0
LINC01818	0	0	0	0	0	0	0	0	0	0	0	0	0	0	0	0	0	0	0	0	0	0	0	0	0	0	0	0	0	0	0	0	0	0	0	0	0	0	0	0	0	0	0	0	0	0	0	0	0
LINC01817	0	0	0	0	0	0	0	0	0	0	0	0	0	0	0	0	0	0	0	0	0	0	0	0	0	0	0	0	0	0	0	0	0	0	0	0	0	0	0	0	0	0	0	0	0	0	0	0	0
LINC01920	0	0	0	0	0	0	0	0	0	0	0	0	0	0	0	0	0	0	0	0	0	0	0	0	0	0	0	0	0	0	0	0	0	0	0	0	0	0	0	0	0	0	0	0	0	0	0	0	0
AC104777.2	0	0	0	0	0	0	0	0	0	0	0	0	0	0	0	0	0	0	0	0	0	0	0	0	0	0	0	0	0	0	0	0	0	0	0	0	0	0	0	0	0	0	0	0	0	0	0	0	0
AC104777.1	0	0	0	0	0	0	0	0	0	0	0	0	0	0	0	0	0	0	0	0	0	0	0	0	0	0	0	0	0	0	0	0	0	0	0	0	0	0	0	0	0	0	0	0	0	0	0	0	0
AC018731.1	0	0	0	0	0	0	0	0	0	0	0	0	0	0	0	0	0	0	0	0	0	0	0	0	0	0	0	0	0	0	0	0	0	0	0	0	0	0	0	0	0	0	0	0	0	0	0	0	0
LINC01850	0	0	0	0	0	0	0	0	0	0	0	0	0	0	0	0	0	0	0	0	0	0	0	0	0	0	0	0	0	0	0	0	0	0	0	0	0	0	0	0	0	0	0	0	0	0	0	0	0
AC009227.2	0	0	0	0	0	0	0	0	0	0	0	0	0	0	0	0	0	0	0	0	0	0	0	0	0	0	0	0	0	0	0	0	0	0	0	0	0	0	0	0	0	0	0	0	0	0	0	0	0
AC092625.1	0	0	0	0	0	0	0	0	0	0	0	0	0	0	0	0	0	0	0	0	0	0	0	0	0	0	0	0	0	0	0	0	0	0	0	0	0	0	0	0	0	0	0	0	0	0	0	0	0
LINC01876	0.440026	0.224267	0.880084	0.400725	0.395289	0.384845	0.844363	0.227542	0.394804	0.179222	0.417482	0.353712	0.884523	0.171139	0.441409	0.52913	0.424418	0.330099	0.169274	0.293349	0.47622	0.636086	0.596339	0.2825	0.458598	1.18706	0.215476	0.210736	0.570994	0.213785	0.707402	0.540795	0.606176	0.302008	0.876083	0.558863	0.264267	0.212558	1.13907	0.103693	0.578542	0.451024	0.163601	0.277605	0.844363	0.312666	0.556658	0.272207	0.302008
AC013731.1	0.266534	0.480383	0.37599	0.490544	0.490544	0.338794	0.512306	0.137369	0.25003	0.498243	0.346259	0.10704	0.277891	0.464806	0.452112	0.540795	0.181428	0.0844284	0.597035	0.0976288	0.3096	0.105362	0.144026	0.299933	0.25426	0.154124	0.443504	0.363874	0.316762	0.188388	0.602581	0.416059	0.256793	0.219437	0.0617796	0.172296	0.525428	0.550162	0.186481	0.473073	0.245165	0.541391	0.573777	0.2607	0.141362	0.129128	0.313554	0.201099	0.276182
AC005042.2	0	0	0	0	0	0	0	0	0	0	0	0	0	0	0	0	0	0	0	0	0	0	0	0	0	0	0	0	0	0	0	0	0	0	0	0	0	0	0	0	0	0	0	0	0	0	0	0	0
AC009961.1	0.40122	0.491626	0.368002	0.320776	0.237913	0.518051	0.258855	0.690024	0.458598	0	0.492711	0	0.76624	0.255284	0.32676	0	0.564612	0.0942899	0.419196	0.460718	0.422565	0.526036	0.498243	0.2825	0.401715	0.477213	0.718049	0.210736	0.254765	0.386174	0.293096	0.0896522	0.389041	0.0615802	0.316084	0.3894	0.627902	0.65587	0.350529	0.526036	0.277149	0.475561	0.298224	0.132491	0	0.243009	0.473486	1.03372	0.604142
LINC01806	0.589654	1.11126	0.0486975	0.952659	2.14991	0	0	0.584295	0.487285	0.859242	2.30414	2.19268	0.884523	0	0.936734	0.518051	0.952659	0.821721	0.47622	0.648297	0.412982	1.31127	0.946407	0.0293945	2.3388	1.36242	1.27309	1.36846	1.18706	1.0969	0.364275	2.2247	1.23409	2.46642	1.61162	0.451568	0.881563	0.939747	0.965457	2.02622	0	1.02985	0.768143	1.63167	0.552354	1.59545	1.17272	0.955803	2.63113
AC008063.2	0	0	0	0	0	0	0	0	0	0	0	0	0	0	0	0	0	0	0	0	0	0	0	0	0	0	0	0	0	0.115687	0	0	0	0	0	0	0	0	0	0	0	0	0	0	0	0	0	0	0
AC009495.3	0	0.283386	0.349453	0	0.506705	0.584295	0.117503	0.519388	0.341102	0.239765	0.634585	0.389041	0.615749	0.202702	0.708282	0.42715	0.118352	0.360406	0.113712	0.152547	0.354657	0.328666	0.354184	0.455492	0.642346	0.0566978	0.396087	0.550162	0.423399	0	0.263065	0.114581	0.793833	0.637927	0.382237	0.280533	0.273856	0.292212	0.116386	0.21128	0.277149	0.246214	0.263251	0.431987	0	0.348056	0.260932	0.236497	0.451568
AC009495.1	0.458035	0	0	0.824472	0	0.3214	0	0.0874334	0	0	0	0.402151	0	0.784316	0.762833	0.152772	0.317124	0.269069	0.46745	0.363123	0	0.301715	0	0.064504	0	0.185432	0	0	0	0.435917	0	0	0.67583	0.0734772	0	0	0.197072	0	0.674915	0.384458	0.35149	0.19989	0	0.346259	0	0.0976288	0	0	0
AC073050.1	0	0.145904	0	0	0	0	0	0	0	0	0	0	0	0	0	0	0	0	0	0	0	0	0	0	0	0	0	0	0	0	0.126915	0	0	0	0	0	0	0	0.161246	0	0	0.145484	0	0	0	0	0	0	0
LINC01124	0.275348	0.175923	0.190196	0.108305	0.310169	0.264267	0.135988	0.0874334	0.0899951	0.136141	0.137099	0.0929584	0.0451138	0.0826448	0.169573	0.20321	0.143923	0.0942899	0.0735347	0.0557975	0.115815	0.117308	0	0.108409	0.238171	0.164238	0.133364	0.166069	0.095252	0.145026	0.0699367	0.294478	0.30865	0.0996802	0.222043	0	0.232194	0.0996123	0.213413	0.190961	0.296696	0.28365	0.0944701	0.31908	0.201975	0.1433	0.197508	0.0816648	0.260191
AC007405.3	1.08465	1.10499	1.24197	1.48416	1.14797	1.45693	1.11768	1.40891	2.73521	1.27826	1.56793	1.5836	0.873061	0.778503	1.48098	1.3837	0.647428	1.75349	0.758208	1.16158	1.09872	1.49117	1.59545	0.933561	1.77192	1.26792	1.39246	1.32516	1.64512	1.18037	0.654258	1.44696	1.07471	1.68882	1.01533	0.35503	1.59149	1.15455	1.47406	2.17857	1.19683	1.03965	0.82587	1.51656	0.973613	1.6983	1.36544	0.867408	1.09294
DLX2-DT	0	0	0	0	0	0	0	0	0	0	0	0	0	0	0	0	0	0	0	0	0	0	0	0	0	0	0	0	0	0	0	0	0	0	0	0	0	0	0	0	0	0	0	0	0	0	0	0	0
AC104088.1	0	0.129238	0.240208	0	0	0	0	0.499309	0.793833	0.227727	0.237061	0.192026	0.117983	0	0	0.152772	0.133206	0.159604	0.533679	0	0	0	0	0	0.289635	0.112899	0.148781	0.146309	0	0	0.609427	0	0	0	0.222043	0.670491	0	0	0.941402	0.117218	0.196926	2.64238	0.15303	0.191846	2.04377	0.1433	0.336657	0	2.14991
AC106900.1	0	0	0	0	0	0	0	0	0	0	0	0	0	0	0	0	0	0	0	0	0	0	0	0	0	0	0	0	0	0	0	0	0	0	0	0	0	0	0	0	0	0	0	0	0	0	0	0	0
AC016737.1	0.899289	0.441872	0.595611	0.463406	0.425567	0.188935	0.581424	0.377232	0.737517	0.454969	0.137099	0.791551	0.369156	0.803534	0.673193	0.437043	0.701427	0.394318	0.602581	0.0840091	0.422565	0.627131	0.328341	0.333465	0.207205	0.337907	0.515641	0.550162	0.409572	0.481333	0.902277	0.30865	0.331093	0.289011	0.243559	0.506061	0.425177	0.452689	0.840349	0.526036	0.678689	0.360777	0.418765	0.346259	0.335028	0.413824	0.417929	0.552898	0.260191
AC016737.2	0	0	0	0	0	0	0	0	0	0	0	0	0	0	0	0	0	0	0	0	0	0	0	0	0.289635	0	0	0	0	0	0	0	0	0	0	0	0	0	0	0	0	0	0	0	0	0.261859	0	0	0
LINC01960	0	0.0565523	0	0	0	0.0678785	0	0	0	0	0.0711879	0.0794373	0	0.0258953	0.0985749	0	0	0	0	0	0.0844284	0	0	0	0.096952	0.031098	0	0.0889081	0	0	0.0328534	0	0.0565176	0	0	0	0	0.087163	0.0647148	0.036151	0.0665708	0	0	0.0504427	0	0	0	0	0
LINC01305	0	0	0.107684	0.0798836	0.0538441	0.0563907	0	0	0.0730065	0.0935807	0.0711879	0	0.0451138	0.0938491	0	0.0456669	0.0925858	0.0501565	0.0615802	0.0703533	0.038132	0.105362	0	0.117879	0.0479195	0.0464287	0.0496398	0.0658188	0	0.102015	0.0328534	0	0.0669142	0	0.115181	0	0.0721797	0	0	0.0451138	0	0.101474	0	0.0504427	0.129713	0.0416868	0.0437526	0.0584458	0.0811566
AC093459.1	0	0	0	0	0	0	0	0	0	0	0	0	0	0	0	0	0	0	0	0	0	0	0	0	0	0	0	0	0	0	0	0	0	0	0	0	0	0	0	0	0	0	0	0	0	0	0	0	0
AC016751.1	0	0	0	0	0	0	0	0	0	0	0	0	0	0	0	0	0	0	0	0	0	0	0	0	0	0	0	0	0	0	0	0	0	0	0	0	0	0	0	0	0	0	0	0	0	0	0	0	0
HAGLROS	0.284526	0.21739	0.0907908	0.117784	0.190473	0.188935	0.100033	0.257865	0.0994543	0.119319	0.0947576	0.304867	0.145262	0.0300284	0.243884	0	0	0.204551	0.145026	0.0840091	0.115815	0.1433	0.134235	0.0739641	0.157959	0.0684425	0	0.0658188	0.156336	0.229304	0.213785	0.105873	0.153295	0.0860821	0.210282	0	0.138884	0.0996123	0.116386	0.0544015	0.182749	0.130815	0.104088	0.072017	0.129713	0.0632845	0	0.31745	0.201814
AC017048.2	0	0	0	0	0	0	0	0	0	0	0	0	0	0	0	0	0	0	0	0	0	0	0	0	0	0	0	0	0	0	0	0	0	0	0	0	0	0	0	0	0	0	0	0	0	0	0	0	0
AC017048.3	0.284526	0.21739	0	0	0	0	0	0	0	0	0.0711879	0	0.117983	0.0826448	0	0.152772	0.0810574	0	0.133048	0.0976288	0	0.216963	0.250253	0.0552087	0	0	0	0.0889081	0	0	0.0612724	0	0	0.0734772	0.12744	0	0.138884	0	0.0752674	0.0653709	0.266272	0.0639811	0	0	0	0	0.0704447	0	0
LINC01116	0.198802	0.582737	0.459662	0.280006	0.237913	0.152547	0.369494	0.227542	0.307023	0.227727	0.237061	0.12273	0.117983	0.370949	0	0.190196	0.168686	0.0942899	0.336657	0.225009	0.386591	0.465841	0.290394	0.247842	0.224402	0.32676	0.0824789	0.317775	0.277605	0.273856	0.299636	0.52702	0.117405	0.338483	0.150114	0.3894	0.0817826	0.347049	0.53302	0.0653709	0.3096	0.408839	0.281781	0.277605	0.35101	0.243009	0.0704447	0.155008	0.350042
LINC01117	0.188575	0.266534	0	0	0	0	0	0	0	0	0.0831862	0	0	0	0	0	0	0.114988	0	0	0.146946	0	0	0	0	0	0	0	0	0	0.136637	0	0.107684	0.153295	0.0723851	0	0	0	0	0	0	0.0763144	0	0	0	0.0844284	0	0	0
AC092162.2	0	0	0	0	0	0	0	0	0	0	0	0	0	0	0	0	0	0	0	0	0	0	0	0	0	0.031098	0	0	0	0	0	0	0	0	0	0	0	0	0	0	0	0	0	0.0230708	0	0	0	0	0
AC074286.1	0	0	0	0	0	0	0	0	0	0	0	0	0	0.16296	0	0	0	0	0	0	0	0	0	0	0	0	0	0	0	0	0	0	0	0	0	0	0	0	0	0	0	0	0	0	0	0	0	0	0
AC010680.4	0.936734	1.53064	0.572522	1.11126	0.646558	0.871436	0.487285	0.886004	0.541391	0.754772	1.52721	0.211772	1.05132	0.709163	1.22634	1.08677	1.07869	0.912229	0	1.06851	0.765113	1.08061	0.623634	0.912229	1.12848	1.69356	1.33907	1.64917	1.1435	0.835098	0.874687	1.04934	1.30612	1.39246	1.05132	1.42745	1.11976	1.09294	0.326487	1.6983	1.17056	0.967147	1.11343	0.800055	1.79572	1.40891	0.494213	1.46662	1.29211
AC010680.5	0	0.266534	0.107684	0.411052	0	0.556658	0	0.170837	0	0	0.150203	0.521828	0.240208	0.291848	0	0.437043	0.400725	0.330099	0	0	0.482224	0.233204	0.290394	0.216963	0.325289	0.125759	0.567303	0.713166	0.734412	0	0.23343	0.847201	0.441872	0	0	0.3164	0.402586	0	0.293891	0.630581	0.395289	0	0.682343	0.115371	0.481333	0.15674	0.271455	0.170445	0.334254
AC093911.1	0	0	0	0	0	0	0	0	0	0	0	0	0	0	0	0	0	0	0	0	0	0	0	0	0	0	0	0	0	0	0	0	0	0	0	0	0	0	0	0	0	0	0	0	0	0	0	0	0
AC009478.1	0	0	0	0	0	0	0	0	0	0	0	0	0	0	0	0	0	0	0	0	0	0	0	0	0	0	0	0	0	0	0	0	0	0	0	0	0	0	0	0	0	0	0	0	0	0	0	0	0
SCHLAP1	0	0	0.0486975	0	0	0	0	0	0	0	0	0	0	0	0	0	0	0	0	0	0	0	0	0	0	0	0	0	0	0	0	0	0	0	0	0	0	0	0	0	0	0	0	0	0	0	0	0	0
AC068196.1	0.246362	0.0639811	0.205117	0	0.156224	0	0.204551	0	0.0813551	0	0	0.211772	0	0.0420811	0.147045	0.13929	0.3581	0	0.280006	0.0976288	0	0	0	0	0.0841812	0	0.203954	0.236106	0	0	0.136637	0	0.117405	0	0	0.54403	0	0.259131	0.132626	0	0.115602	0	0	0	0.335028	0	0	0.0932692	0
AC020595.1	0	0	0	0	0	0	0	0	0	0	0	0	0	0	0	0	0	0	0	0	0	0	0	0	0	0	0	0	0	0	0	0	0	0	0	0	0	0	0	0	0	0	0	0	0	0	0	0	0
AC013733.1	0	0	0	0	0	0	0	0	0.109161	0	0	0	0	0	0	0	0	0	0	0	0	0	0	0	0	0	0	0	0	0	0	0	0	0	0	0	0	0	0	0	0	0	0	0	0	0	0	0	0
AC021851.1	0.412528	0.190473	0.439134	0.507726	0.490544	0.425567	0.574378	0.170837	0.59773	0.637927	0.346259	0.600012	0.425956	0.572522	0.371497	0.285304	0.534245	0.292836	0.627902	0.433497	0.59353	0.407589	0.36645	0.333465	0.25426	0.423399	0.316762	0.461822	0.289011	0.312462	0.52482	0.554821	0.0765726	0.289011	0.12744	0.280533	0.252474	0.900721	0.310471	0.36687	0.430385	0.434966	0.640653	0.277605	0.698474	0.243009	0.629741	0.483778	0.350042
AC093639.1	0	0	0	0	0	0	0	0	0	0	0	0	0	0	0	0	0	0	0	0	0	0	0	0	0	0	0	0	0	0	0	0	0	0	0	0	0	0	0	0	0	0	0	0	0	0	0	0	0
LINC01473	0.301421	0.209963	0.880084	0.311594	0.343247	0.484324	0.432977	0.156336	0.42758	0.770349	0.405839	0.211772	0.227163	0.301421	0.273605	0.637007	0.534245	0.31441	0.536664	0.516225	0.209578	0.159604	0.185529	0.383198	0.0721797	0.82037	0.148781	0.511016	0.394804	0.273856	0.588984	0.243376	0.489912	0.376793	0.444027	1.10285	0.149829	0.591134	0.25397	0.377232	0.35149	0.568656	0.518051	0.310471	0.335028	0.202175	0.126244	0.225495	0.478752
AC017071.1	0.112465	0.0907908	0.116846	0.21113	0.0841812	0.207007	0.144781	0.0737704	0.138539	0.136141	0.107146	0.0661714	0.0558893	0.269636	0	0.0528177	0.0605955	0.0570073	0.0415507	0	0.115815	0	0.122371	0.176089	0.0721797	0.154124	0.133364	0.0821694	0.208851	0.102015	0.100939	0.0896522	0.117405	0.0515669	0.0723851	0.172296	0.0621069	0.136733	0.116386	0.103693	0.166878	0.116056	0.0754249	0.0425379	0.201975	0.052235	0.0953538	0.0932692	0.0461531
AC092614.1	0.198802	0.234604	0.41159	0.478325	0.2825	0.384845	0.444505	0.302863	0.206154	0	0.107146	0.17368	0.145262	0.370949	0.214781	0.127008	0.218662	0.360406	0.137522	0.225009	0.146946	0.271455	0.776173	0.322436	0.25426	0.232406	0.0710338	0.452112	0.254765	0.229304	0.380608	0.229831	0.128965	0.167542	0.150114	0.158164	0.349063	0.242826	0.132626	0.224267	0.245165	0.256343	0.319454	0.370949	0.141362	0.129128	0.260932	0.292575	0.260191
AC062039.1	0	0	0	0	0	0	0	0	0	0	0	0	0	0	0	0	0	0	0	0	0	0	0	0	0	0	0	0	0	0	0	0	0	0	0	0	0	0	0	0	0	0	0	0	0	0	0	0	0
AC013401.1	0	0	0	0	0	0	0	0	0	0	0	0	0	0	0	0	0	0	0	0	0	0	0	0	0	0	0	0	0	0	0	0	0	0	0	0	0	0	0	0	0	0	0	0	0	0	0	0	0
PCGEM1	0	0	0	0	0	0	0	0	0	0	0	0	0	0	0	0	0	0	0	0	0	0	0	0	0	0	0	0	0	0	0	0	0	0	0	0	0	0	0	0	0	0	0	0	0	0	0	0	0
AC068135.2	0	0	0	0	0	0	0	0	0	0	0	0	0	0	0	0	0	0	0	0	0	0	0	0	0	0	0	0	0	0	0	0	0	0	0	0	0	0	0	0	0	0	0	0	0	0	0	0	0
LINC01821	0	0	0	0	0.0699922	0	0	0	0	0	0	0	0	0	0	0	0.0605955	0	0	0	0	0	0	0	0	0	0	0	0	0	0	0	0	0	0	0	0	0	0	0	0	0	0	0	0	0	0	0.0816648	0
LINC01790	0	0	0	0	0	0	0	0	0	0	0	0	0	0	0	0	0	0	0	0	0	0	0	0	0	0	0	0	0	0	0	0	0	0	0	0	0	0	0	0	0	0	0	0	0	0	0	0	0
AC010983.1	0	0	0	0	0	0	0	0	0	0	0	0	0	0	0	0	0	0	0	0	0	0	0	0	0	0	0	0	0	0	0	0	0	0	0	0	0	0	0	0	0	0	0	0	0	0	0	0	0
AC104823.1	0	0	0	0	0	0	0	0	0	0	0	0	0	0	0	0	0	0	0	0	0	0	0	0	0	0	0	0	0	0	0	0	0	0	0	0	0	0	0	0	0	0	0	0	0	0	0	0	0
LINC01825	0	0	0	0	0	0	0	0	0	0	0	0	0	0	0	0	0	0	0	0.0976288	0	0	0	0	0	0	0	0	0	0	0	0	0	0	0	0	0	0	0	0	0	0	0	0	0	0	0	0	0
LINC01827	0	0	0	0	0	0	0	0	0	0	0	0	0	0	0	0	0	0	0	0	0	0	0	0	0	0	0	0	0	0	0	0	0	0	0	0	0	0	0	0	0	0	0	0	0	0.113856	0	0	0
LINC01923	0	0	0	0	0	0	0	0	0	0	0	0	0	0	0	0	0	0	0	0	0	0	0	0	0	0	0	0	0	0	0	0	0	0	0	0	0	0	0	0	0	0	0	0	0	0	0	0	0
AC019330.1	0	0	0	0	0	0	0	0	0	0	0	0	0	0	0	0	0	0	0	0	0	0	0	0	0	0	0	0	0	0	0	0	0	0	0	0	0	0	0	0	0	0	0	0	0	0	0	0	0
LINC01877	0	0	0	0	0	0	0	0	0	0	0	0	0.0299527	0	0	0	0	0	0	0	0	0	0	0	0	0	0	0	0	0	0	0	0	0	0	0	0	0	0	0	0	0	0	0	0	0	0	0	0
AC007272.1	0	0.145904	0.0643588	0	0	0	0	0	0	0	0.177517	0	0	0	0.116056	0	0	0.0756927	0.0456669	0	0.0610902	0.105362	0.122371	0.0983859	0	0.0386052	0	0	0	0.0625547	0	0.0896522	0	0.0734772	0.0521681	0	0	0.136733	0	0	0	0	0	0	0	0.0844284	0.0607777	0	0
AC069148.1	0.235312	0.283386	0.41159	0.23674	0.173082	0	0.338172	0.302863	0.297419	0.146148	0	0.433497	0.0558893	0.142766	0	0.23343	0.263065	0.105125	0.370365	0.0976288	0.172695	0.328666	0	0.165383	0.238171	0.125759	0.0824789	0.0889081	0.105873	0.156538	0.118688	0	0	0.208386	0.182921	0.298224	0	0.121937	0.148561	0.128965	0.20901	0.130815	0.0849787	0.104715	0.153667	0.0738419	0.260932	0.104843	0
AC064836.2	0	0.145904	0.196926	0.23674	0	0.399784	0	0	0	0.454969	0.623634	0	0.130873	0.209771	0	0.178099	0.282152	0.330099	0.194046	0	0.48928	0	0.683297	0.506705	0.172296	0.125759	0.304254	0.166069	0.613204	0.299172	0.126915	0.229831	0.172496	0.376793	0.254979	0.54403	0.161473	0.38741	0	0.42715	0	0	0.30865	0.218975	0	0.61793	0.271455	0	0.334254
AC064836.3	0.198802	0.844363	0.82037	0.851043	0.680199	0.778503	0.396087	0.347746	1.02621	0.563902	1.10079	1.03569	0.726227	0.572522	0.673193	0.864722	0.816785	0.767191	0.409206	0.687021	0.928783	1.16614	0.735502	0.797418	0.642346	1.00466	0.848483	0.838991	0.935147	1.01533	0.380608	0.407238	1.49117	0.880084	0.807006	0.335028	0.955803	0.509057	0.61793	0.87748	0.770349	1.05536	0.599313	0.527747	0.876083	0.61793	0.970361	0.49647	0.451568
AC009965.1	0	0	0	0	0	0	0	0	0	0	0	0	0	0	0	0	0	0	0	0	0	0	0	0	0	0	0	0	0	0	0	0	0	0	0	0	0	0	0	0	0	0	0	0	0	0	0	0	0
AC009498.1	0	0	0	0	0	0	0	0	0	0	0	0	0	0	0	0	0	0	0	0	0	0	0	0	0	0	0	0	0	0	0	0	0	0	0	0	0	0	0	0	0	0	0	0	0	0	0	0	0
AC016903.1	0	0	0	0	0	0	0	0	0	0	0	0	0	0	0	0	0	0	0	0	0	0	0	0	0	0	0	0	0	0	0	0	0	0	0	0	0	0	0	0	0	0	0	0	0	0	0	0	0
AC016903.2	0	0	0	0	0	0	0	0	0	0	0	0	0	0	0	0	0	0	0	0	0	0	0	0	0	0	0	0	0	0	0	0	0	0	0	0	0	0	0	0	0	0	0	0	0	0	0	0	0
AC008269.2	0	0.0565523	0	0	0	0.08151	0	0	0	0	0	0	0.0699922	0.0508555	0	0	0	0	0	0	0.0498668	0	0	0.0401039	0	0.0464287	0	0.0743268	0	0	0	0	0	0	0	0	0	0.151365	0	0	0.134888	0	0	0	0	0	0	0	0
AC008269.1	0	0.0907908	0	0.156897	0	0.136828	0.231982	0.117308	0.0994543	0.168112	0	0.137522	0.157816	0.126691	0	0	0	0	0	0	0	0	0.185529	0	0.108513	0.154124	0	0	0	0	0	0	0.199298	0.0860821	0.233039	0	0	0.151365	0	0	0	0	0	0.0605955	0	0	0	0	0
AC007879.1	0	0	0	0	0	0	0	0	0	0	0	0	0	0	0	0	0	0	0	0	0	0	0	0	0	0	0	0	0	0	0	0	0	0	0	0	0	0	0	0	0	0	0	0	0	0	0	0	0
AC007879.2	0	0	0	0	0	0	0	0	0	0	0	0	0	0	0	0	0	0	0	0	0	0.342451	0	0	0	0	0	0	0	0	0	0	0	0	0	0	0	0	0	0	0	0	0.127008	0.0844284	0	0	0	0	0
AC007879.4	0	0	0	0	0	0.338794	0	0	0	0	0	0	0	0	0	0	0	0	0.119087	0	0	0	0	0	0	0	0	0	0	0	0	0	0	0	0	0	0	0	0	0	0	0	0	0	0	0	0.223522	0.259131	0
MYOSLID	0	0.0730557	0.0907908	0	0	0.228138	0	0.20092	0	0	0.225954	0	0.0451138	0.247329	0.147045	0.0799794	0	0.0942899	0	0	0	0	0	0	0.0721797	0.164238	0.0824789	0.0743268	0.156336	0	0.0612724	0.186749	0.293349	0	0.138051	0.172296	0	0	0	0.0763144	0.115602	0	0.0754249	0.277605	0	0.0738419	0	0	0
LINC01802	0	0	0	0	0	0	0	0	0.119629	0	0	0	0	0	0	0	0.133206	0	0	0	0	0	0	0	0	0	0	0	0	0	0	0	0	0	0	0	0	0	0	0	0	0	0	0	0	0	0	0	0
LINC01857	0	0	0.0996123	0	0	0	0	0	0	0	0.137099	0.192026	0	0.262086	0	0	0	0	0	0	0.115815	0	0	0	0	0	0	0.155404	0.170241	0	0	0.205824	0	0	0	0	0	0	0	0	0.20901	0	0	0.293891	0.444027	0.1433	0	0	0.302008
LINC01878	0	0	0	0	0	0	0	0	0	0	0	0	0	0	0	0	0	0	0	0	0	0	0	0	0	0	0.0824789	0	0	0	0	0	0	0	0	0	0	0	0	0	0	0	0	0	0	0	0	0	0
AC108066.1	0	0	0	0	0	0	0	0	0	0	0	0	0	0	0	0	0	0	0	0	0.172695	0	0	0	0	0	0	0	0	0	0	0	0	0	0	0	0	0	0	0	0	0	0	0	0	0	0	0	0
AC079610.2	0.412528	0.266534	0.880084	0.267469	0.253687	0.228138	0.463881	0.838991	0.403056	0.388633	0.346259	0.232406	0.145262	0.209771	0.495852	0.456519	0.295672	0.114988	0.395289	0.113929	0.3096	0.129456	0.302863	0.349747	0.565274	0.32676	0.458035	0.338794	0.194214	0.399005	0.690024	0.330421	0.874687	0.473486	0.561072	0.896278	0.161473	0.495852	0.470284	0.803534	0.134888	0.296696	0.30865	0.618843	0.17057	0.261859	0.151652	0.417036	0.515641
LINC01953	0	0	0	0	0	0	0	0	0	0	0	0	0	0	0	0	0	0	0	0	0	0	0	0	0	0	0	0	0	0	0	0	0	0	0	0	0	0	0	0	0	0	0	0	0	0	0	0	0
AC079610.3	0	0	0	0	0	0	0	0	0	0	0	0	0	0	0	0	0	0	0	0	0	0	0	0	0	0	0	0	0	0	0	0	0	0	0	0	0	0	0	0	0	0	0	0	0	0	0	0	0
AC079610.1	0.0664163	0.0395809	0	0	0.137099	0	0.153295	0.0737704	0.0899951	0.127555	0	0	0	0.0826448	0	0.0903218	0.0698812	0	0.0735347	0.0703533	0.0610902	0	0	0.046865	0.0721797	0.0386052	0.148781	0	0	0	0.052302	0.123774	0.128965	0.153295	0.0723851	0	0.0721797	0.087163	0.0541223	0.117218	0.154641	0.0639811	0.049917	0.104715	0.102924	0.0416868	0.0607777	0	0.0811566
AC073284.1	0	0	0	0	0	0	0	0	0	0	0	0	0	0	0	0	0	0	0	0	0	0	0	0	0	0	0	0	0	0	0	0	0	0	0	0	0	0	0	0	0	0	0	0	0	0	0	0	0
AC012462.1	0	0	0	0	0	0	0	0	0	0	0	0	0.0558893	0	0	0	0	0	0	0	0	0	0	0	0	0	0	0	0	0	0	0	0	0	0	0	0	0	0	0	0	0	0.0849787	0	0	0	0	0	0
AC012462.2	0	0	0	0	0	0	0	0	0	0	0	0	0	0	0	0	0	0	0	0	0	0	0	0	0	0	0	0	0	0	0	0	0	0	0	0	0	0	0	0	0	0	0	0	0	0	0	0	0
AC012668.2	0	0	0	0	0	0	0	0	0	0	0	0	0	0	0	0	0	0	0	0	0	0	0	0	0	0	0	0	0	0	0	0	0	0	0	0	0	0	0	0	0	0	0	0	0	0	0	0	0
AC012668.3	0	0	0	0	0	0	0	0	0	0	0	0	0	0	0	0	0	0	0	0	0	0	0	0	0	0	0	0	0	0	0	0	0	0	0	0	0	0	0	0	0	0	0	0	0	0	0	0	0
AC012668.1	0	0	0	0	0	0	0	0	0	0	0	0	0	0	0	0	0	0	0	0	0	0	0	0	0	0	0	0	0	0	0	0	0	0	0	0	0	0	0	0	0	0	0	0	0	0	0	0	0
LINC00607	0.0664163	0.0327141	0.0303587	0.0798836	0.0538441	0.0563907	0	0.0500885	0.064601	0.327033	0.0391027	0.0661714	0.193256	0.0420811	0	0.0699367	0.0508082	0	0.0502827	0.0703533	0.0721797	0	0	0.0401039	0	0.031098	0.0496398	0.0442621	0.0771978	0	0	0	0.0475765	0.114837	0.233039	0	0.0508555	0.0742301	0	0.036151	0	0.0639811	0.114581	0.0425379	0.0896522	0.129128	0	0	0.0461531
LINC01614	0	0	0	0	0	0	0	0	0	0	0	0	0.0699922	0.464806	0	0	0	0	0.066968	0	0.0844284	0	0	0	0	0.154124	0.10493	0.20092	0	0	0	0	0	0	0	0	0	0	0	0	0	0	0	0.201231	0	0	0	0	0
AC122136.1	0	0	0	0	0	0	0	0	0	0	0	0	0	0	0	0	0	0	0	0	0	0	0	0	0	0	0	0	0	0	0	0	0	0	0	0	0	0	0	0	0	0	0	0	0	0	0	0	0
AC093382.1	0	0	0	0	0	0.300474	0	0	0.50065	0	0	0	0	0.541391	0	0.42715	0	0	0.567303	0	0	0	0.389041	0	0	0.174187	0	0.236106	0	0	0	0	0	0.195362	0	0	0	0	0	0	0	0.19989	0	0	0	0	0.197508	0	0
LINC01963	0.819153	1.33083	0.332029	0.891823	1.00992	1.18706	0.713166	0.971885	0.507726	1.13069	1.31688	0.880084	1.13491	0.65587	1.02274	0.98244	0.491626	0.871436	0.42801	1.08465	0.973613	0.797418	0.946407	1.21082	1.15928	0.805807	1.55606	1.2577	1.20854	1.57967	0.784316	1.52382	0.900721	1.45356	1.08677	0.434966	1.05728	0.852319	1.04342	1.13691	1.52721	1.00815	0.812003	1.4629	0.498776	1.08879	0.939747	0.56662	1.02621
AC073321.1	0	0	0.0643588	0	0	0	0	0	0	0	0	0	0	0	0	0	0	0	0	0	0	0	0	0	0	0	0.10493	0	0	0	0	0	0	0	0	0	0	0	0	0	0	0	0	0	0	0	0	0	0
AC007563.1	0	0	0.107684	0	0.325559	0	0	0	0	0.157055	0	0	0	0	0	0.101116	0.168686	0	0	0	0	0	0	0.064504	0	0.0684425	0	0	0.117784	0	0	0	0	0	0	0	0.0916209	0	0	0.142766	0	0	0	0.0605955	0	0	0	0	0
AC007557.1	0	0	0	0	0	0	0	0	0	0	0	0	0	0	0	0	0	0	0	0	0	0	0	0	0	0	0	0	0	0	0	0	0	0	0	0	0	0	0	0	0	0	0	0	0	0.129128	0	0	0
LINC01921	0	0	0	0	0	0	0.832366	0	0	0	0	0	0.169573	0	0	0	0	0.237715	0	0.242136	0	0	0.36645	0	0	0	0	0	0	0	0	0.294478	0	0	0.171139	0	0	0	0	0	0	0.184631	0	0	0	1.89052	0	0	0.244208
AC007749.1	0	0	0	0	0	0	0	0	0	0	0	0	0	0	0	0	0	0	0	0	0	0	0	0	0	0	0	0	0	0	0	0	0	0	0	0	0	0	0	0	0	0	0	0	0	0	0	0	0
DIRC3-AS1	0	0	0	0	0	0	0	0	0	0	0	0	0	0	0	0	0	0	0	0	0	0	0	0	0	0.0973112	0	0	0	0	0	0	0	0	0	0	0	0	0	0	0	0	0	0	0	0	0	0	0.139955
DIRC3	0	0.0395809	0.0907908	0.0798836	0.0996802	0.170696	0.163449	0.117308	0.129639	0.0935807	0.150203	0	0.145262	0.0601399	0.107398	0.23343	0.155547	0.0756927	0.239017	0.113929	0.131225	0.0847062	0.154765	0.064504	0.351901	0.154124	0.228841	0.236106	0.277605	0.273856	0.0455534	0.340809	0.128965	0.127692	0.182921	0.654973	0.174764	0.136733	0.19989	0.0451138	0.245165	0.0763144	0.0675734	0.293891	0	0.444505	0.111051	0.0695902	0.121149
AC009974.1	0.188575	0.714133	0.116846	0	0	0.410044	0.213944	0.319829	0.148781	0.279512	0.164238	0	0	0.389041	0.285621	0.315215	0	0	0.443504	0	0	0.249807	0	0.322436	0.172296	0.140425	0.181119	0.327714	0	0	0	0	0.320129	0	0	0	0	0	0	0.142766	0.23264	0	0	0	0	0.171898	0	0	0
AC097468.3	1.19188	1.43746	0.516786	0.252688	1.82	1.08254	1.55606	0.690024	0.561816	0.947964	1.50191	0.378048	1.42745	0.550162	1.21599	1.14797	0.758208	1.15455	0.970361	1.47779	1.66205	0.899289	1.07264	1.41785	1.03569	0.589654	1.08061	1.20854	0.755853	1.64917	1.05132	2.69937	0.706461	0.276623	1.11976	0.752414	0.771518	1.32229	0.555986	1.0767	1.22886	0.683297	1.42419	1.37143	0.890368	1.22886	1.17789	0.681271	0.941402
AC009955.2	0	0	0	0	0	0	0	0	0	0	0	0	0	0	0	0	0	0	0	0	0.198288	0	0	0	0.141664	0	0	0	0	0.130446	0.100939	0	0.142431	0	0	0	0	0.184948	0	0	0	0	0	0.170445	0	0	0	0.139558	0
AC009502.1	0	0	0	0	0	0	0	0	0	0	0	0	0	0	0	0	0	0	0	0	0.038132	0	0	0	0	0	0	0	0	0	0	0	0.0565176	0	0	0	0	0	0	0	0	0	0	0	0.102924	0	0	0	0
LINC01803	0	0	0	0	0	0	0	0	0	0	0	0	0	0	0	0	0	0	0	0	0	0	0	0	0	0	0	0	0	0	0	0	0	0	0	0	0	0	0	0	0	0	0	0	0	0	0	0	0
AC019211.1	0	0	0	0	0	0	0	0	0	0	0	0	0	0	0	0	0	0	0	0	0	0	0	0	0	0	0	0	0	0	0	0	0	0	0	0	0	0	0	0	0	0	0	0	0	0	0	0	0
AC093083.1	0	0	0	0	0	0	0	0	0	0	0	0	0	0	0	0	0	0	0	0	0	0	0	0	0	0	0	0	0	0	0	0	0	0	0	0	0	0	0	0	0	0	0	0	0	0	0	0	0
AC067956.1	0	0	0	0	0	0	0	0	0	0	0	0	0	0	0	0	0	0	0	0	0	0	0	0	0	0	0	0	0	0	0	0	0	0	0	0	0	0	0	0	0	0	0	0	0	0	0	0	0
AC093843.1	0	0	0	0	0	0	0	0	0	0	0	0	0	0	0	0	0	0	0	0	0	0	0	0	0	0	0	0	0	0	0	0	0	0	0	0	0	0	0	0	0	0	0	0	0	0	0	0	0
AC068489.1	0	0	0	0	0	0	0	0	0	0	0	0	0	0	0	0	0	0	0	0	0	0	0	0	0	0	0	0	0	0	0	0	0	0	0	0	0	0	0	0	0	0	0	0	0	0	0	0	0
AC010980.2	0.131225	0	0.224267	0.311594	0.137099	0.107146	0.213944	0.117308	0.056587	0.464355	0.290394	0.0794373	0.304254	0.262086	0.107398	0.256083	0.0810574	0.0667603	0.180173	0.130873	0.198288	0.198081	0.122371	0.108409	0.157959	0	0.346259	0.0585187	0.365125	0.0625547	0.136637	0.473073	0.0669142	0.0734772	0.210282	0	0.50418	0.259131	0.0541223	0.318715	0.096723	0.116056	0.19307	0.182563	0	0.171898	0.532361	0.125263	0.0941273
AC013448.1	0	0	0	0	0	0	0	0	0	0	0	0	0	0	0	0	0.133206	0	0	0	0	0	0	0	0	0	0	0	0	0	0	0	0	0	0	0	0	0	0	0	0	0	0	0	0	0	0	0	0
AC013448.2	0	0	0	0	0	0	0	0	0	0	0	0	0	0	0	0	0	0	0	0	0	0	0	0	0	0	0	0	0	0	0	0	0	0	0	0	0	0	0	0	0	0	0	0	0	0	0	0	0
AC016717.2	0.0503764	0.0639811	0.026965	0.0798836	0.0538441	0.0563907	0.0759626	0.0618092	0.0388806	0.127555	0.0947576	0.0794373	0.0368208	0.202702	0.089104	0.0799794	0	0.0570073	0.0415507	0.0703533	0	0.0731268	0.111051	0.064504	0.0601399	0.0386052	0.0607777	0.0585187	0.0544015	0.0502553	0.0398842	0.0602366	0.0669142	0.0425379	0.0353593	0.107563	0.0508555	0.0742301	0.0541223	0.036151	0	0.0523496	0.0944701	0.0308068	0	0.0416868	0.0362386	0.0932692	0.0570073
AC062015.1	0	0	0	0	0	0	0	0	0	0	0	0	0	0	0	0	0	0	0	0	0	0	0	0	0	0	0	0	0	0	0	0	0	0	0	0	0	0	0	0	0	0	0	0	0	0	0	0	0
AC010735.2	0.140425	0.182921	0.072017	0.311594	0.490544	0.300474	0.153295	0.419196	0.713166	0.563902	0	0.285853	0.33273	0.324621	0.19968	0.397565	0.367647	0.518755	0.217788	0.259131	0.241292	0.159604	0.482224	0.605412	0	0.0813551	0.228841	0.327714	0	0	0.38976	0.164238	0.499309	0.433497	0.342451	0.229304	0	0	0.213413	0.2471	0.285853	0.352631	0.219951	0.431987	0	0.328341	0.0953538	0	0.121149
LINC01807	0.112465	0	0.0561975	0	0	0	0	0	0	0	0	0	0	0.0508555	0	0	0	0	0	0	0	0	0	0.137099	0	0	0	0.105298	0	0	0	0	0	0	0	0	0	0	0	0	0	0	0	0.125109	0	0	0.161246	0	0
AC012070.1	0	0	0	0	0	0	0	0	0	0	0	0	0	0	0	0	0	0	0	0	0	0	0	0	0	0	0	0	0	0	0	0	0	0	0	0	0	0	0	0	0	0	0	0	0	0	0	0	0
LINC01907	0	0	0.0416362	0.0890443	0.0538441	0	0	0.0500885	0	0	0.0391027	0	0.0299527	0.0420811	0	0	0.0508082	0	0	0	0	0.0731268	0	0	0	0.0464287	0.0406721	0.0585187	0	0	0.028215	0	0.0669142	0	0	0	0.0420575	0	0	0.036151	0	0	0.0409732	0.0230708	0.102924	0	0.0437526	0	0
SPATA3-AS1	0	0.0565523	0	0	0.0538441	0	0.0759626	0	0.138539	0	0.0391027	0.0661714	0.0368208	0	0	0.165961	0	0	0	0	0	0	0.122371	0.0293945	0	0.031098	0.0496398	0.0743268	0	0	0.0398842	0.0602366	0	0.0425379	0.0428617	0	0	0.0742301	0	0	0.0584458	0.035029	0	0.0230708	0	0.0976288	0.0362386	0	0.069478
AC017104.3	0	0.109872	0	0	0	0	0	0	0	0	0	0	0	0	0	0	0	0	0	0	0	0	0	0	0	0	0	0	0	0	0	0	0	0	0	0	0	0	0	0	0	0	0	0	0	0.113856	0	0	0
LINC00471	0.374185	0.15674	0.235958	0.378048	0.26839	0.264267	0.454969	0.419196	0.577125	0.303184	0.20052	0.12273	0.130873	0.152237	0.116056	0.244965	0.442427	0.135025	0.103339	0.446302	0.257293	0.178386	0.122371	0.176089	0.289635	0.0386052	0.294179	0.166069	0.170241	0.229304	0.200299	0.425567	0.245938	0.302008	0.222043	0	0.273856	0.167156	0.365575	0.440486	0.20901	0.504799	0.281781	0.228841	0.219716	0.15674	0.0704447	0	0.507726
AC068134.2	0	0	0	0	0	0	0	0	0	0	0.107146	0	0	0	0	0	0	0	0	0	0	0	0	0	0	0	0	0	0	0	0	0	0	0	0	0	0	0	0	0.0889081	0	0	0	0	0	0	0	0	0
AC006037.1	0	0	0	0	0	0	0	0	0	0	0	0	0	0	0	0	0	0	0	0	0	0	0	0	0	0	0	0	0	0	0	0	0	0	0	0	0	0	0	0	0	0	0	0	0	0	0	0	0
AC122134.1	0	0	0	0	0	0	0	0	0	0	0	0	0	0	0	0	0	0	0	0	0	0	0	0	0	0	0	0	0	0	0	0	0	0	0	0	0	0	0	0	0	0	0	0	0	0	0	0	0
AC097713.1	0	0	0	0	0	0	0	0	0	0	0	0	0	0	0	0	0	0	0	0	0	0	0	0	0	0	0	0	0	0	0	0	0	0	0	0	0	0	0	0	0	0	0	0	0	0	0	0	0
LINC01891	0	0	0	0	0	0	0	0	0	0	0	0	0	0	0	0	0	0	0	0	0	0	0	0	0	0	0	0	0	0	0	0	0	0	0	0	0	0	0	0	0	0	0	0	0	0	0	0	0
LINC01173	0	0	0	0	0	0	0	0	0	0	0	0	0	0	0	0	0	0	0	0	0	0	0	0	0	0	0	0	0	0	0	0	0	0	0	0	0	0	0	0	0	0	0	0	0	0	0	0	0
AC114814.1	0	0	0	0	0	0	0	0	0	0	0	0	0	0	0	0	0	0	0	0	0	0	0	0	0	0	0	0	0	0	0	0	0	0	0	0	0	0	0	0	0	0	0	0	0	0	0	0	0
AC114814.3	0	0	0	0	0	0	0	0	0	0	0	0	0	0	0	0	0	0	0	0	0	0	0	0	0	0	0	0	0	0	0	0	0	0	0	0	0	0	0	0	0	0	0	0	0	0	0	0	0
AC084030.1	0	0	0	0	0	0	0	0	0	0	0	0	0	0.0352676	0	0	0	0	0	0	0	0	0	0	0	0	0	0	0	0	0	0	0	0	0	0	0	0	0	0	0	0	0	0	0	0	0	0	0
AC107079.1	0.121548	0.15674	0	0.156897	0.117042	0	0	0	0	0	0.164238	0	0	0.0508555	0	0	0	0	0	0	0.0844284	0.1433	0	0.137099	0	0	0.0934571	0	0	0	0	0	0	0.0860821	0	0	0	0.242826	0.102299	0.0763144	0	0	0	0.0605955	0	0	0	0.114709	0
AC112721.1	0	0	0	0	0	0	0	0	0	0	0	0	0	0.0601399	0	0	0	0	0	0	0	0	0	0	0	0	0	0	0	0	0	0	0	0	0	0	0	0	0	0	0	0	0	0	0	0	0	0	0
AC112721.2	0	0	0	0	0	0	0	0	0	0	0	0	0	0	0	0	0	0	0	0	0	0	0	0	0	0.0973112	0	0	0	0	0	0	0	0	0	0	0	0	0	0	0	0	0	0	0	0	0	0	0
AC012485.2	0.246362	0.109872	0.260446	0.320776	0	0.152547	0	0.137369	0.206154	0	0.107146	0	0.26533	0	0	0.518051	0.218662	0.261164	0.0735347	0.152547	0.0990901	0.178386	0	0.0860821	0	0	0.118201	0	0	0.422032	0	0	0	0.208386	0.444027	0	0.126691	0.167156	0.213413	0.178386	0	0.28365	0	0.31908	0.219716	0.365575	0.111051	0	0.260191
LINC01107	0	0.0730557	0	0.0890443	0.0996802	0.08151	0	0.0874334	0	0	0	0.0929584	0	0.0258953	0.125818	0	0	0	0.0553528	0.0557975	0.038132	0.0731268	0	0.0333572	0.0479195	0	0.0496398	0	0	0.074768	0	0.0980296	0	0	0.0723851	0	0	0	0.0541223	0	0	0	0	0	0	0.0416868	0	0	0
AC145625.1	0	0	0	0	0	0	0	0	0	0	0	0	0	0	0	0	0	0	0	0	0	0	0.198802	0	0	0	0	0	0	0	0	0	0	0	0	0	0	0	0	0	0	0	0	0	0	0	0	0	0
LINC01940	0	0	0	0	0	0	0	0	0	0	0	0	0	0	0	0	0	0	0	0	0	0	0	0	0	0	0	0	0	0	0	0	0	0	0	0	0	0	0	0	0	0	0	0	0	0	0	0	0
AC079612.1	0	0	0	0	0	0	0	0	0	0	0	0	0	0	0	0	0	0	0	0	0	0	0	0	0	0	0	0	0	0	0	0	0	0	0	0	0	0	0	0	0	0	0	0	0	0	0	0	0
AC079612.2	0	0	0	0	0	0	0	0	0	0	0	0	0	0	0	0	0	0	0	0	0	0	0	0	0	0	0	0	0	0	0	0	0	0	0	0	0	0	0	0	0	0	0	0	0	0	0	0	0
AC093802.2	0	0	0	0	0	0	0	0	0	0	0	0	0	0	0	0	0	0	0	0	0	0	0	0	0	0	0	0	0	0	0	0	0	0	0	0	0	0	0	0	0	0	0	0	0	0	0	0	0
AC093802.1	0	0	0	0	0	0	0	0	0	0	0	0.0794373	0	0	0	0	0	0	0	0	0	0	0	0	0	0	0	0	0	0	0	0	0	0	0	0	0	0	0	0	0	0	0	0	0	0	0	0	0
AC124861.1	0	0.168112	0	0	0	0	0	0	0	0	0	0	0	0	0	0	0	0	0	0	0	0.271455	0.328341	0	0	0.154124	0	0.20092	0	0.188388	0	0	0.186089	0.302008	0.150114	0	0.469207	0.242826	0.326487	0.384458	0	0.160747	0.363498	0.243192	0	0.187343	0	0	0
AC011298.1	8.32585	11.693	6.30796	11.693	8.32585	7.90326	11.693	5.20259	3.67179	10.7559	8.32585	3.63119	5.95825	4.26934	9.3993	7.53393	9.3993	8.32585	8.32585	6.71068	8.80129	5.81952	4.20716	8.80129	6.30796	4.71706	6.9588	5.67411	9.3993	9.99946	6.30796	6.50407	9.99946	6.9588	4.99909	8.32585	10.7559	4.99909	8.32585	6.50407	9.3993	2.5993	3.10824	4.03586	7.21236	6.30796	5.54793	2.56815	4.63035
AC133528.1	0.958887	0.663265	0.387001	0.299172	0.325559	0.280533	0.724226	0.554821	0.620498	0.3164	0.0711879	0.618843	0.31835	0.356398	0.32676	0.152772	0.400725	0.349747	1.28956	0.242136	0.257293	0.216963	0.154765	0.0552087	0	0.274116	0.0824789	0.283117	0.156336	0	0.160551	0	0.280533	0.195362	0.12744	0.670491	0.197072	0.481778	0.381041	0.117218	0.115602	0.394804	0.21113	0.386174	0.698474	0.289323	0.0704447	0.281781	0.0941273
AC131097.4	0	0.190473	0.687938	0	0.137099	0	0	0.137369	0	0	0.667518	0	0.182234	0.269636	0.214781	0.127008	0.118352	0	0	0.259131	0	0.178386	0	0	0.238171	0.347049	0	0	0.44678	0.130446	0.168112	0	0.128965	0.0996802	0	0	0.219951	0.292212	0.213413	0	0	0	0.127008	0.072017	0	0.113856	0	0	0.244208
LINC01238	0.326158	0.480383	0.853676	0.546044	1.03767	0.977166	0.887458	0.0737704	0.237913	0.119319	0.5876	0.490544	0.416547	0.223807	0.353712	0.600012	0.935147	0.663265	0.066968	1.03767	0.184631	0.1433	0	0.42801	0.48928	0.347049	0.10493	0.612429	0.582737	0.509057	0.602581	0.284987	0.397183	0.289011	0.196669	0.21417	0.368002	0.242826	0.786723	0.481778	0.339926	0.591943	1.04934	0.441409	0.187894	0.717008	0.442427	0.46745	0.660335
LINC01880	0	0	0	0	0	0	0	0	0	0	0	0	0.102666	0	0	0	0	0	0	0	0	0	0	0.0860821	0	0	0	0	0	0	0	0	0	0	0	0	0	0	0	0.103693	0	0	0	0	0	0	0	0	0
LINC01986	0	0	0	0	0	0	0	0	0	0	0	0	0	0	0	0	0	0	0	0	0	0	0	0	0	0	0	0	0	0	0	0	0	0	0	0	0	0	0	0	0	0	0	0	0	0	0	0	0
AC066595.1	0	0	0	0	0	0	0	0	0	0	0	0	0	0	0	0	0	0	0	0	0	0	0	0	0	0	0	0	0	0	0	0	0	0	0	0	0	0	0	0	0	0	0	0	0	0	0	0	0
LINC01266	0.140425	0.0565523	0.0486975	0.099212	0.0996802	0.280533	0.117503	0.117308	0.0465857	0.179222	0.107146	0.0661714	0.0847062	0.0508555	0.157055	0.152772	0.0810574	0.0570073	0.0553528	0.0557975	0	0.0946503	0.111051	0.0552087	0.096952	0.274116	0.0824789	0.0585187	0.0771978	0.0625547	0.0790515	0.114581	0.107684	0.0860821	0.254979	0.248543	0.126691	0.087163	0.0647148	0.0889081	0.0584458	0.0886302	0.0754249	0.0425379	0.117308	0.0976288	0.0953538	0.125263	0.0811566
AC090044.1	0	0.331093	0.0996123	0	0.2825	0.871436	0.338172	0.607818	0.129639	0.425956	0.137099	0	0.215476	0.341396	0.847201	0.707402	0.554821	0.169467	0.174368	0.310169	0	0.216963	0	0.599313	0.536664	0.32676	0.148781	0.643107	0	0.509057	0.112134	0.918509	0.821721	0.440486	1.40534	0.493177	0.264267	0	0	0	0.20901	0.233204	0	0.0958273	0.252022	0.570994	0.250763	0	0.552898
AC087430.1	0	0.0327141	0	0	0	0	0	0	0	0	0	0	0	0	0	0	0	0	0.0415507	0	0	0	0	0	0	0	0	0	0	0	0	0	0	0	0	0	0	0	0	0	0	0	0	0	0	0	0	0	0
CNTN4-AS2	0	0	0	0	0.207007	0	0	0	0	0	0	0	0	0	0	0	0	0	0	0	0	0	0.328341	0	0	0	0	0	0	0	0	0	0	0	0	0	0	0	0	0	0	0	0	0	0	0	0	0	0
AC034195.1	0	0	0	0	0	0	0	0	0	0	0	0	0	0	0	0	0.104088	0	0	0	0	0	0	0	0	0	0	0	0	0	0	0	0	0	0	0.185946	0	0	0.0881516	0	0	0	0	0	0	0	0	0.139558	0
EGOT	0.440026	0.463881	0.418347	0.673193	0.310169	0.228138	0.271674	0.302863	0.179964	0.179222	0.570994	0.693786	0.169573	0.746147	0.747172	0.505417	0.412059	0.31441	0.776173	0.0976288	0.374976	0.301715	1.30612	0.419196	0.413824	2.7678	0.540795	0.673193	0.487285	0.312462	0.0790515	0.256083	0.389041	0.989509	0.516786	0.372761	0.208618	0.361216	0.381041	0.740638	0.585765	0.256343	0.591134	0.546658	0.465841	0.634585	0.442427	0.396444	0.382717
AC087857.1	0	0	0	0	0	0.207007	0	0.170837	0	0.26839	0	0	0.130873	0	0	0	0	0	0	0	0	0	0	0	0	0	0.16439	0	0	0	0	0	0	0.139698	0	0	0	0	0	0	0	0	0	0	0	0	0	0	0
AC026167.1	0	0	0	0	0.395289	0.793833	0	0	0	0	0	0	0	0	0	0	0	0	0	0	0	0	0	0.257865	0.401715	0	0.382237	0	0	0	0	0	0	0.78911	0	0	0	0	0.629741	0	0	0	0	0	0	0	0	0	0
AC069277.1	0	0	0	0	0.190473	0	0.100033	0.286559	0	0	0.623634	0	0	0	0	0	0.472661	0	0	0.259131	0	0	0	1.10079	0	0.125759	0.148781	0.0743268	0	0	0	0	0.0765726	0.127692	0.353331	0	0	0	0	0	0.096723	0	0.104088	0	0	0.052235	0.138884	0	0
GRM7-AS3	0	0.0639811	0.0416362	0	0	0	0.108051	0.257865	0	0	0	0.192026	0	0	0	0.0799794	0	0.0844284	0	0	0	0	0	0	0	0.125759	0.16439	0	0.182563	0.156538	0	0	0	0	0	0	0	0	0	0	0.166878	0	0	0	0	0	0	0	0.0811566
AC018832.1	0	0	0	0	0	0	0	0	0	0	0	0	0	0	0	0	0	0	0	0	0	0	0	0	0	0	0	0	0	0	0	0	0	0	0	0	0	0	0	0	0	0	0	0	0	0	0	0	0.139955
AC034187.1	0	0	0	0	0	0	0	0	0	0	0	0	0	0	0	0	0	0	0	0	0	0	0	0	0	0	0	0	0	0	0	0	0	0	0	0	0	0	0	0	0	0	0	0	0	0	0	0	0
SRGAP3-AS4	0	0	0	0	0	0	0	0	0.197508	0	0	0	0	0	0	0.42715	0	0	0.113712	0	0	0	0	0	0	0	0	0	0	0	0.175923	0	0	0	0	0	0	0	0	0.190961	0	0	0	0.149118	0	0	0	0	0.260191
AC022007.1	0.3096	0.512945	1.25501	0.728273	0.425567	0.734412	0.938241	0.71909	1.35035	0.687021	0.749235	0.954231	0.954231	0.917047	0.86603	0.993036	0.713166	0.991272	1.24197	0.756933	0.973613	0.49647	0.43958	0.973613	0.473486	1.1435	1.17789	1.1156	0.798692	0.599313	0.580789	0.696544	0.989509	0.899289	0.807006	0.832366	0.893261	0.670491	1.01907	0.847201	0.86603	1.45018	0.723248	1.35647	1.27309	0.95109	0.816785	0.433497	0.679444
LINC00606	0	0	0	0	0	0	0	0	0	0	0	0	0	0	0	0	0	0	0	0	0	0	0	0	0	0	0	0	0	0	0	0	0	0	0	0	0	0	0	0	0	0	0	0	0	0	0	0	0
AC018495.1	0	0	0	0	0	0	0	0	0	0	0	0	0	0	0	0	0	0	0	0	0	0	0	0	0	0	0	0	0	0	0	0	0	0	0	0	0	0	0	0	0	0	0	0	0	0	0	0	0
LINC02022	0	0	0	0	0	0	0	0	0	0	0	0	0	0	0	0	0	0	0	0	0	0	0	0	0	0	0	0	0	0	0	0	0	0	0	0	0	0	0	0	0	0	0	0	0	0	0	0	0
AC093496.1	0	0	0	0	0	0	0	0	0	0	0	0	0	0	0	0	0	0	0	0	0	0	0	0	0	0	0	0	0	0	0	0	0	0	0	0	0	0	0	0	0	0	0	0	0	0	0	0	0
LINC01267	0.0580408	0	0	0	0	0	0	0	0	0	0	0	0	0.0352676	0	0	0	0	0.0383504	0.0703533	0.038132	0	0	0	0.0601399	0.031098	0	0	0	0	0	0.0675734	0	0	0	0	0.0420575	0.0996123	0	0.0544015	0.0665708	0	0	0	0	0	0	0	0.0461531
LINC02011	0	0	0	0	0	0	0	0	0	0	0	0	0	0	0	0	0	0	0	0	0	0	0	0	0	0	0	0	0	0	0	0	0	0	0	0	0	0	0	0	0	0	0	0	0	0	0	0	0
AC010139.1	0	0	0	0	0	0	0	0	0	0	0	0	0	0	0	0	0	0	0	0	0	0	0	0	0	0	0	0	0	0	0	0	0	0	0	0	0	0	0	0	0	0	0	0	0	0	0	0	0
LINC00690	0	0	0	0	0	0	0	0	0	0	0	0	0	0	0	0	0	0	0	0	0	0	0	0	0	0	0	0	0	0	0	0	0	0	0	0	0	0	0	0	0	0	0	0	0	0	0	0	0
AC091493.1	0	0	0	0	0	0	0	0	0	0	0	0	0	0	0	0	0	0	0	0	0	0	0	0	0	0	0	0	0	0	0	0	0	0	0	0	0	0	0	0	0	0	0	0	0	0	0	0	0
AC132807.2	0	0	0	0	0	0	0	0	0	0	0	0	0	0	0	0	0	0	0	0	0	0	0	0	0	0	0	0	0	0	0	0	0	0.289011	0	0	0	0	0	0	0	0	0	0	0	0	0	0	0
AC116096.1	0.0580408	0	0.026965	0	0.0699922	0	0	0	0.0465857	0	0.0502059	0.10704	0.0368208	0	0.0985749	0	0.0698812	0	0.145026	0	0	0	0	0	0	0	0.0406721	0	0.0771978	0.0502553	0	0.0675734	0	0.0349649	0.0353593	0.119758	0.0621069	0	0.0428617	0	0	0.035029	0.049917	0	0	0	0	0	0
ZNF385D-AS2	0	0	0	0	0	0	0	0	0	0	0	0	0	0	0	0	0	0	0	0	0	0	0	0	0	0	0	0	0	0	0	0	0	0	0	0	0	0	0	0	0	0	0	0	0	0	0	0	0
AC092422.1	0	0	0	0	0	0	0	0	0	0	0	0	0	0	0	0	0	0	0	0	0	0	0	0	0	0	0	0	0	0	0	0	0	0	0	0	0	0	0	0	0	0	0	0	0	0	0	0	0
AC099754.1	0	0	0	0	0	0	0	0	0	0	0	0	0	0	0	0	0	0	0	0	0	0	0	0	0	0	0	0	0	0	0	0	0	0	0	0	0	0	0	0	0	0	0	0	0	0	0	0	0
LINC02084	0.170979	0.315768	0.0643588	0	0	0.136828	0	0	0.0994543	0.168112	0	0.0929584	0.0699922	0.126691	0	0	0.0605955	0.0756927	0.213413	0	0	0	0	0.108409	0.108513	0.0464287	0	0.20092	0	0.156538	0.0790515	0.0980296	0	0.127692	0.0842421	0	0.0621069	0	0.148561	0	0.134888	0	0	0.170445	0.129713	0.052235	0.0824789	0.0816648	0.169185
LINC01980	0	0	0	0	0	0	0.19477	0	0	0	0	0	0	0	0	0	0	0	0	0	0	0	0	0	0.325289	0	0	0	0	0	0	0	0	0	0	0	0	0	0	0	0	0	0	0.201231	0	0	0.522433	0	0
LINC01985	0.198802	0.168112	0.31908	0	0	0	0.223237	0.347746	0.159497	0	1.04735	0	0.26533	0.223807	0.517346	0	0.678689	0	0.257293	0.207007	0.447449	0	0.544729	0.12744	0.188935	0.274116	0	0.498243	0.208851	0	0	0	0.343722	0.289011	0.150114	0	0.186224	0.421013	0.470284	0.142766	0.255492	0.160747	0	0.243192	0	0.542698	0.406178	0	0.201814
AC116035.1	0	0	0	0	0	0	0	0	0	0	0	0	0	0	0	0	0	0	0	0	0	0	0	0	0	0	0.148781	0	0	0	0	0	0	0	0	0	0	0	0	0	0	0	0	0	0	0	0	0	0
LINC01811	0	0	0	0	0	0	0	0	0	0	0	0	0	0	0	0	0	0	0	0	0	0	0	0	0	0	0	0	0	0	0	0	0	0	0	0	0	0	0	0	0	0	0	0	0	0	0	0	0
AC123023.1	0	0	0	0	0	0	0	0	0	0	0	0	0	0	0	0	0	0	0	0	0	0	0	0.0860821	0	0	0	0	0	0	0	0	0	0	0	0	0	0	0	0	0	0	0	0	0	0	0	0	0
AC018359.1	0	0	0	0	0	0	0	0	0	0	0	0	0	0	0	0	0	0	0	0	0	0	0	0	0	0	0	0	0	0	0	0	0	0	0	0	0	0	0	0	0	0	0	0	0	0	0	0	0
AC097359.3	0.112465	0.0489065	0.0353593	0.108305	0.0699922	0	0.0922865	0.0618092	0.056587	0.157055	0	0.0929584	0.0368208	0.0300284	0	0.13929	0	0	0.257293	0.0840091	0	0.0946503	0	0	0	0	0	0.0658188	0	0	0.100939	0	0	0	0.0723851	0	0.0621069	0	0	0.0451138	0	0	0.0595464	0.0308068	0	0	0	0	0
AC122683.1	0	0	0	0	0	0	0	0	0	0	0.0831862	0	0	0	0	0	0	0	0	0	0	0	0	0.064504	0.172296	0	0	0	0	0	0	0	0	0	0	0	0	0	0	0	0	0.0763144	0	0	0	0	0	0	0
AC099560.1	0	0	0	0	0	0	0	0	0	0	0	0	0	0	0	0	0	0	0	0	0	0	0	0	0	0	0	0	0	0	0	0	0	0	0	0	0	0	0	0	0	0	0	0	0	0	0	0	0
AC099541.1	0	0	0	0	0	0	0	0	0	0	0	0	0	0	0	0	0	0	0.128965	0	0	0	0	0	0	0	0	0	0	0	0	0	0	0	0	0	0	0	0	0	0	0	0	0	0	0	0	0	0
AC009743.1	0	0	0	0	0	0	0	0	0	0	0	0	0	0	0	0	0	0	0	0	0	0	0	0	0	0	0	0	0	0	0	0	0	0	0	0	0	0	0	0	0	0	0	0	0	0	0	0	0
AC092042.1	0	0	0	0.520622	0.26839	0	0	0.156336	0	0	0.137099	0.192026	0.117983	0.178919	0.243884	0.277149	0.348365	0	0	0	0	0	0.250253	0.108409	0.289635	0.112899	0.148781	0	0	0	0.112134	0	0.280533	0.127692	0.12744	0	0	0.19968	0.132626	0.117218	0.196926	0.116056	0	0.0958273	0.238171	0	0	0	0.155681
AC006055.1	0	0	0	0	0	0	0	0	0	0	0	0	0	0	0	0	0	0	0	0	0	0	0	0	0	0	0	0	0	0	0	0	0	0	0	0	0	0	0	0	0	0	0	0	0	0	0	0	0
AC006058.2	0	0	0	0	0	0	0	0	0	0	0	0	0	0	0	0	0	0	0	0	0	0	0	0	0	0	0	0	0	0	0	0	0	0	0	0	0	0	0	0	0	0	0	0	0	0	0	0	0
AC006058.3	0	0	0	0	0	0	0	0	0	0	0	0	0	0	0	0	0	0	0	0	0	0	0	0	0	0	0	0	0.0863952	0.074768	0	0	0.117405	0	0.0521681	0	0	0	0	0	0	0	0	0	0	0	0.0953538	0	0
AC006058.1	0.0580408	0.168112	0.0561975	0.378048	0.156224	0.107146	0.0922865	0.170837	0.064601	0.214781	0.122224	0.252474	0.169573	0.0508555	0.147045	0.152772	0.0413799	0.276623	0.159712	0.187894	0.198288	0.233204	0.264915	0.333465	0.096952	0.691781	0.0824789	0.0971508	0.105873	0.145026	0.0398842	0.0896522	0.0669142	0.195362	0.182921	0.19968	0.102299	0.110616	0.213413	0.128965	0.220691	0.0886302	0.163601	0.125109	0.129713	0.300474	0.151652	0.0695902	0.0570073
AC124045.1	0.525428	0.749235	0.25397	0.673193	0.713166	1.20625	0.700411	0.918509	0.541391	0.476717	1.2368	0.943058	0.698474	0.642346	0.609427	0.468049	0.657701	0.62636	0.213413	0.70552	0.631421	0.908028	0.776173	0.82037	0.912229	0.610906	0.776173	0.742685	1.00815	0.570994	0.784316	0.726227	0.998058	0.449354	0.651462	0.684251	0.571869	0.331093	0.629741	0.957345	0.7151	0.798692	0.558097	0.76624	0.481333	0.698474	0.473486	0.814423	0.835098
AC141002.1	0	0.424418	0.344317	0.561816	0	0	0	0	0	0	0.459662	0	0	0	0	0	0	0	0	0.433497	0.320776	0	0	0.290646	0	0	0.443504	0.434018	0.551606	0	0.602581	0	0	0	0	0	0	1.00293	0	0	0	0	0	0	0	0.817936	0	0.425177	0
AC121247.1	0	0.0489065	0.0353593	0	0	0	0	0.137369	0.0899951	0.11133	0	0	0.145262	0	0	0	0.0605955	0.105125	0.0944701	0	0	0	0	0.185666	0.096952	0.195162	0	0	0.105873	0.0625547	0.0699367	0	0	0.114837	0.0723851	0	0	0	0.0647148	0.128965	0.125699	0.0523496	0.0595464	0.0958273	0.129713	0.129128	0.0824789	0.114709	0
BSN-DT	0.209373	0.0639811	0.153165	0.135816	0.237913	0.152547	0.231982	0.101316	0.331393	0.201363	0.107146	0.252474	0.102666	0.115138	0.107398	0.101116	0.295672	0.181273	0.217788	0.130873	0.0990901	0.0731268	0.122371	0.108409	0.0601399	0.140425	0.133364	0.236106	0.105873	0.0877553	0.160551	0.243376	0.0765726	0.254765	0.353331	0.172296	0.252474	0.275689	0.25397	0.117218	0.3096	0.28365	0.140425	0.140733	0.117308	0.0632845	0.237516	0.0695902	0.121149
AC096920.1	0	0	0	0	0	0	0	0	0	0	0	0	0	0	0	0	0	0	0	0	0	0	0	0	0	0	0	0	0	0	0	0	0	0	0	0	0	0	0	0	0	0	0	0	0	0	0	0	0
LINC02019	1.42102	0.832366	1.05334	0.851043	0.987799	0.943058	1.14124	1.75349	1.01712	0.847201	0.978991	1.41517	0.82587	0.62124	2.2247	0.673193	1.57197	0.860899	1.74412	1.31408	1.57582	1.05132	0.884523	0.791551	1.02985	0.796144	0.897857	0.960524	0.935147	1.01533	1.19683	0.747172	1.71646	0.505417	0.551606	1.29467	0.487786	0.438092	0.701427	0.707402	0.778503	0.577125	0.883043	0.583516	0.856309	1.21082	0.717008	0.541391	0.218791
AC092059.1	0	0	0	0	0	0	0	0	0	0	0	0	0	0	0	0	0	0	0	0	0	0	0	0	0	0	0	0	0	0	0	0	0	0	0	0	0	0	0	0	0	0	0	0	0	0	0	0	0
LINC02017	0	0	0	0	0	0	0	0	0	0	0	0	0	0	0	0	0	0	0	0	0	0	0	0	0	0	0	0	0	0	0	0	0	0	0	0	0	0	0	0	0	0	0	0	0	0	0	0	0.169185
LINC02030	0	0	0.0303587	0	0	0	0	0	0	0	0	0	0.0558893	0	0	0	0	0	0	0	0	0	0	0	0	0	0	0	0	0	0.0328534	0.0789544	0	0	0	0.133206	0	0	0	0	0	0	0	0	0	0.0416868	0	0	0.0570073
AC121764.2	0	0	0	0	0	0	0	0	0	0	0	0	0	0	0	0	0	0	0	0	0	0	0	0	0	0	0	0	0	0	0	0	0	0	0	0	0	0	0	0	0	0	0	0	0	0	0	0	0
AC121764.3	0	0	0	0	0	0	0	0	0	0	0	0	0	0	0	0	0	0	0	0	0	0	0	0	0	0	0	0	0	0	0	0	0	0	0	0	0	0	0	0	0	0	0	0	0	0	0	0	0
AC121764.1	0	0	0	0	0	0	0	0	0	0	0	0	0.102666	0	0	0	0	0	0	0	0	0	0	0	0	0.0973112	0	0	0	0	0	0.30865	0.233656	0	0	0	0	0	0	0.103693	0	0.101474	0	0	0	0	0	0	0
AC025572.1	0	0	0	0	0	0	0	0	0	0	0	0	0	0	0	0	0	0	0	0	0	0	0	0	0	0	0	0	0	0	0	0	0	0	0	0	0	0	0	0	0	0	0	0	0	0	0	0	0
DENND6A-DT	0	0	0	0	0	0	0	0	0	0	0.0391027	0	0	0	0	0	0	0	0	0	0	0	0	0	0	0	0	0.0504427	0.0544015	0	0	0	0	0.0349649	0	0	0	0	0	0.036151	0	0	0	0	0	0	0	0	0
AC098479.1	0	0	0	0	0	0	0	0	0	0	0	2.10893	0	0	0	0	0	0	0	0	0	0	0	0	0	0	2.58798	0	3.31792	0	0	0	2.40914	0	0	0	0	0	0	0	0	0	0	0	0	0	0	0	0
AC116036.2	0	0.266534	0.432482	0.411052	0.310169	0	0	0.319829	0.148781	0.26839	0.405839	0.666758	0	0.209771	0	0.305903	0.512306	0.181273	0.480858	0.342451	0	0.233204	0	0.216963	0.458598	0	0.181119	0	0	0.560328	0	0.554821	0.172496	0.264915	0.474901	0	0.161473	0.550162	0.555986	0.526036	0.23264	0.145484	0.173244	0.115371	0.267469	0	0.484975	0	0.185432
AC114400.1	0	0	0	0	0	0	0	0	0	0	0	0	0	0	0	0	0	0	0	0	0	0	0	0	0	0	0	0	0	0	0	0	0	0	0	0	0	0	0	0	0	0	0	0	0	0	0	0	0
AC138057.1	0	0	0	0	0	0	0	0	0	0	0	0	0	0	0	0	0	0	0	0	0	0	0	0	0	0	0	0	0	0	0	0	0	0	0	0	0	0	0	0	0	0	0	0	0	0	0	0	0
AC126121.2	0	0	0	0	0	0	0	0	0	0	0	0	0	0	0	0	0	0	0	0	0	0	0	0	0	0	0	0	0	0	0	0	0	0	0	0	0	0	0	0	0	0	0	0	0	0	0	0	0
LINC00698	0	0	0	0	0	0	0	0	0.056587	0	0.0831862	0	0	0	0	0.0614331	0	0	0	0	0	0	0	0	0	0	0.0824789	0	0.0771978	0	0	0	0	0	0.0723851	0	0.0508555	0	0.0541223	0.0451138	0.0768486	0	0	0.0844284	0	0	0	0	0
LINC00994	0.112465	0	0.0353593	0.0890443	0.0538441	0.08151	0.135988	0.0500885	0	0.0935807	0.0391027	0.0661714	0.0299527	0.115138	0	0	0.0605955	0.0570073	0.0735347	0.0840091	0.038132	0	0	0.0401039	0.157959	0.0566978	0.0496398	0.0658188	0	0.0502553	0.052302	0	0	0.0349649	0	0	0.0508555	0.087163	0.0647148	0	0.0665708	0.0886302	0.0754249	0.0605955	0.102924	0	0.0521215	0.155008	0
AC096888.1	0	0	0	0	0	0	0	0	0	0	0	0	0	0	0	0	0	0	0	0	0	0	0	0	0	0	0	0	0	0	0	0	0	0	0	0	0	0	0	0	0	0	0	0	0	0	0	0	0
LINC02040	0	0	0	0	0	0	0	0	0	0	0	0	0	0	0	0	0	0	0	0	0	0	0	0	0	0	0	0	0	0	0	0	0	0	0	0	0	0	0	0	0	0	0	0	0	0	0	0	0
AC114401.1	0	0	0.0303587	0.0890443	0	0	0	0	0	0	0	0	0	0	0	0	0	0	0	0	0	0	0	0	0	0	0	0	0	0	0	0	0	0	0	0	0	0	0	0	0	0	0	0	0.219716	0	0	0	0
AC099328.2	0	0	0	0	0	0	0	0	0	0	0	0	0	0	0	0	0	0	0	0	0	0	0	0	0	0	0	0	0	0	0	0	0	0	0	0	0	0	0	0	0	0	0	0	0	0	0	0	0
AC104445.1	0	0	0	0	0	0	0	0	0	0	0	0	0	0	0	0	0	0	0	0	0	0	0	0	0	0	0	0	0	0	0	0	0	0	0	0	0	0	0	0	0	0	0	0	0	0	0	0	0
SAMMSON	0	0	0	0	0	0	0	0	0	0	0	0	0	0	0	0	0	0	0	0	0	0	0	0	0	0	0	0	0	0	0	0.0675734	0	0	0.115181	0	0	0	0	0.036151	0	0	0	0	0	0.052235	0	0.0695902	0.0570073
AC097634.1	0.363874	0.245663	0.231486	0	0.253687	0.107146	0.38741	0.170837	0.109161	0.146148	0.150203	0.402151	0.31835	0.43648	0.371497	0.13929	0.155547	0.250508	0.203494	0.0557975	0.219437	0.105362	0.175566	0.185666	0.123	0.140425	0.215476	0.301421	0.0863952	0.171299	0.330421	0.0896522	0.128965	0.195362	0.233039	0.3894	0.283386	0.521828	0.17368	0.142766	0.196926	0.495852	0.256602	0.0605955	0.187894	0.052235	0.138884	0.281781	0.0941273
LINC00877	0.151365	0.0565523	0.171898	0.135816	0.0996802	0.188935	0.100033	0	0.056587	0.179222	0.0831862	0.285853	0.369156	0.186602	0.19968	0.0528177	0.0810574	0.0942899	0.0735347	0.207007	0.482224	0.512945	0	0.226969	0.0601399	0.288384	0.10493	0.187894	0.0771978	0.102015	0.160551	0.105873	0	0.243559	0.0617796	0	0.0916209	0.087163	0.116386	0.0889081	0.266272	0.434966	0.397986	0.816785	0	0.0337191	0.197508	0.272207	0.201814
AC105265.3	0	0	0	0	0	0	0	0	0	0	0	0	0	0	0	0	0	0	0	0	0	0	0	0	0	0	0	0	0	0	0	0	0	0	0	0	0	0	0	0	0	0	0	0	0	0	0	0	0
AC105265.4	0	0	0.267194	0	0	0	0	0	0	0	0	0	0	0	0	0	0	0	0	0	0	0	0	0	0	0	0	0	0	0	0	0	0	0	0	0	0	0	0	0	0	0	0	0	0	0	0	0	0
LINC00870	0.0580408	0.0489065	0.0907908	0	0.0538441	0.188935	0	0	0.0813551	0.119319	0.0391027	0	0	0.115138	0.0985749	0.0699367	0.0413799	0.0756927	0.0415507	0.0703533	0.0498668	0.0946503	0	0.0983859	0.0841812	0.355765	0.0406721	0.0504427	0.0660083	0.0502553	0.0790515	0.0675734	0	0	0.182921	0.119758	0.113783	0	0.0881516	0.0653709	0.125699	0.172695	0.0754249	0.0605955	0.117308	0.0632845	0.0521215	0	0.121149
AC112219.2	0	0.119887	0	0	0	0	0	0	0	0	0	0	0	0.0826448	0.394804	0	0	0	0	0	0	0	0	0	0	0.0973112	0.133364	0	0.156336	0.145026	0.100939	0	0	0	0	0	0	0.3164	0	0	0.182749	0.394804	0	0	0	0.129128	0	0	0.155681
AC112219.1	0	0	0	0	0	0	0	0	0	0	0	0	0	0	0	0	0	0	0	0	0	0	0	0	0	0	0	0	0	0	0	0	0.0765726	0	0	0	0	0	0	0	0	0	0	0	0	0	0	0	0
AC134508.1	0	0	0	0	0	0	0	0	0	0	0	0	0	0	0	0	0	0	0	0	0	0	0	0	0	0	0	0	0	0	0	0	0	0	0	0	0	0	0	0	0	0	0	0	0	0	0	0	0
AC104435.2	0	0	0	0	0	0.107146	0	0	0	0	0	0.10704	0.0558893	0	0	0	0	0	0	0	0	0	0	0	0	0	0.0824789	0	0	0	0	0.105873	0	0	0	0	0	0	0	0	0	0	0	0	0	0	0	0	0
LINC02005	0	0	0	0	0	0	0	0	0	0	0	0	0	0	0	0	0	0	0	0	0	0	0	0	0	0	0.228841	0	0	0	0	0	0	0	0	0	0	0	0	0.0653709	0	0	0	0	0	0	0	0	0
LINC02047	0	0	0	0	0	0	0	0	0	0	0	0	0	0	0	0	0	0	0	0	0	0	0	0	0	0	0	0	0	0	0	0	0	0	0	0	0	0	0	0	0	0	0	0	0	0	0	0	0
LINC02018	0.634585	0.412059	0.224267	0	0.596339	0.08151	0.135988	0.286559	0.237913	0.514117	0.0502059	0.618843	0.34402	0.522433	0	0.305903	0.600711	0.487285	0.602581	0.0703533	0.274375	0.178386	0.302863	0.0401039	0.123	0.314154	0.284526	0.416547	0	0.171299	0.347049	0.243376	0.172496	0.397986	0	0.185946	0	0.259131	0.19989	0	0.23264	0.0763144	0.874687	0.327033	0.641585	0	0.170979	0.186895	0.0941273
LINC00960	2.16443	1.86554	0.925756	1.20625	1.33907	2.04377	1.5836	3.27929	2.2247	3.07546	0.644778	1.79572	0.744918	2.0699	1.86064	2.27929	1.85085	0.860899	0.547393	2.67559	1.63601	2.48698	1.77646	1.2577	2.12151	2.3657	2.20801	3.67179	1.59545	1.52382	2.0084	1.0592	1.66612	1.19683	1.88564	2.06317	0.755853	2.25411	0.458598	0.963809	2.17857	0.743689	1.37742	2.81909	0.641585	1.00992	3.31792	1.87561	2.25411
AC117462.1	0	0	0	0	0	0	0	0	0	0	0	0	0	0	0	0	0	0	0	0	0	0	0	0	0	0	0	0	0	0	0	0	0	0	0	0	0	0	0	0	0	0	0	0	0	0	0	0	0
AC108752.1	0	0	0	0	0	0	0	0	0	0	0.492711	0	0	0.0826448	0.229831	0	0	0	0	0.152547	0	0	0	0	0.25426	0	0.133364	0	0	0	0	0.164238	0	0	0	0	0	0	0	0	0.395289	0	0	0.191846	0	0.129128	0	0.139558	0
AC068756.1	0	0	0	0	0	0	0	0.214589	0	0	0	0	0	0	0	0	0	0	0	0.225009	0	0	0	0	0	0	0	0	0	0	0	0	0	0	0	0	0	0	0	0	0	0	0	0	0	0	0	0	0
LINC02050	0	0	0	0	0	0.121716	0	0.101316	0	0	0.0831862	0	0	0.104405	0	0	0	0	0	0.113929	0	0	0	0	0	0	0	0	0	0	0	0	0	0.0734772	0	0	0	0	0	0	0	0	0	0	0	0.0844284	0	0	0
LINC02027	0	0	0	0	0	0	0	0	0	0	0	0	0	0	0	0	0	0	0	0	0	0	0	0	0	0	0	0	0	0	0	0	0	0	0	0	0	0	0	0	0	0	0	0	0	0	0	0	0
AC099542.2	0	0	0	0	0	0	0	0	0	0	0	0	0	0	0	0	0	0	0	0	0	0	0	0	0	0	0	0	0	0	0	0	0	0	0	0	0	0	0	0	0	0	0	0	0	0	0	0	0
AC099542.1	0	0	0.0643588	0	0.0841812	0	0.100033	0	0	0	0.0947576	0	0.203494	0	0	0.114224	0	0	0	0	0	0	0	0.046865	0	0.0464287	0	0.0743268	0.0863952	0.115687	0.0455534	0.0980296	0	0.0515669	0.0521681	0	0	0	0.116386	0	0	0	0	0.036151	0	0	0	0	0.0811566
AC129807.1	0	0	0	0	0	0	0	0	0	0	0	0	0	0	0	0	0	0	0	0	0	0	0	0	0	0	0	0	0	0	0	0	0	0	0	0	0	0	0	0	0	0	0	0	0	0	0	0	0
LINC02008	0	0	0	0	0	0	0	0	0	0	0	0	0	0	0	0	0	0	0	0	0	0	0	0	0	0	0	0	0	0	0	0	0	0	0	0	0	0	0	0	0	0	0	0	0	0	0	0	0
LINC00971	0	0	0	0	0	0	0	0	0	0	0	0	0	0	0	0	0	0	0	0	0	0	0	0	0	0	0	0	0	0	0	0	0	0	0	0	0	0	0	0	0	0	0	0	0	0	0	0	0
LINC02025	0	0	0	0	0	0	0	0	0	0	0	0	0	0	0	0	0	0	0	0	0	0	0	0	0	0	0	0	0	0	0	0	0	0	0	0	0	0	0	0	0	0	0	0	0	0	0	0	0
LINC02070	0	0	0	0	0	0	0	0	0	0	0	0	0	0	0	0	0	0	0	0	0	0	0	0	0	0	0	0	0	0	0	0	0	0	0	0	0	0	0	0	0	0	0	0	0	0	0	0	0
LINC00879	0	0	0	0	0	0	0	0	0	0	0	0	0	0	0	0	0	0	0	0	0	0	0	0	0	0	0	0	0	0	0	0	0	0	0	0	0	0	0	0	0	0	0	0	0	0	0	0	0
AC110491.1	0	0.0395809	0.196926	0.0890443	0.0538441	0	0	0.0500885	0.0465857	0	0	0	0	0.0258953	0	0	0.0925858	0.0570073	0.141979	0.0557975	0	0.0731268	0	0.0401039	0	0.112899	0	0	0	0	0.0328534	0	0.0765726	0.0515669	0	0.119758	0.0508555	0	0.0428617	0	0	0.0429953	0.049917	0	0.102924	0.0416868	0.0521215	0	0.0570073
AC117473.1	0	0	0	0	0	0	0	0	0	0	0	0	0	0	0	0	0	0	0	0	0	0	0	0	0	0	0	0	0	0	0	0	0	0	0	0	0	0	0	0	0	0	0	0	0	0	0	0	0
AC078828.1	0	0	0	0	0	0	0	0	0	0	0	0	0	0	0	0	0	0	0	0	0	0	0	0	0	0	0	0	0	0	0	0	0	0	0	0	0	0	0	0	0	0	0	0	0	0	0	0	0
AC107029.1	0	0	0	0	0	0	0	0	0	0	0	0	0	0	0	0	0	0.181273	0	0	0	0	0	0	0	0	0	0	0	0	0	0	0	0	0	0	0	0	0	0	0	0	0	0	0	0	0	0	0
AC107029.2	0	0	0	0	0	0	0	0	0	0	0	0	0	0	0	0	0	0	0	0	0	0	0	0	0	0	0	0	0	0	0	0	0	0	0	0	0	0	0	0	0	0	0	0	0	0	0	0	0
AC069222.1	0.266534	0.0996123	0.160052	0.0798836	0.156224	0.08151	0.417036	0.117308	0.446302	0.168112	0.137099	0.211772	0.0699922	0.223807	0.147045	0.114224	0.282152	0.0942899	0.294179	0.0557975	0.0498668	0.0631919	0.0895155	0.117879	0.0721797	0.0566978	0.0607777	0.146309	0.0863952	0.0877553	0.322057	0.114581	0.0669142	0.0615802	0.0521681	0.107563	0.0508555	0.184948	0.186481	0.0451138	0.144911	0.145484	0.163601	0.072017	0.153667	0.052235	0.0953538	0.139558	0.069478
AC106712.1	0.0580408	0	0.0303587	0	0	0	0	0	0	0	0	0	0.0299527	0	0	0	0	0	0	0	0	0	0	0	0	0	0.0496398	0	0	0	0	0.0980296	0	0	0	0	0.0508555	0	0	0	0	0	0	0	0	0	0	0	0.0570073
AC108748.1	0	0	0.0907908	0	0	0	0	0	0	0	0	0	0	0	0	0	0	0	0	0	0	0	0	0	0.141664	0	0	0	0	0	0	0	0	0	0	0	0	0	0	0	0	0	0	0	0	0	0	0	0
LINC00882	0.225009	0.0825679	0.171898	0.180173	0.0538441	0.188935	0.144781	0	0.138539	0.397183	0	0.32676	0.416547	0.269636	0.258128	0.0699367	0.462889	0.147819	0.124799	0.418765	0.0990901	0.271455	0.144026	0.226969	0.339495	0.274116	0.193661	0.408389	0.328028	0.548797	0.355404	0.243376	0.568656	0.302008	0.182921	0.480383	0.138884	0.438092	0.17368	0.103693	0.952659	0.130815	0	0.170445	0.285304	0.129128	0.197508	0.331694	0.0941273
DUBR	0.694661	0.851043	0.653543	0.478325	0.666758	0.543364	0.599313	0.519388	0.695536	0.388633	0.644778	0.252474	0.381855	0.684251	0.534811	0.416059	0.564612	0.237715	0.642346	0.207007	0.320776	0.693786	0.264915	0.455492	0.458598	0.488533	0.480383	0.819153	0.241908	0.343722	0.532361	0.761679	0.460164	0.397986	0.444027	0.372761	0.479781	0.591134	0.365575	0.377232	0.514588	0.369929	0.397986	0.645668	0.713166	0.61793	0.250763	0.602581	0.429875
AC063944.1	0.121548	0	0.132244	0.135816	0.310169	0	0.258855	0.227542	0.0813551	0	0.0947576	0.27046	0.203494	0.301421	0.19968	0	0	0	0.0553528	0	0.209578	0.49647	0.470803	0.137099	0.0841812	0	0.273856	0.519388	0	0	0.0790515	0.490544	0	0	0.233039	0.21417	0.0817826	0.151365	0.0881516	0.142766	0.154641	0.475561	0.104088	0.170445	0	0.0976288	0.184029	0	0.155681
AC063944.3	0	0.119887	0	0	0	0	0.17487	0	0.119629	0.214781	0	0.17368	0	0	0	0	0.133206	0	0.0806179	0	0	0	0	0	0	0.195162	0	0	0	0	0.100939	0.175756	0.142431	0.114837	0	0	0	0	0	0	0	0	0.140425	0	0	0	0.223522	0	0
LINC01990	0	0.0639811	0	0.099212	0	0.136828	0.144781	0	0.056587	0	0.0502059	0	0	0	0.184421	0.114224	0	0	0	0.0703533	0	0.0847062	0.154765	0.0739641	0.0841812	0.0813551	0	0	0	0	0	0.0789544	0.0876759	0.0425379	0	0	0.102299	0	0.0752674	0	0.105362	0	0	0	0	0.0416868	0.0607777	0	0
LINC00636	0	0	0	0	0	0	0	0	0	0	0	0	0	0	0	0	0	0	0	0	0	0	0	0	0	0	0	0	0	0	0.0398842	0	0	0.0515669	0	0	0	0.0996123	0	0	0	0	0	0	0	0	0	0.104843	0
LINC00635	0	0	0	0	0	0	0	0.170837	0	0	0.0831862	0	0	0	0.0985749	0	0	0	0.124799	0	0	0	0	0	0	0.0684425	0	0	0	0.0877553	0	0	0	0	0	0	0	0	0	0	0	0	0.114581	0.0504427	0	0.052235	0	0	0
LINC01215	0	0	0	0	0.0538441	0	0	0	0	0	0	0	0	0.0227751	0	0.0699367	0	0	0	0	0	0	0.0991511	0	0	0.031098	0.0406721	0.113642	0.0544015	0	0	0	0	0	0.0353593	0	0	0	0.0541223	0.0544015	0	0	0	0.0958273	0	0.0337191	0	0	0.0461531
AC063923.2	0	0	0	0	0	0	0	0	0	0	0	0	0	0	0	0	0	0	0	0	0	0	0	0	0	0	0	0	0	0	0	0	0	0	0	0	0	0	0	0	0	0	0	0	0	0	0	0	0
LINC01205	0	0	0	0	0	0	0	0	0	0	0	0	0	0	0	0	0	0	0	0	0	0	0	0	0	0	0	0	0	0	0	0	0	0	0	0	0	0	0	0	0	0	0	0	0	0	0	0	0
AC078980.1	0	0	0	0	0	0	0	0	0	0	0	0	0	0	0	0	0	0	0	0	0	0	0	0	0	0	0	0	0	0	0	0	0	0	0	0	0	0	0	0	0	0	0	0	0	0	0	0	0
AC117430.1	0	0	0	0	0	0	0	0	0	0	0	0	0	0	0	0	0	0	0	0	0	0	0	0	0	0	0	0	0	0	0	0	0	0	0	0	0	0	0	0	0	0	0	0	0	0	0	0	0
AC117402.1	0	0	0	0.135816	0.0841812	0	0	0.156336	0	0	0.122224	0.341102	0.117983	0	0.229831	0	0	0.0942899	0	0	0	0	0	0.146026	0.0841812	0	0.0824789	0	0.095252	0	0	0.114581	0	0	0.0617796	0	0	0	0.132626	0.0653709	0	0.116056	0	0.0425379	0	0	0	0	0.0941273
AC092916.1	0	0	0	0	0	0	0	0	0	0	0	0	0	0	0	0	0	0	0	0	0	0	0	0	0	0	0	0	0	0	0	0	0	0	0	0	0	0	0	0	0	0	0	0	0	0	0	0	0
AC112487.1	0.151365	0.145904	0.224267	0.21113	0.253687	0.107146	0.271674	0	0	0.179222	0.595611	0.490544	0.435441	0.324621	0.125818	0.20321	0.816785	0	0.435441	0.342451	0.274375	0	0.185529	0.226969	0.207205	0	0.133364	0.283117	0	0.156538	0.0790515	0.152237	0	0.153295	0.182921	0.372761	0.219951	0.242826	0	0.0763144	0.245165	0.19989	0.0675734	0.0504427	0.285304	0.300474	0	0	0
AC092894.1	0	0	0	0	0	0	0	0	0	0	0	0	0	0.0258953	0	0	0	0	0.0502827	0	0	0	0	0	0	0	0	0	0	0	0	0	0	0	0	0	0	0	0	0	0	0	0	0	0	0	0	0	0
LINC02042	0	0	0	0	0	0	0	0	0	0	0	0	0	0	0	0	0	0	0	0	0	0	0	0	0	0	0	0	0	0	0	0	0	0	0	0	0	0	0	0	0	0	0	0	0	0	0	0	0
AC078785.2	0	0	0.0561975	0	0	0.08151	0	0	0	0	0	0.0929584	0	0.0300284	0	0	0	0	0	0	0	0	0	0	0	0.0386052	0	0	0	0	0	0	0	0	0	0	0	0	0	0	0	0	0	0	0	0	0	0	0
LINC02044	0.0826448	0.0327141	0.0643588	0	0.0538441	0.0563907	0.100033	0.0500885	0.056587	0.0935807	0	0	0	0.104405	0.0985749	0.0614331	0.0508082	0	0	0.113929	0.0498668	0	0	0.0552087	0.0479195	0.031098	0.0406721	0.0743268	0.117784	0.115687	0.0790515	0.0896522	0	0.0615802	0	0.133206	0.0420575	0.0742301	0.0752674	0	0.0869166	0	0	0.036151	0.102924	0.052235	0	0.0932692	0.0570073
AC108693.2	0	0	0	0	0	0	0	0	0	0	0	0	0	0	0	0	0	0	0	0	0	0	0	0	0	0	0	0	0	0	0	0	0	0	0	0	0	0	0	0	0	0	0	0	0	0	0	0	0
ZBTB20-AS5	0	0	0	0	0	0	0.117503	0.0874334	0	0	0	0	0	0	0	0	0.0810574	0	0	0	0	0	0.185529	0	0.141664	0	0	0	0	0	0	0	0	0.0615802	0	0	0	0	0	0	0	0	0	0.0605955	0	0	0.0704447	0.104843	0
ZBTB20-AS4	0	0	0.0561975	0	0.117042	0.121716	0	0.101316	0	0.168112	0.0831862	0	0.0699922	0	0	0	0	0	0	0.113929	0	0	0	0	0.188935	0.0684425	0.193661	0	0.117784	0.102015	0	0	0.107684	0.0860821	0	0	0	0	0.102299	0	0	0.160747	0	0.0605955	0	0	0	0	0.107398
AC046136.1	0	0	0	0	0	0	0	0	0	0	0	0	0	0	0	0	0	0.147819	0	0	0	0	0	0	0	0	0	0	0	0	0	0	0	0	0	0	0	0	0	0	0	0	0	0	0	0	0	0	0
AC092691.1	0	0.20052	0.0809582	0.463406	0.888913	0.152547	0	0.616453	0	0	0.681271	0	0.182234	0	0	0	0.118352	0.360406	0	0.276886	0	0	0.378048	0	0	0.431442	0.242595	0	0.37458	0	0	0	0	0	0.196669	0.896278	0.126691	0.184948	0.116386	0	0	0	0.127008	0.0844284	0.219716	0.365575	0	0.344721	0
LINC02024	0	0	0	0	0	0	0	0	0	0	0	0	0	0	0	0	0	0	0	0	0	0	0	0	0	0	0	0	0	0	0.118688	0	0	0	0	0	0	0	0	0	0	0	0	0	0	0.171898	0	0	0
AC092691.3	0	0	0	0	0	0	0	0	0	0	0	0	0	0	0	0	0	0	0	0	0	0	0	0	0	0	0	0	0	0	0	0	0	0	0	0	0	0	0	0	0	0	0	0	0	0	0	0	0
AC068633.1	0	0	0	0	0	0	0	0	0	0	0	0	0	0	0	0	0	0	0	0	0	0	0	0	0	0	0	0	0	0	0	0	0	0	0	0	0	0	0	0	0	0	0	0	0	0	0	0	0
AC073352.1	0.293891	0.512945	0.171898	0.36687	0.156224	0.188935	0.184789	0.273354	0.231982	0	0	0.462889	0.304254	0.0938491	0.415196	0.494213	0.25397	0	0.673193	0	0.374976	0	0	0	0	0.112899	0.148781	0.146309	0.170241	0.145026	0.299636	0	0	0	0.669574	0	0.456014	0	0.381041	0.21128	0.196926	0.434966	0.506705	0.0958273	0	0	0	0	0
AC092910.3	0.824472	0.396802	0.925756	0.463406	0.310169	0.543364	0.938241	0.403056	0.31441	0.821721	0.686104	0.232406	0.490544	1.18496	0.714133	0.305903	0.512306	0.292836	0.567303	0.383198	0.241292	0.386174	0.430896	0.455492	0.777363	0.3894	0.691781	0.787916	0.594882	0.728273	0.67583	0.473073	0.26839	0.41159	0.600012	0.3164	0.627902	1.17531	0.408389	0.611655	0.339926	0.816785	0.852319	0.65587	0.141362	0.171898	0.777363	0.522946	0.451568
LINC02035	1.66205	2.28732	1.53407	1.99507	1.51656	2.0699	1.62327	2.15717	1.4629	1.93636	2.12151	1.87045	1.81026	1.50191	1.84024	1.72563	1.5408	2.12151	1.49813	2.04377	2.08263	2.11522	2.3388	2.44713	2.01427	1.81513	1.64056	1.98271	2.2247	1.84555	1.45356	1.85085	2.39111	2.03804	2.44713	1.28677	1.47406	2.10241	1.97059	2.04377	1.79989	1.52044	1.88076	2.79329	1.94224	2.24685	2.4767	3.27929	1.35945
AC092903.2	0	0	0.332029	0	0	0	0.231982	0	0.287847	0	0	0.232406	0	0	0	0	0.181428	0	0	0	0	0	0	0.462889	0	0	0	0.20092	0	0.188388	0	0	0	0.302008	0.405839	0	0	0	0.17368	0.280533	0	0	0	0	0.304023	0	0.161246	0	0
AC063919.1	0	0	0	0	0	0.639722	0	0	0	0	0	0	0	0	0	0	0	0	0	0.516225	0	0	0	0	0	0	0	0	0	0	0	0	0.52346	0	0	0	0	0	0	0	0	0	0	0	0	0	0	0	0
LINC02016	0	0	0	0	0	0	0	0	0	0	0	0	0	0	0	0	0	0	0	0	0	0	0	0	0	0	0	0	0	0	0	0	0	0	0	0	0	0	0	0	0	0	0	0	0	0	0	0	0
LINC01471	0	0	0	0	0	0	0	0	0	0	0	0.0661714	0	0	0	0	0	0	0	0.0557975	0	0	0	0.0293945	0	0	0	0	0	0	0	0	0	0	0.0353593	0	0.0621069	0	0	0	0	0	0	0	0	0	0	0	0
AC016968.1	0	0	0	0	0	0	0	0	0	0	0	0	0	0	0	0	0	0	0	0	0	0	0	0	0	0	0	0	0	0	0	0	0	0	0	0	0	0	0	0	0	0	0	0	0	0	0	0	0
LINC01565	0	0	0.116846	0	0.0841812	0	0	0.186089	0.0388806	0	0.0608666	0	0.0368208	0.0227751	0	0.0456669	0.0413799	0	0	0.0703533	0	0.0631919	0	0.0552087	0.0479195	0.031098	0.0406721	0	0.0544015	0.188388	0.0398842	0.229831	0.0765726	0.139698	0	0	0	0.0742301	0	0.0451138	0.0768486	0	0	0	0.0896522	0.15674	0	0	0
AC112484.3	1.00466	0.175923	0.707402	0.299172	0.935147	0.188935	0.824472	0.214589	1.87045	0.136141	0.570994	0.10704	0.31835	0.522433	0.32676	0.692784	1.02796	0.851043	0.634585	0.171898	0.753593	0.925756	0.416547	0.718049	0.514117	0.258353	0.597035	0.87748	0.570994	0.607818	0.717008	1.18947	0.499309	0.440486	0.684251	0.670491	0.638824	0.347049	1.01907	0.384458	0.473073	0.555404	0.838991	0.293891	0.607818	0.674915	0.522433	1.13291	0.302008
LINC02014	0	0	0	0	0	0	0	0	0	0	0	0	0	0	0	0.0903218	0	0	0	0	0	0	0	0	0	0	0	0.0971508	0	0	0	0	0.107684	0	0	0	0	0	0	0.0763144	0	0	0	0	0.17057	0	0	0	0
LINC02021	0.40122	0.190473	0.397986	0.23674	0.490544	0.484324	0.153295	0.101316	0.567303	0.388633	0.394804	0.666758	0.291848	0.491085	0.107398	0.607818	0.181428	0.349747	0.571869	0.276886	0.668546	0.552354	0	0.479179	0.42715	0.533679	0.16439	0.519388	0.542045	0.360777	0.273605	0.274375	0.441872	0.449354	0.453267	0.54403	0.487786	0.275689	0.663265	0.2471	0.23264	0.909423	0.219951	0.591943	0.607818	0.312666	0.501819	0.272207	0.399395
AC079942.1	0	0	0	0	0	0	0	0	0	0	0	0	0	0	0	0	0	0	0	0	0	0	0	0	0	0	0	0	0	0	0	0	0	0	0	0	0	0	0	0	0	0	0	0	0	0	0	0	0
AC022296.3	0.40122	0	0.368002	0	0	0.264267	0.454969	0	0	0	0	0.252474	0.157816	0.142766	0	0	0	0.417482	0.35101	0	0.161578	0.301715	0.344317	0	0	0.314154	0	0	0.241908	0	0.160551	0	0	0.181745	0.171139	0	0	0	0	0.167397	0	0	0.219951	0.392465	0	0	0.336657	0.213944	0
LINC02004	0.412528	0	0.297649	0	0	0	0.479179	0	0	0	0	0	0	0	0	0.38976	0.3581	0	0	0.40122	0	0	0	0	0	0	0	0	0	0	0	0	0	0	0	0	0	0	0	0	0	0	0	0	0	0.429413	0	0	0
LINC01210	0	0	0	0	0	0	0	0	0	0	0	0	0	0	0	0	0	0	0	0	0	0	0	0	0	0	0	0	0	0	0	0	0	0	0	0	0	0	0	0	0	0	0	0	0	0	0	0	0
AC007159.1	0	0	0	0	0	0	0	0	0	0	0	0	0.0299527	0	0	0	0	0	0	0	0	0	0	0	0	0	0	0	0	0	0	0	0	0	0	0	0	0	0	0	0	0	0	0	0	0	0	0	0
LINC01391	0	0.0489065	0.026965	0	0	0.0563907	0	0.0618092	0	0	0.0391027	0	0.0299527	0	0.089104	0	0	0.0844284	0.066968	0.0557975	0	0	0	0.0333572	0	0	0.0607777	0	0	0	0	0	0.0475765	0.0349649	0	0	0.0508555	0	0	0	0	0	0	0.0230708	0	0	0.0437526	0	0.0570073
BPESC1	0	0	0	0	0	0	0	0	0	0	0	0	0	0	0	0	0	0	0.0615802	0	0	0	0	0	0	0	0	0	0	0	0	0	0	0	0	0	0	0	0	0	0	0	0.0409732	0	0	0	0	0	0
PISRT1	0	0	0	0	0	0	0	0	0	0	0	0	0	0	0	0	0	0	0	0	0	0	0	0	0	0	0	0	0	0	0	0	0	0	0	0	0	0	0	0	0	0	0	0	0	0	0	0	0
AC110716.2	0	0	0	0	0	0	0	0	0	0	0	0	0	0	0	0	0	0	0	0	0	0	0	0	0	0	0	0	0	0	0	0	0	0.0349649	0	0	0	0	0	0	0	0	0	0	0	0	0	0	0
AC016933.1	0.151365	0.109872	0	0	0	0	0	0.257865	0	0	0.225954	0	0	0.291848	0.229831	0.13929	0	0.147819	0	0.418765	0	0.178386	0	0	0	0	0	0.135283	0	0.130446	0.100939	0	0	0.114837	0.115181	0	0.232194	0.184948	0.229016	0.190961	0.182749	0.116056	0	0.0844284	0.219716	0.129128	0.111051	0.139558	0.139955
AC121333.1	0	0	0	0	0	0	0	0	0	0	0	0	0	0	0	0	0	0	0	0	0	0	0	0	0	0	0	0	0	0	0	0	0	0	0	0	0	0	0	0	0	0	0	0	0	0	0	0	0
AC026304.1	0.38976	0.714133	1.36242	0.824472	0.783213	0.440026	0.844363	0.918509	0.660335	1.31958	1.01354	1.10712	0.490544	0.835098	0.747172	0.927177	0.678689	1.39882	0.686104	1.13069	0.973613	0.711273	1.43409	1.2577	0.813211	0.896278	1.33907	1.00992	1.51268	1.44059	0.472183	0.707402	1.1156	0.978991	0.444027	0.876083	1.14797	1.03174	0.778503	1.30612	1.05334	1.06851	0.670491	0.459662	0.666758	0.397986	0.802476	0.602581	1.33907
AC018450.2	0	0	0	0	0	0	0	0	0	0	0	0	0	0	0	0	0	0	0	0	0	0	0	0	0	0	0	0	0	0	0	0	0	0	0	0	0	0	0	0	0	0	0	0	0	0	0	0	0
AC055758.2	0	0	0	0	0	0	0	0	0	0	0	0	0	0.324621	0	0	0	0	0	0	0	0	0	0	0	0	0	0	0	0	0	0	0	0.0860821	0	0	0	0.121937	0	0	0	0	0	0.0425379	0	0	0	0.104843	0
AC055758.1	0	0.275007	0	0	0	0	0	0	0	0	0	0	0	0.0707	0	0	0	0	0	0	0	0	0	0	0	0	0	0	0	0	0.247329	0	0	0	0	0	0	0.167156	0	0	0	0	0.127008	0	0	0	0	0.139558	0
LINC02010	0	0	0	0	0	0	0	0	0	0	0	0	0	0	0	0	0.0508082	0	0	0	0	0	0	0	0	0	0	0	0	0	0	0	0	0	0	0	0	0	0	0	0	0	0	0	0	0	0	0	0
AC092925.1	0	0	0	0	0	0	0	0	0	0	0	0	0	0	0	0	0	0	0	0	0	0	0	0	0	0	0	0	0	0	0	0	0	0	0	0	0	0	0	0	0	0	0	0	0	0	0	0	0
LINC02032	0	0	0	0	0	0	0	0	0	0	0	0	0	0	0	0	0	0	0	0	0	0	0	0	0	0	0	0	0	0	0	0	0	0	0	0	0	0	0	0	0	0	0	0	0	0	0	0	0
AC092958.2	0	0	0	0	0	0	0	0	0	0	0	0	0	0	0	0	0	0	0	0	0	0	0	0	0	0	0	0	0	0	0	0	0	0	0	0	0	0	0	0	0	0	0	0	0	0	0	0	0
AC025566.1	0	0	0	0	0	0	0	0	0	0	0	0	0	0	0	0	0	0	0	0	0	0	0	0	0	0	0	0	0	0	0	0	0	0	0	0	0	0	0	0	0	0	0	0	0	0	0	0	0
LINC02046	0	0	0	0.299172	0	0	0	0	0	0	0	0	0	0	0	0	0	0	0	0	0	0	0	0	0	0	0	0	0	0	0	0.30865	0	0	0	0	0	0	0	0	0	0	0	0	0	0	0	0	0
AC108751.4	0.0826448	0.209963	0.177617	0.117784	0.117042	0.0937905	0	0.117308	0.148781	0.127555	0.188761	0.154765	0.277891	0.136141	0	0.42715	0.194214	0.0844284	0.0502827	0	0.172695	0	0.544729	0.155135	0.272207	0.125759	0.16439	0.166069	0	0.115687	0.160551	0.330421	0.172496	0.139698	0.222043	0	0.197072	0.167156	0.116386	0.304254	0.096723	0	0	0.036151	0.129713	0.0632845	0.313554	0.996494	0
AC117395.1	0	0	0	0	0	0	0	0	0	0	0	0	0	0.0508555	0	0	0	0	0	0.310169	0	0	0	0	0.325289	0	0	0	0	0	0.0699367	0	0	0.449354	0	0	0.0916209	0	0	0	0	0	0	0	0	0	0.0824789	0	0.321122
LINC01998	0	0.0565523	0.0353593	0	0.0538441	0	0	0	0	0	0.0391027	0.0794373	0.0299527	0.0258953	0	0	0	0	0	0	0	0	0	0	0	0	0	0	0	0	0	0	0.0565176	0	0	0	0.0508555	0	0	0	0.0665708	0	0	0	0	0	0	0	0
AC117386.1	0	0	0	0	0	0	0	0	0	0	0	0	0	0	0	0	0	0	0	0	0	0	0	0	0	0	0	0	0	0	0	0	0	0	0	0	0	0	0	0	0	0	0	0	0	0	0	0.125263	0
LINC01213	0	0	0	0	0	0	0	0	0.138539	0	0	0	0	0.104405	0	0.165961	0	0	0	0	0	0	0	0	0.141664	0	0	0.166069	0	0.145026	0	0	0	0	0	0	0	0	0	0.128965	0.339926	0	0	0	0	0	0	0	0.321122
LINC01214	0	0	0	0	0	0	0	0	0	0	0	0	0	0	0	0	0	0	0	0	0	0	0	0	0	0	0	0	0	0	0	0	0	0.243559	0	0	0	0	0	0	0.403936	0	0	0	0	0.300474	0.260932	0	0
LINC02066	0	0	0	0	0	0	0	0	0	0	0	0	0.0847062	0	0	0	0	0	0	0	0	0	0	0	0	0	0	0	0	0	0	0	0	0	0	0	0	0	0	0	0	0	0	0	0	0	0	0	0
AC108718.1	0	0	0	0	0	0	0	0	0	0	0	0	0	0	0	0	0	0	0	0	0	0	0	0	0	0	0	0	0	0	0	0	0	0	0	0	0	0	0	0	0	0	0	0	0	0	0	0	0
AC092924.1	0	0	0	0	0	0	0	0	0	0	0	0	0	0	0	0	0	0	0	0	0	0	0	0	0	0	0	0	0	0	0	0	0	0	0	0	0.149829	0.212558	0	0	0	0	0	0	0	0	0	0	0
AC078788.1	0	0	0	0	0	0	0	0	0	0	0	0	0	0	0	0	0	0	0	0	0	0	0	0	0	0	0	0	0	0	0.0790515	0	0	0	0	0	0	0	0	0	0	0	0	0	0	0	0.0824789	0	0
C3orf79	0	0	0	0	0	0	0	0	0	0	0	0	0	0	0	0	0	0	0	0	0	0	0	0	0	0	0	0	0	0	0	0	0	0	0	0	0	0	0	0	0	0	0	0	0	0	0	0	0
AC068985.1	0	0	0	0	0	0	0	0	0	0	0	0	0	0	0	0	0	0	0	0	0	0	0	0	0	0	0	0	0	0	0	0	0	0	0	0	0	0	0	0	0	0	0	0	0	0	0	0	0
AC092994.1	0	0	0	0	0	0	0	0	0	0	0	0	0	0	0	0	0	0	0	0	0	0	0	0	0	0	0	0	0	0	0	0	0	0	0	0	0	0	0	0	0	0	0	0	0	0	0	0	0
AC073359.2	0	0	0	0	0	0	0	0	0	0	0	0	0	0	0	0	0	0	0	0	0	0	0	0	0	0	0	0	0	0	0	0	0	0	0	0	0	0	0	0	0	0	0	0	0	0	0	0	0
AC073359.1	0	0	0	0	0	0	0	0	0	0	0	0	0	0	0	0	0	0	0	0	0	0	0	0	0	0	0	0	0	0	0	0	0	0	0	0	0	0	0.132626	0	0	0	0	0	0	0	0	0	0
LINC01487	0	0	0	0	0	0	0	0	0	0	0	0	0	0	0	0	0	0	0	0	0	0	0	0	0	0	0	0	0	0	0	0	0	0	0	0	0	0	0	0	0	0	0	0	0	0.187343	0	0	0
AC104831.1	0	0	0	0	0	0	0	0	0.159497	0	0	0	0	0	0	0.190196	0	0	0	0	0	0	0	0	0	0	0	0	0	0	0	0	0	0	0	0	0	0	0	0	0	0	0	0	0	0	0	0	0
LINC00886	0.792692	1.17056	1.09872	1.15237	1.45018	1.62732	1.79572	1.27051	1.05728	2.10893	1.57967	1.13691	2.15717	1.60406	1.08061	1.13491	1.67019	1.82	0.563902	1.17789	1.57582	1.43409	0.989509	1.18947	1.0646	1.24451	1.59149	0.918509	1.39246	1.31958	0.738556	1.87045	1.39564	1.64512	1.57967	0.938241	2.00174	0.670491	1.22886	1.23938	1.91314	1.37439	0.733323	1.1684	1.48416	1.0646	2.27125	0.514588	0.552898
LINC00881	0	0.0730557	0.072017	0.311594	0.0996802	0.248333	0.258855	0.0874334	0.189109	0	0	0.12273	0.528473	0.16296	0	0.127008	0.282152	0.135025	0.217788	0	0.508391	0.117308	0	0.0552087	0.514117	0.0566978	0.148781	0	0	0.213785	0.160551	0.284987	0	0.41159	0.182921	0.185946	0.138884	0.991272	0	0.178386	0	0	0.15303	0.0425379	0.153667	0.429413	0.237516	0.104843	0
AC079943.2	0	0	0	0	0	0	0	0	0	0	0	0	0	0	0	0	0	0	0	0	0	0	0	0	0	0	0	0	0	0	0	0	0	0	0	0	0	0	0	0	0	0	0	0	0	0	0	0	0
AC079943.1	0	0	0	0	0	0	0	0	0	0	0	0	0	0	0	0	0	0	0	0	0	0	0	0	0	0	0	0	0	0	0	0	0	0	0	0	0	0	0	0	0	0	0	0	0	0	0	0	0
LINC01100	0	0	0	0	0	0	0	0	0	0	0	0	0	0	0	0	0	0	0	0	0	0	0	0	0	0	0	0	0	0	0	0	0	0	0	0	0	0	0	0	0	0	0	0	0	0	0	0	0
LINC02067	0.0826448	0.0395809	0.026965	0	0	0	0	0	0.0388806	0	0.0502059	0	0.0299527	0.0227751	0.125818	0.0456669	0.0508082	0.0667603	0.0383504	0	0	0	0	0.046865	0	0.0386052	0.0406721	0.0504427	0	0	0.028215	0.152237	0.0669142	0.0425379	0.0353593	0	0	0	0.0428617	0	0	0.035029	0	0.0308068	0.0896522	0	0	0	0.0811566
AC112491.1	4.26934	6.30796	6.9588	2.44713	5.54793	4.99909	2.58798	5.42362	3.94932	3.97621	6.71068	2.79329	3.10824	3.24393	4.40899	3.31792	5.09563	5.95825	0.955803	4.26934	2.87438	1.66612	6.30796	2.89935	5.09563	4.47958	3.81408	4.40899	6.9588	5.20259	3.42641	6.2227	5.20259	3.19257	4.14837	4.55173	6.13743	3.81408	3.71703	6.04784	6.71068	3.92243	6.9588	1.61542	3.38983	4.63035	3.86866	1.21082	5.95825
AC131211.1	0	0	0	0	0	0	0	0	0	0	0	0	0	0	0	0	0	0	0.361654	0	0	0	0	0	0	0	0	0	0	0	0	0	0	0	0	0	0	0	0	0	0	0	0	0	0	0	0	0	0
AC128685.1	0	0	0	0	0	0	0	0	0	0	0	0	0	0	0	0	0	0	0	0	0	0	0	0	0	0	0	0	0	0	0	0	0	0	0	0	0	0	0	0	0	0	0	0	0	0	0.0437526	0	0
LINC01192	0	0	0	0	0	0	0	0	0	0	0	0	0	0	0	0	0	0	0	0	0	0	0	0	0	0	0	0	0	0	0	0	0	0.127692	0	0	0	0	0	0	0	0	0	0	0	0	0	0	0
AC079910.1	0	0	0	0	0	0	0	0	0	0	0	0	0	0	0	0	0	0	0	0	0	0	0	0	0	0	0	0	0	0	0	0	0	0	0	0	0	0	0	0	0	0	0	0	0	0	0	0	0
LINC01323	0	0	0	0	0	0	0	0	0	0	0	0	0	0	0	0	0	0	0	0	0	0	0	0	0	0	0	0	0	0	0	0	0	0	0	0	0	0	0	0	0	0	0	0	0	0	0	0	0
LINC01324	0	0	0	0	0	0	0	0	0	0	0	0	0	0	0	0	0	0	0	0	0	0	0	0	0	0	0	0	0	0	0	0	0	0	0	0	0	0	0	0	0	0	0	0	0	0	0	0	0
LINC01326	0	0	0	0	0	0	0	0	0	0	0	0	0	0	0	0	0	0	0	0	0	0	0	0	0	0	0	0	0	0	0	0	0	0	0	0	0	0	0	0	0	0	0	0	0	0	0	0	0
LINC01327	0	0	0	0	0	0	0	0	0	0	0	0	0	0	0	0	0	0	0	0	0	0	0	0	0	0	0	0	0	0	0	0	0	0	0	0	0	0	0	0	0	0	0	0	0	0	0	0	0
AC026353.1	0	0	0	0	0	0	0	0	0	0	0	0	0	0	0	0	0	0	0	0	0	0	0	0	0	0	0	0	0	0	0	0	0	0	0	0	0	0	0	0	0	0	0	0	0	0	0	0	0
LINC02082	0.188575	0.0825679	0	0	0	0.228138	0	0.101316	0.320776	0	0.0831862	0	0	0.376391	0.157055	0.315215	0.0925858	0.105125	0.0944701	0	0.0721797	0.3581	0	0.532361	0	0.195162	0.0934571	0	0	0	0	0	0.256793	0.219437	0.0723851	0	0.161473	0.226969	0	0	0.23264	0.222233	0.173244	0.125109	0	0.261859	0.151652	0.186895	0
AC092954.1	0	0	0.21492	0	0.474193	0	0	0.186089	0.159497	0.279512	0.164238	0.232406	0.25397	0.572522	0.295672	0	0.168686	0	0	0	0.146946	0	0	0.343722	0.351901	0	0.193661	0	0.208851	0	0.364275	0	0	0.276623	0	0	0.434966	0	0	0.142766	0	0.145484	0.19307	0	0	0.171898	0	0	0
AC092954.2	0	0	0	0	0	0	0	0	0.159497	0	0.177517	0	0.145262	0.419196	0	0	0	0	0	0.207007	0.146946	0	0	0.137099	0	0	0	0	0	0	0	0	0	0.153295	0	0	0.186224	0	0	0	0	0	0	0	0	0	0	0	0
TERC	0	0	0	0	0	0	0	0	0	0	0	0	0	0	0	0	0	0.269069	0	0	0	0.478325	0	0	0	0.32676	0	0	0	0.130446	0	0	0	0	0	0.451568	0	0	0	0.190961	0	0.360777	0	0.277605	0	0	0	0	0
AC073288.1	0	0	0	0	0	0	0	0	0	0	0	0	0	0	0	0	0	0	0	0	0	0	0	0	0	0	0	0	0	0	0	0	0	0	0	0	0	0	0	0	0	0	0	0	0	0	0	0	0
AC026316.2	0	0	0	0	0	0	0	0	0	0	0	0	0	0	0	0	0	0	0	0	0	0	0	0	0	0	0	0	0	0	0	0	0	0	0	0	0	0	0	0	0	0	0	0	0	0	0	0	0
AC092919.1	0	0	0	0	0	0	0	0	0.546044	0	0	0	0	0	0	0	0	0	0	0.629741	0	0	0	0	0	0	0	0	0	0	0	0	0	0.532361	0	0	0	0	0	0	0	0	0	0	0	0	0	0	0
TMEM212-AS1	0	0	0	0	0	0	0	0	0	0	0	0	0	0	0	0	0	0	0	0	0	0	0	0	0	0	0	0	0	0	0	0	0	0	0	0	0	0	0	0	0	0	0	0	0	0	0	0	0
LINC02068	0.0503764	0.0489065	0.0416362	0.099212	0	0.0563907	0.0845854	0	0.0465857	0	0.0711879	0.0661714	0	0.0258953	0.089104	0.0456669	0.0413799	0.0844284	0.0415507	0.0703533	0.038132	0	0.154765	0.0860821	0	0.0566978	0.802476	0.0442621	0.0544015	0.074768	0.263065	0.0602366	0.0475765	0.127692	0.267194	0.145141	0	0.0742301	0	0.0889081	0.0869166	0	0.049917	0	0	0.312666	0.0607777	0.344721	0.069478
LINC01208	0	0	0	0	0	0.107146	0	0	0	0	0.0711879	0.10704	0.0558893	0.0420811	0	0.277149	0	0.0942899	0	0.0976288	0	0	0.250253	0	0	0	0.0824789	0	0	0	0.052302	0.114581	0	0	0	0	0	0	0.148561	0	0	0	0.202834	0.0425379	0	0	0	0	0
LINC01209	0	0	0	0	0	0	0	0	0	0	0	0	0	0	0	0	0	0	0	0	0	0	0	0	0	0	0	0	0	0	0.0328534	0	0	0	0	0	0	0	0	0	0	0	0	0	0	0	0	0	0
LINC00501	0	0.0395809	0.0353593	0	0.0538441	0	0	0.0500885	0.0465857	0.0935807	0.0391027	0	0	0.0258953	0	0	0	0	0	0	0.038132	0	0	0	0	0	0	0	0	0	0.0328534	0	0	0.0425379	0	0.119758	0.0508555	0.087163	0	0	0	0	0	0	0	0	0	0.0816648	0
AC026355.2	0	0	0	0	0	0	0	0	0	0	0	0	0	0	0	0	0	0	0	0	0	0	0	0	0	0	0	0	0	0	0	0	0	0	0	0	0	0	0	0	0	0	0	0	0	0	0	0	0
AC026355.1	0	0	0	0	0	0	0	0	0	0	0	0	0.0847062	0.142766	0	0	0	0	0	0	0.0990901	0	0	0	0	0	0	0	0.130757	0	0.0895155	0	0.222696	0	0	0	0	0	0.213413	0.0889081	0	0	0	0	0	0	0	0	0.121149
LINC02015	0.0921472	0.234604	0.205117	0.180173	0.156224	0.248333	0.0688976	0.214589	0.0994543	0.397183	0.213199	0.154765	0.117983	0.115138	0.807006	0.219159	0.0925858	0.226334	0.159712	0.187894	0.241292	0.129456	0.354184	0.216963	0.238171	0.32676	0.16439	0.301421	0.130757	0.130446	0.0398842	0.229831	0.161708	0.289011	0.303184	0.107563	0.0916209	0.121937	0.148561	0.280533	0.441409	0.116056	0.202834	0.40122	0.0896522	0.227357	0.0704447	0.0695902	0.0811566
AC007953.1	0	0	0	0	0.237913	0.3214	0	0	0	0	0	0	0	0.278786	0	0	0.218662	0	0	0	0.0990901	0	0.214396	0	0.123	0.258353	0	0	0.254765	0	0	0	0	0	0.0986464	0	0.126691	0	0	0	0.3096	0	0	0.0844284	0.385756	0	0	0	0
AC007953.2	0	0	0	0	0	0	0	0	0	0	0	0	0	0	0	0	0	0	0	0	0	0	0	0	0	0	0	0	0	0	0	0	0	0	0	0	0	0	0	0	0	0	0	0	0	0	0	0	0
AC076966.1	0	0	0	0	0	0	0	0	0	0	0	0	0	0	0	0	0	0	0	0	0	0	0	0	0	0	0	0	0	0	0	0	0	0	0	0	0	0	0	0	0	0	0	0	0	0	0	0	0
AC007823.1	0.357678	0.0395809	0.0303587	0.126056	0.190473	0.0678785	0.135988	0.117308	0.119629	0.168112	0	0.10704	0.102666	0.0938491	0.136733	0	0.270989	0.0667603	0.0502827	0.0976288	0.0610902	0.1433	0.111051	0.046865	0	0.0386052	0.133364	0.0585187	0.143923	0	0.100939	0.195362	0	0.0425379	0	0.172296	0	0.184948	0.132626	0.156112	0	0.0639811	0.127008	0.0605955	0	0.187343	0.0607777	0.0932692	0.139955
LINC02053	0	0	0	0	0	0	0	0	0	0	0	0	0	0	0	0	0	0	0	0	0	0	0	0	0	0	0	0	0	0	0	0	0.161708	0	0	0	0	0	0	0	0	0	0	0	0	0	0	0	0
AC125618.1	0.140425	0.190473	0	0	0	0	0.271674	0.241908	0.109161	0	0	0.304867	0.102666	0	0.214781	0	0	0.135025	0	0	0	0	0	0	0.123	0.258353	0	0	0.143923	0	0.175923	0.407238	0.343722	0.376793	0.0986464	0	0	0.305519	0.116386	0.178386	0	0	0.127008	0.0844284	0.520021	0	0.111051	0	0.260191
AC022294.1	0	0	0	0	0	0	0	0	0	0	0	0	0	0	0	0	0	0	0	0	0	0	0	0	0	0	0	0	0	0	0	0	0	0	0	0	0	0	0	0	0	0	0	0	0	0	0	0	0
AC125613.1	0	0	0	0	0	0	0	0	0	0	0	0	0	0	0	0	0	0	0	0	0	0	0	0	0	0	0	0	0	0	0	0	0	0	0	0	0	0	0	0	0	0	0	0	0	0	0	0	0
LINC01206	0	0	0	0	0	0	0	0	0	0	0	0	0	0	0	0	0	0	0	0	0	0	0	0	0	0	0	0	0	0	0.0328534	0	0	0	0	0	0	0	0	0	0	0	0.0409732	0	0	0.0337191	0	0	0
AC084211.1	0	0	0	0	0	0	0	0	0	0	0	0	0	0	0	0	0	0	0	0	0	0	0	0	0	0	0	0	0	0	0	0	0	0	0	0	0	0	0	0	0	0	0	0	0	0	0	0	0
LINC01994	0	0	0	0	0	0	0	0	0	0	0.0608666	0	0	0	0	0	0	0	0	0	0	0	0	0	0	0	0	0	0	0	0	0	0	0	0	0	0	0	0	0	0	0	0	0	0	0	0	0	0
LINC01995	0	0	0	0	0	0	0	0	0	0	0	0	0	0	0	0	0	0	0	0	0	0	0	0	0	0	0	0	0	0	0	0	0	0	0	0	0	0	0	0	0	0	0	0	0	0	0	0	0
LINC02031	0	0	0	0	0	0	0	0	0	0	0	0	0	0	0	0	0	0	0	0	0	0	0	0	0	0	0	0	0	0	0	0	0	0	0	0	0	0	0	0	0	0	0	0	0	0	0	0	0
AC083801.2	0.0735923	0.0489065	0	0	0	0	0	0	0	0	0	0	0	0.0508555	0	0	0	0	0	0	0	0	0	0	0	0	0	0.0658188	0	0	0	0	0	0	0	0	0	0	0	0	0	0	0	0	0	0	0	0	0
LINC01839	0	0	0	0	0	0	0	0.101316	0	0	0	0	0	0	0	0	0	0	0	0	0	0	0	0	0	0	0	0	0	0	0	0	0	0	0	0	0	0	0	0	0	0	0	0	0	0	0	0	0
AC107294.2	0.40122	0.370365	0.235958	0.353331	0.441409	0.121716	0.126915	0.101316	0.67583	0.157055	0.0831862	0.402151	0.543364	0.60694	0.647428	0.315215	0.23264	0.487285	0.124799	0.383198	0.0721797	0.373688	0.290394	0.383198	0.48928	0.652502	0.181119	0.550162	0.194214	0.312462	0.45454	0.3214	0.640653	0.219437	0.33273	1.62327	0.232194	0.226969	0.649158	0.142766	0.23264	0.475561	0.386174	0.346259	0.938241	0.654973	0.281123	0.259131	0.632931
AC107294.3	0	0.810796	0.160052	0	0.156224	0.170696	0.311183	0.257865	0.609427	0.214781	0	0.32676	0	0.376391	0.229831	0.13929	0.424418	0.159604	0.0806179	0	0.115815	0.373688	0.250253	0.413436	0.272207	0.301421	0.358869	0.135283	0.156336	0.258353	0.192639	0.186749	0.472661	0	0.115181	0.639722	0	0.184948	0.740638	0.103693	0.182749	0.886004	0.256602	0.420078	0.238171	0.129128	0.126244	0.259131	0.276182
LINC02069	0	0.0327141	0	0	0.0841812	0.0563907	0	0.0500885	0	0	0	0	0.0451138	0	0.0985749	0	0.0413799	0	0.0456669	0.0557975	0	0	0	0	0.0479195	0.125759	0	0	0	0	0.0612724	0	0.0475765	0	0.0521681	0	0.0420575	0.347049	0.0428617	0	0	0	0	0	0	0.0337191	0	0	0
LINC02020	0	0	0	0	0	0	0	0	0	0	0	0	0	0	0	0	0	0	0	0	0	0	0	0	0	0	0	0	0	0	0	0	0	0	0	0	0	0	0	0	0	0	0	0	0	0	0	0	0
LINC02052	0	0	0	0	0	0	0	0	0	0	0	0	0	0	0	0	0	0	0	0	0	0	0	0	0	0	0	0	0	0	0	0	0	0	0	0	0	0	0	0	0	0	0	0	0	0	0	0	0
LINC02051	0	0	0	0	0	0	0	0	0	0	0	0	0	0.0508555	0	0	0	0	0.0944701	0	0	0	0	0	0	0	0	0	0	0	0	0	0	0	0	0	0	0	0	0	0.134888	0.0763144	0	0	0	0	0	0	0
LINC02043	0.0664163	0	0.0303587	0	0.0538441	0.0678785	0.100033	0	0.0465857	0.103103	0.0502059	0	0.0368208	0.0300284	0	0	0.104088	0.0844284	0.0898529	0.0703533	0.0498668	0.0731268	0	0.0333572	0.0601399	0	0.0496398	0.0971508	0	0.102015	0	0.0789544	0	0.0425379	0.0428617	0	0	0.087163	0	0	0	0	0.114581	0.036151	0	0.0632845	0.0437526	0.0816648	0
LINC02041	0	0	0.479781	0	0	0	0	0	0.473073	0	0	0	0	0	0	0	0	0	0	0	0	0	0	0	0	0.453267	0	0	0	0	0	0	0	0	0	0	0	0	0	0	0	0	0	0	0	0	0	0	0
AC068295.1	0	0	0	0	0	0	0	0	0	0	0	0	0	0	0	0	0	0	0	0	0	0	0	0	0	0	0	0	0	0	0	0	0	0	0	0	0	0	0	0	0	0	0	0	0	0	0	0	0
LINC01991	0	0	0	0	0	0	0	0	0	0	0	0	0	0	0	0	0	0	0	0	0	0	0	0	0	0	0	0	0	0	0	0	0	0	0	0	0	0	0	0	0	0	0	0.243192	0	0	0.0437526	0	0
AC092941.1	0	0	0	0	0	0	0	0	0	0	0	0	0	0	0	0	0	0	0	0	0	0	0	0	0.207205	0	0	0	0	0	0	0	0	0	0.150114	0	0	0.242826	0	0	0	0	0	0	0.304023	0	0	0	0
AC092941.2	0	0	0	0	0	0	0	0	0.064601	0	0	0	0	0	0	0	0	0	0	0	0	0	0	0	0	0	0	0	0	0	0	0	0	0	0.0521681	0	0	0	0	0	0	0	0	0	0.129713	0	0	0	0
AC022498.1	0	0	0	0	0	0	0	0.101316	0	0	0	0	0	0	0	0	0	0	0	0	0	0	0	0	0	0	0	0	0	0	0	0	0	0	0	0	0	0	0	0	0	0	0	0	0	0	0.0824789	0	0
TPRG1-AS1	0	0.266534	0.240208	0.353331	0.0996802	0.425567	0.379128	0.257865	0.331393	0.464355	0.276182	0.12273	0.792692	0.209771	0.169573	0.315215	0.23264	0.276623	0.443504	0.207007	0.241292	0.249807	0	0.237516	0.272207	0.32676	0.396087	0.17654	0.409572	0.399005	0.0699367	0.483231	0.256793	0.637927	0.0723851	0.19968	0.0916209	0.398407	0.17368	0.2471	0.578542	0.352631	0.30865	0.65587	0.17057	0.588292	0.462889	0.259131	0.276182
AC108747.1	0	0	0	0	0	0	0	0	0	0	0	0	0	0	0	0	0	0	0	0	0	0	0	0	0	0	0	0	0	0	0	0	0	0	0	0	0	0	0	0	0	0	0	0	0	0	0	0	0
LINC02013	0	0	0	0	0	0	0	0	0	0	0	0	0	0	0	0	0	0	0	0	0	0	0	0	0	0	0	0	0	0	0	0	0	0	0	0	0	0	0	0	0	0	0	0	0	0	0	0	0
AC073365.1	0	0	0	0	0	0	0	0	0	0	0	0	0	0	0	0	0	0	0.180173	0	0	0	0	0	0	0	0	0	0	0	0	0	0	0	0	0	0	0	0	0	0	0	0	0	0.141362	0.0632845	0	0	0
AC026320.1	0	0	0	0	0	0	0	0	0	0	0	0	0	0	0	0	0	0	0	0	0	0	0	0	0	0	0	0	0	0	0	0	0	0	0	0	0	0	0	0	0	0	0	0	0	0	0	0	0
AC092966.1	0	0	0	0	0	0	0	0	0	0	0	0	0	0	0	0	0	0	0	0	0	0	0	0	0	0	0	0	0	0	0	0	0	0	0	0	0	0	0	0	0	0	0	0	0	0	0	0	0
LINC02038	0.334675	0.175923	0.0561975	0.690024	0.0996802	0.228138	0.126915	0.468049	0.159497	0.26839	0.0711879	0.192026	0.193256	0.178919	0.243884	0.152772	0.0925858	0.261164	0.0615802	0.383198	0	0	0	0.155135	0.651462	0.112899	0.25455	0.155404	0.194214	0.312462	0.0699367	0.294478	0.460164	0.264915	0.461822	0.19968	0	0.226969	0.0881516	0.410515	0.319829	0.28365	0.281781	0.392465	0.17057	0.429413	0.452689	0.114709	0.534811
LINC02026	0.102862	0	0	0.400725	0.117042	0.300474	0.19477	0.170837	0.0813551	0	0	0	0	0.0938491	0.258128	0.165961	0	0	0	0	0	0	0.166696	0.19968	0.157959	0.0566978	0.228841	0	0.267469	0.0625547	0.0612724	0	0.0987503	0.0734772	0	0.133206	0.0508555	0.212558	0	0.0653709	0	0.101474	0.0849787	0.104715	0	0	0.0437526	0.170445	0
AC024559.1	0	0	0	0	0	0	0	0	0	0	0	0	0	0	0	0	0	0	0	0	0	0	0	0	0	0	0	0	0	0	0	0	0	0	0	0	0	0	0	0	0	0	0.127008	0	0	0	0	0	0
AC024559.2	0	0	0	0	0	0	0	0	0	0	0	0	0	0	0	0	0	0	0	0	0	0	0	0	0	0	0	0	0	0	0	0	0	0	0	0	0	0	0	0	0	1.12848	0	0	0	0	0	0	0
AC080129.1	0	0	0	0	0	0	0	0	0	0	0	0	0	0	0	0	0	0	0	0	0	0	0	0	0	0	0	0	0	0	0	0	0	0	0	0	0	0	0	0	0	0	0	0	0	0	0	0	0
LINC02037	0	0.0489065	0	0	0	0	0	0	0	0	0	0	0	0	0	0	0	0	0	0	0	0	0	0	0	0	0	0	0	0	0	0	0	0	0	0	0	0	0	0	0	0	0	0	0	0	0	0	0
LINC02048	0	0.0565523	0.0416362	0.099212	0.0538441	0	0	0	0.0465857	0.146148	0.0608666	0.0794373	0	0.0826448	0.125818	0	0.0508082	0	0	0	0	0	0	0.046865	0	0	0	0.0585187	0	0.0625547	0.145484	0	0.0565176	0.0425379	0	0	0	0	0	0.0451138	0	0	0.0944701	0.072017	0	0.0416868	0.0437526	0	0
LINC00887	0	0.145904	0.548127	0	0.222696	0.107146	0.0845854	0	0.159497	0.447449	0.150203	0.137522	0.277891	0.291848	0.107398	0.101116	0.657701	0.181273	0.383635	0.0557975	0.115815	0.465841	0.111051	0.0983859	0.389041	0.0684425	0.0496398	0.386174	0.208851	0.074768	0.355404	0.256083	0.0987503	0.153295	0.210282	0	0.174764	0.212558	0.17368	0.0653709	0.339926	0.0429953	0.406708	0.379738	0.117308	0.278482	0.442427	0.688981	0.0570073
AC046143.2	0	0	0	0	0	0	0	0	0	0	0	0	0	0	0	2.66461	0	0	0	0	0	0	0	0	0	0	0	0	0	0	0	0	0	0	0	0	0	0	0	0	0	0	0	0	0	0	0	0	0
AC106706.1	0	0	0	0	0	0	0	0	0	0	0	0	0	0	0	0	0	0	0	0	0	0	0	0	0	0	0	0	0	0	0	0	0	0	0	0	0	0	0	0	0	0	0	0	0	0	0	0	0
LINC01968	0	0.0327141	0	0	0.0538441	0	0	0	0.0388806	0	0	0	0	0.0227751	0	0	0	0	0	0	0	0	0	0	0	0	0	0	0	0.0502553	0	0	0	0.0349649	0.0353593	0	0	0	0	0.036151	0	0	0	0	0	0	0	0	0
LINC01972	0	0	0	0	0	0	0	0	0	0	0	0	0	0	0	0	0	0	0	0	0	0	0	0	0	0	0.242595	0	0	0	0	0	0	0	0	0	0	0	0	0	0	0	0	0	0	0	0	0	0
AC090505.2	0	0	0	0	0	0	0	0	0	0	0	0	0	0	0	0	0	0	0	0	0	0	0	0	0	0	0	0	0	0	0	0	0	0	0	0	0	0	0	0	0	0	0	0	0	0	0	0	0
AC233280.1	0.217589	0.119887	0.25397	0.126056	0.207007	0.152547	0.258855	0.137369	0.0899951	0.157055	0.237061	0.192026	0.182234	0.126691	0.157055	0.101116	0.143923	0.169467	0.378776	0.152547	0.198288	0.129456	0.214396	0.0333572	0.0601399	0.0973112	0.0710338	0.210736	0.105873	0	0.136637	0.0789544	0.0876759	0.114837	0.171139	0.19968	0.0721797	0.167156	0.148561	0.0763144	0	0.0429953	0.15303	0	0	0.0416868	0.0824789	0.170445	0.169185
MUC20-OT1	13.0109	9.99946	11.693	9.99946	11.693	10.7559	10.7559	14.6301	11.693	11.693	10.7559	13.0109	10.7559	10.7559	10.7559	8.80129	10.7559	8.80129	9.99946	10.7559	9.99946	9.99946	9.99946	10.7559	7.53393	8.32585	9.3993	10.7559	9.99946	9.3993	11.693	9.3993	10.7559	11.693	9.99946	11.693	7.53393	9.3993	11.693	10.7559	8.80129	13.0109	11.693	9.99946	11.693	9.3993	10.7559	10.7559	11.693
AC128709.2	0	0	0	0	0	0	0	0	0	0	0	0	0	0	0	0	0	0	0.113712	0	0	0	0	0	0	0	0	0	0	0	0	0	0	0	0	0	0	0	0	0.103693	0	0	0	0	0	0	0.111051	0	0
AC128709.1	0	0	0	0	0	0	0	0	0	0	0.107146	0	0	0	0	0	0	0	0	0	0	0	0	0	0	0	0	0	0	0.213785	0	0.152237	0	0	0	0	0.197072	0	0	0	0	0	0	0	0	0	0	0	0
AC128709.3	0	0	0	0	0	0	0	0	0	0	0	0	0	0	0	0	0	0	0	0	0	0	0	0	0	0	0.10493	0	0.130757	0	0	0	0	0	0	0	0	0	0	0	0	0	0	0	0	0	0	0	0
LINC02012	0.0664163	0.0395809	0.0809582	0.146309	0.156224	0.0678785	0.153295	0.101316	0.109161	0.157055	0.0502059	0.0794373	0.0451138	0.0420811	0	0.0903218	0.0698812	0.135025	0.190473	0.113929	0.161578	0.178386	0.111051	0.0860821	0.238171	0.112899	0.148781	0.123129	0.0863952	0.171299	0.0699367	0.105873	0.233656	0.153295	0.0986464	0.133206	0.138884	0	0	0.178386	0.125699	0.130815	0.140425	0.0605955	0.102924	0.171898	0.0824789	0	0.0570073
AC024560.3	0.293891	0.253687	0	1.38694	1.59976	0.614125	0.808206	0.482224	0.561816	0.727251	0	0	0	0.19477	0.731322	1.08677	0.452112	0.292836	0	0.928783	0.209578	0.373688	0.78552	0.859242	0.302542	0.404347	0.503179	0.273354	0	0	0.532361	0	0.855034	0.41159	1.09294	0	0.495852	0	1.01907	0	0.678689	0.743689	0	0.182563	0.762833	0.933561	0.417929	0.925756	0.289323
AC024560.1	0.468049	0.441872	0.479781	0.918509	1.20854	0.912229	0.918509	0.634585	1.13691	0.770349	0.511668	1.65763	0.734412	0.474193	0.592736	0.371223	0.888913	0.394318	0.370365	0.499979	0.573777	0.577833	0.718049	0.0552087	0.172296	0.0386052	0.264267	0.443504	0.328028	0.744918	0.941402	0	0.67583	0.570994	0.684251	1.19683	0.514588	0.7151	1.19436	0.224267	0.182749	0.130815	0.430896	0.170445	0.594882	0.674915	0.532361	0.292575	0.334254
AC055764.2	0	0.0825679	0	0.156897	0.190473	0.35149	0.135988	0.20092	0.159497	0	0.237061	0.137522	0.26533	0.0508555	0.507726	0.190196	0.244208	0.204551	0	0.310169	0.374976	0	0.416547	0.257865	0.289635	0.57515	0.0934571	0	0.289011	0	0.0699367	0.340809	0.186089	0.0860821	0.150114	0	0.242365	0.136733	0.102299	0	0.134888	0.160747	0.256602	0.0605955	0.187894	0.187343	0.417929	0.728273	0.107398
AC092574.1	0.525428	0.832366	0.595611	0.280006	0.527747	0	0	0.363498	0.42758	0	0.177517	0.600012	0.528473	0.62124	0.315215	0.20321	0.327714	0	0	0.40122	0.386591	0.478325	0.573175	0.470803	0.376391	0.288384	0.515641	0.20092	0	0.360777	0	0.833803	0.364275	0.314154	0.303184	0	0.487786	0.259131	0.186481	0.280533	1.02621	0.160747	0.803534	0.370949	0.552354	0.397986	0.556658	0.201099	0
AC139887.3	0	0	0.0561975	0	0	0	0	0	0	0	0	0	0	0	0	0	0	0	0	0	0	0	0	0	0	0	0	0	0	0	0	0	0	0	0	0	0	0	0	0	0	0	0	0	0.17057	0	0	0	0
AC019103.1	0	0	0	0	0	0	0	0	0	0	0	0	0	0	0	0	0	0	0	0	0	0	0	0	0	0	0	0	0	0	0	0	0	0	0	0	0	0	0	0	0	0	0	0	0	0	0	0	0
AC147067.2	0	0	0	0	0	0.49647	0	0	0.320776	0	0.695536	0	0.291848	0.727251	0	0.407238	0	0	1.67495	0	0	0	0.673193	0.274375	0.442982	0.589654	0.415196	0	0	0	0	0.572522	0	0	0.600012	0	0.417036	0	0.365575	0.330099	0	0	0.478325	0.48928	0	0	0.608696	0.396444	0
AC147067.1	0.589654	0.266534	0.454111	0.43958	0.137099	0	0.258855	1.08677	0.862156	0.190196	0.276182	0.917047	0.554821	0.491085	0.353712	0.494213	0.295672	0.250508	0.252688	0.363123	0.430385	0.679444	0.646558	0.165383	0.933561	0.404347	0.228841	1.18706	0.352313	0.654973	0.38976	1.08879	0.320129	0.195362	0.182921	0.229304	0.37599	0.398407	0.579348	0.440486	0.296696	0.19989	0.30865	0.441409	1.06274	0.348056	0.639722	0.663265	0.632931
AC016773.1	0.919957	0.954231	1.49117	1.25501	1.04735	0.812003	1.32804	0.748197	1.41248	0.918509	0.957345	0.917047	0.590325	1.64056	1.03965	1.13491	0.935147	0.860899	1.84024	0.687021	1.18706	0.31441	1.11768	1.01712	0.999623	0.796144	0.755853	1.82	1.36846	1.27568	1.42419	0.840349	0.724226	1.00128	1.15928	1.02446	0.893261	1.14797	0.92287	0.886004	0.277149	0.909423	1.07056	0.78552	0.713166	0.61793	0.87748	1.34748	0.697552
AL590235.1	0	0	0	0	0	0	0	0.117308	0	0	0	0	0.0847062	0	0	0	0	0	0	0.130873	0	0	0	0.208386	0.224402	0	0	0	0	0	0	0	0.117405	0	0	0	0	0	0.102299	0.0889081	0.266272	0.246214	0	0	0	0.0976288	0	0	0
LINC02171	0	0	0	0	0	0	0	0	0	0	0	0	0	0	0	0	0	0	0	0	0	0	0	0	0.0721797	0	0	0	0	0	0	0	0	0	0	0	0	0	0	0	0	0	0	0	0	0	0	0	0
LINC02600	0.448507	0.15674	0.965457	0.146309	0.156224	0.734412	0.56662	0.257865	0.307023	0.26839	0.137099	0.0929584	0.277891	0.419196	0.107398	0.190196	0.104088	0.454111	0.42801	0.171898	0.395688	0.386174	0.185529	0.522946	0.172296	0.140425	0.203954	0.0889081	0.50418	0.213785	0.347049	0.554821	0.0876759	0.195362	0.182921	0.35503	0.579348	0.305519	0.442982	0.117218	0.134888	0.256343	0.444505	0.149118	0.129713	0.328341	0.237516	0.236497	0.232873
AC105415.1	0	0	0	0	0	0	0	0	0.056587	0	0	0	0	0	0	0	0	0	0	0	0	0	0.122371	0.0401039	0	0	0	0	0	0	0	0	0	0	0	0	0	0	0	0	0	0	0	0	0	0	0	0	0
AC113615.1	0	0	0	0	0.0538441	0	0	0.0737704	0.0465857	0.0850772	0	0.0661714	0.0299527	0.0227751	0.089104	0	0	0.0501565	0	0	0	0	0	0	0	0.0464287	0	0	0	0	0	0	0.0565176	0	0.0353593	0	0	0	0	0.036151	0	0.035029	0.049917	0	0	0	0	0	0
LINC02482	0.970361	0.471705	1.29467	1.86554	0.222696	2.72363	1.82991	1.85574	2.03231	1.14577	2.54807	1.41517	3.01452	2.37393	0.893261	1.70264	1.71646	1.97059	1.63167	1.94224	1.27568	0.679444	2.19268	1.33907	2.41852	1.41785	1.64056	0.20092	2.08263	1.79989	1.92485	1.32229	1.81026	2.23215	1.15928	1.45693	1.30612	0.779643	1.87045	1.71646	1.75349	1.21599	1.38694	1.98271	0.320776	2.14991	1.0767	1.51656	2.01427
LINC002481	0.0826448	0.341102	0.0416362	0.167542	0	0.207007	0.100033	0.117308	0.064601	0.119319	0.0502059	0.0929584	0.0847062	0.19477	0.125818	0.0903218	0.0810574	0.0844284	0.0735347	0	0.0844284	0.159604	0.111051	0.137099	0.096952	0.0684425	0.16439	0.0743268	0.267469	0.0625547	0.175923	0.3214	0	0.167542	0	0.158164	0.0508555	0.184948	0.0881516	0.2471	0.182749	0.0429953	0.0675734	0.210123	0.102924	0.0416868	0.0607777	0.155008	0.0941273
LINC02447	0.56662	0.749235	1.19928	2.08263	1.14797	1.66205	1.18286	2.0501	0.713166	1.01712	1.62732	0.880084	1.46662	0.859242	1.72563	0.52482	1.22634	2.09589	0.807006	0.835098	1.5408	2.39111	1.38694	1.43409	1.90716	2.48698	1.38045	0.704451	1.23138	1.33635	1.18496	1.42102	1.86064	1.83508	0.930389	1.32804	1.98271	0.884523	2.34813	1.52044	2.37393	1.24706	1.66205	1.45693	0.536664	1.88076	1.78627	0.71909	0.987799
AC097381.1	0	0	0.0353593	0	0.0699922	0	0	0	0.056587	0.11133	0	0	0.0558893	0	0	0	0	0	0	0	0.0498668	0	0	0.0983859	0.096952	0.0684425	0	0.0658188	0.105873	0	0	0.0896522	0	0	0	0	0.0817826	0	0	0.103693	0.0869166	0	0.0595464	0	0	0	0	0	0
LINC02517	0	0	0	0	0	0	0	0	0	0	0	0	0	0	0	0.152772	0	0	0	0	0	0	0	0	0	0	0	0	0	0	0	0	0	0	0	0	0	0	0	0	0	0	0	0.104715	0	0	0	0	0
AC104825.1	1.89585	1.97059	0.848483	1.95343	1.39882	1.83508	2.23959	2.48698	1.62327	3.33594	1.7302	2.51579	2.67559	2.12151	2.17857	1.79989	1.98271	2.79329	1.23409	2.08926	2.63113	2.15717	2.27125	1.97059	1.90716	1.50191	2.0084	1.89585	2.3217	2.07627	2.63113	3.27929	2.54807	2.20801	2.1715	1.53407	2.55811	2.14991	2.03231	2.14991	2.10893	1.68882	2.20801	2.65363	2.27125	1.63167	3.27929	1.12393	1.76251
AC105345.1	0.266534	0.331093	0.564612	0.600012	0.222696	0.82587	1.11768	0.71909	0.874687	1.24968	0.481333	0.389041	0.755853	0.630581	0.295672	0.905233	0.480858	0.502499	0.457529	0.460718	0.447449	0.87748	0.664204	0.899289	0.48928	0.355765	0.424418	0.52702	0.62124	0.386174	0.493177	0.503179	0.640653	0.550858	1.36846	0.573175	0.771518	0.910826	0.516786	0.526036	0.562504	0.233204	0.430896	0.379738	1.53744	0.570994	0.698474	1.18706	0.260191
AC025539.1	0.0503764	0.0489065	0	0	0	0.0563907	0	0	0.0388806	0	0.0391027	0	0	0.0420811	0	0	0	0	0	0	0.038132	0.0631919	0.0895155	0	0.0479195	0	0	0	0.0544015	0.0502553	0.028215	0	0	0	0.0353593	0	0	0	0	0	0	0	0	0.0230708	0	0.0337191	0	0	0.0461531
LINC02360	0	0	0	0	0	0	0	0	0	0	0	0	0	0	0	0	0	0	0	0	0	0	0	0	0	0	0	0	0	0	0	0	0	0	0.0842421	0	0	0	0	0	0	0	0	0	0	0	0	0	0
LINC02270	0	0	0	0	0	0	0	0	0	0	0	0	0	0	0	0	0	0	0	0	0	0	0	0	0	0	0	0	0	0	0	0	0	0	0	0	0	0	0	0	0	0	0	0	0	0	0	0	0
AC007370.1	0	0	0	0	0	0	0	0	0	0	0	0	0	0	0	0	0	0	0	0	0	0	0	0	0	0	0	0	0	0	0	0	0	0	0	0	0	0	0	0	0	0	0	0	0	0	0	0	0
LINC01097	0	0	0	0	0	0	0	0.0737704	0	0	0	0	0	0.0258953	0	0	0	0	0	0	0	0	0	0	0	0	0	0	0	0	0	0	0	0	0	0	0	0	0	0	0	0	0	0.0262927	0	0	0	0	0
LINC01096	0.0735923	0.0489065	0.153165	0	0.0699922	0.08151	0	0	0	0.11133	0	0	0	0	0.116056	0	0.0605955	0	0	0	0	0	0	0	0	0	0	0.0658188	0.143923	0	0	0.0896522	0	0	0	0.145141	0	0.136733	0.0647148	0	0.0869166	0	0.0595464	0.0504427	0	0	0.210282	0	0
LINC01182	0	0	0	0	0	0	0	0	0	0	0	0	0	0	0	0	0	0	0	0	0	0	0	0	0	0	0	0	0	0	0	0	0	0	0	0	0	0	0	0	0	0	0	0	0	0	0	0	0
AC007126.1	0	0	0.026965	0	0	0	0.0759626	0	0	0	0.0391027	0	0	0	0	0	0	0	0	0	0	0	0	0	0	0	0	0.0442621	0	0	0.028215	0	0.0475765	0	0	0	0	0	0.0428617	0	0	0	0.0409732	0.0230708	0	0	0	0	0
AC073848.1	0	0	0	0	0	0	0	0	0	0	0	0	0	0	0	0	0	0	0	0	0	0	0	0	0	0	0	0	0	0	0	0	0	0	0	0	0	0	0	0	0	0	0	0	0	0	0	0	0
AC092546.1	0	0	0	0	0	0	0	0	0	0	0	0	0	0	0	0	0.143923	0	0	0	0	0	0	0	0	0	0	0	0	0	0	0	0	0	0	0	0	0	0.148561	0	0	0	0	0	0	0	0	0	0
AC006296.2	0	0	0	0	0	0	0	0	0	0	0	0	0	0	0	0	0	0	0	0	0	0	0	0	0	0	0	0	0	0	0	0	0	0	0	0	0	0	0	0	0	0	0	0	0	0	0	0	0
AC006296.1	0	0	0	0	0	0	0	0	0	0	0	0	0	0	0	0	0	0	0	0	0	0	0	0	0	0	0	0	0	0	0	0	0	0	0	0	0	0	0	0	0	0	0	0	0	0	0	0	0
LINC00504	0.0503764	0.0327141	0.026965	0.0798836	0.0841812	0.0563907	0.0688976	0.0500885	0.0388806	0.0850772	0.0391027	0.10704	0.0299527	0.0227751	0.147045	0	0	0.0570073	0	0.0703533	0.038132	0.0731268	0.290394	0.0293945	0.0479195	0.0464287	0.0607777	0.0442621	0.0544015	0.0502553	0.0328534	0	0.0475765	0.0349649	0.0428617	0.158164	0.0420575	0.0742301	0.0541223	0.036151	0	0.0763144	0.0595464	0.0230708	0	0.0337191	0.126244	0.0932692	0.121149
CPEB2-DT	0	0.0730557	0.0303587	0	0	0	0.0845854	0	0	0	0.0502059	0	0.0847062	0.0601399	0	0.0699367	0	0	0	0.0840091	0.0844284	0	0.111051	0.0333572	0	0	0.0496398	0	0	0.0625547	0.0455534	0.0980296	0	0	0	0	0	0	0.0541223	0.036151	0.0768486	0	0.0675734	0.0262927	0	0.0416868	0	0.0695902	0.0570073
AC106894.1	0	0	0	0	0	0	0	0	0	0	0	0	0	0	0	0	0	0	0	0	0	0	0	0	0	0	0	0	0	0	0	0	0	0	0	0	0	0	0	0	0	0	0	0	0	0	0	0	0
LINC02493	0	0	0	0	0	0	0	0	0	0	0	0	0	0	0	0	0	0	0	0	0	0	0	0	0	0	0	0	0	0	0	0	0	0	0	0	0	0	0	0	0	0	0	0	0	0	0	0	0
AC093871.1	0	0	0	0	0	0	0	0	0	0	0	0	0	0	0	0	0	0	0	0	0	0	0	0	0	0	0	0	0	0	0	0	0	0	0	0	0	0	0	0	0	0	0	0	0	0	0	0	0
AC024230.1	0	0	0	0	0	0	0	0	0	0	0	0	0	0	0	0	0	0	0	0	0	0	0	0	0	0	0	0	0	0	0	0	0	0	0	0	0	0	0	0	0	0	0	0	0	0	0	0	0
AC110767.1	0	0	0	0	0	0	0	0	0	0	0	0	0	0	0	0	0	0	0	0	0	0	0	0	0	0	0	0	0	0	0	0	0	0	0	0	0	0	0	0	0	0	0	0	0	0	0	0	0
KCNIP4-IT1	0	0	0	0	0	0	0	0	0	0	0	0	0	0	0	0	0	0	0.0383504	0	0	0	0	0	0	0	0	0	0	0	0	0	0	0	0	0	0	0	0	0	0	0	0	0	0	0	0	0	0
AC097512.1	0	0	0	0	0	0	0	0	0	0	0	0	0	0	0	0	0	0	0	0	0	0	0	0	0	0	0	0	0	0	0	0	0	0	0	0	0	0	0	0	0	0	0	0	0	0	0	0	0
AC092440.1	0	0	0	0	0	0	0	0	0	0	0	0	0	0	0	0	0	0	0	0	0	0	0	0	0	0	0	0	0	0	0	0	0	0	0	0	0	0	0	0	0	0	0	0	0	0	0	0	0
ERVH-1	0	0	0	0	0	0	0	0	0	0	0	0	0	0	0	0	0	0	0	0	0	0	0	0	0	0	0	0	0	0	0	0	0	0	0	0	0	0	0	0	0	0	0	0	0	0	0	0	0
LINC02473	0.0735923	0.0395809	0.026965	0	0.0699922	0	0	0	0.0730065	0.0935807	0	0.0929584	0	0	0	0	0	0	0.0615802	0	0.038132	0	0	0	0.0479195	0	0	0	0	0	0	0.0675734	0.0565176	0.0515669	0.0353593	0	0.0420575	0	0.0647148	0	0	0.0523496	0	0.0262927	0.102924	0.0416868	0	0	0.0461531
AC104662.1	0	0.129238	0	0	0	0	0	0	0.129639	0	0	0.581424	0.304254	0	0	0	0	0.407589	0.169274	0	0.115815	0	0	0.0983859	0	0	0	0	0.170241	0.145026	0.200299	0	0	0	0	0	0.138884	0	0	0.117218	0	0.116056	0.15303	0.191846	0	0.278482	0	0.155008	0
AC092436.2	0	0	0	0	0	0	0	0	0	0	0	0.252474	0	0	0	0	0	0	0	0	0	0	0	0	0	0	0	0	0	0	0	0	0	0	0	0	0	0	0	0	0	0	0	0	0	0	0	0	0
AC133961.1	0	0.0730557	0.137369	0	0	0	0	0	0	0	0.20052	0	0	0.0420811	0.353712	0	0	0.169467	0	0.0976288	0.0721797	0.117308	0	0.0552087	0.238171	0.232406	0	0	0	0.102015	0.0612724	0.123774	0	0	0	0	0	0.121937	0	0	0	0.0763144	0.0849787	0.158984	0.153667	0	0.0704447	0.236497	0.0941273
AC024132.2	0	0	0	0	0	0	0	0	0	0	0	0	0	0	0	0	0	0	0	0	0	0	0	0	0	0	0	0	0	0	0	0	0	0	0	0	0	0	0	0	0	0	0	0	0	0	0	0	0
AC024132.1	0	0	0	0	0	0	0	0	0	0	0	0	0	0	0	0	0	0	0	0	0	0	0	0	0	0	0	0	0	0	0	0	0	0	0	0	0	0	0	0	0	0	0	0	0	0	0	0	0
AC007106.1	0	0	0	0	0	0	0	0	0	0	0	0	0	0	0	0	0	0	0	0	0	0	0	0	0	0	0	0	0	0	0	0	0	0	0	0	0	0	0	0	0	0	0	0	0	0	0	0	0
AC097480.1	0	0	0	0	0	0	0	0	0	0	0	0	0	0	0	0	0	0	0	0	0	0	0	0	0	0	0	0	0	0	0	0	0	0	0	0	0	0	0	0	0	0	0	0	0	0	0	0	0
LINC02364	0	0	0	0	0.0996802	0	0	0	0	0	0	0	0	0	0	0	0	0	0	0	0	0	0	0	0	0	0	0	0	0	0	0	0	0	0	0	0	0	0	0	0	0	0	0	0	0	0	0	0
AC068944.1	0	0	0	0	0	0	0	0	0	0	0	0.10704	0	0	0	0	0	0	0	0	0	0	0	0	0	0	0	0	0	0	0.0328534	0	0	0	0	0	0	0	0	0	0	0	0	0.0262927	0	0	0	0	0
AC109349.1	0	0	0	0	0	0	0	0	0	0	0	0	0	0	0	0	0	0	0	0	0	0	0	0	0	0	0	0	0	0	0	0	0	0	0	0	0	0	0	0	0	0	0	0	0	0	0	0	0
LINC02472	0	0	0	0	0	0	0	0	0	0	0	0	0	0	0	0	0	0	0	0	0	0	0	0	0	0	0	0	0	0	0	0	0	0	0	0	0	0	0	0	0	0	0	0	0	0	0	0	0
LINC02497	0	0	0	0	0	0	0	0	0	0	0	0	0	0	0	0	0	0	0	0	0	0	0	0	0	0	0	0	0	0	0	0	0	0	0	0	0	0	0	0	0	0	0	0	0	0	0	0	0
AC104071.1	0	0	0	0	0	0	0	0	0	0	0	0	0	0	0	0	0	0	0	0	0	0	0	0	0	0	0	0	0	0	0	0	0	0	0	0	0	0	0	0	0	0	0	0	0	0	0	0	0
LINC02501	0	0	0	0	0	0	0	0	0	0	0	0	0	0	0	0	0	0	0	0	0	0	0	0	0	0	0	0	0	0	0	0	0	0	0	0	0	0	0	0	0	0	0	0	0	0	0	0	0
LINC02506	0	0	0.732323	0	0	0	0.126915	0.101316	0.206154	0.157055	0	0	0	0	0	0	0	0	0	0	0	0	0	0	0.632931	0.125759	0.731322	0	0.328028	0.102015	0	0	0	0	0	0	0	0	0	0	0	0	0.163601	0.170445	0	0.413824	0	0	0
LINC02353	0	0	0	0	0	0	0	0	0	0	0	0	0	0	0	0	0	0	0	0	0	0	0	0	0	0	0	0	0	0	0	0	0	0	0	0	0	0	0	0	0	0	0	0	0	0	0	0	0
AC097535.1	0	0	0	0	0	0	0	0	0	0	0	0	0	0	0	0	0	0	0	0	0	0	0	0	0	0	0	0	0	0	0	0	0	0	0	0	0	0	0	0	0	0	0	0	0	0	0	0	0
AC016687.3	0	0.15674	0	0	0	0	0	0	0	0	0	0	0	0	0	0	0	0	0	0	0	0	0	0	0	0	0	0	0	0	0	0	0	0	0	0	0	0	0	0	0	0	0	0	0	0	0	0	0
AC016687.2	0	0	0	0	0	0	0	0	0	0	0	0	0	0	0	0	0	0	0	0	0	0	0	0	0	0	0	0	0	0	0	0	0	0	0	0	0	0	0	0	0	0	0	0	0	0	0	0	0
LINC02484	0	0	0	0	0	0	0	0	0	0	0	0	0.102666	0	0	0	0	0	0	0	0	0	0	0	0.141664	0	0	0	0	0	0	0	0	0	0	0	0	0	0	0	0	0	0	0	0	0	0	0	0
AC093689.1	0	0	0	0	0	0	0	0	0	0	0	0	0	0	0	0	0	0	0	0	0	0	0	0	0	0	0	0	0	0	0	0	0	0	0	0	0	0	0	0	0	0	0	0	0	0	0	0	0
LINC02505	0	0	0	0	0	0	0	0	0	0	0	0	0	0	0	0	0	0	0	0	0	0	0	0	0	0	0	0	0	0	0	0	0	0	0	0	0	0	0	0	0	0	0	0	0	0	0	0	0
AL136537.1	0	0	0	0	0	0	0	0	0	0	0	0	0	0	0	0	0	0	0	0	0	0	0	0	0	0	0	0	0	0	0	0	0	0	0	0	0	0	0	0	0	0	0	0	0	0	0	0	0
LINC02513	0	0	0	0	0	0	0	0	0	0	0	0	0	0	0	0	0	0	0	0	0	0	0	0	0	0	0	0	0	0	0	0.195362	0	0	0	0	0	0	0	0	0	0	0	0	0	0	0	0	0
LINC01258	0	0	0	0	0	0	0	0	0	0	0	0	0	0	0	0	0	0	0	0	0	0	0	0	0	0	0	0	0	0	0	0	0	0	0	0	0	0	0	0	0	0	0	0	0	0	0	0	0
LINC01259	0	0	0	0	0	0	0	0	0	0	0	0	0	0	0	0	0	0	0	0	0	0	0	0	0	0	0	0	0	0	0	0	0	0	0	0	0	0	0	0	0	0	0	0	0	0	0	0	0
LINC02278	0	0	0	0	0	0	0	0	0	0	0	0	0	0	0	0	0	0	0	0	0	0	0	0	0	0	0	0	0	0	0	0	0	0	0	0	0	0	0	0	0	0	0	0	0	0	0	0	0
AC021860.1	0	0	0	0	0	0	0	0	0	0	0	0	0	0	0	0	0	0	0	0	0	0	0	0	0	0	0	0	0	0	0	0	0	0	0	0	0	0	0	0	0	0	0	0.149118	0	0	0.197508	0	0
AC095057.2	0	0	0	0	0	0	0	0	0	0	0	0	0	0	0	0	0	0	0	0	0	0	0	0	0	0	0	0	0	0	0	0	0	0	0	0	0	0	0	0	0	0	0	0	0	0	0	0	0
LINC02265	0	0	0	0	0	0	0	0	0	0	0	0.10704	0	0	0	0	0	0	0	0	0	0	0	0	0	0	0	0	0	0	0	0	0	0	0	0	0	0	0	0	0	0	0	0	0	0	0	0	0
LINC00682	0	0	0	0	0	0	0.0922865	0	0.0994543	0	0.0502059	0	0	0.0258953	0	0	0	0	0	0	0	0	0	0	0	0	0	0	0	0.0625547	0	0	0	0	0	0	0	0	0	0	0	0	0	0	0	0	0	0	0
AC106052.1	0.170979	0	0.387001	0	0.173082	0	0.574378	0	0.331393	0	0.247842	0	0	0.262086	0	0.285304	0.143923	0	0	0	0.386591	0	0	0.19968	0	0	0	0.283117	0	0.156538	0.20681	0	0.153295	0	0.233039	0	0	0.495852	0.266011	0	0	0.130815	0.163601	0	0	0.1433	0	0	0.169185
AC096734.1	0	0.0825679	0.0353593	0	0	0.08151	0	0	0	0	0	0	0	0	0	0	0	0	0	0	0	0	0	0	0	0	0	0	0	0	0	0	0	0	0	0	0	0	0	0	0	0	0	0	0	0	0.0521215	0	0
AC111198.1	0	0	0	0	0	0	0	0	0	0	0	0	0	0	0	0	0	0	0	0	0	0	0	0	0	0	0	0	0	0	0	0	0	0	0	0	0	0	0	0	0	0	0	0	0	0	0	0	0
LINC02383	0	0	0	0	0	0	0	0	0	0	0	0	0	0	0	0	0	0	0	0	0	0	0	0	0	0	0	0	0	0	0	0	0	0	0	0	0	0	0	0	0	0	0	0	0	0	0	0	0
AC110799.1	0	0	0	0	0	0	0	0	0.148781	0	0	0	0	0	0	0	0	0	0	0	0	0	0	0.12744	0	0	0	0	0	0	0	0	0	0	0	0	0	0	0.161246	0.258353	0	0	0	0	0	0.171898	0	0	0
LINC02475	0	0	0.0561975	0	0.0996802	0	0.126915	0	0.056587	0	0	0	0	0.104405	0	0	0.0925858	0	0	0	0	0	0	0.046865	0	0.0464287	0.0496398	0	0	0	0.0699367	0.0675734	0	0	0	0	0	0	0	0.036151	0	0.0429953	0.24003	0.0230708	0.0896522	0.261859	0	0	0.107398
AC108467.1	0	0	0	0	0	0	0	0	0	0	0	0	0	0	0	0	0	0	0	0	0	0	0	0	0	0	0	0	0	0	0	0	0	0	0	0	0	0	0	0	0	0	0	0	0	0	0	0	0
AC107068.1	0.634585	0.810796	0.466937	0.704451	0.646558	0.965457	0.558863	0.944732	0.750273	1.04342	0.883043	0.521828	1.07869	0.603361	0.853676	0.853676	0.564612	0.67583	0.284987	0.792692	0.562504	0.756933	0.975341	0.786723	0.955803	0.374976	0.999623	0.809501	0.935147	0.744918	0.717008	1.10285	0.960524	0.899289	0.841708	0.493177	0.755853	0.509057	0.61793	0.773835	0.847201	0.805807	0.803534	0.672301	0.568656	0.763987	0.890368	0.673193	1.26792
AC027271.1	0.40122	0.582737	0.422565	0.411052	0.296311	0.49647	0.605412	0.302863	0.320776	0.538917	0.559596	0.565274	0.643943	0.968838	0.65587	0.540795	0.270989	0.652502	0.510364	0.130873	0.354657	1.24197	0.337316	0.522946	0.224402	0.232406	0.215476	0.218791	0.582737	0.386174	0.364275	0.669574	0.83093	0.704451	0.516786	0.670491	0.495852	0.275689	0.19989	0.304254	0.86603	0.256343	0.670491	0.591943	0	0.429413	0.336657	0.396444	0.429875
LINC02480	0	0	0	0	0	0	0	0	0	0	0	0	0	0	0	0	0	0	0	0	0	0	0	0	0	0	0	0	0	0	0	0	0	0	0	0	0	0	0	0	0	0	0	0	0	0.0976288	0	0	0
USP46-AS1	0.925756	1.22391	0.714133	1.41248	1.23409	0.718049	0.548127	1.29467	0.620498	1.00992	1.27309	1.04735	0.954231	1.00466	0.747172	0.840349	0.881563	0.742685	0.454969	1.36846	0.518755	1.09081	1.5408	1.29211	1.42419	1.16158	1.3087	1.6983	1.40891	1.06274	0.67583	1.21082	1.45356	1.5488	1.28677	1.22886	1.10079	1.31688	0.687021	1.35647	0.736509	1.26016	0.817936	1.28677	1.19683	1.01712	0.890368	1.2577	1.10712
AC104066.2	0	0.0395809	0.0303587	0	0	0	0	0	0	0	0	0.0794373	0.0368208	0	0.125818	0.0528177	0.0925858	0	0	0	0	0	0	0	0	0	0.0496398	0	0	0	0	0	0	0	0	0	0	0.087163	0.0541223	0	0	0.0763144	0	0.0262927	0	0.0416868	0	0	0
AC110792.3	0	0	0.280006	0.891823	0	0	0	0	0.307023	0	0.894699	0.967147	0.277891	0	0	0.686104	0.348365	0.407589	0	0.383198	0	0.859242	1.45018	0.470803	0	0	0	0.374185	0.470284	0.87748	0.284987	0	0.378048	0	0	0	0	0	0	0.540795	0	0.296696	0.762833	0.459662	0	0	0.313554	0.833803	0.710218
LINC02283	0	0	0	0	0	0	0	0	0	0	0	0	0	0	0	0	0	0	0	0	0	0	0	0	0	0	0	0	0	0	0	0	0	0	0	0	0	0	0	0	0	0	0	0	0	0	0	0	0
AC098587.1	0	0	0	0	0	0	0	0	0	0	0	0	0	0	0	0	0	0	0	0	0	0	0	0	0	0	0	0	0	0	0	0	0	0	0	0	0	0	0	0	0	0	0	0	0	0	0	0	0
AC098868.1	0	0	0	0	0	0	0	0	0	0	0	0	0	0	0	0	0	0	0	0	0	0	0	0	0	0	0	0	0	0	0	0	0	0	0	0	0	0	0	0	0	0	0	0	0	0	0	0	0
LINC02260	0	0	0	0	0	0	0	0	0	0	0	0	0	0	0	0	0	0	0	0	0	0	0	0.0333572	0	0	0	0	0	0	0	0	0	0	0	0	0	0	0	0	0	0	0	0	0	0	0	0	0
AC097494.1	0	0	0	0	0	0	0	0	0	0	0	0	0	0	0	0	0	0	0	0	0	0	0	0	0	0	0	0	0	0	0	0	0	0	0	0	0	0	0	0	0	0	0	0	0	0	0	0	0
LINC02358	0	0	0	0	0	0	0	0	0	0	0	0	0	0	0	0	0	0	0	0	0	0	0	0	0	0.125759	0	0	0	0	0	0	0	0	0	0	0	0	0	0	0	0	0	0	0	0	0	0	0
AC111194.1	0	0	0	0	0	0	0	0	0	0	0	0	0	0	0	0	0	0	0	0	0	0	0	0	0	0	0	0	0	0	0	0	0	0	0	0	0	0	0	0	0	0	0	0	0	0	0	0	0
AC068620.1	0.275348	0.3894	0.287311	0.497666	0.458035	0	0	0	0.119629	0.214781	0.225954	0.551606	0.193256	0.171139	0.229831	0.567303	0	0.380608	0	0	0.115815	0.198081	0.400725	0.185666	0.272207	0.0973112	0.358869	0.135283	0.394804	0.244765	0.273605	0.452689	0.554131	0.41159	0.303184	0	0.242365	0.3164	0.243376	0.280533	0.452689	0.394804	0.140425	0.346259	0.238171	0.261859	0.223522	0.46745	0.612429
AC068620.2	0.255892	0.810796	0.52414	0	0.694661	0.556658	0.38741	0.347746	0.521223	0.368002	0.481333	0.521828	0.708282	1.06097	0.609427	0.42715	0.472661	0.471705	0.298871	0.152547	0.395688	0.601646	0.214396	0.322436	0.25426	0.423399	0.610906	0.550162	0.561072	0.521223	1.49813	0.164238	0.128965	0.289011	0.461822	0.248543	0.647428	1.10079	0.687021	0.678689	0.166878	0.369929	0.833803	0.527747	0.219716	0.243009	0.462889	0.433497	0.565936
AC069307.1	0.478752	0.512945	0.307328	0.43958	0.458035	1.30022	0.534811	0.700411	0.58503	0.652502	1.00128	0.805807	0.130873	0.481333	0	0	0.295672	0.615046	1.12393	0.629741	0.508391	0.627131	0.930389	0.12744	0.351901	0.477213	1.12393	0.338794	0	0.963809	0.717008	0.925756	0.331093	0.505417	0.600012	0	0	0.580789	0.161246	1.04153	0.909423	0	0.183474	0.115371	0.498776	0.171898	0.398407	0.31745	0.185432
AC105390.1	0	0	0	0	0	0	0	0	0	0	0	0	0	0	0	0	0	0	0	0	0	0	0	0	0	0	0	0	0	0	0	0	0	0	0	0	0	0.305519	0	0	0	0	0	0	0	0	0	0	0
AC013724.1	0	0	0	0	0	0	0	0	0	0	0	0	0	0	0	0	0	0	0	0	0	0	0	0	0	0	0	0	0	0	0	0	0	0	0	0	0	0	0	0	0	0	0.0849787	0	0	0	0	0	0
AC107396.1	0	0	0	0	0	0	0	0	0	0	0	0	0	0	0	0	0	0	0	0	0	0	0	0	0	0	0	0	0	0	0	0	0	0	0	0	0	0	0	0	0	0	0	0	0	0	0	0	0
AC093725.2	0	0	0	0	0	0	0	0	0	0	0	0	0	0	0	0	0	0	0	0	0	0	0	0	0	0	0	0	0	0	0	0	0	0	0	0	0	0	0	0	0	0	0	0	0	0	0	0	0
LINC02494	0	0	0	0	0	0	0	0	0	0	0	0	0	0	0	0	0	0	0	0	0	0	0	0	0	0	0	0	0	0	0	0	0	0	0	0	0	0	0	0	0	0	0	0	0	0	0	0	0
AC019133.1	0	0	0	0	0	0	0	0	0	0	0	0	0	0	0	0	0	0	0	0	0	0	0	0	0	0	0	0	0	0	0	0	0	0	0	0	0	0	0	0	0	0	0	0	0	0	0	0	0
AC017091.1	0	0	0	0	0	0	0	0	0	0	0	0	0	0	0	0	0	0	0	0	0	0	0	0	0	0	0	0	0	0	0	0	0	0	0	0	0	0	0	0	0	0	0	0	0	0	0	0	0
LINC02429	0	0	0	0	0	0	0	0	0	0	0	0	0	0	0	0	0	0	0	0	0	0	0	0	0	0	0	0	0	0	0	0	0	0	0	0	0	0	0	0	0	0	0	0	0	0	0	0	0
AC108517.1	0	0	0	0	0	0	0	0	0	0	0	0	0	0	0	0	0	0	0	0	0	0	0	0	0	0	0	0	0	0	0	0	0	0	0	0	0	0	0	0	0	0	0	0	0	0	0	0	0
AC096588.1	0	0	0	0	0	0	0	0	0	0	0	0	0	0	0	0	0	0	0	0	0	0	0	0	0	0	0	0	0	0	0	0	0	0	0	0	0	0	0	0	0	0	0	0	0	0	0	0	0
AC093857.1	0	0	0	0	0	0	0	0	0	0	0	0	0	0	0	0	0	0	0	0	0	0	0	0	0	0	0	0	0	0	0	0	0	0	0	0	0	0	0	0	0	0	0	0	0	0	0	0	0
LINC02271	0	0	0	0	0	0	0	0	0	0	0	0	0	0	0	0	0	0	0	0	0	0	0	0	0	0	0	0	0	0	0	0	0	0	0	0	0	0	0	0	0	0	0	0	0	0	0	0	0
AC020741.1	0	0.0395809	0.0303587	0.108305	0	0	0	0	0	0	0	0.0929584	0	0	0	0	0	0	0	0	0.038132	0	0	0	0	0.031098	0	0.0504427	0	0	0	0	0	0	0.0353593	0	0	0	0.0428617	0	0	0	0	0.0262927	0	0	0	0.0695902	0
AC097491.1	0	0	0	0	0	0	0	0	0	0	0	0	0	0	0	0	0	0	0	0	0	0	0	0	0	0	0	0	0	0	0	0	0	0	0	0	0	0	0	0	0	0	0	0	0	0	0	0	0
AC093730.1	0	0	0	0	0	0	0	0	0	0	0	0	0	0	0	0	0	0	0	0	0	0	0	0	0	0	0	0	0	0	0	0	0	0	0	0	0	0	0	0	0	0	0	0	0	0	0	0	0
LINC02232	0	0	0	0	0	0	0	0	0	0	0	0	0	0	0	0	0	0	0	0	0	0	0	0	0	0	0	0	0	0	0	0	0	0	0	0	0	0	0	0	0	0	0	0	0	0	0	0	0
EPHA5-AS1	0	0	0	0	0	0.08151	0	0	0	0	0	0	0	0	0	0	0	0	0	0	0	0	0	0	0	0	0	0	0	0	0	0	0	0	0	0	0	0	0	0	0	0	0	0	0	0.052235	0	0	0
AC104137.1	0	0	0	0	0	0	0	0	0	0	0	0	0	0	0	0	0	0	0	0	0	0	0	0	0	0.174187	0	0	0	0	0.168112	0	0	0	0	0	0	0	0	0	0	0	0	0	0	0	0	0	0.244208
AC097110.1	0	0	0	0	0	0	0	0	0	0	0	0	0	0	0	0	0	0	0	0	0	0	0	0	0	0	0	0	0	0	0	0	0	0	0	0	0	0	0	0	0	0	0	0	0	0	0	0	0
AC116049.2	0	0	0	0	0	0	0	0	0	0	0	0	0	0	0	0	0	0	0	0	0	0	0	0	0	0.0566978	0	0	0	0	0	0	0	0	0	0	0	0	0	0	0	0	0	0	0	0	0	0	0
AC096721.1	0	0	0	0	0	0	0	0	0	0	0	0	0	0	0	0	0	0	0	0	0	0	0	0	0	0	0	0	0	0	0	0	0	0	0	0	0	0	0	0	0	0	0	0	0	0	0	0	0
AC104806.2	0.0580408	0.697552	0.0303587	0.36687	0.0538441	0.543364	0.320429	0	0.331393	0.26839	0.472661	0.304867	0.602581	0.19477	0	0.23343	0.118352	0.283914	0.133048	0.187894	0.0844284	0.1433	0	0.247842	0.0841812	0.125759	0.53302	0.0743268	0.37458	1.10712	0.192639	0.540795	0.21113	0.376793	0	0.298224	0.514588	0	0.161246	0.142766	0.296696	0.0763144	0.444505	0.546658	0.102924	0.202175	0.111051	0	0
AC068721.1	0	0	0	0	0	0	0	0	0	0	0	0	0	0	0	0	0	0	0	0	0	0	0	0	0	0	0	0	0	0	0	0	0	0	0	0	0	0	0	0	0	0	0	0	0	0	0	0	0
LINC02499	0	0.0730557	0.205117	0.23674	0.441409	0.3214	0	0.186089	0.259418	0	0.634585	0	0.227163	0.115138	0	0	0	0	0	0	0.0721797	0	0	0.226969	0.25426	0.140425	0	0	0	0	0	0	0.0987503	0	0.0723851	0.3164	0.161473	0	0	0.190961	0	0.19989	0	0.277605	0.285304	0.429413	0.151652	0	0.312259
LINC02562	0.301421	0.381041	0.432482	0.223807	0	0.280533	1.24197	0.419196	0	0	0.346259	0	0.193256	0.0420811	0.258128	1.08677	0	0	0.209169	0	0.498243	0.386174	0	0	0	0.644778	0	0	0	0.509057	0.20681	0	0.515058	0.423908	0.703383	0	0	0	0	0	0.420078	0.0763144	0	0	0	0	0	0	0
AC025244.1	0	0	0	0	0.173082	0	0	0	0	0	0.150203	0	0	0	0.463881	0	0	0	0	0.187894	0	0	0.290394	0.117879	0	0.125759	0.16439	0	0	0.156538	0	0	0	0.139698	0.138051	0	0	0	0	0.23674	0	0	0	0	0	0	0	0	0
AC025244.2	0	0	0	0	0	0	0	0	0	0	0	0	0	0.136141	0	0	0	0	0	0	0	0	0	0	0	0	0	0	0	0	0.145484	0	0	0	0	0	0	0	0	0	0	0	0	0	0	0.187343	0	0	0
LINC02483	0	0	0	0	0	0	0	0	0	0	0	0	0	0	0	0	0	0	0	0	0	0	0	0	0	0	0	0	0	0	0	0	0	0	0	0	0	0	0	0	0	0	0	0	0	0	0	0	0
AC096759.1	0	0	0	0	0	0	0	0	0	0	0	0	0	0	0	0	0	0	0	0	0	0	0	0	0	0.125759	0	0	0	0	0	0	0	0.139698	0	0	0	0	0	0	0	0	0	0	0	0	0	0	0
AC092674.1	0	0	0	0	0	0	0	0	0	0	0	0	0	0	0	0	0	0	0	0	0	0	0	0	0	0	0	0	0	0	0	0	0	0	0	0	0	0	0	0	0	0	0	0	0	0	0	0	0
LINC01094	0.121548	0.175923	0.25397	0.561816	0.190473	0.207007	0.144781	0.117308	0.119629	0	0.316084	0.137522	0.215476	0.635336	0.229831	0.266918	0.155547	0.169467	0.228138	0.0840091	0.0990901	0.1433	0.0991511	0.146026	0.312462	0.288384	0.215476	0.283117	0.316762	0.0877553	0.153546	0.380608	0.128965	0.302008	0.182921	0.119758	0	0.347049	0.102299	0.21128	0.182749	0.212783	0.418765	0.742685	0.267469	0.187343	0	0.56662	0.495317
LINC00989	0.121548	0.0639811	0.245663	0.223807	0.26839	0.248333	0.0922865	0.0737704	0.129639	0.157055	0.164238	0	0.0699922	0.152237	0	0.0699367	0.263065	0.0756927	0.137522	0.130873	0.0498668	0.117308	0.154765	0.208386	0.108513	0.112899	0.0824789	0.105298	0.117784	0.130446	0.145484	0.0980296	0.172496	0.167542	0.196669	0.229304	0.0817826	0.087163	0.0428617	0.224267	0.0869166	0.0523496	0.263251	0.218975	0.153667	0.0976288	0.237516	0.0816648	0
AC092542.1	0.284526	0	0.466937	0	0	0	0	0	0	0	0	0	0	0	0	0	0	0	0	0	0	0.3581	0	0	0	0	0	0	0	0	0	0	0	0	0	0	0	0	0.243376	0	0	0.212783	0.281781	0.170445	0	0.526528	0	0	0
LINC02469	0	0	0	0	0	0.3214	0	0	0	0.146148	0	0	0	0	0	0	0	0	0	0	0	0	0.166696	0	0	0	0	0.166069	0.105873	0	0	0	0	0	0.0723851	0	0	0	0	0	0	0	0	0	0	0.15674	0.0704447	0	0
PCAT4	0	0	0.0303587	0	0	0	0	0	0	0	0	0.285853	0.0299527	0	0	0	0	0	0	0	0	0	0	0	0	0	0	0	0	0	0	0	0	0	0.0353593	0	0	0	0	0.036151	0	0	0	0	0	0	0	0	0
AC124016.2	0.284526	0.998058	0.297649	0.478325	0.26839	0.452689	0.396087	0.499309	0.231982	0.859242	0.868787	0.137522	0.643943	0.40122	0.691781	0.407238	0.25397	0.828515	0.327033	0.984265	0.711273	0.478325	0.832366	0.852319	0.514117	0.347049	0.622802	0.273354	0.95109	0.62636	0.322057	0.340809	0.706461	0.748197	0.864722	0.591134	0.749235	0.347049	0.25397	0.837692	0.339926	0.622021	0.552898	0.78552	0.187894	0.61793	0.417929	0.625413	0.365125
LINC00575	0.0921472	0	0	0	0	0	0	0	0.0730065	0	0.0711879	0	0	0.0352676	0	0	0	0	0	0	0	0	0	0	0	0	0	0	0	0	0.052302	0	0	0	0	0	0	0	0	0	0	0	0	0	0	0	0	0	0
AC114781.2	0	0	0	0	0	0	0	0	0	0	0	0	0	0	0	0	0	0	0	0	0	0	0	0	0	0	0	0	0	0	0	0	0	0	0	0	0	0.292212	0	0.178386	0	0	0	0	0	0	0	0.696544	0
AC021192.1	0	0	0	0	0	0	0	0	0	0	0	0	0	0	0	0	0	0	0	0	0	0	0	0	0	0	0	0	0	0	0	0	0	0	0	0	0	0	0	0	0	0	0	0	0	0	0	0	0
AC104063.1	0	0	0	0	0	0	0	0	0	0	0	0	0	0.104405	0.285621	0	0	0	0	0	0	0	0	0	0	0	0	0	0	0	0.0699367	0	0	0	0	0	0	0	0.0881516	0	0	0	0	0	0	0	0	0	0.107398
AC112250.2	0	0.341102	0.0996123	0	0	0	0	0.156336	0	0	0	0	0.117983	0	0	0	0	0	0	0	0.115815	0.216963	0	0	0	0	0	0	0.170241	0	0	0	0.153295	0	0	0	0.149829	0	0.148561	0	0	0.130815	0	0	0	0	0	0	0
AC104785.1	0.579348	0.4055	0.353712	0.311594	0.646558	0.152547	0.625413	0.227542	0.189109	0.662327	0.20052	0.490544	0.469764	0.31745	0.339145	0.114224	0.205824	0.237715	1.13291	0.363123	0.711273	0.31441	0.198802	0.543364	0.123	0.533679	0.316762	0	0.130757	0.399005	0.562504	0.380608	0.128965	0.505417	0.182921	0.815635	0.368002	0.167156	0.396802	0.377232	0.154641	0.434966	0.633758	0.149118	0.35101	0.214781	0.0953538	0.225495	0.121149
AC093810.1	0	0	0	0	0	0	0	0	0	0	0	0	0	0	0	0	0	0	0	0	0	0	0	0	0	0	0	0	0	0	0	0	0	0	0	0	0	0	0	0	0	0	0	0	0	0	0	0	0
AC112695.1	0	0	0	0	0	0	0	0	0	0	0	0	0	0	0	0	0	0	0	0	0	0	0	0	0	0	0	0	0	0	0	0	0	0	0	0	0	0	0	0	0	0	0	0	0	0	0	0	0
AC096746.1	0	0	0	0	0	0	0	0	0	0	0	0	0	0	0	0	0	0	0	0	0.0610902	0	0	0	0	0	0	0	0	0	0	0	0	0	0	0	0	0	0	0	0	0	0	0	0	0	0	0	0
AC108067.1	0	0	0	0	0	0	0	0	0	0	0	0	0	0	0	0	0	0	0	0	0	0	0	0	0	0	0	0	0	0	0	0	0	0	0	0	0	0	0	0	0	0	0	0	0	0	0	0	0
BMPR1B-DT	0.162355	0.129238	0.0907908	0	0	0	0	0	0	0	0	0	0	0	0	0	0	0	0	0	0.115815	0	0	0	0	0	0	0	0	0.145026	0	0	0	0	0	0	0	0	0	0	0	0.116056	0	0	0	0	0	0	0
LINC02267	0	0	0	0	0	0	0	0	0	0	0	0	0	0	0	0	0	0	0	0	0	0	0	0	0	0	0	0	0	0	0	0	0	0	0	0	0	0	0	0	0	0	0	0	0	0	0	0	0
AC108515.1	0	0	0	0	0	0	0	0	0	0	0	0	0	0	0	0	0	0	0	0	0	0	0	0	0	0	0	0	0	0	0	0	0	0	0	0	0	0	0	0	0	0	0	0	0	0	0	0	0
AC019131.2	0.3164	0.370365	0.564612	0.353331	0.629741	0.584295	0.299933	0.419196	0.394804	0.619757	0.444027	0.636086	0.33273	0.16296	0.383635	0.637007	0.367647	0.322057	0.186089	0.433497	0.562504	0.711273	0.315492	0.592736	0.473486	0.337907	0.597035	0.424797	0.902277	0.0877553	0.397986	0.243376	0.460164	0.629741	0.727251	0.844363	0.5876	0.438092	0.408389	0.355765	0.616453	0.464806	0.281781	0.310471	0.481333	0.397986	0.522433	0.364275	0.218791
AC098487.1	0.255892	0.0996123	0.506061	0.299172	0.137099	0.188935	0.605412	0.241908	0.377672	0.687021	0.707402	0.27046	0.102666	0.558097	0.559596	0.567303	0.647428	0.322057	0.066968	0.152547	0.354657	0.419196	0.461272	0.216963	0.224402	0.771518	0	1.08879	0.659484	0.115687	0.424797	0.771518	0.472661	0.888913	0.760581	0.248543	0.657701	0.292212	0.213413	0.418347	0.778503	0.515058	1.16388	0.336324	0.335028	0.429413	0.336657	0.31745	0.463406
AC105460.1	0	0	0	0	0	0	0	0	0	0	0	0	0	0	0	0	0	0	0	0	0	0	0	0	0	0	0	0	0	0	0	0	0	0	0	0	0	0	0	0	0	0	0	0	0	0	0	0	0
LINC02503	0	0	0	0	0.0996802	0	0	0	0	0	0	0	0	0	0	0	0	0	0	0	0	0	0	0	0	0	0	0	0.095252	0	0	0	0	0	0	0	0	0	0	0	0	0	0	0	0	0	0	0	0
AC004063.1	0	0	0	0	0	0	0	0	0	0	0	0	0	0	0	0	0	0	0	0	0	0	0	0	0	0	0	0	0	0	0	0	0	0	0	0	0	0	0	0	0	0	0	0	0	0	0	0	0
AC004053.1	0	0	0	0	0	0	0	0	0	0	0	0	0	0	0	0	0	0	0	0	0	0	0	0	0	0	0	0	0	0	0	0	0	0	0	0	0	0	0	0	0	0	0	0	0	0	0	0	0
AC096577.1	0	0	0	0	0	0	0	0	0	0	0	0	0	0	0	0	0	0	0	0	0	0	0	0	0	0	0	0	0	0	0	0	0	0	0	0	0	0	0	0	0	0	0	0	0	0	0	0	0
AC004069.1	0.363874	0	0.153165	0	0	0.170696	0	0	0.215716	0.214781	0	0	0	0.16296	0.229831	0	0.133206	0.147819	0.284987	0	0.354657	0.3581	0	0.0983859	0	0.195162	0.458035	0.26567	0	0	0.100939	0	0	0	0	0	0	0.3164	0.132626	0	0	0	0	0.0958273	0	0	0	0.364275	0
LINC02173	0	0	0	0	0	0	0	0	0	0	0	0	0	0	0	0	0	0	0	0	0	0	0	0	0	0	0	0	0	0	0	0	0	0	0	0	0	0	0	0	0	0	0	0	0	0	0	0	0
RPL34-AS1	0.0735923	0	0.0561975	0.108305	0.117042	0.08151	0.184789	0.0737704	0.148781	0	0.122224	0.211772	0.130873	0.0826448	0.184421	0.219159	0.23264	0.181273	0.0849028	0.242136	0.0498668	0.249807	0.134235	0.064504	0.0721797	0.140425	0	0.0658188	0	0.130446	0.136637	0	0.0669142	0.139698	0.171139	0.145141	0	0.0996123	0.0647148	0.0544015	0	0.0523496	0	0.253153	0.0896522	0.214781	0.151652	0.0584458	0.069478
ZCCHC23	0.0580408	0	0	0	0	0.0678785	0	0	0	0	0	0.0794373	0	0.0300284	0	0	0	0	0	0	0	0.0731268	0	0	0	0.031098	0.0496398	0	0	0	0	0.0980296	0	0.0425379	0.0428617	0	0.0508555	0	0	0	0	0	0	0.0262927	0.102924	0	0	0	0
AC126283.1	0.478752	0.592736	0.442427	0.328991	0.474193	0	0.311183	0.241908	0.528473	0	0.237061	0	0	0.178919	0.673193	0.266918	0.424418	0	0	0	0.34213	0	0.735502	0	0	0	0.458035	0	0.528473	0	0.185142	0	0.460164	0.208386	0.371223	0.466424	0	0	0.229016	0.201814	0.880084	0.212783	0	0	0	0.504799	0	0	0
PANCR	0	0	0	0	0	0	0	0	0	0	0	0	0	0	0	0	0	0	0	0	0	0	0	0	0	0	0	0	0	0	0.136637	0	0	0	0	0	0	0	0	0	0	0	0	0	0	0	0	0	0
LINC01438	0	0	0	0	0	0	0	0	0	0	0	0	0	0	0	0	0	0	0	0	0	0	0	0	0	0	0	0	0	0	0	0	0	0	0	0	0	0	0	0	0	0	0	0	0	0	0	0	0
AC139718.2	0	0	0	0	0	0	0	0	0	0	0	0	0	0	0	0	0	0	0	0	0	0	0	0	0	0	0	0	0	0	0	0	0	0	0	0	0	0	0	0	0	0	0	0	0	0	0	0	0
AC139718.1	0	0	0	0	0	0	0	0	0	0	0	0	0	0	0	0	0	0	0	0	0	0	0	0	0	0	0	0	0	0	0	0	0	0	0	0	0	0	0	0	0	0	0	0	0	0	0	0	0
AC004704.1	0	0	0	0	0	0	0	0	0	0	0	0	0	0	0	0	0	0	0	0	0	0	0	0	0	0	0	0	0	0	0	0	0	0	0	0	0	0	0	0	0	0	0	0	0	0	0	0	0
AC109347.2	0.514588	1.01354	0.732323	0.353331	0.947964	1.03569	1.22391	1.27826	0.978991	0.999623	1.13491	1.12185	1.81026	0.98244	0.977166	0.505417	1.42745	0.912229	1.2577	0.293349	2.05644	0.373688	1.09872	0.506705	0.947964	0.883043	0.503179	0.511016	0.824472	0.970361	1.50919	0.669574	0.499309	0.583516	0.851043	2.12151	0.706461	1.27568	1.19436	0.829722	0.952659	0.408839	0.751344	0.645668	0.762833	0.558097	1.26016	1.59976	0.917047
AC106892.1	0.555404	0	0.137369	0	2.09589	0.264267	0	0	0	0.327033	0.356126	0	0.899289	0.255284	0	0.219159	0.194214	0	0	0	0.48928	0.725204	0	0	0	0	0	0	0	0.201653	0	0	0	1.71646	3.50605	0	0.674054	0	0	0	1.3087	0	0	0	0	0	0.170979	0	0
LINC02262	0	0	0	0	0	0	0	0	0	0	0	0	0	0	0	0	0	0	0	0	0	0	0	0	0	0	0	0	0	0	0	0	0	0	0	0	0	0	0	0	0	0	0	0	0	0	0	0	0
LINC02263	0	0	0	0	0	0	0	0	0	0	0	0	0	0	0	0	0	0	0	0	0	0	0	0	0	0	0	0	0	0	0	0	0	0	0	0	0	0	0	0	0	0	0	0	0	0	0	0	0
LINC01378	0	0	0.026965	0	0	0	0	0	0	0	0	0	0	0	0	0	0	0.0570073	0	0	0	0	0	0	0.0479195	0	0	0	0	0	0	0	0.0475765	0	0.0353593	0.119758	0	0	0	0	0	0	0	0	0	0.0337191	0	0	0.0461531
LINC02264	0	0	0	0	0	0	0	0	0	0	0	0	0	0	0	0	0	0	0	0	0	0	0	0	0	0	0	0	0	0	0	0	0	0	0	0	0	0	0	0	0	0	0	0	0	0	0	0	0
AC093752.3	2.7678	2.69937	1.86554	2.53681	1.53407	2.51579	3.1409	1.79572	1.75349	2.27125	1.82991	1.28398	2.28732	2.67559	2.15717	3.10824	2.08926	1.79572	2.61062	1.65763	1.79155	1.64917	1.29211	1.91314	1.27826	1.82991	1.3087	2.0084	1.47406	1.79155	2.35747	2.29573	2.16443	1.28112	2.1715	2.55811	2.67559	2.84667	1.71646	1.10285	2.50603	2.12151	3.01452	2.25411	2.44713	2.18562	2.3217	1.6983	1.90117
AC093752.2	0.425956	0.119887	0.116846	0.634585	0	0.452689	0	0.499309	0	0.353712	0.511668	0.285853	0.528473	0.364676	0.823073	0.881563	0.168686	0.250508	0.322057	0	0	0.328666	0.277891	0.357678	0.289635	0.337907	0.294179	0.386174	0	0.481333	0.263065	0.264267	0.378048	0.195362	0.444027	0.670491	0	0.521828	0.338172	0.403936	0	0.172695	0.173244	0.277605	0.844363	0.348056	0.197508	0.344721	0.185432
LINC01365	0	0	0	0	0	0	0	0	0	0	0	0	0	0	0	0	0	0	0	0	0	0	0	0	0	0	0	0	0	0	0	0	0	0	0	0	0	0	0	0	0	0	0	0	0	0	0	0	0
LINC02502	0	0	0	0	0	0	0	0	0.0994543	0	0	0	0	0	0	0	0	0	0	0	0	0	0	0	0	0	0	0	0	0	0	0	0	0	0	0	0	0	0	0	0	0	0	0	0	0	0	0	0
AC097173.2	0	0	0	0	0	0.207007	0	0	0	0	0	0	0	0	0	0	0	0	0	0	0	0	0	0	0	0	0	0	0	0	0	0	0	0	0	0	0	0	0	0	0	0	0	0	0	0	0	0	0
AC025741.1	0	0	0.0907908	0	0	0	0	0	0	0	0	0	0	0	0	0	0	0	0	0	0	0	0	0	0	0	0	0.135283	0	0	0	0	0	0	0	0	0.126691	0	0	0	0	0	0	0	0	0	0	0	0
AC105254.1	0	0	0	0	0	0	0	0	0	0	0	0	0	0	0	0	0	0	0	0	0	0	0	0	0	0	0	0	0	0	0	0	0	0	0	0	0	0	0	0	0	0	0	0	0	0	0	0	0
AC093821.1	0	0	0	0	0	0	0	0	0	0	0	0	0	0	0	0	0	0	0	0	0	0	0	0	0	0.0973112	0	0	0	0	0	0	0	0	0	0	0	0	0	0	0	0	0	0	0	0	0	0	0
LINC02435	0	0	0.245663	0.311594	0	0	0	0.584295	0	0	0.107146	0.154765	0	0.142766	0.19968	0	0.104088	0.330099	0	0.259131	0.0990901	0	0.198802	0.165383	0.123	0.174187	0.118201	0	0	0.312462	0	0	0	0	0	0.404347	0.208618	0	0.310471	0.318715	0.154641	0.19989	0.114581	0.149118	0	0	0	0	0
LINC01091	0.246362	0.4055	0.37599	0.891823	0.2825	0.136828	0.329385	0.634585	0.0465857	0.339145	0.770349	0.389041	0.643943	0.413436	0.258128	0.686104	0.25397	0.31441	0.0849028	0.310169	0.219437	0.430896	0.449813	0.749235	0.401715	0.963809	0.443504	0.773835	0.495317	0.902277	0.461272	0.452689	0.640653	0.494781	0.382237	0.978991	0.495852	0.167156	0.629741	0.798692	0.562504	1.09081	0.19307	0.864722	0.917047	0.605412	0.541391	0.0584458	0.382717
AC096732.1	0	0	0	0	0	0	0	0	0	0	0	0	0	0	0	0	0	0	0	0	0	0	0	0	0	0	0	0	0	0	0	0	0	0	0	0	0	0	0	0	0	0	0	0	0	0	0	0	0
AC121154.1	0	0	0	0	0	0	0	0	0	0	0	0	0	0	0	0	0	0	0	0	0	0	0	0	0	0	0	0	0	0	0	0	0	0	0	0	0	0	0	0	0	0	0	0	0	0	0	0	0
LINC02379	0	0	0	0	0	0	0	0	0	0	0	0	0	0	0	0	0	0	0	0	0	0	0	0	0	0	0	0	0	0	0	0	0	0	0	0	0	0	0	0	0	0	0	0	0	0	0	0	0
AC096773.1	0	0	0	0	0	0	0	0	0	0.290394	0	0	0	0	0	0	0	0	0	0	0	0.1433	0	0	0	0	0	0	0	0	0.0790515	0	0	0	0	0	0.102299	0	0	0	0	0	0	0.0605955	0.444027	0	0	0	0.107398
AC093772.1	0	0.129238	0.0907908	0	0.156224	0	0	0	0	0	0	0	0	0	0	0	0	0	0.0849028	0	0	0.216963	0	0.0739641	0.157959	0	0	0	0	0	0.112134	0	0	0	0	0	0	0	0	0	0	0.116056	0	0.0958273	0	0.1433	0	0.155008	0
AC110609.1	0	0.348673	0.275007	0.463406	0	0	0	0.616453	0.297419	0	0.356126	0.402151	0.26533	0.262086	0	0	0	0.394318	0.262596	0	0	0	0	0.247842	0	0.288384	0	0	0	0	0	0	0	0	0	1.14797	0	0	0	0.512306	0.50418	0	0.418765	0	0	0.397986	0	0	0
AC078850.1	0	0.0395809	0.0561975	0.196086	0.0841812	0.207007	0.19477	0.302863	0.0465857	0.190196	0.394804	0	0.227163	0.0508555	0	0.0799794	0.168686	0.204551	0.0898529	0.152547	0.34213	0.289011	0.337316	0.046865	0.188935	0.0386052	0.667518	0.155404	0.44678	0.0877553	0.100939	1.13691	0.128965	0.139698	0.0617796	0	0.113783	0.361216	0.0541223	0.304254	0.266272	0.116056	0.478325	0.31908	0	0.15674	0.484975	0.821721	0.0570073
AC078850.2	0	0	0	0	0	0	0	0.170837	0	0	0	0	0	0	0	0	0	0	0.137522	0.326487	0.711273	0	0	0	0.157959	0	0	0	0.182563	0	0	0	0	0	0.12744	0	0	0	0	0.128965	0	0.130815	0	0.104715	0	0.15674	0.452689	0	0
JADRR	0	0	0	0	0	0	0	0	0	0	0	0	0	0	0	0	0	0	0	0	0	0	0	0	0	0	0	0	0	0	0	0	0	0	0	0	0	0	0	0	0	0	0	0	0	0	0	0	0
LINC02466	0	0	0	0	0	0	0	0	0	0	0	0	0.0299527	0	0	0	0	0	0	0	0	0	0	0	0	0	0	0	0	0	0	0	0	0	0	0	0	0	0	0	0	0	0	0	0	0	0	0	0
LINC02465	0	0	0	0	0	0	0	0	0	0	0	0	0	0	0	0	0	0	0	0	0	0	0	0	0	0	0	0	0	0	0	0	0	0	0	0	0	0	0	0	0	0	0	0	0	0	0	0	0
LINC02479	0	0	0	0	0	0	0	0	0	0	0	0	0	0	0	0	0	0	0	0	0	0	0	0	0	0	0	0	0	0	0	0	0	0	0	0	0	0	0	0	0	0	0	0	0	0	0	0	0
AC093831.1	0	0	0	0	0	0	0	0	0	0	0	0	0	0	0	0	0	0	0	0	0	0	0	0	0	0	0	0	0	0	0	0	0	0.153295	0	0	0	0	0	0	0	0	0	0	0	0	0	0	0
LINC02377	0	0	0	0	0	0	0	0	0	0	0	0	0	0	0	0	0	0	0	0	0	0	0	0	0	0	0	0	0	0	0	0	0	0	0	0	0	0	0	0	0	0	0	0	0	0	0	0	0
SNHG27	0	0	0	0	0.117042	0	0	0	0	0	0	0	0	0.0508555	0	0	0	0.114988	0	0	0	0	0	0	0	0	0	0.155404	0	0	0	0	0	0	0	0	0	0	0.148561	0	0	0	0	0	0	0	0	0	0
AC096711.2	0	0	0	0.252688	0	0	0.213944	0.186089	0	0	0	0	0.130873	0.115138	0	0.315215	0	0.194046	0	0	0	0	0	0	0	0	0	0	0	0	0.126915	0.229831	0	0	0.138051	0	0	0.226969	0	0	0	0.268886	0	0	0	0	0	0	0
AC096711.1	0	0	0	0	0	0	0	0	0	0	0	0	0	0.19477	0	0	0	0	0	0	0	0	0	0	0	0	0	0	0	0	0.20681	0	0	0	0	0	0	0	0	0.394804	0	0	0	0	0	0	0	0	0
AC114741.1	0	0	0	0	0	0	0	0	0	0	0	0	0	0	0	0	0	0	0	0	0	0	0	0	0	0	0	0	0	0	0	0	0	0	0	0	0	0	0	0	0	0	0	0	0	0	0	0	0
LINC01256	0	0	0	0	0	0	0	0	0	0	0	0	0	0	0	0	0	0	0	0	0	0	0	0	0	0	0	0	0	0	0	0	0	0	0	0	0	0	0	0	0	0	0	0	0	0	0	0	0
AC115622.1	0	0	0	0	0	0	0	0	0	0	0	0	0	0	0	0	0	0	0	0	0	0	0	0	0	0	0	0	0	0	0	0	0	0	0	0	0	0	0	0	0	0	0	0	0	0	0	0	0
AC105383.1	0	0.0730557	0.0353593	0	0.0538441	0	0	0	0.0388806	0	0	0	0	0	0	0	0	0	0	0	0	0	0.0991511	0	0	0	0	0	0	0	0	0	0	0	0	0	0	0	0	0.036151	0	0.035029	0	0.0230708	0	0.0337191	0	0	0
AC079380.1	0	0.0907908	0	0	0	0	0	0	0	0	0	0	0	0	0	0	0	0	0	0	0	0	0	0	0	0	0	0	0	0	0	0	0	0	0	0	0	0	0	0	0	0	0	0	0	0	0	0	0
AC109830.1	0	0	0	0	0	0	0	0	0	0	0	0	0	0	0	0	0	0	0	0	0	0	0	0	0	0	0	0	0	0	0	0	0	0	0	0	0	0	0	0	0	0	0	0	0	0	0	0	0
LINC02462	0	0	0	0	0	0	0	0	0	0	0	0	0	0	0	0	0	0	0	0	0	0	0	0	0	0	0	0	0	0	0	0	0	0	0	0	0	0	0	0	0	0	0	0	0	0	0	0	0
AC093722.1	0	0	0	0	0	0	0	0	0	0	0	0	0	0	0	0	0	0	0	0	0	0	0	0	0	0	0	0	0	0	0	0	0	0	0	0	0	0	0	0	0	0	0	0	0	0	0	0	0
AC104619.2	0	0	0	0	0	0	0	0	0	0	0	0	0	0	0	0	0	0	0	0	0	0	0	0	0	0	0	0	0	0	0	0	0	0	0	0	0	0	0	0	0	0	0	0	0	0	0	0	0
AC107463.1	0	0	0	0	0	0	0	0	0	0	0	0	0	0	0	0	0	0	0	0	0	0	0	0	0	0	0	0	0	0	0	0	0	0	0	0	0	0	0	0	0	0	0	0	0	0	0	0	0
LINC02485	0	0	0	0	0	0	0	0	0	0	0	0	0	0	0	0	0	0	0	0	0	0	0	0	0	0.0566978	0	0	0	0	0	0	0	0	0	0	0	0	0	0	0	0	0	0	0	0	0	0	0
AC105362.1	0	0	0	0	0	0	0	0	0	0	0	0	0	0	0	0	0	0	0	0	0	0	0	0	0	0	0	0	0	0	0	0	0	0	0	0	0	0	0	0	0	0	0	0	0	0	0	0	0
AC073429.2	0	0	0.0303587	0	0	0	0	0	0	0	0	0	0	0	0	0	0	0.0667603	0	0	0	0	0	0	0	0	0	0	0	0	0	0	0	0	0	0	0	0	0	0	0	0	0	0	0	0	0.0437526	0	0
AC018680.1	0	0	0	0	0	0	0	0	0	0	0	0	0	0	0	0	0	0	0	0	0	0	0	0	0	0	0	0	0	0	0	0	0	0	0	0	0	0	0	0	0	0	0	0	0	0	0	0	0
AC073429.1	0	0	0	0	0	0	0	0	0	0	0	0	0	0	0	0	0	0	0	0	0	0	0	0	0	0	0	0	0	0	0	0	0	0	0	0	0	0	0	0	0	0	0	0	0	0	0	0	0
LINC02511	0	0	0	0.099212	0	0	0	0	0	0	0	0	0	0	0	0	0	0	0	0	0	0.105362	0	0	0	0	0	0	0	0	0	0	0	0	0	0	0	0	0	0	0	0	0	0	0	0	0	0	0
LINC02510	0	0	0	0	0	0	0	0	0	0	0	0	0	0	0	0	0	0	0	0	0	0	0	0	0	0	0	0	0	0	0	0	0	0	0	0	0	0	0	0	0	0	0	0	0	0	0	0	0
LINC02172	0	0	0	0	0	0.08151	0.0759626	0	0	0	0	0	0	0.0227751	0	0.0614331	0	0.0570073	0.0456669	0	0	0	0	0	0	0	0	0	0	0	0	0	0	0	0	0	0	0	0	0.036151	0	0	0	0.0308068	0	0	0	0	0
AC116563.1	0	0	0.144781	0	0	0	0	0	0	0	0	0	0	0	0	0	0	0	0	0	0	0	0	0	0	0	0	0	0	0	0	0	0	0	0	0	0	0	0	0	0	0	0	0.140733	0	0	0	0	0.232873
AC131956.2	0	0	0	0	0	0	0	0	0	0	0	0	0	0	0	0	0	0	0	0	0.115815	0	0	0	0	0	0	0	0	0	0	0	0	0	0	0	0	0	0	0	0	0	0	0	0	0	0	0	0
AC131956.1	0	0	0	0	0	0	0	0	0	0	0	0	0	0	0	0	0	0	0	0	0	0	0	0	0	0	0	0	0	0	0	0	0	0	0	0	0	0	0	0	0	0	0	0	0	0	0	0	0
LINC00616	0.0580408	0.234604	0.0996123	0	0	0	0	0	0.064601	0.136141	0.0391027	0	0	0.0420811	0.42848	0	0	0.538104	0	0.171898	0.038132	0.0946503	0.214396	0.0333572	0	0.031098	0	0	0.0660083	0.074768	0.0328534	0	0.0565176	0	0	0	0.0508555	0	0	0	0.20901	0.0429953	0	0	0	0.0416868	0	0.0695902	0
AC093903.1	0	0	0	0	0	0	0	0	0	0	0.188761	0.252474	0	0	0	0	0	0	0	0	0	0	0	0	0	0	0	0	0	0	0	0	0	0	0	0	0	0	0	0	0	0	0	0.132491	0	0	0	0	0
LINC00498	0	0	0	0	0	0	0	0	0	0	0	0	0	0	0	0.178099	0	0	0	0	0	0	0	0	0	0	0.181119	0	0	0	0	0	0	0	0	0	0	0	0	0.142766	0	0	0	0	0	0	0	0	0
LINC00499	0	0	0	0	0	0	0	0	0	0	0	0	0	0	0	0	0	0	0	0	0	0	0	0	0	0	0	0	0	0	0	0	0	0	0	0	0	0	0.116386	0	0	0	0	0	0	0	0	0	0
LINC00500	0	0	0	0	0	0	0	0	0	0	0	0	0	0	0	0	0	0	0	0	0	0	0	0	0	0	0	0	0	0	0	0	0	0	0	0	0	0	0	0	0	0	0	0	0	0	0	0	0
AC098859.2	0	0	0	0	0	0	0	0	0	0	0	0	0	0	0	0	0	0	0	0	0	0	0	0	0	0	0	0	0	0	0	0	0	0	0	0	0	0	0	0	0	0	0	0	0	0	0	0	0
AC093766.1	0	0	0	0	0	0	0	0	0	0	0	0	0	0	0	0.0799794	0	0	0	0	0	0	0	0	0	0	0	0.0821694	0	0	0	0	0	0	0	0	0	0	0	0	0	0	0	0	0	0	0	0	0
AC109927.2	0	0	0	0	0	0	0	0	0	0	0	0	0	0	0	0	0	0	0	0	0	0	0	0	0	0	0	0	0	0	0	0	0	0	0	0	0	0	0	0	0	0	0	0	0	0	0	0	0
AC112236.1	0	0.0565523	0.0907908	0.223807	0	0.08151	0	0.0737704	0	0	0	0	0	0	0	0	0	0.0756927	0	0.0840091	0	0	0	0	0	0	0.0607777	0.105298	0	0	0	0	0.0765726	0	0.0521681	0	0	0	0.0647148	0.0544015	0.096723	0	0	0	0	0	0.0824789	0	0
AC107220.1	0	0.0565523	0	0	0	0	0	0	0	0	0	0	0	0	0	0	0	0	0	0	0	0	0	0	0	0	0	0	0	0	0	0	0	0	0	0	0	0	0	0	0	0	0	0	0	0	0	0	0
LINC02432	2.03231	1.1435	3.10824	3.07546	4.14837	1.93061	3.31792	4.55173	2.3217	2.65363	3.35397	4.09222	2.37393	2.92872	2.95467	4.33931	3.38983	2.7678	2.08263	3.33594	4.14837	3.63119	3.10824	1.57582	3.17555	1.95873	3.46468	3.92243	2.39111	2.27125	2.42791	5.95825	3.2096	2.79329	3.42641	4.71706	3.46468	5.30801	3.92243	2.63113	2.58798	3.38983	4.09222	3.2096	4.03586	2.79329	3.58608	7.90326	3.86866
LINC02276	0	0	0	0	0	0	0	0	0	0	0	0	0	0	0	0	0	0	0	0	0	0	0	0	0	0	0	0	0	0	0	0	0	0	0	0	0	0	0	0	0	0	0	0	0	0	0	0	0
AC139720.2	0	0	0	0	0	0	0	0	0	0	0	0	0	0	0	0	0	0	0	0	0	0	0	0	0	0	0	0	0	0	0	0	0	0	0	0	0	0	0	0	0	0	0	0	0	0	0	0	0
AC139720.1	0.162355	0	0	0	0	0	0	0	0	0	0	0	0	0	0	0	0.244208	0	0	0	0	0	0	0.0983859	0	0	0	0	0	0.145026	0.200299	0	0	0	0	0	0	0	0	0	0	0	0.15303	0	0	0	0	0.155008	0
AC097658.2	0	0	0	0	0	0	0	0	0	0	0	0	0	0	0	0	0	0	0	0	0	0	0	0	0	0	0	0	0	0	0	0	0	0	0	0	0	0	0	0	0	0	0	0	0	0	0	0	0.121149
AC106871.1	0	0	0	0	0	0	0	0	0	0	0	0	0	0	0	0	0	0	0	0	0	0	0	0	0	0	0	0	0	0	0	0	0	0	0	0	0	0	0	0	0	0	0	0	0	0	0	0	0
AC109811.1	0	0	0	0.0890443	0	0	0	0	0	0	0	0	0	0	0	0	0	0	0	0	0.038132	0	0	0	0	0.031098	0.0406721	0	0	0	0	0	0	0	0	0	0	0	0	0	0	0	0	0	0	0	0	0	0
LINC02266	0	0	0.0809582	0	0	0	0	0.273354	0	0.157055	0.0608666	0	0.0451138	0.0826448	0	0	0	0	0	0.0840091	0.0498668	0.0946503	0	0.108409	0.0721797	0	0.0607777	0	0	0.102015	0	0	0	0	0	0	0	0	0.0647148	0.318715	0.182749	0.0523496	0.0944701	0.0958273	0	0	0	0	0.155681
AC108206.1	0	0	0	0	0	0	0	0.0500885	0	0	0	0	0	0	0	0	0	0	0	0	0	0	0	0	0.0479195	0	0	0.0442621	0	0	0	0	0	0	0	0	0	0	0	0	0	0	0	0.0230708	0	0.0337191	0	0.0584458	0
LINC01095	0	0.0395809	0	0	0	0	0	0	0	0	0	0	0	0	0	0	0	0	0	0	0	0	0	0.0333572	0	0	0	0	0	0	0	0	0	0	0	0	0	0	0	0	0	0	0	0	0	0.0416868	0	0	0
AC092435.1	0	0	0	0	0	0	0	0	0	0	0	0	0	0	0	0	0	0	0	0	0	0	0	0	0	0	0	0	0	0	0	0	0	0	0	0	0	0	0	0	0	0	0	0	0	0	0	0	0
AC092435.3	0	0	0	0	0	0	0	0	0	0	0	0	0	0	0	0	0	0	0	0	0	0	0	0	0	0	0	0	0	0	0	0	0	0	0	0	0	0	0	0	0	0	0	0	0	0	0	0	0
LINC02507	0	0	0	0	0	0	0	0	0	0	0	0	0	0	0	0	0	0	0.0502827	0	0	0	0.134235	0	0	0	0	0	0	0	0	0	0	0	0	0	0	0	0	0	0	0	0	0	0	0	0	0	0
AC108935.1	0	0	0	0	0	0	0	0	0	0	0	0	0	0	0	0	0.133206	0	0	0	0	0	0	0	0	0	0	0	0	0	0	0	0	0	0	0	0.138884	0	0	0	0.196926	0	0	0	0	0	0	0	0
AC108156.1	0	0	0	0	0	0	0	0	0	0	0.257603	0	0	0	0	0	0	0	0	0	0	0	0	0	0	0.337907	0	0	0	0	0	0.205824	0.161708	0	0	0	0.149829	0	0	0	0	0	0	0	0	0	0	0	0
LINC02430	0	0	0	0	0	0	0	0	0	0	0	0	0	0	0	0	0	0	0	0	0	0	0	0	0	0	0	0	0	0	0	0	0	0	0	0	0	0	0	0	0	0	0	0	0	0	0	0	0
LINC02355	0	0	0	0	0	0	0	0	0	0	0	0	0	0	0	0	0	0	0	0	0.038132	0	0	0	0	0	0	0	0	0	0	0	0	0	0	0	0	0	0.0541223	0	0	0	0	0	0	0	0	0	0
AC093893.1	0	0	0	0	0	0	0	0	0	0	0	0	0	0	0	0	0	0	0	0	0	0	0	0	0	0	0	0	0	0	0	0	0	0	0	0	0	0	0	0	0	0	0	0	0	0	0	0	0
AC105343.1	0	0	0	0	0	0	0	0	0	0	0	0	0	0	0	0	0	0	0	0	0	0	0	0	0	0	0	0	0	0	0	0	0	0	0	0	0	0	0	0	0	0	0	0	0	0	0	0	0
AC104819.3	0.266534	0	0.0809582	0.196086	0.555986	0.452689	0.299933	0.454111	0.297419	0.378776	0	0.537291	0.102666	0	0	0	0.23264	0	0.159712	0.152547	0.274375	0.178386	0	0.333465	0	0.518755	0.346259	0.363874	0.156336	0.452689	0.263065	0.438092	0.354184	0.735502	0.290983	0.752414	0.126691	0.568656	0.132626	0.190961	0	0.116056	0	0.0844284	0.219716	0.261859	0.389041	0.364275	0.276182
FAM160A1-DT	0.284526	0	0	0	0.2825	0.338794	0	0	0	0	0	0	0.528473	0	0	0.277149	0.244208	0	0	0	0	0	0	0	0	0.83093	0	0	0.303793	0.466937	0	0.903833	0.472661	0.387001	0	0	0.469207	0	0.243376	0.201814	0	0.381041	0	0	0.401715	0	0.398407	0.259131	0
AC107074.1	0	0	0	0	0	0	0	0	0	0	0	0	0	0	0	0	0	0	0	0	0	0	0	0	0	0	0	0	0	0	0	0	0	0	0	0	0	0	0	0	0	0	0	0	0	0	0	0	0
AC112242.1	0	0	0	0	0	0	0	0	0	0	0	0	0	0	0	0	0	0	0	0	0	0	0	0	0	0	0	0	0	0	0	0	0	0	0	0	0	0	0	0	0	0	0	0	0	0	0	0	0
AC097375.2	0	0	0	0	0	0	0	0	0	0	0	0	0	0	0	0	0	0	0	0	0	0	0	0	0	0	0	0	0	0	0	0	0	0	0	0	0	0	0	0	0	0	0	0	0	0.113856	0	0	0.121149
AC097375.1	0	0	0	0	0	0	0	0	0	0	0	0	0	0	0	0	0	0	0	0	0	0	0	0	0	0	0	0	0	0	0	0	0	0	0	0	0	0	0	0	0	0	0	0	0	0	0	0	0
LINC02273	0	0.0825679	0	0	0	0	0	0.0618092	0	0	0.0502059	0	0	0.136141	0	0	0.0810574	0	0	0	0.0721797	0	0	0.0552087	0.108513	0.125759	0	0	0	0	0.052302	0	0.0987503	0	0	0	0	0	0	0.0451138	0.115602	0.130815	0	0.0262927	0	0.0416868	0	0	0.0941273
AC079340.1	0	0	0	0	0	0	0	0	0	0	0	0	0	0.0707	0	0	0	0	0	0	0	0	0	0	0	0	0	0	0	0	0	0	0	0	0	0	0	0	0	0	0	0	0	0	0	0	0	0	0.139955
AC079340.2	0	0	0	0	0	0.188935	0	0	0	0	0	0	0	0	0	0	0.168686	0	0	0	0.146946	0.249807	0	0	0	0	0	0	0.208851	0	0	0	0	0	0	0	0	0.19968	0	0.117218	0	0	0	0	0	0	0.271455	0	0.185432
AC080078.1	0	0	0	0	0	0	0	0	0	0	0	0	0	0	0	0.219159	0	0	0	0	0	0	0	0	0	0.154124	0	0	0	0.374185	0	0	0	0	0	0	0	0	0.186481	0.167397	0	0	0	0.132491	0	0	0	0.213944	0.218791
AC080078.2	0	0	0	0	0	0.207007	0	0	0	0	0.150203	0	0.130873	0	0.285621	0	0	0.181273	0	0	0	0	0	0	0	0	0.181119	0	0	0	0	0	0	0.264915	0	0.3164	0	0.226969	0	0.128965	0.395289	0	0	0.115371	0.267469	0	0.151652	0.170445	0
AC093599.1	0	0	0	0	0	0	0	0	0	0	0	0	0	0	0	0	0	0	0	0	0	0	0	0	0	0	0	0	0	0	0	0	0	0	0	0	0	0	0	0	0	0	0	0	0	0	0	0	0
AC097467.1	0	0	0	0	0	0	0	0	0	0	0	0	0	0	0	0	0	0	0	0	0	0	0	0	0	0	0	0	0	0	0	0	0	0	0	0	0	0	0	0	0	0	0	0	0	0	0	0	0
AC107208.1	0	0	0	0	0	0	0	0	0	0	0	0	0	0	0	0	0	0	0	0	0	0	0	0	0	0	0	0	0	0	0	0	0.142431	0	0	0	0	0	0	0	0	0	0	0	0	0	0	0	0
AC096736.3	0	0	0	0	0	0	0	0	0	0	0	0	0	0	0	0	0	0	0	0	0	0	0	0	0	0	0	0	0	0	0	0	0	0.0615802	0	0	0	0	0	0	0	0	0	0	0	0	0	0	0
LINC02272	0	0	0	0	0	0	0	0	0	0	0	0	0	0	0	0	0	0	0	0	0	0	0	0	0	0	0	0	0	0	0	0	0	0	0	0	0	0	0	0	0	0	0	0	0	0	0	0	0
AC096736.1	0	0	0	0	0	0	0	0	0	0	0	0	0	0	0	0	0	0	0	0	0	0	0	0	0	0	0	0	0	0	0	0	0	0	0	0	0	0	0	0	0	0	0	0	0	0	0	0	0
LINC02433	0.0826448	0	0	0	0	0	0	0	0	0	0	0	0	0	0	0	0	0	0	0.0840091	0	0	0.134235	0	0	0	0	0	0	0	0	0	0	0	0	0	0	0	0.0647148	0.0544015	0	0	0	0.0605955	0	0	0	0	0
AC093817.1	0.102862	0	0	0	0	0	0	0	0	0.136141	0.0711879	0	0	0	0	0.0799794	0	0	0.0553528	0	0	0	0	0	0.0841812	0	0	0	0	0	0	0	0	0.0734772	0	0	0.0817826	0.19968	0	0	0	0	0	0	0	0	0	0	0
AC074344.2	0	0	0	0	0	0	0	0	0	0	0	0	0	0	0	0	0	0	0	0	0	0	0	0	0	0	0	0	0	0	0	0	0	0	0	0	0	0	0	0	0	0	0	0	0	0	0	0	0
LINC02477	0.40122	0.629741	0.338172	0.891823	0.369156	0.812003	0.379128	0.377232	0.631421	1.45356	0.177517	0.714133	0.76624	0.672301	0.415196	0.152772	0.881563	0.560328	0.257293	0.40122	0.0498668	0.465841	0.250253	0.455492	0.975341	1.36242	0.148781	0.255284	0.156336	0.244765	0.23343	0.114581	0.546658	0.243559	0.732323	1.59545	0.402586	0.305519	0.761679	0.720098	0.600012	0.648297	0.418765	0.737517	0.844363	0.870111	0.271455	0.125263	0.399395
AC005150.1	0	0	0	0	0	0	0	0	0	0	0	0	0	0	0	0	0	0	0	0	0	0	0	0	0	0	0	0	0	0	0	0	0	0	0	0	0.102299	0	0	0	0	0	0	0	0	0	0.0953538	0	0
AC093788.1	1.17789	0.844363	1.01173	1.22634	1.27309	0.943058	1.71646	0.978991	1.44059	1.45356	1.40534	0.726227	1.13491	1.58753	1.18947	0.927177	1.41248	1.22391	0.817936	0.928783	1.4629	0.601646	0.832366	1.09507	1.51268	1.3837	0.82037	1.3087	0.999623	0.744918	1.64512	1.3087	0.900721	0.844363	1.07264	1.12185	0.536664	1.33083	1.17272	1.1684	1.10079	0.591943	1.24968	0.774983	1.758	0.588292	0.890368	1.75349	1.13491
LINC01179	0	0	0	0	0	0	0	0	0	0	0	0	0	0	0	0	0	0	0	0	0	0	0	0	0	0	0	0	0	0	0	0	0	0	0	0	0	0	0	0	0	0	0	0	0	0	0	0	0
AC097487.1	0	0.0639811	0	0	0.0841812	0	0	0.0737704	0.0730065	0	0.0608666	0	0	0	0	0	0	0	0	0	0	0	0	0	0	0.0464287	0	0	0	0	0.0895155	0	0	0.114837	0	0	0	0	0	0	0	0.101474	0	0	0	0	0	0	0.139955
LINC02275	0	0.0327141	0	0	0	0	0	0	0	0	0	0	0	0	0	0	0	0	0	0	0	0	0	0	0	0	0	0	0	0	0	0	0	0	0	0	0	0	0	0	0	0	0	0	0	0	0.0362386	0	0.0461531
LINC01612	0	0	0.190196	0	0.173082	0	0.204551	0.170837	0.25003	0	0.150203	0	0	0.104405	0	0.165961	0	0	0.190473	0	0.228665	0	0	0.117879	0	0	0.16439	0.166069	0.194214	0.156538	0.126915	0.218791	0	0	0.138051	0	0	0	0.161246	0.128965	0	0	0	0.104715	0	0	0	0	0
LINC02382	0	0	0	0	0	0	0	0	0	0	0	0	0	0.0601399	0	0	0	0	0	0	0	0	0	0	0	0	0	0	0	0	0	0	0	0.0996802	0	0	0	0	0	0	0	0	0	0	0	0	0	0	0.121149
LINC02504	0	0	0	0	0	0	0	0	0	0	0	0	0	0.0227751	0	0	0	0	0.0383504	0	0	0	0	0	0	0	0	0	0.0544015	0	0	0	0	0	0	0	0	0	0	0	0	0	0	0	0	0.0337191	0	0	0
LINC02174	0	0	0	0	0	0	0	0	0	0	0	0	0	0	0	0	0	0	0	0	0	0	0	0	0	0	0	0	0	0	0	0	0	0	0	0	0	0	0	0	0	0	0	0	0	0	0	0	0
AC074254.1	0	0	0	0	0	0	0	0	0	0	0	0	0	0	0	0	0	0	0	0	0	0	0	0	0	0	0	0	0	0	0	0	0	0	0	0	0	0	0	0	0	0	0	0	0	0	0	0	0
AC093849.1	0.0735923	0.0395809	0.0416362	0	0	0.0678785	0.108051	0.0500885	0.0465857	0	0.0502059	0	0	0.0227751	0.136733	0.0799794	0.0698812	0	0	0	0	0	0.0991511	0.0552087	0	0.031098	0.0607777	0.0658188	0.0771978	0.0502553	0.052302	0	0.0565176	0.0615802	0.0986464	0	0.0420575	0.136733	0	0.0451138	0	0.035029	0.0595464	0.0605955	0.102924	0.0738419	0.0607777	0.0584458	0
AC106895.1	0	0	0	0	0	0	0	0	0	0	0	0	0	0	0	0	0	0	0	0	0	0	0	0	0	0	0	0	0	0	0	0	0	0	0	0	0	0	0	0	0.115602	0	0	0	0	0	0	0	0.0941273
LINC02269	0	0	0	0	0	0	0	0	0	0	0	0	0	0	0	0	0	0	0	0	0	0	0	0	0	0	0	0	0	0	0	0	0	0	0	0	0	0	0	0	0	0	0	0	0	0	0	0	0
AC106895.2	0	0	0	0	0	0	0	0	0	0	0	0	0	0.0258953	0	0	0	0.0570073	0	0	0	0.0731268	0	0	0	0	0	0	0	0.074768	0.0328534	0	0	0	0	0	0	0	0	0	0	0.0429953	0	0.036151	0	0.0416868	0	0	0
LINC02268	0.0735923	0	0.240208	0.135816	0.222696	0.107146	0	0.0874334	0.347435	0	0.0502059	0	0.203494	0.0601399	0	0.0903218	0.282152	0.105125	0.516225	0.0703533	0.219437	0.0847062	0.122371	0.185666	0	0.0386052	0	0.0658188	0.0771978	0.130446	0.168112	0.0896522	0	0.289011	0	0	0.264267	0.0996123	0.186481	0.224267	0	0.130815	0.24003	0.302275	0.153667	0.300474	0.281123	0.125263	0.139955
AC012055.1	0	0	0.0561975	0	0	0	0	0	0.064601	0	0	0	0.0451138	0.0508555	0.116056	0.0614331	0.0925858	0	0	0	0	0	0	0	0	0	0.0934571	0	0	0	0.0455534	0	0	0.0515669	0.0521681	0	0.0916209	0	0.102299	0.0763144	0.0869166	0.0523496	0.0944701	0.0605955	0	0	0	0	0
AC012055.2	0	0	0	0	0	0	0	0	0	0	0	0	0	0	0	0	0	0	0	0	0	0	0	0	0	0	0	0	0	0	0	0	0	0	0	0	0	0	0	0	0	0	0	0	0	0	0	0	0
AC116616.1	0	0	0	0	0	0	0	0	0	0	0	0	0	0	0	0	0	0	0	0	0	0	0	0	0	0	0	0	0	0	0	0	0	0	0	0	0	0	0	0	0	0	0	0	0	0	0	0	0
AC095050.1	0	0	0	0	0	0	0	0	0	0	0	0	0	0	0	0	0	0	0	0	0	0	0	0	0	0	0	0	0	0	0	0	0	0	0	0	0	0	0	0	0	0	0	0	0	0	0	0	0
AC131094.1	0	0	0	0	0	0	0	0	0	0	0	0	0	0	0	0	0.143923	0	0	0	0	0	0	0	0	0	0	0	0	0	0	0	0	0	0	0	0	0	0	0	0	0	0	0	0	0	0	0	0
AC092673.1	0	0	0	0	0	0	0	0	0	0	0	0	0	0	0	0	0	0	0	0	0	0	0	0	0	0	0	0	0	0	0	0	0	0	0	0	0	0	0	0	0	0	0	0	0	0	0	0	0
LINC02509	0.112465	0	0	0	0	0	0	0	0	0	0	0	0	0	0	0	0	0	0	0	0	0	0	0	0	0	0	0	0	0	0	0	0	0	0	0	0	0	0	0	0	0	0	0	0	0	0	0	0
AC097518.1	0	0	0	0	0	0	0	0	0	0	0	0	0	0	0	0	0	0	0	0	0	0	0	0	0	0	0	0	0	0	0	0	0	0	0	0	0	0	0.186481	0	0	0	0	0	0	0	0	0	0
AC103879.1	0	0	0	0	0	0	0	0	0	0	0	0	0	0	0	0	0	0	0	0	0	0	0	0	0	0	0	0	0	0	0	0	0	0	0	0.978991	0	0	0	0	0.82037	0	0	0	0	0	0	0	0
LINC01098	0	0	0	0	0	0	0	0	0	0	0	0	0	0	0	0	0	0	0	0	0	0	0	0	0	0	0	0	0	0	0	0	0	0	0	0	0	0	0	0	0	0	0	0	0	0	0	0	0
LINC01099	0.3096	0.0730557	0.326158	0.411052	0.325559	0.107146	0	0.227542	0.138539	0.434018	0	0.521828	0.369156	0.142766	0.157055	0.285304	0.181428	0.105125	0.209169	0.483231	0.161578	0	0	0.290646	0.207205	0.0566978	0.0824789	0	0.241908	0.156538	0.247329	0.205824	0.0987503	0.231676	0.182921	0.670491	0.113783	0	0.350529	0.128965	0.736509	0	0.994765	0	0.267469	0.717008	0.260932	0.49647	0.312259
AC020551.1	0	0	0	0	0	0	0	0	0	0	0	0	0	0	0	0	0	0	0	0	0	0	0	0	0	0	0	0	0	0	0	0	0	0	0	0	0	0	0	0	0	0	0	0	0	0	0	0	0
AC104803.1	0	0	0	0	0	0	0	0	0	0	0	0	0	0	0	0	0	0	0	0	0	0	0	0	0	0	0	0	0	0	0	0	0	0	0	0	0	0	0	0	0	0	0	0	0	0	0	0	0
LINC00290	0	0	0	0	0	0	0	0	0	0	0	0	0	0	0	0	0	0	0	0	0	0	0	0	0	0	0	0	0	0	0	0	0	0	0	0	0	0	0	0	0	0	0	0	0	0	0	0	0
LINC02500	0	0	0	0	0	0	0	0	0	0	0	0	0	0	0	0	0	0	0	0	0	0	0	0	0	0	0	0	0	0	0	0	0	0	0	0	0	0	0	0	0	0	0	0	0	0	0	0	0
TEMN3-AS1	0	0	0	0	0	0	0	0	0	0	0	0	0	0	0	0	0	0	0	0	0	0	0	0	0	0	0	0	0	0	0	0	0	0	0	0	0	0	0	0	0	0	0	0	0	0	0	0	0
AC079766.1	0.363874	0.433497	0	0.478325	0	0.629741	0.417036	0	0.170027	0.303184	0.177517	0.232406	0.145262	0.126691	0.305903	0.20321	0.181428	0.663265	0	0.207007	0	0	0	0.137099	0.526528	0.274116	0	0	0.551606	0.343722	0.145484	0.452689	0.199298	0.423908	0.150114	0.35503	0.186224	0	0.338172	0.156112	0	0.420528	0.363498	0.243192	0.304023	0.187343	0.304254	0	0.807006
AC019193.3	0	0	0	0	0	0	0	0	0.119629	0	0	0	0	0.0707	0	0	0	0	0	0.40122	0	0	0	0	0.123	0	0	0	0	0	0	0	0	0	0	0.248543	0.126691	0	0	0	0.166878	0.101474	0	0.0844284	0	0	0.111051	0	0
AC019193.2	0.121548	0	0.125699	0	0.117042	0.136828	0	0	0	0.179222	0	0	0.0847062	0.240385	0	0	0.104088	0	0.066968	0.225009	0	0.1433	0	0.146026	0.108513	0	0	0.293096	0	0.115687	0.0790515	0	0	0	0	0.372761	0	0.151365	0.266011	0.0889081	0.144911	0.246214	0	0.0605955	0	0	0.170979	0	0
WWC2-AS2	0.188575	0.109872	0.235958	0.126056	0.173082	0.107146	0.108051	0.101316	0.109161	0.136141	0.188761	0.192026	0.145262	0.0508555	0.116056	0.114224	0.133206	0.114988	0.119087	0.0976288	0.161578	0.129456	0.122371	0.064504	0.096952	0.125759	0.118201	0.113642	0.130757	0.115687	0.0328534	0.105873	0.107684	0.0860821	0.161123	0.145141	0.102299	0.0996123	0.213413	0.0889081	0.105362	0.101474	0.183474	0.125109	0	0.052235	0.0362386	0.0932692	0.121149
AC107214.2	0.217589	0.607818	0.442427	0.812003	0.935147	0.570119	0.744918	0.377232	0.446302	1.07056	0.0947576	1.04735	0.369156	0.42758	0.184421	0.20321	0.600711	0.304023	0.487285	0.326487	0.52913	1.39882	0.573175	0.378776	0.458598	0.0813551	0.588984	0.83093	0.303793	0.435917	0.404347	0.452689	0.293349	0.583516	0.233039	0.876083	0.388224	0.550162	0.828515	0.678689	0.546658	0.708282	0.640653	0.731322	0.827192	0.413824	0.250763	0.443504	0.218791
LINC02363	0.131225	0.0825679	0.0643588	0.320776	0.296311	0.384845	0.126915	0.554821	0.25003	0.25426	0.276182	0.10704	0.394318	0.126691	0.169573	0.446302	0.400725	0.147819	0.327033	0.483231	0.241292	0.198081	0.198802	0.155135	0.272207	0.288384	0.304254	0.123129	0.208851	0.466937	0.136637	0.152237	0.245938	0.264915	0.371223	0.266272	0.208618	0.690903	0	0.512306	0.296696	0.268886	0.173244	0.420078	0.129713	0.654973	0.138884	0.225495	0.244208
LINC02362	0.151365	0.20052	0	0.117784	0.253687	0.107146	0.135988	0.0737704	0.119629	0.339145	0.417482	0	0.0558893	0.0300284	0.125818	0.256083	0.295672	0.114988	0.119087	0.130873	0.30107	0.1433	0.36645	0.0401039	0.389041	0.562504	0.16439	0.17654	0.095252	0.0502553	0.112134	0.30865	0.128965	0.0515669	0.0842421	0.172296	0.0817826	0.087163	0.19989	0.224267	0.339926	0.101474	0.049917	0.353331	0.17057	0.214781	0	0.236497	0.139955
LINC02427	0	0.129238	0	0	0	0.264267	0	0.101316	0	0.119319	0.137099	0.12273	0.0847062	0.0300284	0	0.114224	0.0810574	0.169467	0.242826	0.0840091	0.0610902	0	0	0.117879	0.108513	0	0.16439	0.0971508	0.105873	0	0	0.205824	0.161708	0.338483	0.0521681	0	0.388224	0.151365	0	0	0	0.0523496	0.104088	0.140733	0.17057	0.0976288	0	0.104843	0
LINC02365	0	0	0	0	0	0	0	0	0	0	0	0	0	0	0	0	0	0	0	0	0	0	0	0	0.108513	0	0	0	0	0	0	0	0	0	0	0	0	0	0	0	0	0	0	0	0	0	0	0	0
MIR3945HG	0.140425	0	0	0	0	0	0	0.101316	0	0	0.0831862	0	0	0	0	0	0	0	0.0898529	0	0	0.159604	0	0	0.172296	0	0.0934571	0	0	0.102015	0	0	0	0.0996802	0.182921	0	0	0.136733	0	0	0	0	0	0.072017	0	0	0.0704447	0.186895	0.0941273
LINC01093	0	0	0	0	0	0	0.144781	0	0	0	0	0.154765	0.0847062	0	0	0	0	0	0	0	0	0	0	0	0	0	0	0	0	0	0	0	0	0	0	0	0	0	0	0	0	0	0	0	0	0	0	0	0.121149
LINC02437	0	0	0	0	0	0	0	0	0	0	0	0	0	0	0	0	0	0	0	0	0	0.105362	0	0	0.0841812	0	0	0	0	0	0	0	0	0	0	0	0	0	0	0	0	0	0	0	0	0	0	0	0
LINC02436	0	0	0	0	0.0699922	0	0	0	0	0	0	0	0	0	0	0	0	0	0.0553528	0	0	0	0	0	0	0	0	0	0	0	0	0	0	0	0	0	0	0	0	0	0	0	0	0	0	0	0	0	0
AC096659.1	0	0	0	0	0	0	0	0	0	0	0	0	0	0	0	0	0	0	0	0	0	0	0	0	0	0	0	0	0	0	0	0	0	0	0	0	0	0	0	0	0	0	0	0	0	0	0	0	0
AC108865.2	0	0	0.125699	0	0	0	0	0	0	0	0	0	0	0.126691	0	0	0	0	0	0	0	0	0.315492	0	0	0	0	0	0	0	0	0	0	0	0	0	0	0	0	0	0	0	0	0	0	0	0	0	0
LINC02374	0	0	0	0	0	0	0	0	0	0	0	0	0	0	0	0	0	0	0	0	0	0	0	0	0	0	0	0	0	0	0	0	0	0	0	0	0	0	0	0	0	0	0	0	0	0	0	0	0
AC097652.1	0.112465	0	0.0643588	0	0	0	0	0	0	0	0	0	0	0.0300284	0.19968	0.0799794	0.0925858	0	0	0	0.115815	0	0	0	0	0	0	0	0	0.102015	0.0699367	0.0896522	0	0.0349649	0	0	0	0	0	0.036151	0.0869166	0.0523496	0	0	0	0.113856	0	0.125263	0
LINC02514	0	0	0	0	0	0	0	0	0	0	0	0	0	0	0	0	0	0	0	0	0	0	0	0	0	0	0	0	0	0	0	0	0	0	0	0	0	0	0	0	0	0	0	0	0	0	0	0	0
AC093763.1	0	0	0	0	0	0	0	0	0	0	0	0	0	0	0	0	0	0	0	0	0	0	0	0	0	0	0	0	0	0	0	0	0	0	0	0	0	0	0	0	0	0	0	0	0	0	0	0	0
LINC02492	0	0	0	0	0	0	0	0	0	0	0	0	0	0	0	0	0	0	0	0	0	0	0	0	0	0	0	0	0	0	0	0	0	0	0	0	0	0	0	0	0	0	0	0	0	0	0	0	0
LINC02434	0	0	0	0	0	0	0	0	0	0	0	0	0	0	0	0	0	0	0	0	0	0	0	0	0	0	0	0	0	0	0	0	0	0	0	0	0	0	0	0	0	0	0	0	0	0	0	0	0
LINC01060	0	0	0	0	0	0	0	0	0	0	0	0	0	0	0	0	0	0	0	0.113929	0	0.129456	0.0991511	0	0.25426	0	0	0	0	0	0	0.0675734	0	0	0	0	0	0	0	0	0	0	0	0	0	0	0	0	0
AC093909.2	0	0	0	0	0	0	0	0	0	0	0	0	0	0	0	0	0	0	0	0	0	0	0	0	0	0	0	0	0	0	0	0	0	0	0	0	0	0	0	0	0	0	0	0	0	0	0	0	0
LINC02508	0	0	0	0	0	0	0	0	0	0	0	0	0	0	0	0	0	0	0	0	0	0	0	0	0	0	0	0	0	0	0	0	0	0	0	0	0	0	0	0	0	0	0	0	0	0	0	0	0
AC093909.4	0	0	0	0	0	0	0	0	0	0	0	0	0.0299527	0	0	0	0	0	0.0456669	0	0	0	0	0	0	0	0	0	0	0	0	0	0	0	0	0	0	0	0	0	0	0	0	0	0	0.0416868	0	0	0
AC122138.1	0	0	0	0	0	0	0	0	0	0	0	0	0	0	0	0	0	0	0	0	0	0	0	0	0	0	0	0	0	0	0	0	0	0	0	0	0	0	0	0	0	0	0	0	0	0	0	0	0
AC107391.1	0	0	0	0	0	0	0	0	0	0	0	0	0	0	0	0	0	0	0	0	0	0	0	0	0	0	0	0	0	0	0	0	0	0	0	0	0	0	0	0	0	0	0	0	0	0	0	0	0
AC105924.1	0	0	0	0	0	0	0	0	0	0	0	0	0	0	0	0	0	0	0	0	0	0	0	0	0	0	0	0	0	0	0	0	0	0	0	0	0	0	0	0	0	0	0	0	0	0	0	0	0
LINC01262	0	0	0	0	0	0	0	0	0	0	0	0	0	0	0	0	0	0	0	0	0	0	0	0	0	0	0	0	0	0	0	0	0	0	0	0	0	0	0	0	0	0	0	0	0	0.0632845	0	0	0
AF250324.1	0	0	0	0.167542	0.296311	0	0	0.214589	0	0.179222	0	0	0.0847062	0.301421	0	0.114224	0.104088	0	0	0.130873	0.172695	0	0	0.216963	0	0.0813551	0	0	0	0	0	0	0	0.264915	0	0	0.495852	0.151365	0	0.465841	0.144911	0.0886302	0.114581	0.072017	0	0.605412	0	0.125263	0
FRG1-DT	0.334675	0.182921	0.196926	0.126056	0.222696	0.170696	0.241112	0.186089	0.36645	0.136141	0.122224	0.10704	0.909423	0.233204	0.463881	0.0799794	0.38741	0.237715	0.149278	0.0976288	0.198288	0.178386	0.290394	0.064504	0.123	0.244965	0.16439	0.146309	0.130757	0	0.284987	0.452689	0.0876759	0.127692	0.0521681	0.266272	0.252474	0.184948	0.186481	0.21128	0.182749	0.394804	0.281781	0.158984	0.465841	0.129128	0.161246	0	0.107398
LINC01596	0	0	0	0	0	0	0	0	0	0	0	0	0	0	0	0	0	0	0	0	0	0	0	0	0	0	0	0	0	0	0	0	0	0	0	0	0	0	0	0	0	0	0	0	0	0	0	0	0
DBET	0	0	0	0	0	0	0	0	0	0	0	0	0	0	0	0	0	0	0	0	0	0	0	0	0	0	0	0	0.0544015	0	0	0	0	0	0	0	0	0.0742301	0	0	0	0	0	0	0	0	0	0	0
AC122719.1	0	0	0	0	0	0	0	0	0.109161	0.201363	0	0.154765	0.102666	0	0	0	0	0	0	0	0	0	0	0	0	0	0.133364	0.123129	0	0	0	0	0	0	0	0	0.219951	0.167156	0	0	0	0	0.127008	0.0844284	0	0	0.111051	0	0.139955
AC122719.2	0	0	0	0	0	0.248333	0	0	0	0	0	0	0	0	0	0	0	0	0	0	0.161578	0	0	0	0	0	0	0	0	0	0	0	0	0	0	0	0	0	0	0	0	0	0	0	0	0	0	0	0
AC116351.2	0.179662	0.234604	0.160052	0.156897	0.0841812	0.280533	0.135988	0.0874334	0.189109	0.239765	0.107146	0.211772	0.215476	0.186602	0.136733	0.190196	0	0.114988	0.547393	0.130873	0.257293	0.396802	0.214396	0.19968	0.188935	0.174187	0.193661	0.0585187	0.170241	0.130446	0.118688	0.105873	0.161708	0.338483	0.279244	0.133206	0.174764	0.184948	0.0752674	0.224267	0	0.246214	0.23072	0.0262927	0.117308	0.187343	0.359215	0.281781	0.139955
AC091849.2	0.112465	0.209963	0	0.267469	0.381474	0.425567	0.311183	0.332029	0.394804	0.157055	0	0.341102	0.203494	0.301421	0.169573	0.324955	0.168686	0.276623	0.31321	0.293349	0.146946	0.129456	0.515058	0.774983	0.272207	0.32676	0.0934571	0.26567	0.687938	0.102015	0.306287	0.133048	0.53302	0.231676	0.832366	0.466424	0.59773	0	0.53302	0.318715	0.491085	0.222233	0.183474	0.459662	0.17057	0.261859	0.0824789	0.331694	0.350042
AC026412.3	0.140425	0.0996123	0.224267	0.180173	0.343247	0.152547	0.213944	0.214589	0.159497	0.190196	0.213199	0.10704	0.0699922	0.104405	0.214781	0.101116	0.143923	0.169467	0.322057	0.225009	0.131225	0.0847062	0.111051	0.176089	0.272207	0.140425	0	0.26567	0.0660083	0.130446	0.175923	0.218791	0.161708	0.0860821	0.0617796	0.335028	0.138884	0.259131	0.116386	0.117218	0.23264	0.101474	0.219951	0.104715	0.17057	0.1433	0.138884	0.225495	0.169185
AC112176.1	0	0	0	0	0	0	0	0	0	0	0	0	0	0	0	0	0	0	0	0	0	0	0	0	0	0	0	0	0	0	0	0	0	0	0	0	0	0	0	0	0	0	0	0	0	0	0	0	0
LINC02116	0	0	0	0	0	0	0	0	0	0	0	0	0	0	0	0	0	0	0	0	0	0	0	0	0	0	0	0	0	0	0	0	0	0	0	0	0	0	0	0	0	0	0	0	0	0.1433	0	0	0
AC126768.2	0.326158	0.0825679	0.0561975	0	0.173082	0.121716	0	0.156336	0.0899951	0	0.0831862	0.211772	0.117983	0.16296	0	0.0903218	0.0925858	0	0.133048	0	0.131225	0	0	0	0.172296	0	0.25455	0.155404	0.105873	0.273856	0.168112	0.123774	0	0.127692	0	0.434966	0	0	0.310471	0.304254	0.20901	0.0763144	0	0	0	0	0	0	0.185432
AC126768.1	0	0	0	0	0	0	0	0	0	0	0	0	0	0	0	0	0	0	0	0.171898	0	0	0	0.108409	0	0	0	0	0.316762	0	0	0	0	0.127692	0	0	0	0	0	0	0	0	0	0	0	0	0	0	0
AC126768.3	0	0	0	0	0	0	0	0	0	0	0	0.154765	0	0	0	0	0.118352	0	0	0	0	0	0	0	0	0	0	0	0	0	0	0	0	0	0	0	0	0	0	0	0	0	0	0.0844284	0	0	0	0	0
LSINCT5	0	0	0.026965	0	0	0	0	0	0	0	0	0.0661714	0.0299527	0.0258953	0.0985749	0	0	0	0	0	0.038132	0.0847062	0	0.046865	0	0.0464287	0	0	0	0	0	0	0.0669142	0	0	0	0	0	0	0.036151	0.0768486	0	0.0409732	0.0230708	0	0	0	0	0.0570073
AC094105.1	0	0	0	0	0	0	0	0	0	0	0	0	0	0	0	0	0	0	0	0	0	0	0	0	0	0	0	0	0	0	0	0	0	0	0	0	0	0	0	0	0	0	0	0	0	0	0	0	0
LINC01019	0	0	0	0	0	0	0	0	0	0	0.0502059	0	0	0	0	0	0	0	0	0.0557975	0	0	0	0	0	0.031098	0	0	0	0	0	0	0	0	0	0	0	0	0	0	0	0	0	0	0	0	0	0	0
LINC02162	0	0	0	0	0	0	0	0	0	0	0	0	0	0	0	0	0	0	0	0	0	0	0	0	0	0	0	0	0	0	0	0	0	0	0	0	0	0	0	0	0	0	0	0	0	0	0	0	0
LINC01017	0	0	0	0	0	0	0	0	0	0	0	0	0	0	0	0	0	0	0	0	0	0	0	0	0	0	0	0	0	0	0	0	0	0	0	0	0	0	0	0	0	0	0	0	0	0.0738419	0	0	0
AC025773.1	0	0	0	0	0	0	0	0	0	0	0	0	0	0	0	0	0	0	0	0	0	0	0	0	0	0	0	0	0	0	0	0	0	0	0	0	0	0	0	0	0	0	0	0	0	0	0	0	0
AC025187.1	0	0	0	0	0	0	0	0	0	0	0	0	0	0	0	0	0	0	0	0	0	0	0	0	0	0	0	0	0	0	0	0	0	0	0	0	0	0	0	0	0	0	0	0	0	0	0	0	0
LINC02063	0	0	0	0	0	0	0	0	0	0	0	0	0	0	0	0	0	0	0	0	0	0	0	0	0	0	0	0	0	0	0	0	0	0	0	0	0	0	0	0	0	0	0	0	0	0	0	0	0
AC106799.3	0	0	0	0	0	0	0	0	0	0	0	0	0	0	0	0	0	0	0	0	0	0	0	0	0	0	0	0	0	0	0	0	0	0	0	0	0	0	0	0	0	0	0	0	0	0	0	0	0
AC106799.2	0	0	0	0	0	0	0	0	0	0	0	0	0	0	0	0	0	0	0	0	0	0	0	0	0	0	0	0	0	0	0	0	0	0	0	0	0	0	0	0	0	0	0	0	0	0	0	0	0
AC106799.1	0	0	0	0	0	0	0	0	0	0	0	0	0	0	0	0	0	0	0	0	0	0	0	0	0	0	0	0	0	0	0	0	0	0	0	0	0	0	0	0	0	0	0	0	0	0	0	0	0
AC010634.1	0	0	0	0	0	0	0	0	0	0	0	0	0	0	0	0	0	0	0	0	0	0	0	0	0	0	0	0	0	0	0	0	0	0	0	0	0	0	0	0	0	0	0	0	0	0	0	0	0
LINC02114	0	0	0	0	0	0	0	0	0	0	0	0	0	0	0	0	0	0	0	0	0	0	0	0	0	0	0	0	0	0	0	0	0	0	0	0	0	0	0	0	0	0	0	0	0	0	0	0	0
AC026719.1	0	0	0	0	0	0	0	0	0	0	0	0	0	0	0	0	0	0	0	0	0	0	0	0	0	0	0	0	0	0	0	0	0	0	0	0	0	0	0	0	0	0	0	0	0	0	0	0	0
AC026415.1	0	0	0	0	0	0	0	0	0	0	0	0	0	0	0	0	0	0	0	0	0	0	0	0	0	0	0	0	0	0	0	0	0	0	0	0	0	0	0	0	0	0	0	0	0	0	0	0	0
AC010451.3	0	0	0	0	0	0	0	0	0	0	0	0	0	0	0	0	0	0	0	0	0	0	0	0	0	0	0	0	0	0	0	0	0	0	0	0	0	0	0	0	0	0	0	0	0	0	0	0	0
AC010451.1	0	0	0	0	0	0	0	0	0	0	0	0	0	0	0	0	0	0	0	0	0	0	0	0	0	0	0	0	0	0	0	0	0	0	0	0	0	0	0	0	0	0	0	0	0	0	0	0	0
LINC01020	0	0	0	0	0	0	0	0	0	0	0	0	0	0	0	0	0	0	0	0	0	0	0	0	0	0	0	0	0	0	0	0	0	0	0	0.372761	0	0	0	0	0	0	0	0	0	0	0	0	0
AC010451.2	0	0	0	0	0	0	0	0	0	0	0	0	0	0	0	0	0	0	0	0	0	0	0	0	0	0	0	0	0	0	0	0	0	0	0	0	0	0	0	0	0	0	0	0	0	0	0	0	0
LINC02121	0	0	0	0	0	0	0	0	0	0	0	0	0	0	0	0	0	0	0	0	0	0	0	0	0	0	0	0	0	0	0	0	0	0	0	0	0	0	0	0	0	0	0	0	0	0	0	0	0
AC010266.2	0.0735923	0.0327141	0.072017	0	0.0538441	0.0563907	0.0688976	0.0618092	0.0388806	0.11133	0.0502059	0.0661714	0.0847062	0	0.116056	0.0456669	0	0.0756927	0.0456669	0	0.0498668	0	0.111051	0.0293945	0	0	0.0824789	0.0442621	0.0544015	0.0502553	0	0.164238	0	0	0	0	0.113783	0.0996123	0.0752674	0	0.0584458	0	0.0595464	0.0230708	0	0.0844284	0.0953538	0	0.0570073
AC010266.1	0	0	0	0	0	0	0	0	0	0	0	0	0	0	0	0	0	0	0	0	0	0	0	0	0	0	0	0	0	0	0	0	0	0	0	0	0	0	0	0	0	0	0	0	0	0	0	0	0
LINC02145	0.847201	0.323983	0.808206	0.43958	0.506705	0.849766	0.320429	0.918509	0.556658	0.696544	0.213199	0.490544	0.780876	0.732323	1.26527	0.324955	0.400725	0.454111	0.34549	0.849766	0.47622	0.552354	0.746147	0.568656	0.632931	1.1435	1.09081	0.731322	0.770349	0.599313	0.602581	2.14991	0.26839	1.01712	0.551606	0.711273	0.771518	0.690903	0.772688	0.957345	1.01533	0.78211	1.16388	0.310471	1.3446	0.893261	1.09507	0.541391	0.580789
LINC01018	0.235312	0.0907908	0.267194	0.252688	0.190473	0.3214	0.352631	0.319829	0.403056	0.368002	0.417482	0.304867	0.227163	0.152237	0.305903	0.383198	0.194214	0.546658	0.154389	0.499979	0.331093	0.178386	0.315492	0.403525	0.376391	0.185432	0.346259	0.355765	0.62124	0.327374	0.118688	0.438092	0.153295	0.550858	0.115181	0.229304	0.783213	0.292212	0.229016	0.418347	0.462889	0.408839	0.905233	0.327033	0.129713	0.665101	0.348365	0.0932692	0.429875
LINC02102	0.0664163	0.0489065	0.116846	0.561816	0.137099	0.0678785	0.0688976	0.0618092	0.197508	0.0850772	0.0502059	0.353712	0.0699922	0.0352676	0.089104	0.0614331	0.0508082	0.0570073	0.0944701	0.0703533	0.038132	0.105362	0.0895155	0.0860821	0.0601399	0.465257	0.273856	0.210736	0	0.0625547	0.0699367	0.0602366	0.0669142	0.0515669	0.0723851	0.404347	0	0.087163	0.0428617	0.178386	0.0869166	0.184631	0.104088	0.036151	0.102924	0.0632845	0.0437526	0.0695902	0.0570073
AC122710.2	0	0	0.224267	0	0	0	0	0	0	0	0	0	0	0	0	0	0	0	0	0	0	0	0	0	0	0	0	0	0	0.130446	0	0	0	0	0	0	0	0	0	0	0	0	0	0.0844284	0	0	0	0	0
AC122710.1	0	0	0	0.180173	0	0	0	0	0	0	0	0	0	0	0	0	0	0	0	0	0	0	0	0	0	0	0.133364	0	0	0	0	0	0	0	0	0	0	0	0	0	0.166878	0	0	0	0	0	0	0	0
AC027343.3	0	0	0	0	0	0	0	0	0	0	0	0	0	0	0	0	0	0	0	0	0	0	0	0	0	0	0	0	0	0	0	0	0	0	0	0	0	0	0	0	0	0	0	0	0	0	0	0	0
LINC02123	0	0	0	0	0	0	0	0	0	0	0	0	0	0	0	0	0	0	0	0	0	0	0	0	0	0	0	0	0	0	0	0	0	0	0	0	0	0	0	0	0	0	0	0	0	0	0	0	0
LINC02142	0	0	0	0	0	0	0	0	0	0	0	0	0	0	0	0	0	0	0	0	0	0	0	0	0	0	0	0	0	0	0	0	0	0	0	0	0	0	0	0	0	0	0	0	0	0	0	0	0
AC025174.1	0	0	0	0	0	0	0	0	0	0	0	0	0	0	0	0	0	0	0	0	0	0	0	0	0	0	0	0	0	0	0	0	0	0	0	0	0	0	0	0	0	0	0	0	0	0	0	0	0
LINC02226	0	0	0	0	0	0	0	0	0	0	0	0	0	0	0	0	0.0508082	0	0	0.0976288	0	0	0	0	0	0	0	0	0	0	0.0328534	0	0	0	0	0	0	0	0	0	0	0	0	0	0	0	0	0	0
AC091965.1	0.235312	0	0.144781	0	0	0	0.258855	0.214589	0	0.575921	0.20052	0	0.304254	0	0.584295	0	0.816785	0	0.298871	0.433497	0	0	0.354184	0	0.238171	0.602581	0.396087	0	0.254765	0.213785	0	0.512306	0.404347	0.338483	0.325559	0.335028	0.695536	0	0	0.318715	0	0.591943	0	0	0	0.893261	0	0.225495	0.201814
MIR4458HG	2.11522	0.894699	1.67019	1.52044	1.78099	1.42102	1.90117	2.27125	1.35945	2.08263	1.7302	1.72105	1.44373	1.78627	2.08263	1.10285	2.52555	0.734412	1.52044	1.57967	1.97059	2.08263	1.98271	1.29211	2.81909	1.65321	2.52555	2.03804	2.40914	2.37393	2.0699	1.74412	2.14991	1.62732	2.0501	1.24968	1.39246	2.08263	1.919	1.47779	1.99507	1.91314	1.73944	0.874687	0.681271	1.91314	1.19188	1.78627	2.12151
AC027328.1	0	0	0	0	0	0	0	0	0	0	0	0	0	0	0	0	0	0	0	0	0	0	0	0	0	0	0	0	0	0	0	0	0	0	0	0	0	0	0	0	0	0	0	0	0	0	0	0	0
LINC02199	0	0	0	0	0	0	0	0	0	0	0	0	0	0	0	0	0	0	0	0	0	0	0	0	0	0	0	0	0	0	0	0	0	0	0	0	0	0	0	0	0	0	0	0.0230708	0	0.0337191	0	0	0
SEMA5A-AS1	0	0.0395809	0	0.099212	0	0	0	0	0	0	0.0608666	0	0	0	0	0	0	0	0	0	0	0.0731268	0	0	0	0	0	0	0	0	0.0328534	0	0	0	0	0	0	0	0	0	0	0	0	0	0	0	0.0437526	0	0
SNHG18	6.50407	4.47958	6.71068	6.30796	6.71068	6.9588	4.33931	5.67411	4.99909	8.32585	5.67411	7.53393	6.13743	6.13743	7.53393	5.54793	4.63035	4.26934	3.76285	6.9588	4.71706	6.50407	6.13743	4.89461	7.08558	7.53393	7.21236	5.81952	5.81952	6.9588	5.30801	4.7967	6.9588	7.21236	6.50407	7.53393	6.30796	5.42362	6.30796	8.80129	6.9588	6.9588	5.95825	5.81952	6.71068	5.95825	4.7967	4.47958	8.32585
LINC02221	0	0	0	0	0	0	0	0	0	0	0	0	0	0	0	0	0	0	0	0	0	0	0	0	0	0	0	0	0	0	0	0	0	0	0	0	0	0	0	0	0	0	0	0	0	0	0	0	0
AC034229.1	0	0	0	0	0	0	0	0	0	0	0	0	0	0.0707	0	0	0	0	0	0	0	0	0	0.046865	0	0	0.0710338	0	0	0	0.052302	0	0	0	0	0.158164	0	0	0	0	0	0	0	0	0	0	0	0	0
AC034229.2	0	0	0	0	0	0	0	0	0.138539	0	0	0	0	0	0	0	0	0	0	0	0	0	0	0	0	0	0	0	0	0.074768	0	0	0	0	0	0	0	0	0	0	0	0	0	0	0	0	0	0	0
AC034229.3	0.140425	0.0489065	0.0907908	0	0.253687	0.0937905	0.0922865	0.0500885	0	0.0935807	0.0711879	0.0929584	0.182234	0.136141	0.157055	0.101116	0.0698812	0.0844284	0.0502827	0	0.0721797	0.0731268	0.122371	0.108409	0.108513	0.0386052	0.0710338	0.20092	0.0544015	0	0.112134	0	0.0987503	0.0349649	0	0	0.113783	0.167156	0.132626	0.0653709	0.0869166	0.0763144	0.114581	0.0504427	0.153667	0.0337191	0.0824789	0.0584458	0.0941273
AC034229.4	0.35149	0.291848	0.21492	0.252688	0	0.228138	0.539558	0.468049	0.590325	0.662327	0.164238	0.232406	0.381855	0.50065	0.987799	0.190196	0.306655	0.639722	0.307328	0	0.60694	0	0	0.343722	0	0.140425	0.610906	0.187894	0.514588	0.327374	0.247329	0	0.472661	0.153295	0.279244	0	0.31908	0	0.458598	0.755853	0	0.394804	0.495852	0	0	0.365575	0.398407	0.331694	0.201814
AC012640.3	0	0	0.125699	0	0	0	0	0.20092	0	0	0	0	0	0	0	0	0	0	0	0	0	0	0	0	0	0	0	0	0	0.188388	0.145484	0	0	0	0.150114	0	0.186224	0	0	0	0	0.160747	0.202834	0	0	0	0	0	0.201814
AC092336.1	0.382717	0	0.240208	0.126056	0.0699922	0.59773	0.432977	1.02621	1.41785	0	1.81513	1.45018	0.277891	0.989509	0	0.663265	0.713166	0	1.90716	0.615046	0.631421	0.233204	0	1.06274	0.389041	0.288384	0.148781	1.44059	0.649158	1.48416	0.472183	0	0	0	0.474901	0.372761	0	0.259131	0.772688	0.318715	1.04342	1.88076	1.21599	1.1684	0	1.66205	0	0.443504	0.580789
LINC02212	0.179662	0.0639811	0.153165	0.196086	0.190473	0.188935	0.108051	0.519388	0.958887	0	0.817936	0.600012	0.26533	0.450418	0	0.663265	0.205824	0.181273	1.33362	0.615046	0.331093	0.0731268	0.0991511	0.522946	0.351901	0.112899	0.0824789	0.327714	0.221527	0.931975	0.185142	0.0896522	0.107684	0.139698	0.493177	0.573175	0.149829	0.136733	0.408389	0.339495	0.339926	0.604142	0.609427	0.420078	0.201975	1.05334	0	0.104843	0.451568
LINC02213	0	0	0	0	0	0	0	0	0	0	0	0	0	0	0	0	0	0	0	0	0	0	0	0	0	0	0	0	0	0	0	0	0	0	0	0	0	0	0	0	0	0	0	0	0	0	0	0	0
AC012629.1	0	0	0	0	0	0	0	0	0	0	0	0	0	0	0	0	0	0	0	0	0	0	0	0	0	0	0	0	0	0	0	0	0	0.231676	0.233039	0	0	0	0	0	0	0	0	0	0	0	0	0	0
AC106771.1	0	0	0	0	0	0	0	0	0	0	0	0	0	0	0	0	0	0	0	0	0	0	0	0	0	0	0	0	0	0	0	0	0	0	0	0	0	0	0	0	0	0	0	0	0	0	0	0	0
LINC01194	0	0	0	0	0	0	0	0	0	0	0	0	0	0	0	0	0	0	0	0	0	0	0	0	0	0	0	0	0	0	0	0	0.0669142	0	0	0	0	0	0	0	0	0	0	0	0	0	0	0	0
LINC02220	0	0	0	0	0	0	0	0	0	0	0	0	0	0	0	0	0	0	0	0	0	0	0	0	0	0	0	0	0	0	0	0	0	0	0	0	0	0	0	0	0	0	0	0	0	0	0	0	0
AC016553.1	0	0	0	0	0	0	0	0	0	0	0	0	0	0	0	0	0	0	0	0	0	0	0	0	0	0	0	0	0	0	0	0	0	0	0	0	0	0	0	0	0	0	0	0	0	0	0	0	0
AC016575.1	0.440026	0.209963	0.404347	0	0.253687	0	0	0	0	0.378776	0	0	0.169573	0	0	0	0.218662	0.454111	0.62124	0.242136	0.172695	0.328666	0.673193	0	0	0.174187	0	0	0	0	0.322057	0	0	0.195362	0.182921	0	0	0.305519	0.213413	0.178386	0	0.352631	0	0.293891	0.641585	0	0.197508	0.236497	0
LINC02149	0	0	0	0	0	0	0	0	0	0	0	0	0	0	0	0	0	0	0	0	0	0	0	0	0	0	0	0	0	0	0	0	0	0	0	0	0	0	0	0	0	0	0	0	0	0	0	0	0
LINC02150	0.0580408	0.0489065	0.0416362	0.108305	0.0699922	0.0678785	0.0759626	0	0	0	0.0608666	0	0.0299527	0	0.0985749	0.13929	0.0413799	0	0.0735347	0.0976288	0	0.0946503	0.154765	0	0.0721797	0.0566978	0.0607777	0.0504427	0.0771978	0.0502553	0.0699367	0.0896522	0	0.0860821	0.0986464	0.145141	0.0621069	0.121937	0.102299	0.036151	0.125699	0.035029	0	0.0262927	0.129713	0	0	0.0584458	0.069478
AC022113.2	0	0	0	0	0	0	0.126915	0	0	0	0	0	0	0.104405	0	0	0	0	0	0	0	0	0	0	0	0	0	0.0971508	0	0	0	0	0	0	0.150114	0	0.0916209	0	0	0.0763144	0	0	0	0	0.17057	0.171898	0	0	0
AC026790.1	0	0	0	0.267469	0	0	0	0	0	0.303184	0	0	0	0	0	0.190196	0	0	0	0	0	0.271455	0	0	0	0	0	0	0	0	0	0	0	0	0	0	0	0	0	0.268886	0	0	0	0	0	0	0	0	0
AC026785.2	0	0	0	0	0	0	0	0	0	0	0	0	0	0	0	0	0	0	0	0	0	0	0	0	0	0	0	0	0	0	0	0	0	0	0	0	0	0	0	0	0	0	0	0	0	0	0	0	0
AC026785.3	0	0	0	0	0	0	0	0	0	0	0	0	0	0	0	0	0	0	0	0	0	0	0	0	0	0	0	0	0	0	0	0	0	0	0	0	0	0	0	0	0	0	0	0	0	0	0	0	0
LINC02111	0	0	0	0	0	0	0	0	0	0	0	0	0	0	0	0	0	0	0	0	0	0	0	0	0	0	0	0	0	0	0	0	0	0	0	0	0	0	0	0	0	0	0	0	0	0	0	0	0
LINC02217	0	0	0	0	0	0	0	0	0	0	0	0	0	0	0	0	0	0	0	0	0	0	0	0	0	0	0	0	0.470284	0	0	0	0	0	0	0	0	0	0	0	0	0	0	0	0	0	0	0	0
LINC02100	0	0	0	0	0	0	0	0	0	0	0	0	0	0	0	0	0	0	0	0	0	0	0	0	0	0	0	0	0	0	0	0	0	0	0	0	0	0	0	0	0	0	0	0	0	0	0	0	0
AC106744.2	0	0	0	0	0	0	0	0	0	0	0	0	0	0	0	0	0	0	0	0	0	0	0	0	0	0	0	0	0	0	0	0	0	0	0	0	0	0	0	0	0	0	0	0	0	0	0	0	0
CDH18-AS1	0	0	0	0	0	0	0	0	0	0	0	0	0	0	0	0	0	0	0	0	0	0	0	0	0	0	0	0	0	0	0	0	0	0	0	0	0	0	0	0	0	0	0	0	0	0	0	0	0
LINC02241	0	0	0	0	0	0	0	0	0	0	0	0	0	0.0258953	0	0	0.0508082	0	0	0	0	0	0	0	0	0	0	0	0	0	0	0	0	0	0	0	0	0	0	0	0.0768486	0	0	0	0	0	0	0	0
LINC02146	0	0	0	0	0	0	0	0	0	0	0	0	0	0	0	0	0	0	0	0	0	0	0	0	0	0	0	0	0	0	0	0	0	0	0	0	0	0	0	0	0	0	0	0	0	0	0	0	0
AC093274.1	0	0	0	0	0	0	0	0	0	0	0	0	0.0299527	0.0227751	0	0.0456669	0	0.0501565	0	0	0	0	0	0	0	0.031098	0.0406721	0	0	0	0	0.0602366	0	0.0349649	0.0353593	0	0	0	0	0	0	0.035029	0.0409732	0.0230708	0	0	0.0362386	0	0
AC091946.2	0.420078	0	0	0	0	0.484324	0	0	0	0	0.405839	0	0.291848	0.716054	0	0	0	0	0	0.40122	0	0	0	0.495852	0.42715	0.314154	0.406708	0	0	0	0	0	0.397183	0	0.325559	0	0.402586	0	0.365575	0	0	0	0.471254	0	0	0	0	0.396444	0
AC010445.1	0	0	0	0	0	0	0	0	0	0	0	0	0	0	0	0	0	0	0	0	0	0	0	0	0	0	0	0	0	0	0	0	0	0	0	0	0	0	0	0	0	0	0	0	0	0	0	0	0
C5orf17	0.121548	0.0395809	0	0	0.0538441	0	0.425177	1.36242	0.138539	0	0.122224	0	0.117983	0.209771	0.452112	0	0.0810574	0.169467	0.137522	0.0840091	0	0.117308	0.0991511	0	0.207205	0.195162	1.43409	0.0743268	0	0	0.0328534	0.0675734	0	0.0615802	0.394804	0.3164	0.0508555	0.087163	0	0	0	0.0429953	0.352631	0.721106	0.153667	0.0416868	0.184029	0.0695902	0.0941273
AC010387.1	0	0	0	0	0	0	0	0	0	0	0	0	0	0	0	0	0	0	0	0	0	0	0	0	0	0	0	0	0	0	0	0	0	0	0	0	0	0	0	0	0	0	0	0	0	0	0	0	0
LINC02239	0	0	0	0	0	0	0	0	0	0	0	0	0	0	0	0	0	0	0	0	0	0	0	0	0	0	0	0	0	0	0	0	0	0	0	0	0	0	0	0	0	0	0	0	0	0	0	0	0
LINC02228	0	0	0	0	0	0	0	0	0	0	0	0	0	0	0	0	0	0	0	0	0	0	0	0	0	0	0	0	0	0	0	0	0	0	0	0	0	0	0	0	0	0	0	0	0	0	0	0	0
LINC02211	0	0	0	0	0	0	0	0	0	0	0	0	0	0	0.136733	0	0	0	0	0	0	0	0	0	0	0	0	0	0	0	0.052302	0	0	0	0	0	0	0	0	0	0	0	0	0	0	0	0	0	0.0811566
AC099499.1	0	0	0	0	0	0	0	0	0	0	0	0	0	0	0	0	0	0	0	0	0	0	0	0	0	0	0	0	0	0	0	0	0	0	0	0	0	0	0	0	0	0	0	0	0	0	0	0	0
AC106754.1	0	0.0907908	0	0	0.0699922	0	0.0845854	0	0	0.103103	0	0	0	0	0.229831	0	0.0508082	0	0	0	0	0	0	0	0	0	0	0	0.117784	0	0	0	0	0.0425379	0	0	0	0	0	0.0653709	0	0	0.281781	0	0	0	0	0.0932692	0
AC022140.1	0	0	0	0	0	0	0	0	0	0	0	0	0	0	0	0	0	0	0	0	0	0	0	0	0	0	0	0	0	0	0	0	0	0	0	0	0	0	0	0	0	0	0	0	0	0	0	0	0
AC025475.1	0	0	0	0	0	0	0	0	0	0	0	0	0	0	0	0	0	0	0	0	0	0	0	0	0	0	0	0	0	0	0	0	0	0	0	0	0	0	0	0	0	0	0	0	0	0	0	0	0
AC113347.4	0	0	0	0	0	0	0	0	0	0	0	0	0	0	0	0	0	0	0	0	0	0	0	0	0	0	0	0	0	0	0	0	0	0	0	0	0	0	0	0	0	0	0	0	0	0	0	0	0
PURPL	0.255892	0.259418	0.0303587	0.424418	0.137099	0.207007	1.26792	0.273354	0.197508	0	0.417482	0	0.102666	1.18496	0.853676	0.383198	0.618843	0.304023	0.190473	0.293349	0.291321	0.129456	0.232873	0.0860821	0.172296	0.185432	0.215476	0	0.143923	0.49647	0.160551	0.205824	0	0.195362	0.138051	0.298224	0.456014	0.808206	0.53302	0.0763144	0.430385	0.145484	0.915586	0.370949	0	0.817936	0.271455	0.186895	0.334254
LINC02103	0	0	0	0	0	0	0	0	0	0	0	0	0	0	0	0	0	0	0	0	0	0	0	0	0	0	0	0	0	0	0	0	0	0	0	0	0	0	0	0	0	0	0	0	0	0	0	0	0
AC008825.1	0	0	0	0	0	0	0	0	0	0	0	0	0	0	0	0	0	0	0	0	0	0	0	0	0	0	0	0	0	0	0	0	0	0	0.723248	0	0	0	0	0	0	0.145484	0	0	0	0	0	0	0
LINC02109	0	0	0	0	0	0	0	0	0	0	0	0	0	0	0	0.127008	0	0.135025	0	0	0	0	0	0	0	0	0	0	0	0	0	0	0	0	0.161123	0	0	0	0	0	0	0	0	0	0	0.113856	0	0	0
LINC02064	0	0	0	0	0	0	0	0	0	0	0	0	0	0	0	0	0	0	0	0	0	0	0	0	0	0	0	0	0	0	0	0	0	0	0	0	0	0	0	0	0	0	0	0	0	0.15674	0	0	0
AC022447.3	0	0	0	0	0	0	0	0	0	0	0	0	0	0	0	0	0	0	0	0	0	0	0	0	0	0	0	0	0	0	0	0	0	0	0	0	0	0	0	0	0	0	0	0	0	0	0	0	0
AC022447.1	0	0	0	0	0	0	0	0	0	0	0	0	0	0	0	0	0	0	0	0	0	0	0	0	0	0	0	0	0	0	0	0	0	0	0	0	0	0	0	0	0	0	0	0	0	0	0	0	0
AC022447.7	0	0	0	0	0	0	0	0	0	0	0	0	0	0	0	0	0	0	0	0	0	0	0	0	0	0	0	0	0	0	0	0	0	0	0	0	0	0	0	0	0	0	0	0	0	0	0	0	0
AC025181.2	1.49813	2.65363	1.65321	1.77192	2.09589	2.19268	1.41248	2.19268	2.10893	2.35747	2.3388	2.63113	2.49651	1.7302	2.12837	1.70264	1.10499	2.34813	0.739595	2.10893	2.69937	2.20801	1.97059	1.6983	2.98557	1.5408	1.71172	2.0084	2.16443	2.3217	1.62732	2.0084	1.91314	2.44713	2.1715	1.53407	2.81909	2.12837	1.61542	2.29573	1.45018	1.19436	1.63167	2.0084	2.0699	2.54807	2.79329	2.14257	1.41517
LINC02061	0	0	0	0	0	0	0	0	0	0	0	0	0	0	0	0	0	0	0	0	0	0	0	0	0	0	0	0	0	0	0	0	0	0	0	0	0	0	0	0	0	0	0	0	0	0	0	0	0
AC010343.3	0	0	0	0	0	0	0	0	0	0	0	0	0	0	0	0	0	0	0	0	0	0	0	0	0	0	0	0	0	0	0	0	0	0	0	0	0	0	0	0	0	0	0	0	0	0	0	0	0
LINC02120	0	0	0	0	0	0	0	0	0	0	0	0	0	0	0	0	0	0	0	0	0	0	0	0	0	0	0	0	0	0	0	0	0	0	0	0	0	0	0	0	0	0	0	0	0	0	0	0	0
AC034223.1	0	0	0	0	0	0	0	0	0	0	0	0	0	0	0	0	0	0	0	0	0	0	0	0	0	0	0	0	0	0	0	0	0	0	0	0	0	0	0	0	0	0	0	0	0	0	0	0	0
AC034223.2	0	0	0	0	0	0	0	0	0	0	0	0	0	0	0	0	0	0	0	0	0	0	0	0	0	0	0	0	0	0	0	0	0	0	0	0	0	0	0	0	0	0	0	0	0	0	0	0	0
LINC02160	0	0	0	0	0	0	0	0	0	0	0	0	0	0	0	0	0	0	0	0	0	0	0	0	0	0	0	0	0	0	0	0	0	0	0	0	0	0.19968	0	0	0	0	0	0	0	0	0	0	0
AC034232.2	0	0	0	0	0	0	0	0	0	0	0	0	0	0	0	0	0	0	0	0	0	0	0	0	0.0841812	0	0	0	0	0	0	0	0	0	0	0	0	0	0	0	0	0	0	0	0	0	0	0	0
AC139792.1	0	0	0.125699	0	0	0	0	0	0	0	0	0.137522	0	0	0	0	0.0925858	0.114988	0	0	0.161578	0	0	0.0739641	0	0	0	0	0	0	0	0	0	0	0	0	0	0	0	0.0763144	0	0	0	0.132491	0	0	0.0824789	0	0
AC025754.2	0	0.168112	0.326158	0.267469	0	0.248333	0.56662	0	0.159497	0	0.459662	0.402151	0	0	0	0	0	0	0	0	0.146946	0.271455	0	0.247842	0	0.140425	0	0.187894	0.221527	0	0	0	0.489912	0.153295	0.150114	0.35503	0.186224	0	0.326487	0.384458	0.441409	0.296696	0	0.243192	0.536664	0.187343	0	0	0.365125
AC026741.1	0	0.138051	0	0.223807	0	0	0.19477	0	0	0.25426	0	0	0.117983	0	0	0.165961	0	0	0.361654	0.171898	0.320776	0.216963	0	0.108409	0	0	0	0	0	0.156538	0.213785	0	0	0	0.12744	0.298224	0.149829	0.212558	0	0.128965	0.52702	0.130815	0	0.210123	0	0	0	0	0
LINC02117	0	0	0	0	0	0	0	0	0	0	0	0	0	0	0	0	0	0	0	0	0	0	0	0	0	0	0	0	0	0	0	0	0	0	0	0	0	0	0	0	0	0	0	0	0	0	0	0	0
AC008869.1	0	0	0	0	0	0	0	0	0	0	0	0	0	0	0	0	0	0	0	0.207007	0	0	0	0	0	0	0	0	0	0	0	0	0	0	0	0	0	0	0	0	0	0	0	0	0	0	0	0	0
LINC02110	0	0	0	0	0	0	0	0	0	0	0	0	0	0	0	0	0	0	0	0	0	0	0	0	0	0	0	0	0	0	0	0	0	0	0	0	0	0	0	0	0	0	0	0	0	0	0	0	0
AC034226.1	0	0	0	0	0	0	0	0	0	0	0	0	0	0	0	0	0	0	0	0	0	0	0	0	0	0	0	0	0	0	0	0	0	0	0	0	0	0	0	0	0	0	0	0	0	0	0	0	0
LINC02119	0	0	0	0	0	0.0563907	0	0	0	0	0	0	0	0	0	0	0	0	0.0615802	0	0	0	0	0	0	0	0	0	0	0	0	0	0	0	0	0	0	0	0	0	0	0	0	0	0	0	0	0	0.0461531
AC010425.1	0	0	0.0809582	0	0	0.152547	0	0	0	0	0	0	0.102666	0	0	0	0	0	0	0	0	0	0	0	0	0	0	0	0	0	0	0	0	0	0	0	0	0	0	0	0	0.101474	0	0	0	0	0.111051	0	0.139955
OSMR-AS1	0.0921472	0.209963	0.224267	0.126056	0.207007	0	0.17487	0.214589	0.129639	0	0.164238	0.192026	0.25397	0.333096	0	0.20321	0.194214	0.0942899	0.128965	0	0.161578	0.271455	0	0.0552087	0	0.164238	0	0.3096	0.156336	0.0877553	0.284987	0.186749	0.245938	0.264915	0.115181	0.229304	0	0.591134	0.0752674	0.117218	0.115602	0.233204	0.140425	0.170445	0.153667	0	0.0607777	0.532361	0.201814
LINC02104	0.412528	0.109872	0.153165	0	0	0	0	0	0	0	0	0	0	0.16296	0	0	0.104088	0	0	0	0	0	0	0	0.123	0.0813551	0	0	0	0	0.0895155	0.274375	0.245938	0	0	0	0	0	0	0.0889081	0	0	0	0.228841	0	0.129128	0.210282	0.246871	0.260191
LINC00603	0	0	0	0	0	0	0	0	0	0	0	0	0	0	0	0	0	0	0	0	0.184631	0	0	0	0	0	0	0	0	0	0.0895155	0	0	0	0.279244	0	0	0	0	0	0	0	0.127008	0.0844284	0	0	0	0.139558	0
LINC00604	0	0	0	0	0	0	0	0	0	0	0	0	0	0	0	0	0	0	0	0	0	0	0	0	0	0	0	0	0	0	0	0	0	0.127692	0	0	0	0	0	0	0	0	0	0	0	0	0	0	0
AC008875.1	0.225009	0.175923	0.332029	0	0.156224	0	0.379128	0	0.231982	0.227727	0.0711879	0.10704	0	0.247329	0.147045	0.0799794	0.133206	0.0942899	0.510364	0	0.0721797	0	0	0.19968	0	0	0.0824789	0	0.231008	0.0877553	0.160551	0.114581	0	0	0.0617796	0	0.0817826	0.121937	0.148561	0.117218	0.196926	0.0639811	0.15303	0.0425379	0	0.0738419	0.0704447	0.155008	0
AC025171.5	0.198802	0.190473	0.171898	0.196086	0.190473	0	0.108051	0.186089	0.278786	0.127555	0	0.304867	0	0.152237	0.136733	0.468049	0.118352	0.204551	0.268078	0.152547	0.184631	0.178386	0.144026	0	0.0841812	0.0464287	0.0710338	0.348673	0.0863952	0	0.213785	0.105873	0.128965	0.114837	0.150114	0	0.0721797	0.167156	0.116386	0.103693	0.105362	0.160747	0.0754249	0.132491	0	0.113856	0.0607777	0	0
AC025171.4	0.425956	0.598522	0.392465	0.167542	0.812003	0.207007	0.548127	0.519388	0.31441	0.239765	0.0947576	0.32676	0.304254	0.746147	0.125818	0.256083	0.306655	0.226334	0.786723	0.293349	0.257293	0.373688	0.185529	0.343722	0.157959	0.274116	0.16439	0.255284	0.303793	0.201653	0.322057	0.30865	0.21113	0.302008	0.171139	0.298224	0.102299	0.151365	0.19989	0.330099	0.498776	0.328341	0.660335	0.441409	0.267469	0.0632845	0.462889	0.125263	0.121149
AC104119.1	0	0	0	0	0	0	0	0	0	0	0	0	0	0	0	0	0	0	0	0	0	0	0	0	0	0	0	0	0	0	0	0	0	0	0	0	0	0	0	0	0	0	0	0	0	0	0	0	0
AC093292.1	0	0	0	0	0	0	0	0	0	0	0	0	0	0	0	0	0	0	0	0	0	0	0	0	0	0	0	0	0	0.171299	0	0	0	0	0	0	0	0	0	0	0	0	0	0	0	0	0	0	0
AC093297.1	0	0	0	0	0	0	0	0	0	0	0	0	0	0	0	0	0	0	0	0.130873	0	0.159604	0	0	0	0.32676	0	0	0	0	0	0	0	0	0.0986464	0	0	0	0	0.0889081	0	0	0	0	0	0	0	0	0
AC093297.2	1.63167	1.64512	1.41248	1.34184	1.79155	1.86554	2.0501	1.73476	1.89585	1.77646	1.61921	1.34748	1.66205	1.69356	1.52044	1.35945	2.0501	1.3897	1.33362	1.46662	1.16388	1.48416	1.28112	1.63601	1.67019	1.59149	1.64056	1.81026	1.56389	1.62732	2.23215	2.0501	1.10079	1.85574	1.38694	1.41517	1.28112	1.68426	1.75349	1.66205	1.43746	1.33635	1.63167	1.99507	1.70264	1.87045	1.97059	1.42102	1.69356
AC114954.1	0	0	0	0	0	0	0	0	0	0	0	0	0	0	0	0	0	0	0	0	0	0	0	0	0	0	0	0	0	0	0	0	0	0	0	0	0	0	0	0	0	0	0	0	0	0	0	0	0
AC122694.1	0	0	0	0	0	0	0	0	0	0	0	0	0	0	0	0	0	0	0	0	0	0	0	0	0	0	0	0	0.143923	0	0	0	0	0.0996802	0	0	0	0	0	0	0	0	0	0	0	0	0	0	0
AC112187.3	0	0	0.245663	0	0.222696	0	0.444505	0	0.179964	0.548127	0	0	0.157816	0.136141	0	0.219159	0.194214	0.226334	0.83093	0	0	0.512945	0	0.146026	0	0.301421	0	0.561072	0	0.201653	0.153546	0	0	0	0.316084	0	0	0	0	0.167397	0	0.591943	0	0	0	0	0	0.213944	0
AC022441.1	0	0.129238	0	0	0	0	0	0	0	0	0	0	0	0	0	0	0	0	0	0	0	0	0	0	0	0	0	0	0	0	0	0	0	0	0	0	0	0	0	0	0	0	0	0	0	0	0	0	0
AC022441.2	0	0	0	0	0	0	0	0	0	0	0	0	0	0	0	0	0	0	0	0	0	0	0	0	0	0	0	0	0	0	0	0	0	0	0	0	0	0	0	0	0	0	0	0	0	0	0	0	0
AC008808.2	0	0.348673	0.072017	0.180173	0	0	0	0.227542	0.109161	0.201363	0.107146	0	0	0.389041	0.214781	0.127008	0.218662	0	0	0	0.184631	0.178386	0	0.3096	0.123	0.174187	0	0.123129	0.254765	0	0	0.164238	0	0	0	0	0.113783	0.167156	0	0.103693	0	0.28365	0	0.072017	0	0.113856	0.292575	0.236497	0.139955
LINC02106	0.131225	0.315768	0.287311	0.299172	0.222696	0	0	0	0	0	0.257603	0	0	0.247329	0	0.219159	0.104088	0.12437	0	0.130873	0.172695	0	0	0.403525	0	0.441872	0	0	0.495317	0.213785	0.433497	0.374185	0.21113	0	0.0986464	0	0.113783	0	0	0.0889081	0.154641	0.756933	0.21113	0.218975	0.201975	0.444505	0.348365	0	0.232873
AC008808.1	0	0.300474	0	0	0	0.248333	0	0	0	0	0.177517	0	0	0	0	0	0	0	0	0	0	0.271455	0	0	0	0.140425	0	0	0	0	0	0	0	0	0	0	0.186224	0	0	0	0	0	0	0	0.304023	0.187343	0	0	0
AC091860.2	0	0	0	0	0	0	0	0	0	0.127555	0	0	0	0	0	0	0	0	0	0	0	0	0	0	0	0	0	0	0	0	0	0	0	0	0	0	0	0	0	0	0	0	0	0	0	0	0	0	0
LINC02105	0	0	0	0	0	0	0	0	0	0	0	0	0	0	0	0	0	0	0	0	0	0	0	0	0	0	0	0	0	0	0	0	0	0	0	0	0	0	0	0	0	0	0	0	0	0.113856	0	0	0
AC025175.1	0.246362	0	0.353712	0	0.237913	0.107146	0.643107	0.433497	0.355765	0.239765	0.247842	0.12273	0.291848	0.530416	0.157055	0.0903218	0.205824	0.31441	0.239017	0.259131	0.131225	0.233204	0.449813	0.216963	0.096952	0.232406	0.346259	0.0889081	0.170241	0.229304	0.538104	0.205824	0	0.139698	0.303184	0.419196	0.0817826	0.212558	0.161246	0.280533	0.296696	0.256343	0.462372	0.268078	0.465841	0.542698	0.260932	0.364275	0.0941273
LINC01033	0	0	0	0	0	0	0	0	0	0	0	0	0	0	0	0	0.181428	0	0	0	0	0	0	0	0	0	0	0	0	0	0	0	0	0	0	0	0	0	0	0	0	0	0	0	0	0	0	0	0
AC112198.3	0	0	0	0	0	0	0	0	0	0	0	0	0	0	0	0	0	0	0	0	0	0	0	0	0	0	0	0	0	0	0	0	0	0	0	0	0	0	0	0	0	0	0	0	0	0	0	0	0
AC034238.3	0	0	0	0	0	0	0	0	0	0	0	0	0	0	0	0	0	0	0	0	0	0	0	0	0	0	0	0	0	0	0	0	0	0	0	0	0	0	0	0	0	0	0	0	0	0	0	0	0
AC034238.2	0	0	0	0	0	0	0	0	0	0	0	0	0	0	0	0	0	0	0	0	0	0	0	0	0	0	0	0	0	0	0	0	0	0	0	0	0	0	0	0	0	0	0	0	0	0	0	0	0
AC034245.1	0	0	0	0	0	0	0	0	0	0	0	0	0	0	0	0.0614331	0	0	0	0	0	0	0	0	0	0	0	0	0	0	0.0398842	0	0	0	0	0	0	0	0	0	0	0	0	0	0	0	0	0	0
LINC01948	0.209373	0.463881	0.459662	0.280006	0.410044	0.543364	0.406178	0.20092	0.42758	0	0.615046	0.353712	0.35503	0.508391	0.169573	0.219159	0.512306	0.292836	0.47622	0	0.47622	0.614125	0.185529	0.577125	0.584295	0.465257	0.53302	0.283117	0.289011	0.188388	0.38976	0.243376	0.554131	0.561072	0.353331	0.35503	0.174764	0.242826	0.674915	0.481778	0.430385	0.631421	0.845782	0.132491	0.187894	0.570994	0.768143	0	0.62124
AC008780.1	0	0	0	0	0	0	0	0	0	0	0	0	0.157816	0	0	0	0	0	0	0	0	0	0	0	0	0	0	0	0	0	0	0	0	0	0	0	0	0	0	0	0	0	0	0	0	0	0	0	0
AC008780.2	0	0	0	0	0	0	0	0	0	0	0	0	0	0	0	0	0	0	0	0	0	0	0	0	0	0	0	0	0	0	0	0	0	0	0	0	0	0	0	0	0	0	0	0.0425379	0	0	0	0	0
AC106822.1	0	0	0	0	0	0	0	0	0	0	0	0	0	0	0	0	0	0	0	0	0	0	0	0	0	0	0	0	0	0	0	0	0	0	0	0	0	0	0	0	0	0	0	0	0	0	0	0	0
LINC02225	0	0	0	0	0	0	0	0	0	0	0	0	0	0	0	0.0456669	0	0	0.0502827	0	0	0	0	0	0	0	0	0	0	0	0	0	0	0	0	0	0	0	0	0	0	0	0	0	0	0	0	0	0
LINC02101	0	0.0825679	0	0	0	0	0	0	0	0.157055	0	0	0	0.0420811	0	0	0	0	0	0	0	0	0	0	0	0.125759	0	0	0	0	0	0	0	0.0734772	0	0	0	0	0.161246	0	0.125699	0	0.0944701	0	0	0	0.0704447	0.104843	0.0941273
PART1	0.0580408	0.129238	0.0643588	0.0890443	0.0699922	0.107146	0.0759626	0.117308	0	0	0.107146	0.10704	0.0451138	0.0227751	0	0.0699367	0.0508082	0.0570073	0.0502827	0.0557975	0.0721797	0.1433	0	0.12744	0.0601399	0.0566978	0.0710338	0.0504427	0.0544015	0.0502553	0.118688	0.0896522	0.0765726	0.0615802	0.0521681	0.119758	0.0508555	0	0.0541223	0.036151	0.0665708	0.101474	0.0754249	0.115371	0	0.214781	0.0362386	0	0.069478
LINC02057	0	0	0	0	0.207007	0.136828	0	0.20092	0	0	0.107146	0	0	0	0	0.23343	0	0.12437	0.198495	0	0	0	0	0	0	0	0.118201	0	0	0	0	0	0	0	0	0.229304	0	0	0	0.0889081	0	0	0	0	0	0	0.0824789	0.114709	0.107398
C5orf64-AS1	0	0.0489065	0	0.299172	0.0699922	0	0.0922865	0	0.148781	0.11133	0	0.0929584	0.0368208	0.0420811	0	0.0614331	0.0605955	0.0756927	0.103339	0.0703533	0.274375	0.129456	0	0.0401039	0.172296	0	0	0	0	0.102015	0.0398842	0	0.0669142	0.153295	0.0521681	0	0.0621069	0	0.0881516	0.103693	0	0.184631	0	0.170445	0	0.129128	0.111051	0	0.139955
AC026434.1	0	0	0	0	0	0	0	0	0	0	0	0	0	0	0	0	0	0	0	0	0	0	0	0	0	0	0	0	0	0	0	0	0	0	0	0	0	0	0	0	0	0	0	0	0	0	0	0	0
AC092354.2	0.162355	0.315768	0.0907908	0.21113	0.369156	0.35149	0	0	0.224402	0.227727	0.530416	0	0.117983	0.178919	0	0.13929	0	0.159604	0.169274	0	0.115815	0.526036	0.416547	0.192223	0	0.207659	0.264267	0.50418	0.409572	0	0.380608	0.473073	0.389041	0.231676	0.405839	0	0.252474	0.19968	0.25397	0.452689	0.35149	0.222233	0.15303	0.431987	0.415196	0.654973	0.126244	0.396444	0.289323
AC092354.1	0	0	0.166369	0	0.253687	0	0	0.227542	0	0	0	0	0	0.16296	0	0	0.218662	0.261164	0	0	0	0	0	0	0.458598	0	0.242595	0.244208	0.277605	0.229304	0	0	0	0.366012	0.196669	0	0	0	0	0	0	0	0	0.149118	0	0.243009	0	0	0
AC025176.1	0	0	0	0	0	0	0	0	0	0	0	0	0	0	0	0	0	0	0	0	0	0	0	0	0	0	0	0.255284	0	0	0	0	0	0	0	0	0	0	0	0	0	0.212783	0	0	0	0	0	0	0
AC010359.1	0.284526	0	0.714133	0.36687	0.2825	0.188935	0.454969	0.767191	0.50065	0.407939	0.459662	0.192026	0.203494	0.395688	1.03965	0.494213	0.62636	0.292836	0.128965	0.171898	0.438613	0.797418	0.609427	0.2825	0.401715	0.314154	0.491626	0.146309	0.409572	0.258353	0.67583	0.62124	0.280533	0.433497	0.12744	0	0.252474	0.347049	0.381041	0.540795	0.482224	0.233204	0.386174	0.0958273	0.238171	0.1433	0.417929	0.155008	0.289323
LINC02065	0.140425	0	0	0	0	0	0	0.137369	0	0	0	0	0	0	0	0	0	0	0	0	0	0	0	0	0	0	0	0	0	0	0	0	0	0	0	0	0	0	0	0	0	0	0	0	0	0	0	0	0
LINC02229	0	0	0	0	0	0	0	0	0	0	0	0	0	0	0	0	0	0	0	0	0	0	0	0	0	0	0	0	0	0	0	0	0	0	0	0	0	0	0.102299	0	0.134888	0	0	0	0	0	0	0	0
AC010420.1	0	0	0	0	0	0	0	0	0	0	0	0	0	0	0	0	0.133206	0	0	0	0	0	0	0	0	0	0	0	0	0	0	0	0.280533	0	0	0	0	0	0	0	0	0	0	0	0	0	0	0	0
AC112206.2	0	0.0730557	0	0	0	0	0	0	0	0.290394	0.137099	0.12273	0	0	0	0.178099	0	0.194046	0	0	0.0844284	0	0	0	0.108513	0	0.0824789	0	0.254765	0.102015	0	0	0	0.0860821	0.0428617	0	0.208618	0	0	0.142766	0.134888	0	0	0.243192	0.153667	0.227357	0	0	0
LINC02242	0	0	0	0	0	0	0	0	0	0	0	0	0	0	0	0	0	0	0	0	0	0	0	0	0	0.0813551	0	0	0	0	0	0	0	0	0	0	0	0	0	0	0	0	0	0.0605955	0	0	0	0	0
AC106798.1	0	0	0	0.180173	0.137099	0	0	0	0	0	0	0	0	0	0	0	0	0	0	0	0	0	0	0.0860821	0	0	0	0.123129	0	0.130446	0	0	0	0	0	0	0	0	0	0	0	0	0	0	0	0	0	0	0
AC024581.1	0	0	0	0	0	0	0	0	0.109161	0	0	0	0	0	0	0	0	0.135025	0	0.152547	0.0990901	0	0	0	0	0	0	0	0	0	0	0	0	0	0.0986464	0	0	0	0	0	0	0	0	0	0	0	0	0	0
LINC02219	0	0	0	0	0	0	0	0	0	0	0	0	0	0	0	0	0	0	0	0	0	0	0	0	0	0.140425	0	0	0	0	0	0	0	0	0	0	0	0	0	0	0	0	0	0	0	0	0	0	0
AC024579.1	0	0	0	0	0	0	0	0	0	0	0	0	0	0	0	0	0	0	0	0	0	0	0	0	0	0	0	0	0	0	0	0	0	0	0	0	0	0	0	0	0	0	0	0	0	0	0	0	0
AC010280.2	0	0.182921	0	0	0	0	0	0	0	0	0	0	0	0	0	0	0	0	0	0	0	0	0	0	0	0	0	0	0	0	0	0	0	0	0	0	0	0	0	0	0	0	0	0	0	0.202175	0	0	0
AC010280.3	0	0	0	0	0	0	0	0	0	0	0	0	0	0	0	0	0	0	0	0	0	0	0	0	0	0	0	0	0	0	0	0	0	0	0	0	0	0	0	0	0	0	0	0	0	0	0	0	0
AC010280.1	0	0	0	0	0	0	0	0	0	0	0	0	0	0	0	0	0	0	0	0	0	0	0	0	0	0	0	0	0	0	0	0	0	0	0	0	0	0	0	0	0	0	0	0	0	0	0	0	0
AC093523.1	0	0	0	0	0.156224	0	0	0	0.129639	0	0	0	0	0	0	0	0	0	0	0	0	0	0	0	0	0	0	0	0	0	0	0.195362	0	0	0	0	0	0	0	0	0	0	0	0	0	0	0	0	0
AC093248.1	0	0	0	0	0	0	0	0	0.170027	0	0	0	0	0	0	0	0	0	0	0	0	0	0	0	0	0	0	0	0	0	0	0	0	0	0	0	0	0	0	0	0	0	0	0	0	0	0	0	0
LINC02198	0.151365	0.35503	0.297649	0.135816	0.156224	0.280533	0.117503	0.273354	0.331393	0.227727	0.122224	0.192026	0.215476	0.0826448	0	0.42715	0.133206	0.283914	0	0.242136	0.0721797	0.386174	0.250253	0.108409	0.224402	0.207659	0.434018	0.348673	0.289011	0.213785	0.112134	0.340809	0	0.522946	0.279244	0.280533	0.197072	0.19968	0.148561	0.167397	0.196926	0.340809	0.202834	0.201231	0.428951	0.381041	0.184029	0	0.302008
AC010273.2	0.198802	0.15674	0.857585	0.989509	0.343247	1.00992	0	0.482224	0.507726	0.498243	0.444027	0.706461	0.381855	0.508391	0	0.482224	0.306655	0.360406	0.692784	0.530416	0.146946	0	0.544729	0.12744	0.999623	0.140425	0.970361	0.643107	0.208851	0.721106	0.562504	0.425567	0.343722	0.852319	0.616453	0.815635	0.31908	0.421013	0.470284	0.582081	0.255492	0.729296	0	0.645668	0.304023	1.31688	0	0	0.365125
AC146944.4	3.04427	3.97621	3.07546	2.98557	1.31127	3.58608	4.20716	2.63113	2.73521	3.86866	3.97621	2.66461	3.50605	3.31792	4.09222	2.31292	2.79329	3.42641	2.01427	3.1409	3.17555	2.11522	3.01452	4.33931	1.86064	2.44713	3.35397	4.09222	3.35397	2.58798	3.50605	3.81408	3.15822	3.71703	2.84667	2.63113	3.2096	3.01452	2.67559	3.92243	2.56815	3.04427	3.86866	3.42641	1.89052	3.67179	3.2096	3.10824	2.13523
LINC02197	0.0826448	0.0327141	0.0907908	0.117784	0.156224	0.121716	0.0759626	0.137369	0.064601	0.103103	0.150203	0.0661714	0.0699922	0.0601399	0.0985749	0.0903218	0.0413799	0.135025	0.119087	0.0976288	0	0.0847062	0.111051	0.237516	0.0479195	0.0973112	0.0710338	0	0.0544015	0.0877553	0.0790515	0.164238	0.0765726	0.254765	0.0617796	0.107563	0.161473	0.087163	0.0428617	0.0653709	0.125699	0.160747	0.19307	0.0844284	0.0896522	0.187343	0.0953538	0.170445	0.139955
AC145141.2	0	0	0	0	0	0	0	0	0	0	0	0	0	0	0	0	0	0	0	0	0	0	0	0	0	0	0	0	0	0	0	0	0	0	0	0	0	0	0	0	0	0	0	0	0	0	0	0	0
AC145141.1	0	0	0	0	0	0	0	0	0	0	0	0	0	0	0	0	0	0	0	0	0	0	0	0	0	0	0	0	0	0	0	0	0	0	0	0	0	0	0	0	0	0	0	0	0	0	0	0	0
LINC02056	0	0	0	0	0	0	0	0	0	0	0	0	0	0	0	0	0	0	0	0	0	0	0	0	0	0	0	0	0	0	0	0	0	0	0.0986464	0	0	0	0	0	0.182749	0	0	0.182563	0	0	0	0	0
AC063979.2	0	0	0	0	0	0	0	0	0	0	0	0	0	0	0	0	0	0	0	0	0	0	0	0	0	0	0	0	0	0	0	0	0	0	0	0	0	0	0	0	0.096723	0	0	0	0.141362	0.0632845	0	0	0
AC008972.1	0	0.168112	0.267194	0.156897	0.2825	0.136828	0.144781	0.20092	0.0994543	0.168112	0.247842	0.137522	0.215476	0.0601399	0	0.20321	0.181428	0.304023	0.066968	0	0.34213	0.396802	0.185529	0.146026	0.302542	0.0813551	0.10493	0.210736	0.117784	0.115687	0.0790515	0.142101	0.199298	0.254765	0.233039	0	0.469207	0	0.186481	0.156112	0	0	0	0.132491	0.187894	0.202175	0.0824789	0.281781	0.107398
AC008972.2	0.525428	0.433497	0	0.546044	0.506705	0.188935	0.581424	0.903833	0.129639	0.239765	0	0.353712	0.31835	0.186602	0.258128	0.918509	0.3581	0.304023	0	0.310169	0.386591	0	0.975341	0.455492	0.536664	0.112899	0.718049	0.52702	0.668546	0.399005	0.306287	0.771518	0.734412	0.243559	0.429875	0.280533	0.264267	0.361216	0.396802	0.224267	0.642346	0.130815	0.271455	0.379738	0.252022	0.444505	0.708282	0.281781	0.441409
AC116345.1	0	0.138051	0	0	0	0	0	0.186089	0	0	0	0	0	0.126691	0	0	0	0	0.0735347	0	0.131225	0	0	0	0	0	0	0	0.095252	0	0	0	0	0	0	0	0	0	0	0	0	0	0	0	0	0	0	0	0
LINC02230	0	0	0	0	0	0	0	0	0	0	0	0	0	0	0	0	0	0	0	0	0	0	0	0	0	0	0	0	0	0	0	0	0	0	0	0	0	0	0	0	0	0	0	0	0	0	0	0	0
FOXD1-AS1	0	0	0.160052	0	0.207007	0.170696	0.17487	0	0	0	0	0	0	0.209771	0	0	0.0810574	0	0.149278	0.207007	0.131225	0.105362	0	0	0.351901	0	0.203954	0	0	0	0.0699367	0	0	0	0	0.622802	0	0	0	0	0	0	0.0595464	0.104715	0.304023	0.348056	0	0.483778	0
LINC01385	0	0	0	0	0	0	0	0	0	0	0	0	0	0	0	0	0	0	0	0	0	0	0	0	0	0	0	0	0	0	0	0	0	0	0	0	0	0	0	0	0	0	0	0	0	0	0	0	0
AC099522.2	0.503179	0.396802	0.486205	0	0.596339	0.399784	0.271674	0.241908	0.307023	0.890368	0.20052	0.521828	0.35503	0.65587	0.691781	0.707402	0.491626	0.181273	0.435441	0.555404	0.447449	0.342451	0.461272	0.690024	0.312462	0.301421	0.65587	0.386174	0.687938	0.607818	0.666758	0.294478	0.431987	0.532361	0.607818	0.185946	0.59773	0.605412	0.604777	0.694661	0.378776	0.369929	0.406708	0.31908	0.385756	0.312666	0.532361	0.302863	0.260191
AC093283.1	0	0.0907908	0	0	0	0.08151	0	0	0	0	0	0	0	0	0	0	0	0	0	0	0	0	0	0	0	0	0	0	0	0	0	0	0	0	0	0	0	0	0	0	0	0	0	0	0	0	0	0	0
LINC02122	0	0	0	0	0	0	0	0	0	0	0	0	0	0	0	0	0	0	0	0	0	0	0	0	0	0	0	0	0	0	0	0	0	0	0	0	0	0	0	0	0	0	0	0	0	0	0	0	0
LINC01333	0	0	0	0	0	0	0	0	0	0	0	0	0	0	0	0	0	0	0	0	0	0	0	0	0	0	0	0	0	0	0	0	0	0	0	0	0	0	0	0	0	0	0	0	0	0.0844284	0	0	0
LINC01332	0	0	0	0	0	0	0	0	0	0	0	0	0	0	0	0	0	0	0	0	0	0	0	0	0	0	0	0	0	0	0	0	0	0.243559	0	0	0	0	0	0	0	0	0	0	0	0	0	0	0
LINC01331	0	0	0	0	0	0	0	0	0	0	0	0	0	0	0	0	0	0	0	0	0	0	0	0	0	0	0	0	0	0	0	0	0	0	0	0	0	0	0	0	0	0	0	0	0	0	0	0	0
AC116337.3	0	0	0	0	0	0.107146	0	0	0.0730065	0	0	0	0	0	0	0	0	0	0	0	0	0	0	0	0	0	0	0	0	0	0	0.114581	0	0	0	0	0	0	0.0752674	0	0	0.0639811	0	0	0	0	0	0	0
AC008897.3	0.170979	0	0	0	0.173082	0	0	0.170837	0.138539	0.25426	0.137099	0	0	0.269636	0.258128	0.165961	0	0	0.186089	0	0.320776	0	0.277891	0	0	0	0.16439	0	0	0.288116	0.118688	0	0	0	0	0	0	0	0.148561	0	0	0	0	0.104715	0	0	0.260932	0	0
AC010245.2	0.801418	0.886004	1.26527	0.574378	1.0592	0.763987	1.00992	0.828515	1.08879	1.02985	0.868787	0.805807	0.744918	1.07056	0.394804	0.468049	1.26792	0.734412	0.57515	0.687021	0.654258	0.867408	0.664204	1.07056	0.48928	0.355765	0.731322	1.10499	0.676745	0.721106	0.880084	0.755853	0.540795	0.433497	0.405839	0.639722	0.687938	0.863413	1.13907	0.410515	0.60694	0.743689	0.915586	0.610157	0.581424	0.605412	0.758208	0.779643	0.62124
AC026774.1	0	0	0	0	0	0	0	0	0	0	0	0	0	0	0	0	0	0	0	0	0	0	0	0	0	0	0	0	0	0	0	0	0	0	0	0	0	0	0	0	0	0	0	0	0	0	0	0	0
AC108482.1	0	0	0	0	0	0	0	0	0	0	0	0	0	0	0	0	0	0	0	0	0	0	0	0	0	0	0	0	0	0	0	0	0	0	0	0	0	0	0	0	0	0	0	0	0	0	0	0	0
SCAMP1-AS1	2.19268	2.12151	2.24685	1.92485	1.82	2.39111	1.62327	1.46662	1.67019	2.48698	2.26268	2.23959	1.70698	2.5993	1.58753	2.12151	1.82991	2.34813	1.48767	1.65763	1.86064	1.85085	1.41785	1.61162	2.0699	1.48416	1.75349	1.85085	2.0084	1.98271	2.10893	2.3217	2.58798	2.13523	2.23959	1.14797	2.14991	1.68426	1.89052	2.12151	1.66205	2.54807	1.94813	2.48698	1.43409	2.51579	2.25411	1.73476	1.81026
LINC01337	0.198802	0	0.125699	0	0	0	0	0	0	0	0.164238	0	0	0.115138	0	0.190196	0.168686	0	0.149278	0	0	0	0	0	0	0	0	0	0	0	0	0	0	0	0	0	0	0	0	0	0	0.28365	0	0	0	0	0	0	0
AC026726.1	0.131225	0.0996123	0	0	0.117042	0	0	0	0	0	0	0	0	0.0601399	0	0	0.104088	0	0	0	0.172695	0	0	0	0	0	0	0	0	0	0	0	0	0	0	0	0	0	0.116386	0	0	0	0	0	0	0	0	0	0.121149
AC026782.1	0	0	0	0	0	0	0	0	0	0	0	0	0	0	0	0	0	0	0	0	0	0	0	0	0	0	0	0	0	0	0	0	0	0	0	0	0	0	0	0	0	0	0	0	0	0	0	0	0
AC026782.2	0	0	0	0	0	0	0	0	0	0	0	0	0	0	0	0	0	0	0	0	0	0	0	0	0	0	0	0	0	0	0	0	0	0	0	0	0	0	0	0	0	0	0	0	0	0	0	0	0
LINC01338	0	0.0907908	0	0	0	0	0	0	0	0	0	0	0	0	0	0	0	0	0	0	0	0	0	0.0739641	0	0	0	0	0	0	0	0	0	0	0	0	0	0	0	0	0	0	0	0	0	0.0976288	0	0	0
AC108174.1	0	0	0.0561975	0.146309	0	0	0	0	0.0813551	0	0	0	0	0	0	0	0	0	0	0	0	0	0	0	0	0	0	0	0	0	0	0	0	0	0	0	0	0	0	0	0	0	0	0	0	0.0844284	0	0	0
AC027338.2	0	0	0	0	0	0	0	0	0	0	0	0	0	0	0	0	0	0	0	0	0	0	0	0	0	0	0	0	0	0	0	0	0	0	0	0	0	0	0	0	0	0	0	0	0	0	0	0	0
AC027338.1	0.0921472	0.168112	0.0907908	0.135816	0.0841812	0.107146	0	0.0874334	0.269352	0.136141	0.225954	0.10704	0	0	0	0	0.38741	0.0942899	0.0553528	0	0	0.216963	0.250253	0.237516	0.0841812	0.0566978	0.0824789	0	0.221527	0.258353	0	0.340809	0.0876759	0.181745	0.0617796	0	0.138884	0	0.0752674	0.2471	0.266272	0.130815	0.140425	0.0958273	0.153667	0.0738419	0.237516	0.155008	0.0941273
AC114928.1	0	0	0	0	0	0	0	0	0	0	0	0	0	0	0	0	0	0	0	0	0	0	0	0	0	0	0	0	0	0	0	0	0	0	0	0	0	0	0	0	0	0	0	0	0	0	0	0	0
AC117522.2	0	0	0	0	0	0	0	0	0	0	0	0	0	0	0	0	0	0	0	0	0	0	0	0	0	0	0	0	0	0	0	0	0	0.0860821	0	0	0	0	0	0	0	0	0	0	0	0	0	0	0
AC010486.1	0	0	0	0	0	0	0	0	0	0	0	0	0	0	0	0	0	0	0	0	0	0	0	0	0	0	0	0	0	0	0	0	0	0	0	0	0	0	0	0	0	0	0	0	0	0	0	0	0
AC010486.2	0	0	0	0	0	0	0	0	0	0	0	0	0	0	0	0	0	0	0	0	0	0	0	0	0	0	0	0	0	0	0	0	0	0	0	0	0	0	0	0	0	0	0	0	0	0	0	0	0
AC010486.3	0	0	0	0	0	0	0	0	0	0	0	0	0	0	0	0	0	0	0	0	0	0	0	0	0	0	0	0	0	0	0	0	0	0	0	0	0	0	0	0	0	0	0	0	0	0	0.0704447	0	0
AC010595.1	0	0	0	0	0	0	0	0	0	0	0	0	0	0	0	0	0	0	0	0	0	0	0	0	0	0	0	0	0	0	0	0	0	0	0	0	0	0	0	0	0	0	0	0	0	0	0	0	0
AC026414.1	0	0	0	0	0	0	0	0	0	0	0	0	0	0	0	0	0	0	0	0	0	0	0	0	0	0	0	0	0	0	0	0	0	0	0	0	0	0	0	0	0	0	0	0	0	0	0	0	0
AC016550.1	0	0	0	0	0	0	0	0	0	0	0	0	0	0	0	0	0	0	0	0	0	0	0	0	0	0	0	0	0	0	0	0	0	0	0	0	0	0	0	0	0	0	0	0	0	0	0	0	0
AC016550.2	0	0	0	0	0	0	0	0	0	0	0	0	0	0	0	0	0	0	0	0	0	0	0	0	0	0	0	0	0	0	0	0	0	0	0	0	0	0	0	0	0	0	0	0	0	0	0	0	0
AC016550.3	0	0	0	0	0	0	0	0	0	0	0	0	0	0	0	0	0	0	0	0	0	0	0	0	0	0	0	0	0	0	0	0	0	0	0	0	0	0	0	0	0	0	0	0	0	0	0	0	0
LINC02059	0	0	0	0	0	0.08151	0	0.0737704	0	0	0	0	0	0.0300284	0.0985749	0	0	0	0	0.0840091	0.038132	0.0731268	0	0	0.0479195	0	0.0496398	0	0	0	0	0	0	0	0	0	0	0	0	0	0	0	0	0	0	0	0	0	0
AC109492.1	0	0	0	0	0	0	0	0	0	0.611655	0	0	0	0	0	0	0	0	0	0	0.291321	0	0	0	0	0	0	0	0	0	0	0	0	0	0	0.711273	0	0	0.365575	0.318715	0	0	0	0	0	0	0	0	0
LINC01949	0	0.0327141	0	0.099212	0	0	0	0	0	0	0	0	0	0.0707	0	0.0456669	0.0413799	0	0	0	0	0	0.0991511	0	0	0.031098	0	0	0	0	0	0.0675734	0.0565176	0	0.0428617	0.119758	0	0	0	0.0451138	0	0	0	0	0	0.0337191	0	0.0584458	0
LINC02488	0	0	0	0	0	0	0	0	0	0	0	0	0	0	0	0	0	0	0	0	0	0	0	0	0	0	0	0	0	0	0	0	0	0	0	0	0	0	0	0	0	0	0	0	0	0	0	0	0
LINC02060	0.0664163	0.0639811	0	0	0	0.0678785	0	0	0	0.3164	0	0.0794373	0	0	0	0.0528177	0.0508082	0	0	0.207007	0.0990901	0	0	0.0333572	0.157959	0	0.203954	0.396444	0.0660083	0.0625547	0	0.0789544	0.0565176	0	0	0	0.0508555	0	0	0	0	0.0429953	0	0	0	0	0	0	0
AC091826.2	0	0	0	0	0	0	0.241112	0	0	0	0	0	0	0.136141	0	0	0.194214	0	0	0	0	0	0	0	0	0	0	0	0	0.201653	0	0.274375	0	0	0	0	0	0	0	0	0	0	0	0	0	0	0	0	0
LINC00461	0	0.0395809	0.0486975	0.0890443	0.0841812	0	0.0688976	0.0500885	0.0465857	0.0850772	0.0391027	0.0661714	0	0	0	0	0.0925858	0	0.0383504	0.0703533	0.038132	0	0	0	0.0479195	0	0.0607777	0	0.0544015	0.102015	0.0328534	0.0602366	0.0669142	0.0515669	0.0353593	0	0	0	0	0	0.0768486	0	0	0.0308068	0.0896522	0	0.0362386	0	0.0461531
AC008525.1	0	0	0	0	0	0	0	0	0	0	0	0	0	0	0	0	0	0	0	0	0	0	0	0	0	0	0	0	0	0	0	0	0	0	0	0	0	0	0	0	0	0	0	0	0	0	0	0	0
LINC02161	0	0	0	0	0	0	0	0	0	0	0	0	0	0	0	0	0	0	0	0	0	0	0	0	0	0	0	0	0	0	0	0	0	0	0	0	0	0	0	0	0	0	0	0	0	0	0	0	0
AC099554.1	0	0	0	0	0	0	0	0	0	0	0	0	0	0	0	0	0	0	0	0	0	0	0	0	0	0	0	0	0	0	0	0	0	0	0	0	0	0	0	0	0	0	0	0	0	0	0	0	0
AC093281.1	0	0	0	0	0	0	0	0	0	0	0	0	0	0	0	0	0	0	0	0	0	0	0	0	0	0	0	0	0	0	0	0	0	0	0	0	0	0	0	0	0	0	0	0	0	0	0	0	0
AC093281.2	0	0	0	0	0	0	0	0	0	0	0	0	0	0	0	0	0	0	0	0	0	0	0	0	0	0	0	0	0	0	0	0	0	0	0	0	0	0	0	0	0	0	0	0	0	0	0	0	0
AC123595.1	0.425956	0.0907908	0.454111	0.23674	0.117042	0.264267	0.299933	0	0	0	1.76251	0	0.998058	0.389041	0.441409	0.0699367	0.194214	0	0.066968	0.130873	0.161578	0	2.58798	0	0.777363	1.69356	0.16439	0.753593	0.687938	0.327374	0.355404	1.01173	0	0.139698	1.40534	0	0	1.58753	0	0.0889081	0.642346	0.0523496	0.609427	0.072017	0	0.261859	0.556658	2.58798	0.218791
ARRDC3-AS1	0.188575	0.20052	0.177617	0.328991	0.0996802	0.3214	0.126915	0.241908	0.197508	0	0.695536	0.618843	0.130873	0.348056	0.273605	0.165961	0.338172	0.0667603	0.31321	0.363123	0.184631	0	0.664204	0.176089	0.514117	0.864722	0.0824789	0.386174	0.328028	0.374185	0.372331	0.205824	0.186089	0.41159	0.417036	0.185946	0.197072	0.212558	0.102299	0.224267	0.154641	0.604142	0.352631	0.235958	0.385756	0.243009	0.0704447	0.955803	0.399395
AC114316.1	0	0.0327141	0	0	0	0	0	0	0	0	0.0391027	0	0.0299527	0	0.107398	0	0	0	0	0	0	0	0	0.0293945	0	0	0	0	0	0	0	0	0	0	0	0	0	0	0	0	0	0	0	0	0	0	0	0	0
AC124854.1	0	0	0.697552	0	0	0	0	0	0	0	0	0	0	0	0	0	0	0	0	0	0	0	0	0	0	0	0	0	0	0	0	0	0	0	0	0	0	0	0	0	0	0	0	0	0	0	0.406178	0	0
AC026780.1	0	0	0	0	0	0	0	0	0	0	0	0	0	0	0	0	0	0	0	0	0	0	0	0	0	0	0	0	0	0	0	0	0	0	0	0	0	0	0	0	0	0	0	0	0	0	0	0	0
AC026780.2	0	0	0	0	0	0	0.126915	0	0	0	0	0	0	0	0	0	0	0	0	0	0	0	0	0	0	0	0	0	0	0	0	0	0	0	0	0	0	0	0	0	0	0	0	0	0	0	0	0	0
AC008517.1	0	0	0	0	0	0	0	0.117308	0	0	0	0	0	0	0	0	0	0	0	0	0	0	0	0	0	0	0	0	0	0	0	0	0	0	0	0	0	0	0	0	0	0	0	0	0	0	0	0	0
LINC02058	0	0	0	0	0	0	0	0	0	0	0	0	0	0	0	0	0	0	0	0	0	0	0	0	0	0	0.0934571	0	0	0	0	0	0	0	0	0	0	0	0	0	0	0	0	0	0	0	0	0	0
AC012625.1	0	0	0	0	0	0	0	0	0	0	0	0	0	0	0	0	0	0	0	0	0	0	0	0	0	0	0	0	0	0	0	0	0	0	0	0	0	0	0	0	0	0.0886302	0	0	0	0	0	0	0
AC108102.1	0	0	0.0809582	0	0	0	0	0	0	0	0	0	0	0.0707	0	0	0	0	0	0	0	0	0	0	0	0	0	0	0	0	0	0	0	0	0	0	0	0	0	0.103693	0	0.101474	0	0	0.219716	0	0	0.139558	0
AC008592.4	0	0.275007	0.454111	0	0.190473	0	0	0	0.386591	0.279512	0.290394	0	0.130873	0.310169	0	0	0.295672	0	0.0898529	0	0.131225	0	0.302863	0.12744	0.188935	0.244965	0	0.17654	0	0.584295	0	0.572522	0.172496	0	0	0	0	0	0	0.142766	0.245165	0.145484	0.478325	0	0.285304	0.348056	0.389041	0.186895	0
AC008592.5	0.151365	0.109872	0.0809582	0.196086	0.137099	0	0	0.137369	0	0	0.122224	0.17368	0	0	0	0.127008	0.573175	0.147819	0.34549	0	0.184631	0.178386	0	0.176089	0.141664	0.0973112	0.33538	0.244208	0	0.130446	0	0.3214	0.245938	0	0	0.248543	0.232194	0	0	0.190961	0	0.101474	0.24003	0.253153	0.219716	0.129128	0.111051	0.246871	0.139955
LINC01554	0.284526	0.190473	0.466937	0.378048	0.343247	0.280533	0.320429	0.241908	0.25003	0.339145	0.712219	0.581424	0.31835	0.269636	0.184421	0.540795	0.534245	0.67583	0.322057	0.326487	0.540199	0.552354	0.70552	0.290646	0.289635	0.0813551	0.597035	0.20092	0.495317	0.299172	0.136637	0.707402	0.499309	0.397986	0.394804	0.3894	0.611655	0.568656	0.229016	0.540795	0.420078	0.0639811	0.329385	0.182563	0	0.494781	0.867408	0.625413	0.478752
AC008592.2	0	0	0	0	0	0	0	0	0	0	0	0	0	0	0	0	0	0	0	0	0	0	0	0	0	0	0	0	0	0	0	0	0	0	0	0	0	0	0	0	0	0	0	0	0	0	0	0	0
MIR583HG	0	0	0.0561975	0.146309	0	0.121716	0	0.101316	0	0.157055	0	0	0.193256	0	0	0.101116	0.0925858	0.194046	0	0.113929	0	0	0	0.064504	0	0	0.0934571	0.0971508	0	0.312462	0	0	0	0	0.0723851	0	0	0	0	0.190961	0.23264	0	0	0.0504427	0	0	0.223522	0	0
AC099509.1	1.28677	1.21082	0.933561	0.280006	0.207007	0.248333	0.495317	0.286559	0.170027	0.290394	0.851043	0.137522	0.157816	1.53407	0.305903	0.101116	0.181428	0.215268	0.336657	0	0.161578	0.693786	1.06274	0	0.289635	0.701427	0.491626	1.15455	0.45916	0.273856	0.784316	1.02446	0.499309	0.314154	0.751344	0	0.31908	0.92287	0	0.658634	0.616453	0.307328	0.418765	0.0605955	0	0.289323	0.313554	2.52555	1.52382
AC099509.2	0	0	0	0	0	0	0	0	0	0	0	0	0	0	0	0	0	0	0	0	0	0	0	0	0	0	0	0	0	0	0	0	0	0	0	0	0	0	0	0	0	0	0	0	0	0	0	0	0
LIX1-AS1	0.0921472	0	0.0303587	0	0.0538441	0	0.100033	0.0737704	0.0465857	0.103103	0	0.10704	0.0368208	0	0	0	0.0698812	0	0.0415507	0.0703533	0	0	0.134235	0.0860821	0	0	0	0	0	0	0.0455534	0	0	0	0	0.133206	0.0508555	0.184948	0.0541223	0.0451138	0	0	0	0.036151	0.102924	0	0.0437526	0	0
AC008883.2	0	0	0	0	0	0	0	0	0	0	0	0	0	0	0	0	0	0.226334	0	0	0	0	0	0	0	0.154124	0	0	0	0	0	0	0	0	0	0	0	0	0	0	0	0	0	0	0	0	0	0	0
LINC01340	0	0	0.107684	0	0	0	0	0	0	0	0	0.12273	0	0	0.157055	0	0	0	0	0	0	0	0	0	0	0	0	0	0	0	0	0	0	0.0734772	0	0	0	0	0	0	0	0	0	0	0	0	0	0	0
LINC02234	0.188575	0	0	0	0	0	0	0	0.148781	0	0	0.232406	0	0	0	0	0.0925858	0	0	0.113929	0.0721797	0.129456	0	0.064504	0	0	0.98609	0	0	0	0.185142	0	0	0	0	0	0	0.226969	0.0881516	0	0	0	0.173244	0	0	0	0.0824789	0	0.107398
LINC01846	0	0	0	0	0	0	0	0	0	0	0	0	0	0	0	0	0	0	0	0	0	0	0	0	0	0	0	0	0	0	0	0	0	0	0	0	0	0	0	0	0	0	0	0	0	0	0	0	0
LINC02062	0	0	0.107684	0	0	0	0	0.302863	0	0.595611	0	0	0.117983	0.19477	0	0	0	0	0.0849028	0.326487	0	0	0	0	0	0	0	0	0	0	0	0	0.161708	0.139698	0	0	0.149829	0	0.27978	0.23674	0	0	0.173244	0	0	0	0.138884	0.170445	0
LINC02113	0	0	0	0	0	0	0	0	0	0	0	0	0	0	0	0	0	0	0	0	0	0	0	0	0	0	0	0	0	0	0	0	0	0	0	0	0	0	0	0	0	0	0	0	0	0	0	0	0
AC113385.1	0	0	0	0	0	0.152547	0	0	0	0	0	0	0	0	0	0	0	0	0	0	0.0990901	0	0	0	0	0	0	0	0	0	0	0	0	0	0	0	0	0	0	0	0	0	0	0	0	0	0	0	0
AC021086.1	0.0664163	0	0.0416362	0	0	0	0	0	0.056587	0	0.0502059	0	0	0	0	0	0.0508082	0	0.0415507	0	0.0498668	0	0	0.0333572	0.157959	0	0	0.0585187	0.0660083	0.0625547	0	0	0.107684	0.0425379	0.0428617	0	0	0.110616	0	0.142766	0	0	0	0.140733	0	0.0416868	0.210282	0	0
AC027315.1	0	0	0	0	0	0	0	0	0	0	0	0	0	0	0	0	0	0	0	0	0	0	0	0	0	0	0	0	0	0	0	0	0	0	0	0	0	0	0	0	0	0	0	0	0	0	0	0	0
AC008948.1	0	0	0	0	0	0	0	0	0	0	0	0	0	0	0	0	0	0	0	0	0	0	0	0	0	0	0	0	0	0	0	0	0	0.254765	0	0	0	0	0	0	0	0	0	0	0	0	0	0	0
LINC00492	0	0	0	0	0	0	0	0	0	0	0	0	0	0	0	0	0	0	0	0	0	0	0	0	0	0	0	0	0	0	0	0	0	0	0	0	0	0	0	0	0	0	0	0	0	0	0	0	0
AC099487.1	0	0	0	0	0	0	0	0	0	0	0	0	0	0	0	0	0	0	0	0	0	0	0	0	0	0	0	0	0	0	0	0	0	0	0	0	0	0	0	0	0	0	0	0	0	0	0	0	0
LINC00491	0	0	0	0	0	0	0	0	0	0	0	0	0	0	0	0.0699367	0	0	0	0.130873	0	0	0.144026	0	0	0	0	0	0	0	0	0	0	0	0	0	0	0	0	0	0	0	0	0	0	0	0	0	0
AC010406.1	0	0	0	0	0	0	0	0	0	0	0	0	0	0.0707	0	0	0	0	0	0	0	0	0	0	0	0	0	0	0	0	0	0	0	0	0	0	0	0	0	0	0	0	0	0	0	0	0	0	0
LINC02115	0	0.168112	0	0	0	0	0	0	0	0	0	0	0	0	0	0	0	0	0	0	0	0	0	0	0	0	0	0	0	0	0	0	0	0	0	0	0	0	0	0	0	0	0	0	0	0	0	0	0
LINC02163	0	0	0	0	0	0	0	0	0	0	0	0	0	0	0	0	0	0	0	0	0	0	0	0	0	0	0	0	0	0	0	0	0	0	0	0	0	0	0	0	0	0	0	0	0	0	0	0	0
AC099520.2	0	0	0	0	0	0	0	0	0	0	0	0	0	0	0	0	0	0	0	0	0	0	0	0	0	0	0	0	0	0	0	0	0	0	0	0	0	0	0	0	0	0	0	0	0	0	0	0	0
AC091987.1	0	0	0	0	0	0	0	0	0	0	0	0	0	0	0	0	0	0	0	0	0	0	0	0	0	0	0	0	0	0	0	0	0	0	0	0	0	0	0	0	0	0	0	0	0	0	0.0704447	0	0
LINC01950	0	0	0	0	0	0	0	0	0	0	0	0	0	0	0	0	0	0	0	0	0	0	0	0	0	0	0	0	0	0	0	0	0	0	0	0	0	0	0	0	0	0	0	0	0	0	0	0	0
AC024587.2	0	0	0	0	0	0	0	0	0	0	0	0	0	0	0	0	0	0	0	0	0	0	0	0	0	0	0	0	0	0	0	0	0	0	0	0	0	0	0	0	0	0	0.0849787	0	0	0	0	0	0
AC091917.3	0	0.0996123	0	0	0	0	0	0	0	0	0	0	0	0	0	0.114224	0	0	0	0	0	0	0	0	0	0	0	0	0	0	0	0	0	0	0	0	0	0	0	0	0	0	0	0	0	0	0	0	0
AC091917.2	0	0.0730557	0	0	0	0	0	0	0	0	0	0	0	0	0	0	0	0	0.194046	0	0	0	0	0	0	0	0	0	0	0	0	0	0	0	0	0	0	0	0	0	0	0	0	0	0	0	0	0	0.169185
AC091917.1	0	0	0	0	0	0	0	0	0	0	0	0	0	0	0	0	0	0	0	0	0	0	0	0	0	0	0	0	0	0	0	0	0	0	0	0	0	0	0	0	0	0	0	0	0	0	0	0	0
AC012603.1	0.151365	0.21739	0.0907908	0.497666	0.569388	0.338794	0	0.377232	0.119629	0	0.417482	0.17368	0.381855	0.240385	0	0.359215	0.327714	0.380608	0.124799	0.418765	0.291321	0.49647	0	0.185666	0.48928	0.374976	0.567303	0.26567	0.156336	0.360777	0.364275	0	0.142431	0.114837	0.115181	0	0.242365	0.331093	0.350529	0.103693	0.328341	0	0.140425	0.0844284	0.401715	0.129128	0.126244	0.139558	0.612429
LINC01848	0	0.21739	0	0	0	0	0	0	0	0	0	0	0	0	0	0	0	0	0	0	0	0	0	0	0	0	0	0	0	0	0	0.186749	0	0	0	0	0	0	0	0	0	0	0	0	0	0	0	0	0
AC010395.1	0	0	0	0	0	0	0	0	0	0	0	0	0	0	0	0	0	0	0	0	0	0	0	0	0	0	0	0	0	0	0	0	0	0	0	0	0	0	0	0	0	0	0	0	0	0	0	0	0
EPB41L4A-DT	0.478752	0.381041	0.397986	0.353331	0.527747	0.82587	0.352631	0.570119	0.355765	0.619757	0.549466	0.477213	0.31835	0.389041	0.243884	0.505417	0.452112	0.639722	0.720098	0.363123	0.60694	0.0847062	0.378048	0.462889	0.325289	0.739595	0.382237	0.848483	0.551606	0.616453	0.640653	0.369156	0.508391	0.550858	0.5876	0.229304	0.550858	0.481778	0.338172	0.540795	0.473073	0.352631	0.34213	0.618843	0.304023	0.698474	0.639722	0.651462	0.441409
LINC02200	0	0	0	0	0	0	0	0	0	0	0	0	0	0	0	0	0	0	0	0	0	0	0	0	0	0	0	0	0	0	0	0	0	0	0	0	0	0	0	0	0	0	0	0	0	0	0	0	0
LINC01957	0	0	0	0	0	0	0	0	0	0	0	0	0	0	0	0	0	0	0	0	0	0	0	0	0	0	0	0	0	0	0	0	0	0	0	0	0	0	0	0	0	0	0	0	0	0	0	0	0
AC094104.2	0	0	0	0	0	0	0	0	0	0	0	0	0	0	0	0	0	0	0	0	0	0	0	0	0	0	0	0	0	0	0	0	0	0	0	0	0	0	0	0	0	0	0	0	0	0	0	0	0
AC094104.1	0	0	0	0	0	0	0	0	0	0	0	0	0	0	0	0	0	0	0	0	0	0	0	0	0	0	0	0	0	0	0	0	0	0	0	0	0	0	0	0	0	0	0	0	0	0	0	0	0
AC008549.2	0.112465	0	0.0561975	0.146309	0	0	0	0.101316	0.0899951	0	0	0	0	0	0	0	0.155547	0	0	0.113929	0.0721797	0	0	0	0	0.140425	0	0	0	0	0	0.133048	0	0	0	0	0	0.226969	0	0	0	0	0	0	0	0	0	0	0
AC008549.1	0	0	0	0	0	0	0	0	0	0	0	0	0	0	0	0.101116	0	0	0	0	0	0	0	0	0	0	0	0	0	0	0	0	0	0	0	0	0	0	0	0	0.144911	0	0	0	0	0	0	0	0
AC034236.3	0	0.491626	0	0	0.190473	0	0	0	0.36645	0.454969	0.150203	0.521828	0	0.209771	0	0.305903	0.282152	0.181273	0	0	0.331093	0	0	0.216963	0.172296	0	0	0.166069	0	0	0.126915	0	0.172496	0.264915	0.138051	0	0.293891	0.38741	0	0	0.23264	0.256343	0.30865	0.408389	0	0	0.151652	0.186895	0
AC018752.1	0	0	0	0	0	0	0	0	0	0	0	0	0	0	0	0	0	0	0	0.835098	0.668546	0	0	0	0	0	0	0	0	0	0	0	0	0	0	0	0	0	0	0	0	0	0	0	0	0	0	0.844363	0
SEMA6A-AS2	0	0	0.0996123	0	0.296311	0.188935	0	0	0	0	0.381474	0	0	0.0938491	0.258128	0	0	0	0	0	0	0	0	0.208386	0	0.125759	0.16439	0	0	0.156538	0.118688	0.205824	0.161708	0.254765	0	0	0	0	0.148561	0	0	0.130815	0	0	0	0.15674	0	0	0.169185
LINC02214	0	0	0	0	0	0	0	0	0	0	0	0	0	0	0	0	0	0	0	0	0	0	0	0	0	0	0	0	0	0	0	0	0	0	0	0	0	0	0	0	0	0	0	0	0	0	0	0	0
AC010267.1	0	0	0	0	0	0	0	0	0	0	0	0	0	0	0	0	0.118352	0	0	0	0	0	0	0	0	0	0	0	0	0	0	0	0	0	0	0	0	0	0	0	0	0	0	0	0	0	0	0	0
AC093534.2	0	0	0	0	0	0	0	0	0	0	0	0	0	0	0	0	0	0	0	0	0	0	0	0	0	0	0	0	0	0	0	0	0	0	0	0	0	0	0	0	0	0	0	0	0	0	0	0	0
LINC00992	0.919957	0.993036	0.332029	1.67971	1.11343	2.19268	1.64056	1.15455	0.888913	0.999623	1.48098	1.00293	1.07869	0.666758	1.33083	1.23138	1.39564	1.95873	1.14124	1.43746	1.20172	0.827192	1.5836	0.658634	1.78099	1.61162	1.41517	1.2577	1.65763	1.51268	0.919957	1.3087	2.42791	1.89052	0.883043	1.42745	1.89585	1.78099	1.47406	1.61162	1.15018	1.03965	1.68426	1.6983	1.51656	1.43072	0.970361	0.821721	1.25501
LINC02147	0	0	0.125699	0	0.0996802	0	0.144781	0	0	0	0	0	0	0.0601399	0	0	0.155547	0	0	0	0.0844284	0	0	0	0	0	0	0	0	0	0.0612724	0	0.0987503	0	0	0	0	0	0.0752674	0	0.115602	0	0	0	0	0	0	0	0
LINC02148	0	0.0489065	0	0	0	0	0	0	0	0	0	0	0	0	0	0	0.0605955	0	0	0	0	0	0	0	0	0	0	0	0	0	0	0	0	0.0734772	0	0	0	0.0996123	0	0	0	0	0	0	0	0.052235	0	0	0
LINC02208	0.0580408	0	0.0353593	0	0	0	0	0.186089	0	0	0.0391027	0.0929584	0	0.0227751	0	0	0	0.0501565	0	0.0557975	0	0	0	0	0.0479195	0.0386052	0	0.0504427	0.0544015	0	0	0.0675734	0.0475765	0.0860821	0	0	0	0	0	0	0	0.0523496	0.0754249	0.0504427	0	0	0	0	0.069478
LINC02216	0	0	0	0	0	0	0	0	0	0	0	0	0	0	0	0	0	0	0	0	0	0	0	0	0	0	0	0	0	0	0	0	0	0	0.0986464	0	0	0	0	0	0	0	0	0	0	0	0	0	0
LINC02215	0	0	0	0	0	0	0	0	0	0	0	0	0	0	0	0	0	0	0	0	0	0	0	0	0	0	0	0	0	0	0	0	0	0	0	0	0	0	0	0	0	0	0	0	0	0.129128	0	0	0
AC093206.1	0.170979	0	0.245663	0.21113	0	0	0	0	0	0	0	0.353712	0	0.186602	0	0	0.143923	0	0	0	0	0	0	0.108409	0	0.112899	0.503179	0	0.170241	0.156538	0	0.195362	0.280533	0	0.12744	0.280533	0	0	0	0.318715	0	0	0	0.0958273	0	0	0	0	0.169185
AC008574.1	0	0	0	0	0	0	0	0	0	0	0	0	0	0	0	0	0	0	0	0	0	0	0	0	0	0	0	0	0	0	0	0	0	0	0	0	0	0	0	0	0	0	0	0	0	0	0	0	0
AC113418.1	0	0	0	0	0	0	0	0	0	0	0	0	0	0	0	0	0	0	0	0	0	0	0	0	0	0.112899	0	0	0	0	0	0	0	0	0	0	0	0	0	0	0	0	0	0	0	0	0	0	0
AC114284.1	0	0	0.116846	0.117784	0.0699922	0.136828	0	0.0737704	0.064601	0	0.122224	0	0.0451138	0.142766	0.125818	0	0	0.159604	0.119087	0.326487	0	0.1433	0	0.176089	0	0.185432	0.10493	0	0.117784	0.074768	0.112134	0.133048	0.0765726	0	0.0521681	0	0	0.19968	0	0.0763144	0	0	0.0675734	0.132491	0	0.328341	0.0824789	0	0.069478
AC008568.1	0	0	0	0	0	0	0	0	0	0	0	0	0	0	0	0	0	0	0	0	0	0	0	0	0	0	0	0	0	0	0	0	0	0	0	0	0	0	0	0	0	0	0	0	0	0	0	0	0
AC113349.1	0	0	0	0	0	0	0	0	0	0	0	0	0	0	0	0	0	0	0	0	0	0	0	0	0	0	0	0	0	0	0	0	0	0	0	0	0	0	0	0	0	0	0	0	0	0	0	0	0
LINC02201	0	0	0	0	0	0	0	0	0	0	0	0	0	0	0	0	0	0	0	0	0	0	0	0	0	0	0	0	0	0	0	0	0	0	0	0	0	0	0	0	0	0	0	0	0	0	0	0	0
LINC01170	0.121548	0	0	0	0	0	0	0	0	0	0	0	0	0	0	0	0	0	0	0	0	0.1433	0	0	0	0	0.215476	0	0	0	0	0	0	0	0	0	0	0	0	0	0	0	0	0	0	0	0	0	0
AC016556.1	0	0	0	0	0	0	0	0	0	0	0	0	0	0	0	0	0	0	0	0	0	0	0	0	0	0	0	0	0	0	0	0	0	0	0	0	0	0	0	0	0	0	0	0	0	0	0	0	0
AC025465.2	0	0	0	0	0	0	0	0	0	0	0	0	0	0	0	0	0	0	0	0	0	0	0	0	0	0	0	0	0	0	0	0	0	0	0	0	0	0	0	0	0	0	0	0	0	0	0	0	0
AC025465.4	0	0	0	0	0	0	0	0	0	0	0	0	0	0	0	0	0	0	0	0	0	0	0	0	0	0	0	0	0	0	0	0	0	0	0	0	0	0	0	0	0	0	0	0	0	0	0	0	0
AC025465.3	0	0	0	0	0	0	0	0	0	0	0	0	0	0	0	0	0	0	0	0	0	0	0	0	0	0	0	0	0	0	0	0	0	0	0	0	0	0	0	0	0	0	0	0	0	0	0	0	0
AC025465.1	0	0	0	0	0	0	0	0	0	0	0	0	0	0	0	0	0	0	0	0	0	0	0	0	0	0	0	0	0	0	0	0	0	0	0	0	0	0	0	0	0	0	0	0	0	0	0	0	0
LINC02240	0	0	0	0	0	0	0	0	0	0	0	0	0	0	0	0	0	0	0	0	0	0	0	0	0	0	0	0	0	0	0	0	0	0	0	0	0	0	0	0	0	0	0	0	0	0	0	0	0
AC109464.1	0	0	0	0	0	0	0	0	0	0	0	0	0	0	0	0	0	0	0	0	0	0	0	0	0	0	0	0	0	0	0	0	0	0	0	0	0	0	0	0	0	0	0	0	0	0	0	0	0
AC109464.2	0	0	0	0	0	0	0	0	0	0	0	0	0	0	0	0	0	0	0	0	0	0	0	0	0	0	0	0	0	0	0	0	0	0	0	0	0	0	0	0	0	0	0	0	0	0	0	0	0
AC109471.1	0	0	0	0	0	0	0	0	0	0	0	0	0	0	0	0	0	0	0	0	0	0	0	0	0	0	0	0	0	0	0	0	0	0	0	0	0	0	0	0	0	0	0	0	0	0	0	0	0
LINC02039	0	0	0	0	0	0	0	0	0	0	0	0	0	0	0	0	0	0	0	0	0	0	0	0	0	0	0	0	0	0	0	0	0	0	0	0	0	0	0	0	0	0	0	0	0	0	0	0	0
LMNB1-DT	0	0	0	0	0	0	0	0	0	0	0	0	0	0	0	0	0	0	0	0	0	0	0	0	0	0	0	0	0	0	0	0	0	0	0	0	0	0	0	0	0	0	0	0	0	0	0	0	0
AC010424.2	0	0	0	0	0	0	0	0	0	0	0	0	0	0	0	0	0	0	0	0	0	0	0	0	0	0	0	0	0	0	0	0	0	0	0	0	0	0	0	0	0	0	0	0	0	0	0	0	0
AC068658.1	0	0	0	0	0	0	0	0	0	0	0	0	0	0	0	0	0	0	0	0	0	0	0	0	0	0	0	0	0	0	0	0	0	0	0	0	0	0	0	0	0	0	0	0	0	0	0	0	0
LINC01184	3.38983	2.91404	2.79329	3.71703	3.71703	3.76285	2.69937	3.3719	3.04427	2.67559	4.09222	3.35397	3.27929	3.07546	3.04427	3.42641	3.27929	2.58798	2.3388	3.67179	2.83288	3.46468	2.7468	2.84667	3.63119	3.42641	3.04427	4.03586	3.38983	3.07546	3.10824	3.63119	3.15822	4.14837	3.92243	3.17555	2.92872	2.63113	3.27929	3.07546	3.46468	3.76285	2.7468	3.76285	3.2096	3.58608	2.72363	2.35747	4.26934
AC063976.1	0	0	0	0	0	0	0	0	0	0	0	0	0	0	0	0	0	0	0	0	0	0	0	0	0	0	0	0	0	0	0	0	0	0	0	0	0	0	0	0	0	0	0	0	0	0	0	0	0
AC004775.1	0.102862	0	0	0.23674	0	0.107146	0	0.101316	0.138539	0	0.137099	0	0.130873	0	0	0.0903218	0	0	0	0	0.0721797	0	0	0	0	0	0	0	0.105873	0.229304	0.175923	0	0.423908	0.208386	0.0723851	0	0	0.292212	0	0.178386	0	0	0	0.268078	0.153667	0.0738419	0.197508	0	0
AC010240.3	0	0	0.144781	0	0	0	0.258855	0	0	0	0	0	0	0	0	0	0	0	0	0	0.172695	0	0	0	0	0	0.228841	0	0	0.213785	0	0	0	0	0	0	0	0	0.19989	0	0	0	0	0	0	0	0	0	0
WSPAR	0.112465	0	0	0	0.117042	0	0	0	0	0	0	0	0	0	0	0	0	0	0.0615802	0	0	0	0	0	0	0	0	0	0	0	0	0	0	0	0	0	0	0	0	0	0	0	0	0	0	0	0	0	0
AC008608.2	0.382717	1.35647	0.759484	1.23938	0.222696	0.943058	0.762833	0.767191	0.437567	1.28677	1.27826	1.00293	0.755853	0.62636	0.762833	1.59545	0.181428	1.29211	0.59353	1.44696	0.753593	1.00128	0.800055	1.38694	0.550858	0.761679	1.03569	0	1.1156	1.30317	0.615046	0.669574	1.58753	0.913907	1.2577	0	0.893261	0.980715	0.638824	0.728273	0.473073	0.674915	0.682343	0.591943	0	0.991272	0.567303	0.651462	0
AC104109.2	0.0664163	0.119887	0.144781	0.135816	0.222696	0.366012	0.144781	0.257865	0.159497	0.136141	0.237061	0.285853	0.193256	0.171139	0.32676	0.256083	0.168686	0.12437	0.0986464	0.326487	0.3096	0.31441	0.122371	0.19968	0.25426	0.207659	0.148781	0.283117	0.316762	0.386174	0.136637	0.3894	0.245938	0.356398	0.233039	0.133206	0.219951	0.121937	0.0541223	0.304254	0.182749	0.296696	0.202834	0.149118	0.252022	0.1433	0.184029	0	0.302008
AC109454.3	0	0.0825679	0	0	0	0.121716	0	0	0	0	0.0947576	0	0.0699922	0	0	0	0	0	0	0	0	0	0	0.064504	0	0.0684425	0	0	0.117784	0.102015	0	0	0	0	0	0	0	0	0.102299	0	0	0	0	0.0605955	0	0	0	0	0
AC005355.1	0	0	0	0	0	0	0	0	0	0	0	0	0	0	0	0	0	0	0.228138	0	0	0	0	0	0	0	0	0	0	0	0	0	0	0	0.0723851	0	0	0	0	0.0763144	0	0	0	0	0	0	0	0	0
LINC01843	0.209373	0.512945	0.612429	0.156897	0.410044	0.188935	0.271674	0.241908	0.064601	0.407939	0.707402	0	0.215476	0.247329	0.353712	0.347746	0.282152	0.215268	0.119087	0.577125	0.184631	0.0946503	0	0.610157	0.714133	0.533679	0.273856	0.713166	0.582737	0.188388	0.330421	0.464355	0.0765726	0.32583	0.267194	0.145141	0.349063	0.347049	0.350529	0.339495	0.736509	0.568656	0.599313	0.408389	0.187894	0.289323	0.313554	0.281781	0.429875
C5orf66-AS1	0	0	0	0	0	0	0.108051	0	0.138539	0	0	0	0	0	0.243884	0	0	0	0.0849028	0	0	0	0	0.0552087	0	0	0	0	0	0	0.052302	0	0	0	0	0	0	0	0	0	0	0	0	0	0	0	0	0	0.312259
AC008406.2	0	0	0	0	0	0	0	0	0	0	0	0	0	0	0	0	0	0	0	0	0	0	0	0	0	0	0	0	0	0	0	0	0	0	0	0	0	0	0	0	0	0	0	0	0	0	0	0	0
AC008406.1	0	0	0	0	0	0	0	0	0	0	0	0	0	0	0	0	0	0	0	0	0	0	0	0	0	0	0	0	0	0	0	0	0	0	0	0	0	0	0	0	0	0	0	0	0	0	0	0	0
C5orf66-AS2	0	0	0	0	0	0	0	0	0	0	0	0	0	0	0	0	0	0	0	0	0	0	0	0	0	0	0	0	0	0	0	0	0	0	0	0	0	0	0	0	0	0	0	0	0	0	0	0	0
AC002428.1	0	0	0	0	0	0	0	0	0.0813551	0	0	0	0	0	0	0	0	0	0	0	0	0	0	0	0	0	0	0	0	0	0.0612724	0	0	0	0	0	0	0	0	0	0	0	0	0	0	0	0	0	0
AC063980.1	0	0	0	0	0	0	0	0	0	0	0	0	0	0	0	0	0	0	0	0	0	0	0	0	0	0	0	0	0	0	0	0	0	0	0	0	0	0	0	0	0	0	0	0	0	0	0	0	0
AC109439.2	0	0	0	0	0	0	0	0	0	0	0	0	0	0	0	0	0	0	0	0	0	0	0	0	0	0	0	0	0	0	0	0	0	0	0	0	0	0	0	0	0	0	0	0	0	0	0	0	0
AC106791.2	0	0	0	0	0	0	0	0	0	0	0	0	0	0	0	0	0	0	0.107684	0	0	0	0	0	0.238171	0	0	0	0.254765	0	0	0	0	0	0	0	0.219951	0	0	0	0	0	0	0	0	0.214781	0.184029	0	0.244208
SNHG4	1.23938	1.26527	0.479781	0.977166	1.11343	1.37742	0.887458	0.634585	1.00992	0.388633	2.01427	0.137522	1.60406	0.936734	1.13491	0.707402	0.690903	0.798692	0.699395	0.928783	0.518755	0.49647	1.51656	0.357678	1.59149	1.34748	1.22886	1.79989	0.755853	1.35035	1.44059	1.6983	0.489912	0.611655	1.10285	0.19968	0.487786	1.87045	0.687021	0.971885	1.00466	1.48767	1.66205	1.84024	0.428951	0.61793	0.970361	2.44713	1.44373
AC113361.1	0	0	0.0809582	0	0	0	0.163449	0	0	0	0.122224	0	0	0.0826448	0	0	0	0.147819	0	0	0.0990901	0	0	0.0983859	0.141664	0.364275	0	0.135283	0	0	0.185142	0	0	0	0	0	0.126691	0	0	0	0.182749	0	0	0	0	0	0	0.139558	0.139955
CXXC5-AS1	0	0.0996123	0	0	0	0	0.153295	0	0	0	0.276182	0	0.0847062	0.0707	0.353712	0	0.295672	0	0.113712	0.152547	0	0	0	0	0	0.258353	0.228841	0.123129	0.241908	0.213785	0	0	0	0	0	0	0	0	0	0	0.296696	0	0	0.072017	0	0	0	0.506705	0.244208
AC008667.1	0	0	0	0	0	0	0	0.227542	0	0	0	0	0	0	0	0	0	0	0	0	0	0.178386	0	0.0860821	0	0	0.118201	0	0	0	0	0	0	0	0	0	0	0	0	0	0	0	0	0	0	0	0	0	0
AC008667.3	0	0	0	0	0	0.152547	0	0	0	0	0	0	0	0	0	0	0	0	0	0	0.0990901	0	0	0	0	0	0	0	0	0	0.100939	0.30865	0	0.208386	0	0	0	0	0	0	0	0	0	0.0844284	0	0	0	0	0.139955
AC244517.9	0	0	0	0	0	0	0	0	0	0	0	0	0	0	0	0	0	0	0	0	0	0	0	0	0	0	0	0	0	0	0	0	0	0	0	0	0	0	0	0	0	0	0	0	0	0	0	0	0
AC244517.1	0.198802	0.190473	0.231486	0.0890443	0.173082	0.0678785	0.117503	0.20092	0.129639	0.980715	0.164238	0.154765	0.215476	0.0826448	0.147045	0.13929	0.367647	0.407589	0.169274	0.171898	0.0721797	0	0.134235	0.0552087	0.141664	0.404347	0.16439	0.105298	0.156336	0.258353	0.185142	0.152237	0.0765726	0.181745	0.138051	0.19968	0.126691	0.212558	0.17368	0.0889081	0.105362	0.0886302	0.163601	0.201231	0.187894	0.214781	0.292575	0.225495	0.201814
AC005618.1	0.151365	0.0730557	0.166369	0.180173	0.137099	0.152547	0.108051	0.137369	0.0465857	0.25426	0.107146	0.154765	0.193256	0.171139	0.147045	0.0614331	0.218662	0.135025	0.119087	0.276886	0.0498668	0.233204	0.0895155	0.0860821	0.0721797	0.112899	0.0496398	0.0585187	0.105873	0.0625547	0.175923	0.0789544	0.142431	0.0615802	0.0986464	0	0.232194	0.167156	0.0541223	0.224267	0.144911	0.222233	0.0849787	0.072017	0.102924	0.0976288	0.292575	0.0816648	0.0570073
AC005753.1	0	0	0.177617	0.167542	0	0.264267	0	0	0.0994543	0.3164	0	0	0	0.136141	0.32676	0.114224	0.412059	0.226334	0	0.446302	0	0.159604	0.198802	0.146026	0	0	0	0.218791	0.130757	0.115687	0.418347	0.152237	0.21113	0.338483	0.382237	0	0.197072	0.151365	0	0	0.266272	0.0886302	0	0.277605	0.335028	0	0.170979	0.454111	0
AC005592.1	0	0	0.0416362	0	0	0	0	0	0.0730065	0	0.0502059	0	0.0451138	0.0258953	0	0	0	0	0.0415507	0.0703533	0.0498668	0	0	0	0	0	0	0	0.0660083	0	0	0	0	0.0425379	0.0428617	0	0	0.110616	0	0	0	0	0	0	0	0	0	0	0
LINC01844	0	0	0.0416362	0	0	0.152547	0	0	0.0899951	0.11133	0.0391027	0	0.0847062	0.0227751	0	0	0.0605955	0.0570073	0.0456669	0.0840091	0.038132	0	0	0.064504	0	0	0	0.0504427	0	0.0502553	0.0398842	0	0.0669142	0.0349649	0.0353593	0.145141	0	0	0.0428617	0.036151	0	0	0	0.0308068	0	0	0.0953538	0.0584458	0
AC016598.1	0	0	0	0	0	0	0	0	0	0	0	0	0	0	0	0	0	0	0	0	0	0	0	0	0	0	0	0	0	0	0	0	0	0	0	0	0	0	0	0	0	0	0	0	0	0	0	0	0
AC016598.2	0	0	0	0	0	0	0	0	0	0	0	0	0	0	0	0	0	0	0	0	0	0	0	0	0	0	0	0	0	0	0	0	0	0	0	0	0	0	0	0	0	0	0	0	0	0	0	0	0
AC137770.1	0.151365	0.119887	0.0907908	0	0.156224	0	0	0	0	0	0	0.32676	0	0	0	0	0	0.147819	0.124799	0	0	0.198081	0	0	0	0.0973112	0	0	0	0	0.100939	0	0	0	0	0.466424	0	0	0	0	0.182749	0	0	0	0	0	0	0	0
AC008700.1	0	0	0	0	0	0	0	0	0	0	0	0	0.0699922	0.0508555	0	0	0	0	0	0.187894	0	0	0	0	0	0	0	0	0	0	0	0	0	0	0	0	0.102299	0	0	0	0	0	0	0	0	0.0976288	0	0	0
AC011396.1	0	0	0	0	0	0	0	0	0	0	0	0	0	0	0	0	0	0	0	0	0	0	0	0	0	0	0	0	0	0	0	0	0	0	0	0	0	0	0	0	0	0	0	0	0	0	0	0	0
SH3TC2-DT	0	0.0489065	0.0303587	0	0.190473	0	0	0	0.0813551	0	0.0391027	0.12273	0	0	0	0	0	0	0	0.113929	0.0721797	0	0	0	0	0	0	0.166069	0	0	0	0	0	0	0	0	0.113783	0	0.0428617	0	0	0.101474	0.049917	0	0	0.187343	0	0	0.0461531
CARMN	0.35149	0.451024	0.52414	0.584295	0.425567	0.518051	0.231982	0.597035	0.609427	0.119319	0.429875	0.252474	0.291848	0.672301	0.383635	0.371223	0.327714	0.169467	0.720098	0.259131	0.395688	0.444983	0.554821	0.36687	0.550858	0.993036	0.458035	0.363874	0.606176	0.509057	0.769246	0.175756	0.320129	0.611655	1.17789	0.796144	0.679444	0.727251	0.429413	0.304254	0.328341	0.394804	0.392465	1.07869	0.890368	0.883043	0.250763	0.49647	0.382717
AC131025.2	0	0.20052	0	0.108305	0.207007	0	0.0688976	0	0	0.227727	0	0.12273	0	0	0	0.324955	0	0	0.149278	0	0.115815	0	0.144026	0	0	0	0	0	0.423399	0	0	0	0	0	0	0.119758	0	0	0	0	0	0	0.363498	0.645668	0.0896522	0	0	0.407238	0
NDST1-AS1	0	0	0	0	0	0.556658	0.311183	0.241908	0.521223	0	0.429875	0	0	0	0	0	0.581424	0.487285	0.409206	0.259131	0	0.342451	0.400725	0	0	0	0	0	0	0.244765	0.185142	0	0.245938	0	0.196669	0	0.434966	0	0	0.355765	0	0	0	0.158984	0	0	0	0	0
AC008641.1	0.634585	0	0	0	0	0	0	0.541391	0	0	0	0	0	0	0	0	0	0	0	0.543364	0	0	0	0	0	0.441872	0.610906	0	0	0	0	0	0	0	0	0	0	0	0	0	0	0	0	0	0	0	0	0	0.604142
AC011374.2	0.572522	0.396802	0.720098	0.196086	1.13491	0.469764	0.534811	0.257865	1.00992	0.644778	1.0767	0.853676	0.631421	0.759484	1.08879	0.749235	0.794989	0.776173	0.607818	0.293349	0.900721	0.373688	1.02985	0.727251	0.878782	0.549466	0.471705	0.26567	0.813211	0.360777	0.853676	1.1684	0.650741	0.570994	0.635336	0.777363	0.851043	0.452689	0.740638	1.00128	0.592736	0.504799	0.733323	0.711273	1.06274	1.00128	0.650741	0.844363	0.697552
AC091982.3	0.34213	0.537291	0.984265	0.252688	0.253687	0.121716	0.213944	0.53302	0.650741	0.847201	0.919957	0.32676	0.717008	0.550162	0.624466	0.840349	0.282152	0.588984	0.0898529	0.259131	0.617191	0.386174	0.531704	0.42801	0.82587	0.465257	0.780876	0.673193	0.832366	0.637927	0.355404	0.62124	0.640653	0.913907	0.669574	0.335028	0.819153	0.534245	0.408389	0.939747	0.856309	0.612429	0.37599	0.495852	0.581424	0.596339	0.629741	0.56662	0.580789
LINC01861	0	0	0	0	0	0	0	0	0	0	0	0	0	0	0	0	0	0	0	0	0	0	0	0	0	0	0	0	0	0	0	0	0	0	0	0	0	0	0	0	0	0	0	0	0	0	0	0	0
AC091962.1	0	0	0	0	0	0	0	0	0	0	0	0	0	0	0	0	0	0	0	0	0	0	0	0	0	0	0	0	0	0	0	0	0	0	0	0	0	0	0	0.0451138	0	0	0	0	0.102924	0	0	0	0
AC025437.5	0	0	0	0	0	0	0	0	0	0	0	0	0	0	0	0	0	0	0	0	0	0	0	0	0	0	0	0	0	0	0	0	0	0	0	0	0	0	0	0	0	0	0	0	0	0	0	0	0
AC025437.4	0	0	0	0	0	0	0	0	0	0	0	0	0	0	0	0	0	0	0	0	0	0	0	0	0	0	0	0	0	0	0	0	0	0	0	0	0	0	0	0	0	0	0	0	0	0	0	0	0
AC025437.3	0	0	0	0	0	0	0	0	0	0	0	0	0	0	0	0	0	0	0	0	0	0	0	0	0	0	0	0	0	0	0	0	0	0	0	0	0	0	0	0	0	0	0	0	0	0	0	0	0
AC025437.1	0	0	0	0	0	0	0	0	0	0	0	0	0	0	0	0	0	0	0	0	0	0	0	0	0	0	0	0	0	0	0	0	0	0	0	0	0	0	0	0	0	0	0	0	0	0	0	0	0
LINC02227	0	0	0	0	0	0	0	0	0	0	0	0	0	0	0	0	0	0	0	0	0	0	0	0	0	0	0	0	0	0	0	0	0	0	0	0	0	0	0	0	0	0	0	0	0	0	0	0	0
AC091979.1	0	0	0	0	0	0	0	0	0	0	0	0	0	0	0	0	0	0	0	0	0	0	0	0	0	0	0	0	0	0	0	0	0	0	0	0	0	0	0	0	0	0	0	0	0	0	0	0	0
AC091979.2	0	0	0	0	0	0	0	0	0	0	0	0	0	0	0	0	0	0	0	0	0	0	0	0	0	0	0	0	0	0	0	0	0	0	0	0	0	0	0	0	0	0	0	0	0	0	0	0	0
LINC02202	0.102862	0.654973	1.13291	0.634585	0.296311	0.750273	0.463881	0.597035	0.697552	0.327033	0.717008	0.12273	0.34402	0.291848	0.229831	0.244965	0.62636	0.181273	0.404924	0.648297	0.412982	1.00128	0.735502	0.727251	1.35035	0.845782	0.567303	0.679444	1.23138	1.16614	0.175923	0.398407	0.76624	1.01712	0.78911	0.3164	0.469207	0	0.674915	0.665998	0.105362	0.721106	0.23072	1.02446	0.498776	0.783213	0.728273	0.125263	0.580789
LINC01932	0	0	0	0	0	0	0	0	0	0	0	0	0	0	0	0	0	0	0	0	0	0	0	0	0	0	0	0	0	0	0	0	0	0	0	0	0	0	0.213413	0	0	0	0	0	0	0	0	0	0
LINC01845	0	0	0	0	0	0	0	0	0	0	0	0	0	0	0	0	0	0	0	0	0	0	0	0	0	0	0	0	0	0	0	0	0	0	0	0	0	0	0	0	0	0	0	0	0	0	0	0	0
LINC02159	0.0580408	0.0489065	0	0.0890443	0	0.0678785	0.0759626	0.0874334	0	0.119319	0.0831862	0	0.0699922	0	0.116056	0.114224	0.0413799	0.237715	0.0502827	0.113929	0.0610902	0	0.154765	0.064504	0.123	0	0.181119	0.0504427	0.267469	0.229304	0.0455534	0.3214	0.0876759	0	0.0353593	0.119758	0.0621069	0.0996123	0	0.0653709	0.125699	0.0523496	0.173244	0.0262927	0.129713	0.0416868	0.0953538	0	0.069478
LINC01202	0	0	0	0	0	0	0	0	0	0	0	0	0	0	0	0	0	0	0	0	0	0	0	0	0	0	0	0	0	0	0	0	0	0	0	0	0	0	0	0	0	0.0639811	0	0	0	0	0	0	0
AC008662.1	0	0	0	0	0	0	0	0	0	0	0	0	0	0	0	0	0	0	0	0	0	0	0	0	0	0	0	0	0	0	0	0	0	0	0	0	0	0	0	0	0	0	0	0	0	0	0	0	0
AC008662.2	0	0	0	0	0	0	0	0	0	0	0	0	0	0	0	0	0	0	0	0	0	0	0	0	0	0	0	0	0	0	0	0	0	0	0	0	0	0	0	0	0	0	0	0	0	0	0	0	0
LINC02143	0	0	0	0	0	0	0	0	0	0	0	0	0	0	0	0	0	0	0	0	0	0	0	0	0	0	0	0	0	0	0	0	0	0	0	0	0	0	0	0	0	0	0	0	0	0	0	0	0
LINC01938	0.0580408	0	0	0	0	0	0	0	0	0	0	0	0	0	0	0	0	0	0	0	0	0	0	0	0	0	0	0	0	0	0	0	0	0	0	0	0	0	0	0	0	0	0	0	0	0	0	0	0
AC008415.1	0	0	0	0	0	0	0	0	0	0	0	0	0	0	0	0	0	0	0	0	0	0	0	0	0	0	0	0	0	0	0	0	0	0	0	0	0	0	0	0	0	0	0	0	0	0	0	0	0.0941273
AC114321.1	0	0	0	0	0	0	0	0	0	0	0	0	0	0	0	0	0	0	0	0	0	0	0	0	0	0	0	0	0	0	0	0	0	0	0	0	0	0	0	0	0	0	0	0	0	0	0	0	0
AC091819.2	0	0	0	0	0	0	0	0	0	0	0	0	0	0	0	0	0	0	0	0	0	0	0	0	0	0	0	0	0	0	0	0	0	0	0	0	0	0	0	0	0	0	0	0	0	0	0	0	0
AC091819.1	0	0	0	0	0	0	0	0	0	0	0	0	0	0	0	0	0	0	0	0	0	0	0	0	0	0	0	0	0	0	0	0	0	0	0	0	0	0	0	0	0	0	0	0	0	0	0	0	0
LINC01187	0.0921472	0.0395809	0.0486975	0.108305	0.26839	0	0	0.0618092	0.170027	0.0935807	0.0391027	0	0.0699922	0.0938491	0	0.0903218	0	0	0	0	0.038132	0.0731268	0	0.046865	0	0.0386052	0.0406721	0	0.117784	0.0502553	0.0699367	0.0896522	0.0669142	0.0515669	0.0723851	0.280533	0.0621069	0	0.148561	0	0.105362	0.0639811	0.140425	0	0	0.1433	0.0362386	0.0584458	0
AC034199.1	0	0.0639811	0	0	0	0	0	0	0	0	0.0391027	0	0	0.0938491	0	0	0.0413799	0	0	0	0	0	0	0	0	0.031098	0.0496398	0.0504427	0.095252	0	0	0	0	0	0	0	0	0	0	0	0	0	0	0	0	0	0.0362386	0	0.0461531
LINC01366	0.255892	0	0	0	0	0	0	0	0	0	0.0831862	0	0	0	0	0	0	0	0.222043	0	0	0	0	0	0.0841812	0	0	0	0	0	0	0	0	0.0615802	0	0	0	0	0	0.0889081	0	0	0	0	0	0.0738419	0.0704447	0	0
AC011410.1	0	0	0	0	0	0	0	0	0	0	0	0	0	0	0	0	0	0	0	0	0	0	0	0	0	0	0	0	0	0	0	0	0	0	0	0	0	0	0	0	0	0	0	0	0	0	0	0	0
LINC01944	0	0	0	0	0	0	0	0	0	0	0	0	0	0	0	0	0	0	0	0	0	0	0	0	0	0	0	0	0	0	0	0	0	0	0	0	0	0	0	0	0	0	0	0	0	0	0	0	0
AC110011.1	0	0	0	0	0	0	0	0	0.109161	0	0	0	0	0	0	0	0	0	0	0	0	0	0	0	0	0	0	0	0	0	0	0	0	0	0	0	0	0	0	0	0	0	0	0	0	0	0	0	0
AC008429.3	0	0	0	0	0	0.136828	0	0	0	0	0	0.192026	0	0	0	0	0	0	0	0	0	0	0	0	0	0	0	0	0	0.156538	0.0328534	0	0	0	0	0	0	0	0	0	0	0	0	0	0	0	0	0	0
AC008632.1	0	0	0	0	0	0	0	0	0	0	0	0	0	0.0938491	0	0	0.0810574	0	0	0	0	0	0	0	0	0	0.0824789	0	0	0	0	0.123774	0	0	0	0	0	0	0	0	0	0	0	0	0	0	0	0	0
AC008663.1	0	0	0	0	0	0	0	0	0	0	0	0	0	0	0	0	0	0	0	0	0	0	0	0	0	0	0	0	0	0	0	0	0	0	0	0	0	0	0	0	0	0	0	0	0	0	0	0	0.185432
AC008663.3	0	0	0.196926	0	0.190473	0.207007	0	0	0	0	0	0.211772	0	0	0	0	0	0	0	0	0.131225	0	0	0	0	0	0.181119	0.17654	0	0	0	0	0	0	0	0	0	0	0	0.128965	0	0.145484	0	0	0.285304	0	0	0	0
LINC01863	0	0	0	0	0	0	0	0	0	0	0	0	0	0.0938491	0	0	0	0	0	0	0.115815	0	0	0	0	0.220945	0	0	0	0	0	0	0	0	0	0	0.149829	0	0	0	0	0	0	0	0	0	0	0	0
LINC01942	1.61542	1.41785	1.5408	1.0592	1.38694	0.924334	1.91314	1.09507	1.18286	1.37143	0.957345	0.341102	1.17056	0.630581	0.936734	0.78211	1.50191	0.798692	1.17789	0.867408	2.13523	0.656768	0.897857	0.577125	1.37143	0.717008	1.17789	0.894699	1.13069	0.664204	1.2577	1.07264	1.61921	0.598522	1.02621	0.480383	0.984265	0.939747	1.26792	1.55606	1.37439	2.2247	1.19188	1.29744	1.46662	0.849766	1.01712	1.27568	1.98271
LINC01484	1.06851	0.908028	0.576523	0.977166	1.18706	1.16614	0.808206	0.729296	1.30022	0.506061	0.570994	0.211772	0.938241	0.464806	0.526036	0.71909	1.25501	0.518755	0.887458	0.187894	1.28956	0.735502	0.214396	0.599313	0.669574	0.488533	0.897857	0.348673	0.479781	0.360777	1.06646	0.483231	0.76624	0.598522	0.777363	0.248543	0.812003	0.727251	0.965457	0.552898	0.482224	1.23138	0.531704	0.253153	1.09081	0.581424	0.82587	0.98244	0.824472
LINC01485	0.140425	0	0	0	0.137099	0	0	0.227542	0	0.388633	0.703383	0.137522	0	0	0	0	0	0	0	0.130873	0.482224	0.797418	0	0.0739641	0.413824	0.0973112	0.242595	0.123129	0.130757	0.130446	0	0.274375	0	0.0996802	0.171139	0	0.197072	0.167156	0	0	0.166878	0.101474	0.127008	0.310471	0	0.570994	0.0953538	0	0
AC025752.1	0	0	0	0	0	0	0	0	0	0	0	0	0	0	0	0	0	0	0	0	0	0	0	0	0	0	0	0	0	0	0	0	0	0	0	0	0	0	0	0	0	0	0	0	0	0	0	0	0
LINC01411	0	0	0.0353593	0	0	0	0	0.0500885	0	0	0.0608666	0.0661714	0	0.0227751	0	0	0.0508082	0.105125	0	0	0	0.0731268	0.0991511	0	0	0.0973112	0	0.0504427	0.0660083	0.130446	0	0.0896522	0	0	0	0	0.0508555	0.087163	0.0428617	0	0.0665708	0	0	0.140733	0	0	0	0	0
AC108112.1	0	0	0	0	0	0	0	0	0	0	0	0	0	0	0	0	0	0	0	0	0	0	0	0	0	0	0	0	0	0	0	0	0	0	0	0	0	0	0	0	0	0	0	0	0	0	0	0	0
AC113346.2	0	0	0	0	0	0	0	0	0	0	0	0	0	0	0	0	0	0	0	0	0	0	0	0	0	0	0	0	0	0	0	0	0	0	0	0	0	0	0	0	0	0	0	0	0	0	0	0	0
AC113346.1	0	0	0	0	0	0	0	0	0	0	0	0	0	0	0	0	0	0	0	0	0	0	0	0	0	0	0	0	0	0	0	0	0	0	0	0	0	0	0	0	0	0	0	0	0	0	0	0	0
LINC01951	0	0	0	0	0	0	0	0	0	0	0	0	0	0	0	0	0	0	0	0	0	0	0	0	0	0	0	0	0	0	0	0	0	0	0	0	0	0	0	0	0	0	0	0	0	0	0	0	0
AC008413.2	0	0	0	0	0	0	0	0	0	0	0	0	0	0	0	0	0	0	0	0	0	0	0	0	0	0	0	0	0	0	0	0	0	0	0	0	0	0	0	0	0	0	0	0	0	0	0	0	0
AC139491.4	0.284526	0	0	0	0	0	0.352631	0	0	0	0	0	0.203494	0	0	0	0	0	0	0	0	0	0	0	0	0	0	0	0	0	0	0	0.26839	0	0	0	0	0	0	0	0	0	0	0	0	0	0	0	0.0570073
AC113391.1	0	0	0	0	0	0	0	0	0	0	0	0	0	0	0	0	0	0	0	0	0	0	0	0	0	0	0	0	0	0	0	0	0	0	0	0	0	0	0	0	0	0	0	0	0	0	0	0	0
AC113391.2	0	0	0	0	0	0	0	0	0	0	0	0	0	0	0	0	0	0	0	0	0	0	0	0	0	0	0	0	0	0	0	0	0	0	0	0	0	0	0	0	0	0	0	0	0	0	0	0	0
LINC01574	0	0	0.205117	0	0.137099	0.152547	0	0.137369	0.278786	0.201363	0.213199	0	0.102666	0	0	0.324955	0	0	0.0735347	0.276886	0.0990901	0	0.214396	0	0.123	0	0	0.123129	0	0	0.254979	0	0.431987	0.0996802	0.279244	0	0.571869	0	0	0	0.166878	0.541391	0.127008	0	0	0.243009	0	0.139558	0
AC139795.3	0.835098	0.692784	0.779643	0.736509	1.04735	0.452689	0.938241	0.454111	0.215716	0.970361	0.304254	0.832366	0.369156	0.638824	0.526036	0.971885	0.758208	0.477769	0.585765	0.152547	1.11126	0.3581	0.554821	0.176089	0.57515	0.185432	0.731322	0.838991	0.582737	0.637927	0.816785	0.679444	0.451024	0.314154	0.461822	0.248543	0.232194	0.754772	0.853676	1.0767	0.319829	0.577125	1.04934	0.687021	0.219716	0.381041	0.111051	0.139558	0.382717
AC140125.1	0	0	0	0	0	0	0	0	0	0	0	0	0	0	0	0	0	0	0	0	0	0	0	0	0	0	0	0	0	0	0	0	0	0	0	0	0	0	0	0	0	0	0	0	0	0	0	0	0
AC106795.3	0	0	0.0809582	0.328991	0.137099	0	0	0.347746	0	0.498243	0.304254	0	0	0.0707	0.214781	0.52913	0.23264	0.552898	0	0.40122	0	0.178386	0	0.391623	0.565274	0.274116	0.53302	0	0.143923	0	0.185142	0	0.354184	0.473486	0.290983	0.248543	0.402586	0	0.132626	0.268886	0.319829	0	0.140425	0.170445	0.385756	0.698474	0	0.139558	0
AC106795.5	0.468049	0.275007	0.205117	0.941402	0.325559	0.228138	0.213944	0.570119	0	0.947964	0.164238	0	0.240208	0.301421	0	0.692784	0.635336	0.487285	0	0.363123	0.241292	0.249807	0	0.735502	0.473486	0.465257	0.181119	0	0	0	0.347049	0.398407	0.320129	0	0.918509	0	0.550858	0	0	0.440486	0.23264	0.145484	0.319454	0.115371	0	0	0.281123	0.443504	0.185432
AC104117.5	0.756933	0	0.387001	0	0	0	0.285853	0.137369	0.377672	0.498243	0	0.304867	0	0.594882	0	0.335852	0.317124	0.147819	0.307328	0.152547	0.573777	0.178386	0.232873	0.176089	0	0.0973112	0	0.244208	0	0.244765	0.263065	0.175756	0	0.208386	0.290983	0	0	0	0.229016	0	0.166878	0.101474	0.140425	0.0844284	0.385756	0	0.111051	0.139558	0.260191
AC109479.3	0	0	0	0	0	0	0	0	0	0	0	0	0	0	0	0.266918	0	0	0.275007	0	0	0	0	0	0	0	0	0	0	0	0	0	0	0	0	0	0.456014	0	0	0	0	0	0	0	0	0	0	0	0
AC109479.1	0.131225	0	0.0643588	0.167542	0.207007	0.136828	0	0	0.0994543	0	0.0947576	0	0	0.0601399	0.184421	0	0	0	0	0	0	0	0	0	0	0	0.203954	0.113642	0.130757	0.115687	0.0790515	0	0	0	0.0842421	0	0	0	0.102299	0	0	0	0.114581	0.0605955	0	0	0	0	0
AC136628.1	0	0	0	0	0	0	0	0	0	0	0	0	0	0	0	0	0	0	0	0	0	0	0	0	0	0	0	0	0	0	0	0	0	0	0	0	0	0	0	0	0	0	0	0.0844284	0	0	0	0	0
AC136628.4	0	0	0	0	0	0	0	0	0	0	0	0	0	0	0	0	0	0	0	0	0	0	0	0	0	0	0	0	0	0	0	0	0	0	0	0	0	0	0	0	0	0	0	0	0	0	0	0	0
AC008393.1	0.589654	0.70552	1.47406	0.643943	0.2825	0.763987	0.662327	0.665101	0.729296	0.742685	0.623634	0.50418	0.924334	0.356398	0.573777	0.773835	0.38741	0.487285	0.275007	0.460718	0.550858	0.419196	0.290394	0.532361	0.312462	0.533679	0.370365	0.787916	0.470284	0.548797	0.472183	0.407238	0.554131	0.629741	0.342451	0.266272	0.611655	0.568656	0.568656	0.540795	0.420078	0.381041	0.352631	0.711273	0.285304	0.756933	0.597035	0.56662	0.382717
AC034213.1	0	0	0	0	0	0	0	0	0.189109	0	0	0	0	0.0420811	0	0	0	0	0	0	0.0721797	0	0.154765	0	0	0.0566978	0	0	0	0	0	0	0.0987503	0	0	0	0	0	0	0	0	0	0	0	0	0	0	0	0
LINC01962	0	0	0	0	0	0	0	0	0	0	0	0.252474	0.291848	0	0	0	0	0	0	0	0.161578	0	0	0	0	0	0	0	0	0	0	0	0	0	0	0	0.197072	0	0	0	0	0	0	0	0	0	0	0	0
AC138035.1	3.76285	3.54582	3.31792	4.40899	2.54807	3.54582	3.48537	3.63119	3.31792	3.04427	3.40812	3.27929	3.67179	3.46468	3.73994	3.50605	3.97621	2.67559	2.83288	3.94932	3.31792	2.28732	3.42641	3.58608	3.71703	3.00005	3.38983	2.97012	3.17555	3.2096	3.58608	3.46468	3.97621	2.39111	3.81408	2.2247	3.27929	3.31792	4.17776	3.46468	4.03586	3.35397	3.46468	3.04427	3.10824	3.1409	3.38983	7.53393	3.35397
AC138035.2	0.275348	0	0	0	0	0.136828	0	0.137369	0	0	0	0	0	0	0	0	0	0	0	0	0.219437	0	0	0	0	0	0	0	0	0	0.306287	0	0	0	0	0.107563	0.138884	0	0	0	0.154641	0.0523496	0.0944701	0	0	0.261859	0.126244	0	0
AL035696.3	0	0	0	0	0	0	0	0	0	0	0	0	0	0	0	0	0	0	0	0	0	0	0	0	0	0	0.0496398	0	0	0	0	0	0	0	0	0	0	0	0	0	0	0	0	0	0	0	0	0	0
AL035696.1	0	0	0	0	0	0	0	0	0	0	0	0	0	0	0	0	0	0	0	0	0	0	0	0	0	0	0	0	0	0	0	0	0	0	0	0	0	0	0	0	0	0	0	0	0	0	0	0	0
AL357054.4	0.140425	0.138051	0.297649	0.0890443	0.0841812	0	0	0	0.0899951	0	0.0608666	0.0794373	0	0.202702	0	0.0456669	0	0.0501565	0.0898529	0.0840091	0.0721797	0.0946503	0.0991511	0.046865	0.0721797	0.0386052	0.133364	0.0585187	0.0863952	0.0625547	0.213785	0.0675734	0.0765726	0.0615802	0.0353593	0	0.0621069	0.167156	0.102299	0.0451138	0.0768486	0.116056	0.0754249	0.0844284	0.0896522	0.0738419	0.0607777	0	0.0941273
AL357054.2	0	0	0	0	0	0	0	0	0	0	0	0	0	0	0	0	0	0	0	0	0	0	0	0	0	0	0	0	0	0	0.145484	0	0	0	0	0	0	0	0	0.156112	0	0	0	0	0	0	0	0	0
AL357054.3	0.0580408	0.0395809	0	0.0890443	0	0	0	0	0.0465857	0	0	0	0	0	0	0	0	0.0756927	0.0735347	0	0	0	0	0.0333572	0	0	0	0.0504427	0	0.0502553	0.0328534	0.0980296	0	0.0425379	0	0	0	0.087163	0.0428617	0	0	0.035029	0	0	0	0	0	0	0
AL356130.1	0	0.0395809	0	0	0	0	0	0	0	0	0	0	0	0	0	0	0	0	0	0	0	0	0	0	0	0	0	0	0	0	0	0	0	0	0	0.119758	0	0	0	0	0	0	0	0	0	0	0	0	0
AL033381.2	0	0	0	0	0	0	0	0	0.0813551	0	0	0	0	0	0	0	0	0	0	0	0	0	0	0	0	0	0	0	0	0	0	0	0	0	0	0	0	0	0	0	0	0	0	0	0	0	0	0	0
AL033381.1	0	0	0	0	0	0	0	0	0.0388806	0	0	0	0	0	0	0	0	0	0	0	0	0	0	0	0	0.0386052	0	0.0585187	0	0	0	0	0	0	0	0	0	0	0	0	0.0584458	0	0	0.0230708	0	0	0	0	0
LINC01394	0	0	0	0	0	0	0	0	0	0	0	0	0	0	0	0	0	0	0	0	0	0	0	0	0	0	0	0	0	0	0	0	0	0	0	0	0.349063	0	0	0	0	0	0	0	0	0.202175	0	0	0
AL512329.2	0.357678	0.20052	0.153165	0.478325	0	0.3214	0.406178	0.347746	0.206154	0	0.122224	0	0.26533	0.16296	0.383635	0.127008	0	0.147819	0.154389	0	0.184631	0	0.232873	0.176089	0.25426	0	0.133364	0	0	0.435917	0.100939	0	0	0.387001	0.196669	0	0.5876	0.184948	0.132626	0.630581	0.430385	0.296696	0.546658	0.253153	0.385756	0.129128	0.210282	0.139558	0
FOXCUT	0	0.275007	0	0	0	0	0	0	0	0	0	0	0	0	0	0	0	0	0	0	0	0	0	0	0	0	0	0	0	0	0.223522	0	0	0	0	0	0	0	0.266011	0	0	0	0	0	0	0	0	0.292575	0
GMDS-DT	2.95467	2.87438	3.42641	3.46468	3.52594	3.17555	2.92872	2.79329	3.35397	2.72363	2.50603	2.7678	2.91404	2.84667	2.87438	2.92872	3.50605	2.0699	2.87438	2.79329	1.90117	2.7468	2.48698	3.31792	3.04427	3.76285	2.62088	3.38983	2.54807	2.92872	2.23215	2.12837	3.52594	2.98557	3.27929	4.26934	2.84667	2.35747	3.54582	2.98557	3.17555	4.09222	2.2247	3.46468	4.33931	3.17555	3.04427	2.7573	3.76285
AL031768.1	0.744918	0.424418	0.235958	0.252688	0.441409	0.338794	0.520622	0.468049	0.493644	0.454969	0.522433	0.232406	0.543364	0.255284	0.394804	0.592736	0.589654	0.417482	0.571869	0.207007	0.555986	0.129456	0.609427	0.438613	0.662327	0.728273	0.515641	0.338794	0	0.102015	0.412059	0.133048	0.52346	0.219437	0.33273	1.62327	0.293891	0.76624	0.649158	0.540795	0.642346	0.408839	0.573777	0.0504427	0.622021	0.171898	0.61793	0.592736	0.580789
LINC02521	0	0	0	0	0	0	0	0	0	0	0	0	0	0	0	0	0	0	0	0	0	0	0	0	0	0	0	0	0	0	0	0	0	0	0	0	0	0	0	0	0	0	0	0	0	0	0	0	0
SERPINB9P1	0.67583	0.714133	0.864722	0.378048	0.680199	0.556658	0.153295	0.499309	1.13691	0.678689	0.381474	0.462889	0.660335	1.61162	0.800055	1.31958	0.38741	0	0.0986464	0.0703533	0.955803	1.08061	0.726227	0.046865	0.550858	1.52721	0	1.55243	0.37458	0.130446	0.0895155	1.18037	0.378048	0.231676	0.807006	0.591134	0.252474	0.980715	0.310471	0.142766	0.891823	1.18496	0.733323	1.26261	1.15018	0	0.0953538	0.728273	0.762833
LINC01011	1.48767	1.71646	1.82	2.0501	1.06851	0.718049	2.12151	1.00128	1.3446	1.50191	1.5448	1.26527	1.02621	1.85574	0.884523	1.19188	1.07869	1.35035	1.33362	0.687021	1.13491	1.53407	1.04735	1.10712	0.999623	1.05334	1.45356	1.2577	0.962161	1.33635	1.5448	0.867408	0.975341	1.3446	1.17789	0.896278	1.24968	0.808206	1.41248	1.20854	1.6983	1.20172	1.23138	1.07869	0.666758	0.756933	1.20399	1.08677	1.00293
AL031963.2	0	0	0.144781	0	0	0	0	0	0	0	0	0	0	0	0	0	0	0	0	0	0.172695	0	0	0	0	0	0	0	0	0	0	0	0	0	0	0	0	0	0	0	0	0	0	0	0	0	0	0	0
LINC02525	0	0	0	0	0	0	0	0	0	0	0	0	0	0	0	0	0	0	0	0	0	0	0	0	0	0	0	0	0	0	0	0	0.0669142	0	0	0	0	0	0	0	0	0.0429953	0	0.0308068	0	0	0	0	0
AL391422.2	0	0	0	0	0	0	0	0	0	0	0	0	0	0	0	0	0	0	0	0	0	0	0	0	0	0	0	0.17654	0	0	0	0	0	0	0	0	0	0	0	0	0	0	0	0	0	0	0	0	0
AL136309.3	0	0	0	0	0	0	0	0	0	0	0	0	0	0	0	0	0	0	0	0	0	0	0	0	0	0	0	0	0	0	0	0	0	0	0	0	0	0	0	0	0	0	0	0	0	0	0	0	0
AL159166.1	0	0	0	0	0	0	0	0	0	0	0	0	0	0	0	0	0	0	0	0	0	0	0	0	0	0	0	0	0	0	0	0	0	0	0	0	0	0	0	0	0	0	0	0	0	0	0	0	0
LINC02533	0	0	0	0	0	0	0	0	0	0	0	0	0	0	0	0	0	0	0.0383504	0	0	0	0	0	0	0	0	0	0	0	0	0	0	0	0	0	0	0	0	0	0	0	0	0	0	0	0	0	0
AL034376.1	0	0	0	0	0	0.188935	0	0	0	0	0	0	0	0	0	0	0	0	0	0	0	0	0	0	0	0	0	0	0	0.156538	0	0	0	0.127692	0	0	0	0	0	0	0	0	0	0	0	0	0	0	0
AL359643.2	0.151365	0.0565523	0.0996123	0.126056	0.117042	0.0937905	0.100033	0.20092	0.109161	0.157055	0.20052	0.27046	0.0699922	0.0420811	0.157055	0.0456669	0.118352	0.12437	0.0502827	0.187894	0.0990901	0.0946503	0.214396	0.108409	0.141664	0.0973112	0.242595	0.105298	0.182563	0.145026	0.0699367	0.195362	0.0475765	0.0615802	0.0521681	0.158164	0.126691	0.226969	0.0881516	0.103693	0.134888	0.0639811	0.183474	0.036151	0.102924	0.129128	0.0362386	0.114709	0.0461531
AL136307.1	0	0	0	0	0	0	0	0	0	0	0.188761	0	0	0	0	0	0	0	0	0	0	0	0	0	0	0	0	0	0	0	0	0.274375	0	0	0	0	0	0	0	0	0	0	0	0	0	0	0.170979	0	0
AL031123.2	0.62124	0.370365	0.564612	0.280006	0.490544	0.452689	0.662327	0.302863	0.437567	0.327033	0.20052	0.551606	0.240208	0.581424	0.404347	0.315215	0.472661	0.237715	0.501819	0.310169	0.228665	0.198081	0.214396	0.357678	0.339495	0.288384	0.284526	0.416547	0.289011	0.312462	0.514588	0.503179	0.280533	0.611655	0.429875	0.520622	0.388224	0.292212	0.52482	0.348056	0.277149	0.631421	0.418765	0.408389	0.465841	0.300474	0.281123	0.114709	0.746147
AL031123.1	0	0	0.144781	0	0	0	0.163449	0	0	0	0	0	0.0847062	0.0707	0	0.244965	0	0	0.0735347	0	0	0	0	0.0860821	0	0	0	0	0.45916	0.130446	0	0.164238	0.233656	0.0996802	0	0	0.113783	0	0.310471	0	0	0.101474	0	0.158984	0	0	0	0	0.139955
AL136361.1	0	0	0	0	0	0	0	0	0	0	0	0	0	0	0	0	0	0	0	0	0	0	0	0	0	0	0	0	0	0	0	0	0	0	0	0	0	0	0	0	0	0	0	0	0	0	0	0	0
AL359378.1	0	0	0.0561975	0	0	0	0	0	0	0	0	0	0	0	0	0	0	0	0.164842	0	0	0	0	0	0	0	0	0	0	0	0	0	0	0	0	0	0	0	0	0	0	0	0	0	0	0	0	0	0
AL138885.2	0	0	0	0	0	0	0	0	0	0	0	0	0	0	0	0	0	0	0	0	0	0	0	0	0	0	0	0	0	0	0	0	0	0	0	0	0	0	0	0	0	0	0	0	0	0	0	0	0
MIR5689HG	0	0	0	0	0	0	0	0	0	0	0	0	0	0	0	0	0	0	0	0	0	0	0	0	0	0	0	0	0	0	0	0	0	0	0	0	0	0	0	0	0	0	0	0	0	0	0	0	0
LINC02522	0	0	0	0	0	0	0	0	0	0	0	0	0	0	0	0	0	0	0	0	0	0	0	0	0	0	0	0	0	0	0	0	0	0	0	0.955803	0	0	0	0	0.813211	0	0	0	0	0	0	0	0
AL024498.1	0.62124	0.0825679	0.224267	0.390182	0.410044	0.136828	0.50368	0.363498	0.417482	0.227727	0.247842	0.0929584	0.227163	0.255284	0.353712	0.371223	0.25397	0.330099	0.198495	0.326487	0.115815	0.0946503	0.134235	0.19968	0.207205	0.112899	0.346259	0.255284	0.156336	0.481333	0.338794	0.186749	0.199298	0.254765	0.233039	0	0.264267	0.242826	0.350529	0.21128	0.491085	0.464806	0.219951	0.210123	0.385756	0.202175	0.210282	0.0816648	0.260191
AL445430.1	0	0	0	0	0	0	0	0	0	0	0	0	0	0	0	0	0	0	0	0	0	0	0	0	0	0	0	0	0	0	0	0	0	0	0	0	0	0	0	0	0	0	0	0	0	0	0	0	0
AL445430.2	0	0	0	0	0	0	0	0	0	0	0	0	0	0	0	0	0	0	0	0	0	0	0	0	0	0	0	0	0	0	0	0	0	0	0	0	0	0	0	0	0	0	0	0	0	0	0	0	0
AL357518.1	0	0	0	0	0	0	0	0	0	0	0	0	0	0	0	0	0	0	0	0	0	0	0	0	0	0	0	0	0	0	0	0	0	0	0	0	0	0	0	0	0	0	0	0	0	0	0	0	0
AL022724.1	0	0	0	0	0	0	0	0	0	0	0.107146	0	0	0	0	0	0	0	0	0	0	0	0	0	0	0	0	0	0	0	0	0	0	0	0	0	0	0.184948	0	0	0	0	0	0	0.219716	0	0	0	0
AL157373.2	0.993036	0.552354	1.11126	1.22634	1.00992	1.48767	0.625413	0.931975	1.22886	1.14577	0.805807	2.08263	0.814423	0.40122	0.731322	0.840349	1.46662	1.07264	1.22634	0.577125	1.08254	1.1156	0.623634	0.678689	0.536664	0.883043	1.02796	0.696544	1.01533	1.46662	1.35341	0.361654	1.27051	1.22886	1.22634	1.57967	0.402586	0.421013	0.897857	0.989509	1.93061	1.75349	0.506705	0.618843	2.27125	0.743689	0.849766	0.913907	1.24706
LINC02530	0	0	0	0.196086	0	0	0	0	0	0	0	0	0	0	0	0	0	0	0	0	0	0	0	0	0	0	0	0	0	0	0	0	0	0	0	0	0	0	0	0	0	0	0	0	0	0	0	0	0.0811566
AL008729.2	2.37393	2.50603	1.88076	2.65363	3.81408	2.69937	2.29573	2.37393	2.01427	2.58798	2.16443	2.35747	2.44713	2.14991	2.65363	2.54807	2.7678	2.72363	1.79155	1.78099	2.98557	3.07546	2.65363	3.17555	3.27929	3.58608	2.7468	2.81909	2.72363	2.81909	2.03231	2.79329	1.43072	2.67559	2.78054	2.52555	3.31792	1.48416	2.7678	1.86064	2.06317	2.23959	2.13523	1.51656	2.50603	2.46642	2.94169	2.42791	3.38983
AL023583.1	0.198802	0.0565523	0.0809582	0.108305	0.117042	0	0.0922865	0.156336	0.0899951	0.157055	0.290394	0.252474	0.145262	0.142766	0.169573	0.13929	0.0925858	0.114988	0.233656	0.113929	0.0498668	0	0.134235	0.165383	0.141664	0	0.0607777	0.105298	0.0771978	0.188388	0	0.0980296	0.233656	0.0860821	0.222043	0.145141	0.174764	0.19968	0.102299	0.0763144	0.182749	0	0	0.0308068	0.129713	0	0.126244	0.114709	0.289323
AL022396.1	0	0	0	0	0	0	0	0	0	0	0	0	0	0	0	0	0	0	0	0	0	0	0	0	0	0	0	0	0	0	0	0	0	0	0	0	0	0	0	0	0	0	0	0	0	0	0	0	0
AL353152.1	0	0	0	0	0	0	0	0	0	0	0	0	0	0	0	0	0	0	0	0	0.131225	0	0	0	0	0	0	0	0	0.156538	0	0	0	0	0	0	0	0	0.161246	0	0	0	0	0	0	0	0.138884	0	0
LINC01108	0	0.0327141	0.026965	0	0	0	0	0	0	0	0	0	0	0	0	0	0	0	0	0	0	0	0	0	0	0	0	0	0	0	0	0	0	0	0	0	0	0	0	0	0.0584458	0	0	0	0	0	0	0	0
AL080313.2	0	0	0	0	0	0	0	0	0	0	0	0	0	0	0	0	0	0	0	0	0	0	0	0	0	0	0	0	0	0	0	0	0	0	0	0	0	0	0	0	0	0	0	0	0	0	0	0	0
AL080313.1	0	0	0	0	0	0	0	0	0	0	0	0	0	0	0	0	0	0	0	0	0	0	0	0	0	0	0	0	0	0	0	0	0	0	0	0	0	0	0	0	0	0	0	0	0	0.202175	0	0	0
AL109914.1	0	0	0	0	0	0	0	0	0	0	0	0	0	0	0	0	0	0	0	0	0	0	0	0	0	0	0	0	0	0	0	0	0	0	0	0	0	0	0	0	0	0	0	0	0	0	0	0	0
AL138720.1	0	0.0565523	0	0	0	0	0	0	0	0	0	0	0	0	0	0.0699367	0	0	0	0	0	0	0	0	0	0	0	0	0	0	0	0	0	0	0	0	0	0	0	0	0	0	0	0	0	0	0	0	0
AL136162.1	0.0826448	0.15674	0.116846	0.117784	0.237913	0.136828	0.184789	0.0737704	0.064601	0.168112	0.346259	0.192026	0.117983	0.0300284	0.371497	0.0699367	0	0.0756927	0.066968	0.293349	0.241292	0.1433	0.264915	0.0739641	0.108513	0.154124	0.10493	0.105298	0.289011	0.360777	0.0790515	0.243376	0.153295	0.181745	0.161123	0.145141	0.252474	0	0.148561	0.2471	0	0.172695	0.19307	0.104715	0	0.0976288	0.323983	0.114709	0.672301
LINC02543	0	0	0	0	0	0	0	0	0	0	0	0	0	0	0	0	0	0	0	0	0	0	0	0	0	0	0	0	0	0	0	0	0	0	0	0	0	0	0	0	0	0	0	0	0	0	0	0	0
AL137003.2	0.843035	0.832366	1.15455	0.744918	0.783213	0.650019	0.754772	0.918509	0.878782	0.883043	1.25501	0.737517	0.780876	0.989509	1.0592	1.01354	1.10499	0.78552	0.837692	0.543364	0.836394	0.679444	1.02985	0.804671	0.699395	1.15455	0.76624	0.996494	0.813211	0.688981	0.544729	0.82587	0.821721	0.931975	0.751344	1.55606	0.984265	0.779643	0.840349	0.87748	0.832366	0.612429	1.04934	0.800055	0.787916	0.770349	0.698474	1.46662	0.612429
[truncated: 4,074 more rows]
[truncated: 299 more columns]

## Sheet: Table SⅣ Downregulated
Tag	logFC	adj.P.Val
MEG3	-12.4615	5.72e-87
NEAT1	-18.5065	4.33e-46
ROCR	-2.65239	3.53e-51
LINC00261	-2.45707	2.05e-07
JPX	-1.02827	5.25e-25
LINC00665	-1.04235	1.53e-19
LINC00662	-1.06118	2.48e-79
MEG8	-1.16614	2.98e-44
LINC00668	-1.21351	5.67e-08
LINC00667	-1.86711	9.41e-46
LINC01089	-3.38602	1.05e-89
LINC01123	-3.89734	5.12e-104
DIO3OS	-1.73181	2.01e-21
SNHG9	-4.90367	1.31e-53
APTR	-1.4156	3.99e-26
SNHG25	-1.39989	7.69e-10
LINC01354	-1.24007	3.98e-72
LINC01106	-4.72954	8.63e-116
PWRN1	-1.48434	7.11e-72
LINC00240	-1.10597	4.18e-107
SNHG18	-1.59098	1.02e-09
GLIDR	-1.10766	3.32e-80
LINC00476	-1.27774	1.73e-85
LINC00671	-5.21526	7.63e-67
LINC00663	-2.02622	7.62e-108
LINC01152	-1.57959	1.74e-85
ZNF503-AS1	-1.50866	1.67e-52
FP236241.1	-1.54829	2.79e-53
MIR217HG	-2.99197	1.24e-30
MIR29B2CHG	-1.53344	1.41e-52
AC007207.2	-4.11366	1.9e-13
AC011298.1	-6.37821	7.79e-97
AC084018.2	-1.27942	3.47e-115
AC091057.3	-3.75037	4.29e-135
AC112491.1	-2.64915	1.88e-31
AC138035.1	-3.36109	4.56e-143
AF117829.1	-1.35489	4.9e-100
AL117190.1	-1.60911	2.05e-35
AL359715.1	-1.0067	7.44e-67
CU638689.4	-1.59371	5.86e-54
GMDS-DT	-2.44085	1.06e-135
LINC01001	-5.22204	2.16e-143
LINC01624	-4.85869	6.1e-102
AC004982.1	-1.47958	1.25e-59
AC004982.2	-4.72844	8.58e-76
AC007349.1	-1.01154	1.58e-29
AC008014.1	-1.91418	1.06e-75
AC008556.1	-2.01702	2.88e-75
AC009041.2	-1.97529	7.57e-23
AC010329.1	-1.5618	7.87e-46
AC010719.1	-5.2929	1.98e-75
AC011450.1	-1.23026	2.53e-41
AC015813.1	-2.13043	1.06e-73
AC020656.2	-1.18529	2.09e-51
AC020907.1	-1.11858	1.37e-32
AC025811.1	-1.16941	8.76e-44
AC026150.1	-1.38442	2.1e-101
AC091132.4	-1.09794	3.5e-66
AC092683.1	-5.47835	2.99e-135
AC093752.3	-1.45548	3.63e-94
AC110285.2	-1.32119	9.66e-24
AC123768.4	-2.36588	1.93e-121
AC123912.4	-1.87164	2.02e-27
AC146944.4	-3.09193	6.4e-153
AC148476.1	-2.3529	3.2e-44
AC159540.2	-3.40949	9.25e-93
AC240565.2	-2.15328	2.53e-120
AC245297.2	-1.26741	4.19e-120
AF111169.1	-2.50818	1.5e-125
AL008729.2	-2.43195	1.41e-136
AL021368.2	-1.01184	1.13e-143
AL109910.2	-1.09309	5.81e-51
AL138478.1	-3.39963	2.12e-150
AL157871.1	-1.26715	3.77e-36
AL449403.2	-1.00383	7.9e-56
AL512625.1	-1.50477	1.22e-82
AL590399.1	-1.15364	3.53e-96
AL590426.2	-1.26994	1.22e-59
AL669831.5	-1.16049	4.11e-115
AP001120.2	-1.45897	2.14e-39
AP002360.3	-1.09519	8.36e-38
AP005329.3	-2.01543	2.32e-123
CDC37L1-DT	-1.27876	4.44e-44
CU633904.1	-3.10898	2.19e-68
CU633906.2	-1.31392	7.15e-97
CU633967.1	-3.59294	6.08e-113
FAM157C	-2.53583	5.44e-104
FAM95B1	-3.59171	2.7e-121
FP236383.3	-23.7231	1.7e-155
FP671120.4	-23.273	4.57e-154
LINC01625	-1.01651	5.32e-62
LINC02193	-3.78796	1.8e-68
LINC02256	-1.32208	6.76e-71
LINC02417	-1.21467	2.03e-52
LINC02432	-2.16332	9.11e-49
LINC02447	-1.27145	3.38e-79
LINC02449	-1.05445	1.8e-34
LINC02568	-1.79136	8.02e-50
MUC20-OT1	-8.71745	9.29e-158
RAB30-AS1	-1.83167	3.96e-77
RFPL3S	-1.1511	0.000143605
RMRP	-1.85139	1.37e-35
VASH1-AS1	-4.52174	2.39e-160
LINC00930	-1.49539	1.67e-41

## Sheet: Table SⅣUpregulated
Tag	logFC	adj.P.Val
UCA1	7.31761	4.3659e-16
LINC00460	1.56396	4.6759e-14
FOXD2-AS1	1.30499	2.07002e-61
CASC9	1.10882	2.83846e-13
CYTOR	1.10625	8.15537e-06
MIR22HG	1.98386	3.01224e-11
LINC01116	1.1701	3.59992e-30
LINC01133	14.5313	1.48823e-38
HCG11	1.78194	3.226e-43
TP53TG1	7.0694	4.50249e-65
MIR210HG	2.12683	2.54272e-14
LINP1	1.44654	6.60408e-21
LINC01503	3.08971	8.63409e-20
LINC00857	1.9236	1.10584e-58
LINC01559	4.4957	1.98685e-17
LINC01871	1.6362	1.52756e-26
LINC02381	8.34281	6.19775e-30
LINC01614	5.78406	8.57889e-18
LINC01857	1.54413	3.75198e-09
LINC00342	7.1737	1.31169e-15
IGFL2-AS1	1.40527	1.70877e-05
PSMB8-AS1	2.70472	4.82852e-23
AL161431.1	1.46123	8.3718e-06
LINC01436	1.20491	3.58109e-07
LINC01711	1.67185	6.90082e-08
AP003555.2	1.0704	4.18454e-45
MIR222HG	1.10925	7.06773e-22
LINC00524	1.17864	3.9311e-36
AC245041.2	1.45047	5.36024e-35
AC009283.1	1.51241	5.58253e-31
AC103702.2	2.06103	5.6158e-32
AL365203.2	2.06923	1.50431e-32
LINC00926	1.09723	0.032285
AP006621.2	1.2121	1.9714e-49
AP000439.2	1.21888	8.99157e-28
LINC00920	1.4095	3.23115e-36
AC022784.1	1.5728	7.07492e-08
LINC01843	1.73339	2.04419e-44
LINC01705	2.19123	5.46797e-23
LINC02086	4.09722	1.7374e-22
SNHG19	5.11476	1.14003e-07
AP005233.2	9.21827	4.87398e-26
AL589843.1	1.02074	4.82621e-34
AC093297.2	1.04521	3.2996e-50
AC027031.2	1.16297	2.32748e-23
AC004816.1	1.60895	1.86153e-27
AL512274.1	1.64122	1.66159e-38
URB1-AS1	1.75122	7.0704e-39
AP001189.3	1.98501	3.67795e-41
AL390719.2	2.0588	5.137e-05
SMIM25	2.26449	4.75029e-17
LINC02001	2.37546	1.8345e-63
LINC02544	3.04751	7.68459e-17
LINC02041	3.59091	5.25212e-52
AC015922.2	4.4029	6.48684e-32
AC026401.3	4.60794	8.0005e-62
ILF3-DT	4.70001	4.35837e-43
SCAMP1-AS1	1.04134	1.59752e-30
AC046143.2	1.0661	3.77128e-51
AC019069.1	1.06667	6.63718e-62
LINC01770	1.06988	9.27708e-15
AC060766.4	1.08642	7.82357e-48
AC080037.1	1.10149	3.33019e-34
AC132872.1	1.12064	4.6592e-21
AL132712.1	1.12487	1.67881e-57
AL132712.2	1.13216	1.31663e-50
AC091982.3	1.13736	2.37735e-60
AL049836.1	1.13945	1.74646e-24
AC134312.5	1.14352	4.59228e-42
AP003555.3	1.15804	5.91171e-29
AL583785.1	1.16395	0.000159185
LINC01637	1.16487	5.57376e-37
AC002401.4	1.18154	1.8265e-15
AC068870.2	1.20364	6.82888e-25
AP001505.1	1.22346	1.97945e-29
AL023284.4	1.26354	7.52145e-17
AC092171.2	1.28349	9.72075e-39
AC008555.5	1.31598	3.50268e-67
AL035071.1	1.33193	1.46075e-17
AC113346.1	1.36371	1.8878e-21
AC120498.4	1.39365	8.93859e-21
AC010998.3	1.43797	5.90459e-09
LINC02253	1.44713	7.84519e-14
LINC02562	1.4806	1.44424e-29
AC106782.2	1.57601	2.11686e-71
AC018645.2	1.6048	1.19879e-27
AC090617.5	1.64485	5.8612e-54
AC090204.1	1.67503	2.80701e-32
LINC02188	1.74979	1.71677e-22
Z98257.1	1.75361	9.14821e-14
AC254633.1	1.86333	6.364e-34
AC005261.3	1.86811	1.24488e-73
AC026471.4	1.96165	2.69022e-77
AC021218.1	2.18097	3.53995e-29
AC048341.2	2.18562	4.03875e-20
AC040977.1	2.3195	1.28093e-68
AL139246.3	2.62186	5.95408e-45
AC005261.1	2.68392	9.13212e-60
AC147067.1	2.74171	5.17909e-43
AC015922.3	2.8495	2.51229e-29
AL365226.2	3.47542	0.00955183
AC091563.1	4.00612	1.47868e-56
AC016735.1	5.26817	1.61048e-39
